# Supplementary material
Source: PubMed Central journal article supplement (PMC2783890)

## Supporting Information

# Lacosamide Isothiocyanate-based Agents: Novel Agents to Target and Identify Lacosamide Receptors

*Ki Duk Park,<sup>1</sup> Pierre Morieux,<sup>1</sup> Christophe Salomé,<sup>1</sup> Steven W. Cotten,<sup>1</sup> Onrapak Reamtong,<sup>2</sup> Claire Eyers,<sup>2</sup> Simon J. Gaskell,<sup>2</sup> James P. Stables,<sup>3</sup> Rihe Liu<sup>1,4,\*</sup> and Harold Kohn<sup>1,5,\*</sup>*

<sup>1</sup>Division of Medicinal Chemistry and Natural Products, UNC Eshelman School of Pharmacy, University of North Carolina, Chapel Hill, North Carolina 27599-7568, USA

<sup>2</sup>Michael Barber Centre for Mass Spectrometry, Manchester Interdisciplinary Biocentre, University of Manchester, 131 Princess Street, Manchester, M1 7DN, UK

<sup>3</sup>Anticonvulsant Screening Program, National Institute of Neurological Disorders and Stroke, National Institutes of Health, 6001 Executive Blvd., Suite 2106, Rockville, MD 20892-9523, USA

<sup>4</sup>Carolina Center for Genome Sciences, University of North Carolina, Chapel Hill, North Carolina 27599-7264, USA

<sup>5</sup>Department of Chemistry, University of North Carolina, Chapel Hill, North Carolina 27599-3290, USA

## Table of Contents

|                                                                                                                      |     |
|----------------------------------------------------------------------------------------------------------------------|-----|
| 1. Supplemental Experimental Section                                                                                 |     |
| 1.1. Purification of Probe-labeled Proteins -----                                                                    | S3  |
| 1.2. Western Blot -----                                                                                              | S3  |
| 1.3. In-gel tryptic digestion -----                                                                                  | S3  |
| 1.4. Mass spectrometry analysis -----                                                                                | S4  |
| 1.5. Synthesis of ( <i>R</i> )- and ( <i>S</i> )- <b>28</b> and <b>30</b> -----                                      | S5  |
| 1.6. Synthesis of ( <i>R</i> )- and ( <i>S</i> )- <b>27</b> -----                                                    | S10 |
| 1.7. Synthesis of ( <i>R</i> )- and ( <i>S</i> )- <b>29</b> -----                                                    | S14 |
| 1.8. Synthesis of <b>21</b> -----                                                                                    | S20 |
| 1.9. Synthesis of <b>39</b> -----                                                                                    | S22 |
| 1.10. Synthesis of <b>40</b> -----                                                                                   | S23 |
| 2. Supplemental Tables                                                                                               |     |
| 2.1. Table S1. Quantification of the ( <i>R</i> )- <b>9</b> , ( <i>S</i> )- <b>9</b> of the 62kDa using iTRAQ. ----- | S26 |
| 2.2. Table S2. Elemental Analysis of the Synthesized Compounds -----                                                 | S27 |
| 3. References -----                                                                                                  | S28 |
| 4. <sup>1</sup> H and <sup>13</sup> C-NMR spectra -----                                                              | S30 |

**Purification of Probe-labeled Proteins.** Mouse brain lysate (500  $\mu$ L of 2.0 mg/mL protein in 50 mM HEPES buffer (pH 7.4)) was passed through a NAP-5 column to exchange buffer to an aqueous 50 mM HEPES buffer (pH 8.0). Lysate aliquots (200  $\mu$ L) were treated with (*R*)-**9** (30  $\mu$ M) at room temperature (30 min). To the modified lysate was sequentially added **35** (200  $\mu$ M), TCEP (500  $\mu$ M), TBTA (200  $\mu$ M) and CuSO<sub>4</sub> (1 mM). The samples was shaken and then allowed to rotate using Roto-shake (8 rpm, Scientific Industries Inc., Model No. SI-1100, Bohemia, NY) at room temperature (1 h). After passage through a NAP-5 column, the sample was added to an immobilized streptavidin slurry (0.3 mL) (High Capacity Streptavidin Agarose Resin, Pierce, Rockford, IL) and rotated (15 rpm) at 4 °C (90 min). The streptavidin beads were sequentially washed with aqueous 0.1% Triton X-100/15 mM HEPES buffer (pH 7.4) (3  $\times$  0.8 mL), an aqueous 6 M urea solution (3  $\times$  0.8 mL), and an aqueous 15 mM HEPES buffer (pH 7.4) (4  $\times$  0.8 mL). The beads were centrifuged (1000 rpm, 1 min), and the supernatant removed. The beads were treated with loading buffer (aqueous 2% SDS, 10% glycerol, 1% mercaptoethanol, 0.01% bromophenol blue [final concentration]) (95 °C, 5 min). The samples were loaded on a 10% SDS-PAGE gel and the proteins visualized by silver staining.

**Western Blot.** The SDS-PAGE gel was transferred to a nitrocellulose membrane (RPN203D, Amersham) and the membrane was washed (10 min) with TBST (aqueous 25 mM Tris buffer, 150 mM NaCl, 0.1% Tween-20 (pH 7.6)). The membrane was incubated in aqueous 5% NFDM (Non-Fat Dried Milk)/TBST solution (50 mL) at room temperature (1 h) and then incubated with either a polyclonal antibody (0.15  $\mu$ g/mL) specific for CRMP2 (C2993, Sigma) or a monoclonal antibody (0.5  $\mu$ g/mL) specific for GST (sc-138, Santa Cruz Biotech.) in aqueous 5% NFDM/TBST solution (1.5 mL) at room temperature (2 h). After washing ( $\times$  4, 5 min each) with TBST, the membrane was incubated with either ECLTM anti-rabbit IgG (NA934, GE Healthcare) or anti-mouse IgG (31430, Pierce Biotech.) in an aqueous 5% NFDM/TBST solution (1.5 mL) at room temperature (1 h) and washed ( $\times$  5, 5 min each) with TBST. Chemiluminescent reagent (RPN2132, GE Healthcare) was added to the blot and the signal developed in the darkroom.

**In-gel tryptic digestion.** All gel pieces were dehydrated and then rehydrated with an aqueous trypsin solution in 50 mM triethyl ammonium bicarbonate buffer (TEAB) (100  $\mu$ L, 0.02 mg/mL), and incubated overnight (37 °C). An equal volume (100  $\mu$ L) of acetonitrile was added to the gel pieces and shaken for 20 min. The supernatant was collected and acetonitrile removed. To each digested sample tubes were added iTRAQ reagents in ethanol and the reaction solutions were incubated at room temperature (1 h). The iTRAQ labeled samples were combined into one tube, evaporated to dryness and analyzed as described below.

**Mass spectrometry analysis.** The iTRAQ labelled peptides were separated using an Ultimate 3000 capillary LC system (Dionex, Surrey, UK). The HPLC eluent was infused directly into nano-electrospray source of QToF Global (Waters, Manchester, UK). The mass spectrometry data was searched using the Mascot search algorithm to get protein identification and iTRAQ quantification. The search was done against swiss-Prot database, miss cleavages were set to 1 and peptide and tandem MS tolerances were set at 100ppm.



## Scheme S1. Synthesis of (*R*)- and (*S*)-**28** and **30**

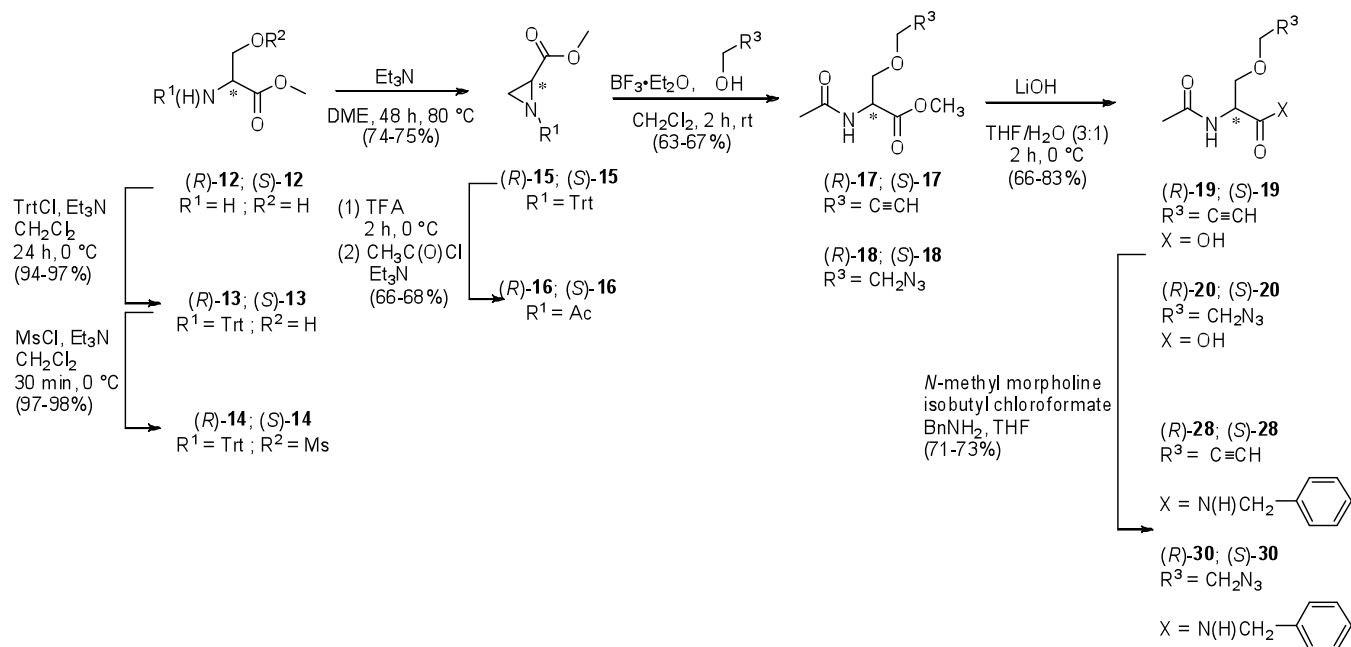

**(*R*)-Methyl 3-Hydroxy-2-(*N*-tritylamino)propionate ((*R*)-**13**)**.<sup>1</sup> To a solution of D-serine methyl ester hydrochloride ((*R*)-**12**) (20.00 g, 0.13 mol) and Et<sub>3</sub>N (35.82 mL, 0.26 mol) in CH<sub>2</sub>Cl<sub>2</sub> (80 mL) at 0 °C, was added in one portion a solution of TrtCl (36.53 g, 0.13 mol) in CH<sub>2</sub>Cl<sub>2</sub> (80 mL). The mixture was allowed to stir at 0 °C (24 h) under Ar and then successively washed with 10% aqueous citric acid (120 mL) and brine (120 mL). The organic layer was dried (Na<sub>2</sub>SO<sub>4</sub>) and evaporated in vacuo to yield 45.20 g (97%) of crude (*R*)-**13** as a pale yellow crystalline solid. The product was used for next step without further purification: *R*<sub>f</sub> = 0.50 (1/1 EtOAc/hexanes); <sup>1</sup>H NMR (CDCl<sub>3</sub>) δ 2.29 (br s, 1 H), 2.98 (br s, 1 H), 3.29 (s, OCH<sub>3</sub>), 3.51–3.60 (m, CHH'OH, CH), 3.64–3.74 (m, CHH'OH), 7.16–7.30 (m, 9 ArH), 7.47–7.50 (m, 6 ArH).

**(*S*)-Methyl 3-Hydroxy-2-(*N*-tritylamino)propionate ((*S*)-**13**)**.<sup>2,3</sup> Utilizing the procedure and work up procedure for (*R*)-**13**, and using L-serine methyl ester hydrochloride ((*S*)-**12**) (20.00 g, 0.13 mol), Et<sub>3</sub>N (35.82 mL, 0.26 mol) and TrtCl (36.53 g, 0.13 mol) gave 43.80 g (94%) of crude (*S*)-**13** as a pale yellow crystalline solid: *R*<sub>f</sub> = 0.50 (1/1 EtOAc/hexanes); <sup>1</sup>H NMR (CDCl<sub>3</sub>) δ 2.31 (br s, 1 H), 2.84–3.02 (br m, 1 H), 3.29 (s, OCH<sub>3</sub>), 3.50–3.59 (m, CHH'OH, CH), 3.63–3.74 (m, CHH'OH), 7.18–7.29 (m, 9 ArH), 7.48–7.50 (m, 6 ArH).

**(*R*)-Methyl 1-Tritylaziridine-2-carboxylate ((*R*)-**15**)**.<sup>4,5</sup> Crude (*R*)-**13** (45.20 g, 0.13 mol) was dissolved in CH<sub>2</sub>Cl<sub>2</sub> (300 mL) and cooled to 0 °C under Ar. Methanesulfonyl chloride (10.64 mL, 0.14

mol) was added to the cooled solution, followed by the dropwise addition of Et<sub>3</sub>N (26.14 mL, 0.19 mol). The resulting solution was allowed to stir at 0 °C (30 min) and then successively washed with 10% aqueous citric acid (200 mL) and brine (200 mL). After drying (Na<sub>2</sub>SO<sub>4</sub>) and evaporation of the solvent, the crude mesylate ((*R*)-**14**) (53.30 g, 0.12 mol) was dissolved in DME (300 mL) and Et<sub>3</sub>N (33.73 mL, 0.24 mol) was added. The reaction mixture was stirred at 80 °C (48 h) and then evaporated in vacuo. The residue was dissolved in EtOAc (300 mL) and washed with 10% aqueous citric acid (200 mL) and brine (200 mL). The organic layer was dried (Na<sub>2</sub>SO<sub>4</sub>) and evaporated in vacuo. The crude product was recrystallized (EtOH) to yield 30.81 g (74%) of (*R*)-**15** as a transparent crystal: mp 127–128 °C (lit.<sup>3a</sup> mp 129–131 °C); [ $\alpha$ ]<sub>D</sub><sup>25</sup> +94.7° (c 1.5, CHCl<sub>3</sub>) (lit.<sup>3b</sup> [ $\alpha$ ]<sub>D</sub><sup>20</sup> +95° (c 1.0, CHCl<sub>3</sub>)); *R*<sub>f</sub> = 0.45 (1/5 EtOAc/hexanes); <sup>1</sup>H NMR (CDCl<sub>3</sub>)  $\delta$  1.41 (dd, *J* = 1.7, 6.4 Hz, NCHH'CH), 1.89 (dd, *J* = 2.8, 6.4 Hz, CHH'CHN), 2.26 (dd, *J* = 1.7, 2.8 Hz, NCHH'CH), 3.76 (s, OCH<sub>3</sub>), 7.20–7.31 (m, 9 ArH), 7.48–7.52 (m, 6 ArH); <sup>13</sup>C NMR (CDCl<sub>3</sub>)  $\delta$  28.8 (NCH<sub>2</sub>CH), 31.8 (CH<sub>2</sub>CHN), 52.2 (OCH<sub>3</sub>), 74.5 (NCPH<sub>3</sub>), 127.1, 127.8, 129.4, 143.7 (3 C<sub>6</sub>H<sub>5</sub>), 172.0 (C(O)).

**(S)-Methyl 1-Tritylaziridine-2-carboxylate ((S)-15).**<sup>2,4,5</sup> Utilizing the preceding procedure and work-up for (*R*)-**15**, and using crude (*S*)-**2** (43.80 g, 0.12 mol), methanesulfonyl chloride (10.30 mL, 0.13 mol) and Et<sub>3</sub>N (25.30 mL, 0.18 mol) gave crude mesylate ((*S*)-**14**) (53.90 g, 0.12 mol), which was treated with Et<sub>3</sub>N (34.29 mL, 0.25 mol) to yield 31.58 g (75%) of (*S*)-**15** as a transparent crystal: mp 127–128 °C (lit.<sup>3a</sup> mp 130–131 °C); [ $\alpha$ ]<sub>D</sub><sup>20</sup> –95.1 (c 1.5, CHCl<sub>3</sub>) (lit.<sup>3b</sup> [ $\alpha$ ]<sub>D</sub><sup>20</sup> –94.2° (c 1.0, CHCl<sub>3</sub>)); *R*<sub>f</sub> = 0.45 (1/5 EtOAc/hexanes); <sup>1</sup>H NMR (CDCl<sub>3</sub>)  $\delta$  1.41 (dd, *J* = 1.7, 6.4 Hz, NCHH'CH), 1.89 (dd, *J* = 2.8, 6.4 Hz, CHH'CHN), 2.26 (dd, *J* = 1.7, 2.8 Hz, NCHH'CH), 3.75 (s, OCH<sub>3</sub>), 7.18–7.30 (m, 9 ArH), 7.48–7.52 (m, 6 ArH); <sup>13</sup>C NMR (CDCl<sub>3</sub>)  $\delta$  28.9 (NCH<sub>2</sub>CH), 31.9 (CH<sub>2</sub>CHN), 52.3 (OCH<sub>3</sub>), 74.6 (NCPH<sub>3</sub>), 127.1, 127.8, 129.5, 143.8 (3 C<sub>6</sub>H<sub>5</sub>), 172.1 (C(O)).

**(R)-Methyl 1-Acetylaziridine-2-carboxylate ((R)-16).**<sup>6</sup> (*R*)-Methyl 1-tritylaziridine-2-carboxylate ((*R*)-**15**) (9.00 g, 26.24 mmol) was dissolved in MeOH/CHCl<sub>3</sub> (1:1, 90 mL) and cooled to 0 °C under Ar and TFA (15.15 mL, 196.80 mmol) was added dropwise. After the reaction mixture was allowed to stir at 0 °C (2 h), the solvent was evaporated in vacuo. The product was dissolved in CH<sub>2</sub>Cl<sub>2</sub> (120 mL), cooled to 0 °C, and Et<sub>3</sub>N (18.29 mL, 131.20 mmol) and AcCl (2.04 mL, 28.86 mmol) were added in two portions over 5 min. The solution was stirred at 0 °C (1 h) and then washed with saturated aqueous NaHCO<sub>3</sub> (100 mL) and saturated aqueous brine (100 mL). The organic layer was dried (Na<sub>2</sub>SO<sub>4</sub>) and evaporated in vacuo, and then the crude product was purified by silica gel column chromatography (1/1 EtOAc/hexanes) and crystallized (cold hexanes) to yield 2.46 g (66%) of (*R*)-**16** as a clear crystal: mp 39–40 °C; [ $\alpha$ ]<sub>D</sub><sup>25</sup> +84.3° (c 1.2, CHCl<sub>3</sub>); *R*<sub>f</sub> = 0.30 (1/2 EtOAc/hexanes); <sup>1</sup>H NMR (CDCl<sub>3</sub>)  $\delta$  2.16 (s, CH<sub>3</sub>C(O)), 2.51 (dd, *J* = 1.8, 5.5 Hz, NCHH'CH), 2.58 (dd, *J* = 1.8, 3.0 Hz, NCHH'CH), 3.16 (dd, *J* = 3.0, 5.5 Hz, CHH'CHN), 3.80 (s, OCH<sub>3</sub>); <sup>13</sup>C NMR (CDCl<sub>3</sub>)  $\delta$  23.7 (CH<sub>3</sub>C(O)),

30.9 (NCH<sub>2</sub>CH), 34.4 (CH<sub>2</sub>CHN), 52.9 (OCH<sub>3</sub>), 168.9 (C(O)O), 180.6 (C(O)N); *M<sub>r</sub>* (+ESI) 166.0474 [M+Na]<sup>+</sup> (calcd for C<sub>6</sub>H<sub>9</sub>NO<sub>3</sub>Na<sup>+</sup> 166.0480 [M+Na]<sup>+</sup>).

**(S)-Methyl 1-Acetylaziridine-2-carboxylate ((S)-16).**<sup>6</sup> Utilizing the preceding procedure and work-up for (*R*)-**16**, and using (*S*)-**15** (9.00 g, 26.24 mmol), TFA (15.15 mL, 196.80 mmol), Et<sub>3</sub>N (18.29 mL, 131.20 mmol) and AcCl (2.04 mL, 28.86 mmol) gave 2.56 g (68%) of (*S*)-**16** as a clear crystal: mp 39–40 °C; [α]<sub>D</sub><sup>25</sup> –83.9° (c 1.2, CHCl<sub>3</sub>); *R<sub>f</sub>* = 0.30 (1/2 EtOAc/hexanes); <sup>1</sup>H NMR (CDCl<sub>3</sub>) δ 2.17 (s, CH<sub>3</sub>C(O)), 2.51 (dd, *J* = 1.8, 5.4 Hz, NCHH'CH), 2.58 (dd, *J* = 1.8, 2.9 Hz, NCHH'CH), 3.16 (dd, *J* = 2.9, 5.4 Hz, CHH'CHN), 3.80 (s, OCH<sub>3</sub>); <sup>13</sup>C NMR (CDCl<sub>3</sub>) δ 23.7 (CH<sub>3</sub>C(O)), 30.8 (NCH<sub>2</sub>CH), 34.4 (CH<sub>2</sub>CHN), 52.8 (OCH<sub>3</sub>), 168.8 (C(O)O), 180.5 (C(O)N); *M<sub>r</sub>* (+ESI) 166.0474 [M+Na]<sup>+</sup> (calcd for C<sub>6</sub>H<sub>9</sub>NO<sub>3</sub>Na<sup>+</sup> 166.0480 [M+Na]<sup>+</sup>).

**(R)-N-Benzyl 2-Acetamido-3-(prop-2-ynoxy)propionamide ((R)-28).** Utilizing Method C, (*R*)-**19** (1.28 g, 6.92 mmol), NMM (1.14 mL, 10.38 mmol), IBCF (1.14 mL, 8.72 mmol), and benzylamine (0.90 mL, 8.30 mmol) gave 1.15 g (61%) of (*R*)-**28** as a white solid: mp 149.0–149.5 °C; [α]<sub>D</sub><sup>25</sup> –26.8° (c 1.5, CHCl<sub>3</sub>); *R<sub>f</sub>* = 0.45 (1/9 MeOH/CHCl<sub>3</sub>); IR (nujol mull) 3263, 2925, 2111, 1639, 1553, 1459 cm<sup>-1</sup>; <sup>1</sup>H NMR (CDCl<sub>3</sub>) δ 2.04 (s, CH<sub>3</sub>C(O)), 2.45 (t, *J* = 2.4 Hz, CH<sub>2</sub>CCH), 3.64 (dd, *J* = 7.4, 9.3 Hz, CHH'OCH<sub>2</sub>), 3.94 (dd, *J* = 3.9, 9.3 Hz, CHH'OCH<sub>2</sub>), 4.15 (1/2HH'<sub>q</sub>, *J* = 2.4, 15.9 Hz, OCHH'C), 4.23 (1/2HH'<sub>q</sub>, *J* = 2.4, 15.9 Hz, OCHH'C), 4.45 (1/2HH'<sub>q</sub>, *J* = 6.0, 15.0 Hz, CHH'Ph), 4.51 (1/2HH'<sub>q</sub>, *J* = 6.0, 15.0 Hz, CHH'Ph), 4.57–4.63 (m, CH), 6.43–6.45 (br d, *J* = 6.6 Hz, NHCH), 6.65–6.73 (br m, NHCH<sub>2</sub>), 7.25–7.37 (m, C<sub>6</sub>H<sub>5</sub>), addition of excess (*R*)-(-)-mandelic acid to a CDCl<sub>3</sub> solution of (*R*)-**28** gave only a single signal for the acetyl methyl protons and the alkyne proton, addition of excess (*R*)-(-)-mandelic acid to a CDCl<sub>3</sub> solution of (*R*)-**28** and (*S*)-**28** (3:5 ratio) gave two signals for the acetyl methyl protons (δ 2.005 (*R*) and 2.020 (*S*) (Δppm = 0.015)), and two signals for the alkyne proton (δ 2.391 (*S*) and 2.432 (*R*) (Δppm = 0.041)); <sup>13</sup>C NMR (CDCl<sub>3</sub>) δ 23.3 (CH<sub>3</sub>C(O)), 43.8 (CH<sub>2</sub>Ph), 52.7 (CH), 58.8 (CH<sub>2</sub>CCH), 69.3 (CH<sub>2</sub>OCH<sub>2</sub>), 75.5 (CH<sub>2</sub>CCH), 79.0 (CH<sub>2</sub>CCH), 127.7, 128.9, 138.0 (C<sub>6</sub>H<sub>5</sub>), 169.8, 170.5 (2 C(O)), the remaining aromatic signal was not detected; *M<sub>r</sub>* (+ESI) 275.1389 [M+H]<sup>+</sup> (calcd for C<sub>15</sub>H<sub>18</sub>N<sub>2</sub>O<sub>3</sub>H<sup>+</sup> 275.1396 [M+H]<sup>+</sup>). Anal. (C<sub>15</sub>H<sub>18</sub>N<sub>2</sub>O<sub>3</sub>): C, H, N.

**(S)-N-Benzyl 2-Acetamido-3-(prop-2-ynoxy)propionamide ((S)-28).** Utilizing the procedure and work up procedure for (*R*)-**28**, and using (*S*)-**19** (1.30 g, 7.03 mmol), NMM (1.16 mL, 10.55 mmol), IBCF (1.16 mL, 8.86 mmol), and benzylamine (0.92 mL, 8.44 mmol) gave 1.21 g (63%) of (*S*)-**28** as a white solid: mp 148.5–149.0 °C; [α]<sub>D</sub><sup>25</sup> +27.3° (c 1.7, CHCl<sub>3</sub>); *R<sub>f</sub>* = 0.45 (1/9 MeOH/CHCl<sub>3</sub>); IR (nujol mull) 3132, 2924, 2111, 1640, 1552, 1459 cm<sup>-1</sup>; <sup>1</sup>H NMR (CDCl<sub>3</sub>) δ 2.04 (s, CH<sub>3</sub>C(O)), 2.45 (t, *J* = 2.4 Hz, CH<sub>2</sub>CCH), 3.64 (dd, *J* = 7.5, 9.1 Hz, CHH'OCH<sub>2</sub>), 3.94 (dd, *J* = 4.1, 9.1 Hz, CHH'OCH<sub>2</sub>), 4.15 (1/2HH'<sub>q</sub>, *J* = 2.4, 15.9 Hz, OCHH'C), 4.23 (1/2HH'<sub>q</sub>, *J* = 2.4, 15.9 Hz, OCHH'C), 4.45 (1/2HH'<sub>q</sub>, *J* = 6.0,

15.0 Hz, CHH'Ph), 4.51 (1/2HH'<sub>q</sub>, *J* = 6.0, 15.0 Hz, CHH'Ph), 4.57–4.63 (m, CH), 6.43–6.45 (br d, *J* = 6.3 Hz, NHCH), 6.65–6.74 (br m, NHCH<sub>2</sub>), 7.25–7.36 (m, C<sub>6</sub>H<sub>5</sub>), addition of excess (*R*)-(-)-mandelic acid to a CDCl<sub>3</sub> solution of (*S*)-**28** gave only a single signal for the acetyl methyl protons and the alkyne proton, addition of excess (*R*)-(-)-mandelic acid to a CDCl<sub>3</sub> solution of (*R*)-**28** and (*S*)-**28** (3:5 ratio) gave two signals for the acetyl methyl protons ( $\delta$  2.005 (*R*) and 2.020 (*S*) ( $\Delta$ ppm = 0.015)), and two signals for the alkyne proton ( $\delta$  2.391 (*S*) and 2.432 (*R*) ( $\Delta$ ppm = 0.041)); <sup>13</sup>C NMR (CDCl<sub>3</sub>)  $\delta$  23.3 (CH<sub>3</sub>C(O)), 43.7 (CH<sub>2</sub>Ph), 52.7 (CH), 58.8 (CH<sub>2</sub>CCH), 69.4 (CH<sub>2</sub>OCH<sub>2</sub>), 75.4 (CH<sub>2</sub>CCH), 79.1 (CH<sub>2</sub>CCH), 127.6, 127.7, 128.8, 138.0 (C<sub>6</sub>H<sub>5</sub>), 169.9, 170.6 (2 C(O)); *M<sub>r</sub>* (+ESI) 275.1390 [M+H]<sup>+</sup> (calcd for C<sub>15</sub>H<sub>18</sub>N<sub>2</sub>O<sub>3</sub>H<sup>+</sup> 275.1396 [M+H]<sup>+</sup>). Anal. (C<sub>15</sub>H<sub>18</sub>N<sub>2</sub>O<sub>3</sub>): C, H, N.

**2-Azidoethanol.**<sup>7</sup> NaN<sub>3</sub> (70.00 g, 1.08 mol) was dissolved in H<sub>2</sub>O (200 mL) and 2-chloroethanol (55.6 mL, 0.829 mol) was added all at once. The reaction was stirred at 80 °C (24 h) behind a safety shield. After 24 h, the reaction was cooled to room temperature, saturated with NaCl, and extracted with CH<sub>2</sub>Cl<sub>2</sub> (8 x 150 mL). The organic layers were dried (Na<sub>2</sub>SO<sub>4</sub>) and evaporated at room temperature to obtain 58.42 g (81%) of a colorless liquid that was used without further purification: *R<sub>f</sub>* = 0.47 (1/2 EtOAc/hexanes); <sup>1</sup>H NMR (CDCl<sub>3</sub>)  $\delta$  2.62 (t, *J* = 6.7 Hz, CH<sub>2</sub>OH), 3.45 (t, *J* = 5.1 Hz, CH<sub>2</sub>N<sub>3</sub>), 3.78 (app. q, *J* = 5.1 Hz, CH<sub>2</sub>OH); <sup>13</sup>C NMR (CDCl<sub>3</sub>)  $\delta$  53.6 (CH<sub>2</sub>N<sub>3</sub>), 61.4 (CH<sub>2</sub>OH).

**(*R*)-*N*-Benzyl 2-Acetamido-3-(2-azidoethoxy)propionamide ((*R*)-**30**).** Utilizing Method D, (*R*)-**20** (950 mg, 4.4 mmol), benzylamine (622  $\mu$ L, 5.7 mmol), and DMTMM (1.58 g, 5.7 mmol) in THF (50 mL) gave 715 mg (53%) of (*R*)-**30** as a white solid after purification by flash chromatography (4/96 MeOH/CHCl<sub>3</sub>) followed by recrystallization from EtOAc: mp 111–112.5 °C; [ $\alpha$ ]<sub>D</sub><sup>25</sup> +12.0° (c 1.0; MeOH); *R<sub>f</sub>* = 0.51 (5/95 MeOH/CHCl<sub>3</sub>); IR (nujol mull) 3139, 2107, 1635, 1547 cm<sup>-1</sup>; <sup>1</sup>H NMR (CDCl<sub>3</sub>)  $\delta$  1.98 (s, CH<sub>3</sub>C(O)NH), 3.32–3.43 (m, OCH<sub>2</sub>CH<sub>2</sub>N<sub>3</sub>), 3.50–3.56 (m, CHCHH'OCH<sub>2</sub>), 3.58–3.75 (m, OCH<sub>2</sub>CH<sub>2</sub>N<sub>3</sub>), 3.88–3.96 (m, CHCHH'OCH<sub>2</sub>), 4.39–4.51 (m, NHCH<sub>2</sub>Ph), 4.52–4.58 (m, CHCH<sub>2</sub>OCH<sub>2</sub>), 6.55–6.65 (br d, NHCHCH<sub>2</sub>O), 6.76–6.86 (m, NHCH<sub>2</sub>Ph), 7.21–7.35 (C<sub>6</sub>H<sub>5</sub>), addition of excess (*R*)-(-)-mandelic acid to a CDCl<sub>3</sub> solution of (*R*)-**30** gave only one signal for the acetyl protons, addition of excess (*R*)-(-)-mandelic acid to a CDCl<sub>3</sub> solution of (*S*)-**30** and (*R*)-**30** (1:2 ratio) gave two signals for the acetyl protons ( $\delta$  2.006 (*S*) and 1.993 (*R*) ( $\Delta$ ppm = 0.013)); <sup>13</sup>C NMR (CDCl<sub>3</sub>)  $\delta$  23.4 (CH<sub>3</sub>C(O)), 43.9 (NHCH<sub>2</sub>Ph), 50.9 (CH<sub>2</sub>N<sub>3</sub>), 52.7 (CHCH<sub>2</sub>O), 70.3 (OCH<sub>2</sub>CH<sub>2</sub>N<sub>3</sub> or CHCH<sub>2</sub>O), 70.4 (CHCH<sub>2</sub>O or OCH<sub>2</sub>CH<sub>2</sub>N<sub>3</sub>), 127.7, 128.9, 138.0 (C<sub>6</sub>H<sub>5</sub>), 169.8, 170.9 (CH<sub>3</sub>C(O)NH, C(O)NHCH<sub>2</sub>), the remaining aromatic resonance was not detected and is believed to overlap with nearby signals; *M<sub>r</sub>* (+ESI) 328.1380 [M+Na]<sup>+</sup> (calcd for C<sub>14</sub>H<sub>19</sub>N<sub>5</sub>O<sub>3</sub>Na<sup>+</sup> 328.1386 [M+Na]<sup>+</sup>). Anal. (C<sub>14</sub>H<sub>19</sub>N<sub>5</sub>O<sub>3</sub>): C, H, N.

**(*S*)-*N*-Benzyl 2-Acetamido-3-(2-azidoethoxy)propionamide ((*S*)-**30**).** Utilizing the preceding procedure, and using (*S*)-**20** (1.08 g, 5 mmol), benzylamine (600  $\mu$ L, 5.5 mmol) and DMTMM (1.52 g,

5.5 mmol) in THF (50 mL) gave 854 mg (56%) of (*S*)-**30** as a white solid after purification by flash chromatography (4/96 MeOH/CHCl<sub>3</sub>) followed by recrystallization from EtOAc and hexanes: mp 111–112.5 °C;  $[\alpha]_D^{25}$  -12.1° (c 1.0; MeOH);  $R_f$  = 0.51 (5/95 MeOH/CHCl<sub>3</sub>); IR (nujol mull) 3139, 2107, 1635, 1547 cm<sup>-1</sup>; <sup>1</sup>H NMR (CDCl<sub>3</sub>) δ 1.98 (s, CH<sub>3</sub>C(O)NH), 3.32–3.43 (m, OCH<sub>2</sub>CH<sub>2</sub>N<sub>3</sub>), 3.50–3.56 (m, CHCHH'OCH<sub>2</sub>), 3.58–3.75 (m, OCH<sub>2</sub>CH<sub>2</sub>N<sub>3</sub>), 3.88–3.96 (m, CHCHH'OCH<sub>2</sub>), 4.39–4.51 (m, NHCH<sub>2</sub>Ph), 4.52–4.58 (m, CHCH<sub>2</sub>OCH<sub>2</sub>), 6.42–6.52 (br d, NHCHCH<sub>2</sub>O), 6.74–6.84 (br t, NHCH<sub>2</sub>Ph), 7.21–7.35 (C<sub>6</sub>H<sub>5</sub>), addition of excess (*R*)-(-)-mandelic acid to a CDCl<sub>3</sub> solution of (*S*)-**30** gave only one signal for the acetyl protons, addition of excess (*R*)-(-)-mandelic acid to a CDCl<sub>3</sub> solution of (*S*)-**30** and (*R*)-**30** (1:2 ratio) gave two signals for the acetyl protons (δ 2.006 (*S*) and 1.993 (*R*) (Δppm = 0.013)); <sup>13</sup>C NMR (CDCl<sub>3</sub>) δ 23.4 (CH<sub>3</sub>C(O)), 43.9 (NHCH<sub>2</sub>Ph), 50.9 (CH<sub>2</sub>N<sub>3</sub>), 52.7 (CHCH<sub>2</sub>O), 70.3 (OCH<sub>2</sub>CH<sub>2</sub>N<sub>3</sub> or CHCH<sub>2</sub>O), 70.4 (CHCH<sub>2</sub>O or OCH<sub>2</sub>CH<sub>2</sub>N<sub>3</sub>), 127.7, 128.9, 138.0 (C<sub>6</sub>H<sub>5</sub>), 169.8, 170.9 (CH<sub>3</sub>C(O)NH, C(O)NHCH<sub>2</sub>), the remaining aromatic resonance was not detected and is believed to overlap with nearby signals;  $M_r$  (+ESI) 328.1380 [M+Na]<sup>+</sup> (calcd for C<sub>14</sub>H<sub>19</sub>N<sub>5</sub>O<sub>3</sub>Na<sup>+</sup> 328.1386 [M+Na]<sup>+</sup>). Anal. (C<sub>14</sub>H<sub>19</sub>N<sub>5</sub>O<sub>3</sub>): C, H, N.

**Scheme S2.** Synthesis of (*R*)- and (*S*)-**27**

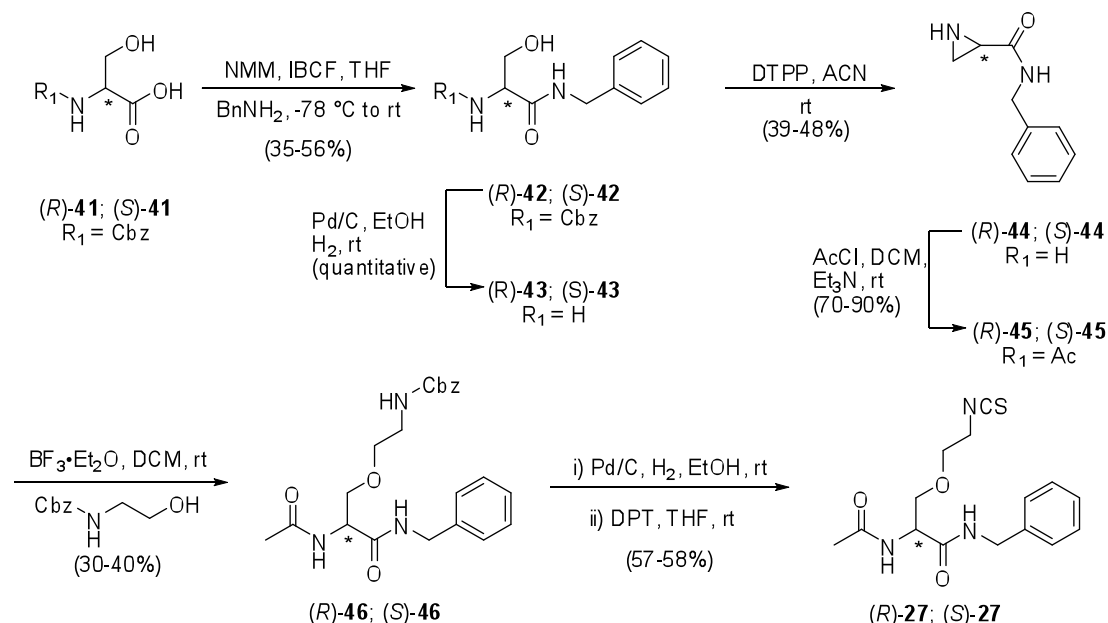

**(*R*)-*N*-Benzyl 2-*N*-(Benzyloxycarbonyl)amino-3-hydroxypropionamide ((*R*)-**42**).**<sup>8</sup> Using Method C, Cbz-D-serine ((*R*)-**41**) (15.00 g, 62.7 mmol), NMM (8.3 mL, 75.2 mmol), IBCF (9.8 mL, 75.2 mmol), and benzylamine (7.60 mL, 69.0 mmol) gave (*R*)-**42** (7.55 g, 35%) as a white solid: mp 147–149 °C (lit.<sup>8</sup> mp 147–149);  $[\alpha]_D^{25} +4.5^\circ$  (c 1.0, MeOH);  $^1\text{H NMR}$  (DMSO-*d*<sub>6</sub>)  $\delta$  3.61 (d,  $J = 5.4$  Hz, CH<sub>2</sub>), 4.06–4.13 (br m, CHCH<sub>2</sub>), 4.29 (d,  $J = 5.4$  Hz, CH<sub>2</sub>N), 4.86–4.93 (br t, OH), 5.04 (s, CH<sub>2</sub>O), 7.23–7.36 (m, 10 ArH), 8.40–8.45 (br m, NH).

**(*S*)-*N*-Benzyl 2-*N*-(Benzyloxycarbonyl)amino-3-hydroxypropionamide ((*S*)-**42**).**<sup>9</sup> Utilizing the preceding procedure, and using Cbz-L-serine ((*S*)-**41**) (15.00 g, 62.7 mmol), NMM (8.3 mL, 75.2 mmol), IBCF (9.8 mL, 75.2 mmol), and benzylamine (7.60 mL, 69.0 mmol) gave (*S*)-**42** (7.55 g, 35%) as a white solid: mp 139–141 °C (lit.<sup>10</sup> mp 148–149.5 °C);  $^1\text{H NMR}$  (DMSO-*d*<sub>6</sub>)  $\delta$  3.56–3.66 (m, CH<sub>2</sub>), 4.07–4.13 (m, CHCH<sub>2</sub>), 4.29 (d,  $J = 5.7$  Hz, CH<sub>2</sub>N), 4.91 (t,  $J = 5.4$  Hz, OH), 5.04 (s, CH<sub>2</sub>O), 7.23–7.38 (m, 10 ArH), 8.40–8.45 (br t, NH).

**(*R*)-*N*-Benzyl Aziridine-2-carboxamide ((*R*)-**44**).** Pd/C (10%, 2.00 g, 20% w/w) was added to a hot ethanolic solution (215 mL) of (*R*)-*N*-benzyl 2-*N*-(benzyloxycarbonyl)amino-3-hydroxypropionamide ((*R*)-**42**) (10.00 g, 30.5 mmol). The solution was stirred at room temperature under H<sub>2</sub> (1 atm) overnight. The mixture was filtered through a bed of Celite<sup>®</sup> and the filtrate was evaporated in vacuo. Acetonitrile (60 mL) was added to the residue followed by DTPP (11.80 g, 33.6 mmol). The mixture was stirred at room temperature (3 h). The reaction was concentrated, aqueous 1

M H<sub>2</sub>SO<sub>4</sub> (100 mL) added, and then washed with toluene (3 x 100 mL). A saturated aqueous solution of Na<sub>2</sub>CO<sub>3</sub> was added to the aqueous layer until pH ~ 8 and then washed with CH<sub>2</sub>Cl<sub>2</sub> (5 x 100 mL). The organic layers were combined and concentrated in vacuum. The solid was purified by silica gel column chromatography (7/3 EtOAc/acetone) to obtain 1.83 g of a white solid (48%): *R<sub>f</sub>* = 0.30 (EtOAc); mp 71–72 °C; [ $\alpha$ ]<sub>D</sub><sup>25</sup> +18.8° (c 1.0, DMSO); IR (nujol mull) 3219, 1662, 1556, 1458, 1377, 1245, 1157, 1024, 912, 833, 729 cm<sup>-1</sup>; <sup>1</sup>H NMR (CDCl<sub>3</sub>)  $\delta$  1.10–1.25 (br m, NH), 1.82 (d, *J* = 2.6 Hz, H<sub>1</sub>), 1.94 (d, *J* = 5.7 Hz, H<sub>1</sub>'), 2.50 (dd, *J* = 2.6, 5.7 Hz, H<sub>2</sub>), 4.44 (d, *J* = 5.7 Hz, NCH<sub>2</sub>), 6.50–6.70 (br m, NH), 7.25–7.37 (m, C<sub>6</sub>H<sub>5</sub>); <sup>13</sup>C NMR (CDCl<sub>3</sub>)  $\delta$  26.5 (NCH<sub>2</sub>), 30.5 (C<sub>1</sub>), 43.1 (br, C<sub>2</sub>), 127.6, 127.8, 128.7, 137.9 (4 ArC), 170.8 (C(O)); *M<sub>r</sub>* (+ESI) 177.1023 [M+H]<sup>+</sup> (calcd for C<sub>10</sub>H<sub>12</sub>N<sub>2</sub>OH<sup>+</sup> 177.1028 [M+H]<sup>+</sup>). Anal. (C<sub>10</sub>H<sub>12</sub>N<sub>2</sub>O•0.1H<sub>2</sub>O): C, H, N.

**(S)-N-Benzyl Aziridine-2-carboxamide ((S)-44).**<sup>9</sup> Utilizing the preceding procedure, and using (S)-N-benzyl 2-N-(benzyloxycarbonyl)amino-3-hydroxypropionamide ((S)-42) (7.00 g, 21.3 mmol), Pd/C 10% (1.40 g, 20% w/w), DTPP (8.30 g, 23.46 mmol), EtOH (150 mL), and acetonitrile (42 mL) gave 1.83 g (48%) of a white solid: *R<sub>f</sub>* = 0.30 (EtOAc); mp 72–73 °C (lit.<sup>9</sup> mp 68 °C); [ $\alpha$ ]<sub>D</sub><sup>25</sup> –18.4° (c 1.0, DMSO); IR (nujol mull) 3215, 1662, 1557, 1458, 1392, 1245, 1157, 1093, 1023, 912, 832, 732 cm<sup>-1</sup>; <sup>1</sup>H NMR (CDCl<sub>3</sub>)  $\delta$  0.9–1.4 (m, NH), 1.77–1.82 (br, H<sub>1</sub>), 1.84 (d, *J* = 5.4 Hz, H<sub>1</sub>'), 2.40–2.45 (br m, H<sub>2</sub>), 4.39 (d, *J* = 5.7 Hz, NCH<sub>2</sub>), 6.90–7.10 (br m, CONH), 7.22–7.37 (m, 5 ArH); *M<sub>r</sub>* (+ESI) 177.1023 [M+H]<sup>+</sup> (calcd for C<sub>10</sub>H<sub>12</sub>N<sub>2</sub>OH<sup>+</sup> 177.1028 [M+H]<sup>+</sup>). Anal. (C<sub>10</sub>H<sub>12</sub>N<sub>2</sub>O): C, H, N.

**(R)-N-Benzyl 1-Acetylaziridine-2-carboxamide ((R)-45).** To a CH<sub>2</sub>Cl<sub>2</sub> solution (50 mL) of (R)-N-benzyl aziridine-2-carboxamide ((R)-44) (2.00 g, 11.4 mmol) maintained at 0 °C was successively added Et<sub>3</sub>N (3.19 mL, 22.7 mmol) and AcCl (886  $\mu$ L, 12.5 mmol). The mixture was stirred at room temperature (1 h), then aqueous 10% citric acid (75 mL) was added, and the organic layer was separated. The aqueous layer was extracted with CH<sub>2</sub>Cl<sub>2</sub> (2 x 75 mL). The organic layers were combined, and successively washed with aqueous saturated NaHCO<sub>3</sub> (75 mL) and H<sub>2</sub>O (50 mL), dried (MgSO<sub>4</sub>), and concentrated in vacuo. The solid was dissolved in minimal amount of EtOAc and then precipitated by addition of cold hexanes to obtain (R)-45 (2.00 g, 71%) as a white solid: *R<sub>f</sub>* = 0.78 (1/1 acetone/EtOAc); mp 82–83 °C; [ $\alpha$ ]<sub>D</sub><sup>25</sup> = –2.6° (c 1.0, DMSO); IR (nujol mull) 3270, 1692, 1649, 1564, 1458, 1373, 1331, 1249, 1186, 733 cm<sup>-1</sup>; <sup>1</sup>H NMR (CDCl<sub>3</sub>)  $\delta$  2.17 (s, CH<sub>3</sub>C(O)), 2.37 (dd, *J* = 0.9, 3.0 Hz, CHH'), 2.55 (dd, *J* = 0.9, 6.3 Hz, CHH'), 3.08 (dd, *J* = 3.0, 6.3 Hz, CH), 4.38–4.45 (m, CH<sub>2</sub>N), 6.49–6.58 (br m, NCHCO), 7.23–7.38 (m, C<sub>6</sub>H<sub>5</sub>); <sup>13</sup>C NMR (CDCl<sub>3</sub>)  $\delta$  23.5 (CH<sub>3</sub>C(O)), 32.2 (C<sub>1</sub>), 36.6 (C<sub>2</sub>), 43.3 (CH<sub>2</sub>N), 127.6, 127.7, 128.8, 137.5 (ArC), 167.2, 181.3 (2 C(O)); *M<sub>r</sub>* (+ESI) 241.0948 [M+Na]<sup>+</sup> (calcd for C<sub>12</sub>H<sub>13</sub>N<sub>2</sub>O<sub>2</sub>Na<sup>+</sup> 241.0953 [M+Na]<sup>+</sup>). Anal. (C<sub>12</sub>H<sub>13</sub>N<sub>2</sub>O<sub>2</sub>): C, H, N.

**(S)-N-Benzyl 1-Acetylaziridine-2-carboxamide ((S)-45).**<sup>9</sup> Utilizing the preceding procedure, and using (S)-44 (1.37 g, 7.8 mmol), Et<sub>3</sub>N (2.18 mL, 15.6 mmol) and AcCl (606 μL, 8.6 mmol) gave 1.69 g (90%) of (S)-45 as a white solid after precipitation with cold hexanes from ethyl acetate: *R<sub>f</sub>* = 0.78 (1/1 acetone/EtOAc); mp 83–84 °C (lit.<sup>9</sup> mp 72 °C); [α]<sub>D</sub><sup>25</sup> = +3.0° (c 1.0, DMSO); IR (nujol mull) 3267, 1693, 1650, 1562, 1457, 1374, 1331, 1249, 1185, 1050, 733 cm<sup>-1</sup>; <sup>1</sup>H NMR (CDCl<sub>3</sub>) δ 2.14 (s, CH<sub>3</sub>C(O)), 2.37 (dd, *J* = 1.2, 3.0 Hz, CHH'), 2.50 (dd, *J* = 1.2, 6.3 Hz, CHH'), 3.07 (dd, *J* = 3.0, 6.3 Hz, CH), 4.42 (d, *J* = 5.7 Hz, CH<sub>2</sub>N), 6.78–6.85 (m, NHCO), 7.23–7.36 (m, ArH); *M<sub>r</sub>* (+ESI) 241.0948 [M+Na]<sup>+</sup> (calcd for C<sub>12</sub>H<sub>13</sub>N<sub>2</sub>O<sub>2</sub>Na<sup>+</sup> 241.0953 [M+Na]<sup>+</sup>). Anal. (C<sub>12</sub>H<sub>13</sub>N<sub>2</sub>O<sub>2</sub>): C, H, N.

**(R)-N-Benzyl 2-Acetamido-3-(2-amino-N-(benzyloxycarbonyl)ethoxy)propionamide ((R)-46).** Using Method A, (R)-45 (3.10 g, 14.2 mmol), BF<sub>3</sub>•Et<sub>2</sub>O (1.96 mL, 15.6 mmol), and *N*-benzyl 2-hydroxyethylcarbamate (8.33 g, 42.7 mmol) gave 2.40 g (41%) of (R)-46 as a white solid after silica gel column chromatography (5/95 MeOH/EtOAc): *R<sub>f</sub>* = 0.33 (EtOAc); mp 125–126 °C; [α]<sub>D</sub><sup>25</sup> +3.8° (c 1.0, DMSO); IR (nujol mull) 3292, 2726, 1691, 1635, 1540, 1457, 1375, 1263, 1096, 1017, 725 cm<sup>-1</sup>; <sup>1</sup>H NMR (CDCl<sub>3</sub>) δ 2.00 (s, CH<sub>3</sub>C(O)), 3.31–3.40 (m, CH<sub>2</sub>N-Cbz), 3.48–3.57 (m, CH<sub>2</sub>CH<sub>2</sub>O, OCHH'), 3.87 (dd, *J* = 4.2, 9.3 Hz, OCHH'), 4.41–4.47 (m, NCH<sub>2</sub>Ph), 4.50–4.57 (m, CH), 5.05 (s, CH<sub>2</sub>O), 5.12–5.20 (br t, NH), 6.60 (d, *J* = 5.7 Hz, NHC(O)CH<sub>3</sub>), 6.81–6.93 (br t, NH), 7.21–7.35 (m, 2 C<sub>6</sub>H<sub>5</sub>); <sup>13</sup>C NMR (CDCl<sub>3</sub>) δ 22.7 (CH<sub>3</sub>C(O)), 40.5 (CH<sub>2</sub>CH<sub>2</sub>NH), 43.2 (C(O)N(H)CH<sub>2</sub>), 52.7 (OCH<sub>2</sub>CH), 66.5, 70.1, 70.2 (3 OCH<sub>2</sub>), 127.2, 127.3, 127.9, 128.0, 128.3, 128.4, 136.4, 137.8 (8 ArC), 156.6 (OC(O)), 170.0, 170.7 (2 NC(O)); *M<sub>r</sub>* (+ESI) 414.2025 [M+H]<sup>+</sup> (calcd for C<sub>22</sub>H<sub>27</sub>N<sub>3</sub>O<sub>5</sub>H<sup>+</sup> 414.2029 [M+H]<sup>+</sup>). Anal. (C<sub>22</sub>H<sub>27</sub>N<sub>3</sub>O<sub>5</sub>•0.33H<sub>2</sub>O): C, H, N.

**(S)-N-Benzyl 2-Acetamido-3-(2-amino-N-(benzyloxycarbonyl)ethoxy)propionamide ((S)-46).** Utilizing the preceding procedure, and using BF<sub>3</sub>•Et<sub>2</sub>O (2.43 mL, 17.2 mmol), (S)-*N*-benzyl 1-acetylaziridine-2-carboxamide ((S)-45) (3.40 g, 15.6 mmol), and *N*-benzyl 2-hydroxyethylcarbamate (9.00 g, 46.8 mmol) gave 1.81 g (30%) of a white solid: *R<sub>f</sub>* = 0.33 (EtOAc); mp 126.0–126.5 °C; [α]<sub>D</sub><sup>25</sup> –3.3° (c 1.0, DMSO); IR (nujol mull) 3288, 1691, 1635, 1538, 1458, 1375, 1260, 1097, 1017, 908, 699 cm<sup>-1</sup>; <sup>1</sup>H NMR (CDCl<sub>3</sub>) δ 2.00 (s, CH<sub>3</sub>C(O)), 3.32–3.40 (m, CH<sub>2</sub>N-Cbz), 3.51–3.56 (m, CH<sub>2</sub>CH<sub>2</sub>O, OCHH'), 3.86 (dd, *J* = 4.2, 8.7 Hz, OCHH'), 4.38–4.55 (m, NCH<sub>2</sub>Ph, CH), 5.05 (s, CH<sub>2</sub>O), 5.15–5.20 (br m, NH), 6.58–6.62 (br m, NHC(O)CH<sub>3</sub>), 6.82–6.93 (br m, NH), 7.21–7.35 (m, 2 C<sub>6</sub>H<sub>5</sub>); <sup>13</sup>C NMR (CDCl<sub>3</sub>) δ 23.0 (CH<sub>3</sub>C(O)), 40.6 (CH<sub>2</sub>CH<sub>2</sub>NH), 43.5 (C(O)N(H)CH<sub>2</sub>), 52.7 (OCH<sub>2</sub>CH), 66.8, 70.0, 70.5 (3 OCH<sub>2</sub>), 127.5, 127.6, 128.0, 128.1, 128.5, 128.7, 136.4, 137.9 (8 ArC), 156.7 (OC(O)), 169.9, 170.6 (2 NC(O)); *M<sub>r</sub>* (+ESI) 436.1842 [M+Na]<sup>+</sup> (calcd for C<sub>22</sub>H<sub>27</sub>N<sub>3</sub>O<sub>5</sub>Na<sup>+</sup> 436.1848 [M+Na]<sup>+</sup>). Anal. (C<sub>22</sub>H<sub>27</sub>N<sub>3</sub>O<sub>5</sub>•0.25H<sub>2</sub>O): C, H, N.



**(R)-N-Benzyl 2-Acetamido-3-(2-isothiocyanatoethoxy)propionamide ((R)-27).** Pd/C (10%, 0.20 g, 10% w/w) was added to an ethanolic solution (20 mL) of (R)-N-benzyl 2-acetamido-3-(2-amino-N-(benzyloxycarbonyl)ethoxy)propionamide ((R)-46) (2.00 g, 4.9 mmol) and the mixture was stirred at room temperature (12 h) under H<sub>2</sub> (1 atm). The mixture was filtered through a bed of Celite<sup>®</sup> and the filtrate was evaporated in vacuum to obtain a colorless oil. THF (20 mL) was added to the residue followed by di(2-pyridyl) thionocarbonate (DPT) (0.12 g, 4.9 mmol). The solution was stirred at room temperature (12 h), and then the THF was removed. The residue was purified by silica gel column chromatography (1/9 acetone/EtOAc) to obtain 0.76 g of a white solid (57%): *R<sub>f</sub>* = 0.49 (1/9 acetone/EtOAc); mp 131–132 °C; [α]<sub>D</sub><sup>25</sup> +8.1° (c 1.0, DMSO); IR (nujol mull) 3284, 2207, 2105, 1635, 1547, 1458, 1376, 1230, 1128, 1044, 745, 700 cm<sup>-1</sup>; <sup>1</sup>H NMR (CDCl<sub>3</sub>) δ 2.06 (s, CH<sub>3</sub>C(O)), 3.51–3.76 (m, CH<sub>2</sub>NCS, CH<sub>2</sub>CH<sub>2</sub>O, OCHH'), 3.99 (dd, *J* = 3.6, 9.3 Hz, CHH'), 4.41–4.58 (m, NCH<sub>2</sub>Ph), 4.58–4.64 (m, CH), 6.55 (d, *J* = 6.3 Hz, NHC(O)CH<sub>3</sub>), 6.77–6.82 (br t, NH), 7.26–7.37 (m, C<sub>6</sub>H<sub>5</sub>), addition of excess (R)-(-)-mandelic acid to a CDCl<sub>3</sub> solution of (R)-27 gave only one signal for the acetyl protons; <sup>13</sup>C NMR (CDCl<sub>3</sub>) δ 23.2 (CH<sub>3</sub>C(O)), 43.6 (CH<sub>2</sub>CH<sub>2</sub>NH), 45.3 (C(O)N(H)CH<sub>2</sub>), 52.7 (OCH<sub>2</sub>CH), 69.3, 70.2 (2 OCH<sub>2</sub>), 127.5, 127.6, 128.7 (3 ArC), 134.5 (NCS), 137.9 (ArC), 169.6, 170.6 (2 NC(O)); *M<sub>r</sub>* (+ESI) 344.1040 [M+Na]<sup>+</sup> (calcd for C<sub>15</sub>H<sub>19</sub>N<sub>3</sub>O<sub>3</sub>SNa<sup>+</sup> 344.1045 [M+Na]<sup>+</sup>). Anal. (C<sub>15</sub>H<sub>19</sub>N<sub>3</sub>O<sub>3</sub>S•0.2EtOAc): C, H, N, S.

**(S)-N-Benzyl 2-Acetamido-3-(2-isothiocyanatoethoxy)propionamide ((S)-27).** Utilizing the preceding procedure, and using Pd/C (10%, 0.17 g, 10% w/w), ethanol (17 mL), (S)-N-benzyl 2-acetamido-3-(2-amino-N-(benzyloxycarbonyl)ethoxy)propionamide ((S)-46) (1.70 g, 4.1 mmol), THF (17 mL) and di(2-pyridyl) thionocarbonate (DPT) (0.95 g, 4.1 mmol) gave 0.76 g of a white solid (57%): *R<sub>f</sub>* = 0.49 (1/9 acetone/EtOAc); mp 131–132 °C; [α]<sub>D</sub><sup>25</sup> -8.6° (c 1.0, DMSO); IR (nujol mull) 3283, 2206, 2105, 1725, 1635, 1546, 1458, 1375, 1231, 1127, 724 cm<sup>-1</sup>; <sup>1</sup>H NMR (CDCl<sub>3</sub>) δ 2.06 (s, CH<sub>3</sub>C(O)), 3.51–3.74 (m, CH<sub>2</sub>NCS, CH<sub>2</sub>CH<sub>2</sub>O, OCHH'), 3.99 (dd, *J* = 3.6, 9.3 Hz, CHH'), 4.46–4.52 (m, NCH<sub>2</sub>Ph), 4.58–4.63 (m, CH), 6.55 (d, *J* = 6.9 Hz, NHC(O)CH<sub>3</sub>), 6.75–6.85 (br t, NH), 7.26–7.36 (m, C<sub>6</sub>H<sub>5</sub>), addition of excess (R)-(-)-mandelic acid to a CDCl<sub>3</sub> solution of (S)-27 gave only one signal for the acetyl protons; <sup>13</sup>C NMR (CDCl<sub>3</sub>) δ 23.2 (CH<sub>3</sub>C(O)), 43.6 (CH<sub>2</sub>CH<sub>2</sub>NH), 45.3 (C(O)N(H)CH<sub>2</sub>), 52.7 (OCH<sub>2</sub>CH), 69.3, 70.1 (2 OCH<sub>2</sub>), 127.5, 127.6, 128.7 (3 ArC), 134.6 (NCS), 137.9 (ArC), 169.6, 170.6 (2 NC(O)); *M<sub>r</sub>* (+ESI) 344.1039 [M+Na]<sup>+</sup> (calcd for C<sub>15</sub>H<sub>19</sub>N<sub>3</sub>O<sub>3</sub>SNa<sup>+</sup> 344.1045 [M+Na]<sup>+</sup>). Anal. (C<sub>15</sub>H<sub>19</sub>N<sub>3</sub>O<sub>3</sub>S•0.1EtOAc): C, H, N, S.

**Scheme S3. Synthesis of (*R*)- and (*S*)-29**

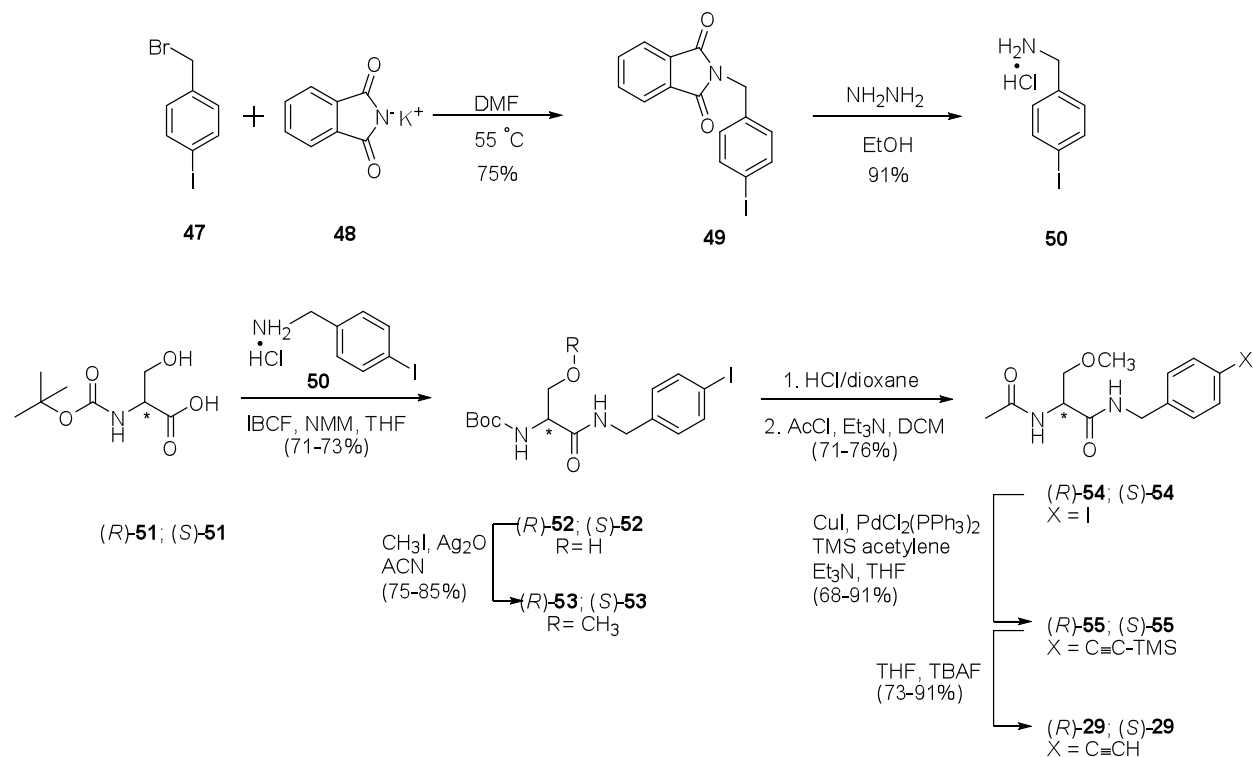

***N*-(4-Iodobenzyl)phthalimide (49).**<sup>11</sup> A mixture of 4-iodobenzylbromide (**47**) (40.00 g, 134.7 mmol), potassium phthalimide (**48**) (26.20 g, 141.5 mmol) and dry DMF (150 mL) was heated overnight at 55 °C under Ar, and then the solvent was removed at reduced pressure. The solid residue was triturated with CHCl<sub>3</sub> (200 mL), filtered, and washed with CHCl<sub>3</sub> (3 x 200 mL). The combined organic extracts were successively washed with aqueous 0.2 M NaOH (200 mL) and H<sub>2</sub>O (400 mL), and then dried (MgSO<sub>4</sub>). The solvent was removed at reduced pressure to afford a crude solid, which was triturated with Et<sub>2</sub>O to obtain a white solid (37.00 g, 75%): *R<sub>f</sub>* = 0.75 (1/1 EtOAc/hexanes); mp 138–139 °C; <sup>1</sup>H NMR (CDCl<sub>3</sub>) δ 4.77 (s, CH<sub>2</sub>), 7.17 (d, *J* = 8.6 Hz, 2 ArH), 7.63 (d, *J* = 8.6 Hz, 2 ArH), 7.78 (dd, *J* = 3.0, 5.7 Hz, 2 PhtH), 7.83 (dd, *J* = 3.0, 5.7 Hz, 2 PhtH); <sup>13</sup>C NMR (CDCl<sub>3</sub>) δ 41.0 (CH<sub>2</sub>), 93.5 (CI), 123.4, 130.6, 131.9, 134.1, 135.9, 137.7 (6 ArC), 167.2 (2 C(O)); *M<sub>r</sub>* (+ESI) 363.9831 [M+H]<sup>+</sup> (calcd for C<sub>17</sub>H<sub>13</sub>NO<sub>2</sub>H<sup>+</sup> 363.9835 [M+H]<sup>+</sup>).

**4-Iodobenzylamine Hydrochloride (50).** An EtOH solution (50 mL) of hydrazine hydrate (7.28 mL, 152.9 mmol) was added to an EtOH solution (800 mL) of *N*-(4-iodobenzyl)phthalimide (**49**) (37.00 g, 101.9 mmol) maintained at reflux under Ar. The solution was stirred at reflux (2.5 h), and then the solvent was removed at reduced pressure. The solid residue was dissolved in CH<sub>2</sub>Cl<sub>2</sub> (200 mL) and treated with aqueous 20% NaOH (200 mL). The aqueous phase was separated, extracted with CHCl<sub>3</sub>

(3 x 300 mL), and the combined organic layers were dried (MgSO<sub>4</sub>) and concentrated in vacuo to afford the free base as an oil.

The free base was converted to the corresponding hydrochloride salt **50** by addition of a 4 M HCl solution in dioxane. The white precipitate was filtered and dried to obtain 25.00 g of **2** (91%): *R<sub>f</sub>* = 0.1 (EtOAc); mp > 250 °C (lit.<sup>12</sup> mp 299–303 °C); <sup>1</sup>H NMR (DMSO-*d*<sub>6</sub>) δ 3.97 (d, *J* = 5.4 Hz, CH<sub>2</sub>), 7.34 (d, *J* = 8.1 Hz, 2 ArH), 7.76 (d, *J* = 8.1 Hz, 2 ArH), 8.50–8.85 (br s, NH<sub>3</sub><sup>+</sup>); *M<sub>r</sub>* (+ESI) 233.9780 [M+H]<sup>+</sup> (calcd for C<sub>17</sub>H<sub>13</sub>NO<sub>2</sub>H<sup>+</sup> 233.9775 [M+H]<sup>+</sup>).

**(*R*)-*N*-(4-Iodo)benzyl 2-*N*-(*tert*-Butoxycarbonyl)amino-3-hydroxypropionamide ((*R*)-**52**).**

Using Method C, Boc-D-serine ((*R*)-**51**) (6.00 g, 29.2 mmol), NMM (3.80 mL, 35.04 mmol), IBCF (4.6 mL, 35.04 mmol) and 4-iodobenzylamine hydrochloride (**50**) (8.65 g, 32.60 mmol) in THF (400 mL) gave 8.97 g (73%) as a white solid: *R<sub>f</sub>* = 0.60 (EtOAc); mp 129–130 °C; [α]<sup>25</sup><sub>D</sub> +0.97° (c 2.8, DMSO); IR (nujol mull) 3327, 1656, 1521, 1458, 1375, 1302, 1244, 1164, 1009 cm<sup>-1</sup>; <sup>1</sup>H NMR (DMSO-*d*<sub>6</sub>) δ 1.39 (s, (CH<sub>3</sub>)<sub>3</sub>C), 3.49–3.60 (br m, CH<sub>2</sub>OH), 3.95–4.01 (br m, CHCH<sub>2</sub>), 4.18–4.31 (m, CH<sub>2</sub>N), 4.86 (br s, OH), 6.68 (d, *J* = 7.8 Hz, BocNH), 7.08 (d, *J* = 8.1 Hz, 2 ArH), 7.64 (d, *J* = 8.1 Hz, 2 ArH), 8.37 (br s, CH<sub>2</sub>NH); <sup>13</sup>C NMR (CDCl<sub>3</sub>) δ 28.2 ((CH<sub>3</sub>)<sub>3</sub>C), 42.8 (NCH<sub>2</sub>), 54.7 (OCH<sub>2</sub>CH), 62.7 (OCH<sub>2</sub>CH), 80.8 ((CH<sub>3</sub>)<sub>3</sub>C), 92.8 (CI), 129.3, 137.5, 137.7 (3 ArC), 156.4 (C(O)), 171.5 (C(O)); *M<sub>r</sub>* (+ESI) 443.0435 [M+Na]<sup>+</sup> (calcd for C<sub>15</sub>H<sub>21</sub>IN<sub>2</sub>O<sub>4</sub>Na<sup>+</sup> 443.0444 [M+Na]<sup>+</sup>). Anal. (C<sub>15</sub>H<sub>21</sub>IN<sub>2</sub>O<sub>4</sub>): C, H, N, I.

**(*S*)-*N*-(4-Iodo)benzyl 2-*N*-(*tert*-Butoxycarbonyl)amino-3-hydroxypropionamide ((*S*)-**52**).**

Utilizing the preceding procedure, and using Boc-L-serine ((*S*)-**51**) (1.72 g, 8.42 mmol), NMM (1.1 mL, 10.10 mmol), IBCF (1.3 mL, 10.10 mmol) and 4-iodobenzylamine hydrochloride (**50**) (2.50 g, 9.26 mmol) gave the desired product that was recrystallized with EtOAc to obtain (*S*)-**52** (2.51 g, 71%) as a white solid: *R<sub>f</sub>* = 0.60 (EtOAc); mp 129–130 °C; [α]<sup>25</sup><sub>D</sub> -0.93° (c 2.8, DMSO); IR (nujol mull) 3324, 1652, 1520, 1373, 1301, 1246, 1163, 1008, 850, 779 cm<sup>-1</sup>; <sup>1</sup>H NMR (DMSO-*d*<sub>6</sub>) δ 1.39 (s, (CH<sub>3</sub>)<sub>3</sub>C), 3.50–3.60 (br m, CH<sub>2</sub>OH), 3.94–4.02 (br m, CHCH<sub>2</sub>), 4.16–4.30 (m, CH<sub>2</sub>N), 4.83–4.87 (br s, OH), 6.68 (d, *J* = 8.1 Hz, BocNH), 7.07 (d, *J* = 8.4 Hz, 2 ArH), 7.64 (d, *J* = 8.4 Hz, 2 ArH), 8.37 (t, *J* = 5.7 Hz, CH<sub>2</sub>NH); <sup>13</sup>C NMR (DMSO-*d*<sub>6</sub>) δ 28.1 ((CH<sub>3</sub>)<sub>3</sub>C), 41.4 (NCH<sub>2</sub>), 56.9 (OCH<sub>2</sub>CH), 61.7 (OCH<sub>2</sub>CH), 78.1 ((CH<sub>3</sub>)<sub>3</sub>C), 92.1 (CI), 129.3, 136.7, 139.3 (C<sub>6</sub>H<sub>4</sub>), 155.1 (C(O)), 170.5 (C(O)); *M<sub>r</sub>* (+ESI) 443.0445 [M+Na]<sup>+</sup> (calcd for C<sub>15</sub>H<sub>21</sub>IN<sub>2</sub>O<sub>4</sub>Na<sup>+</sup> 443.0444 [M+Na]<sup>+</sup>). Anal. (C<sub>15</sub>H<sub>21</sub>IN<sub>2</sub>O<sub>4</sub>): C, H, N, I.

**(*R*)-*N*-(4-Iodo)benzyl 2-*N*-(*tert*-Butoxycarbonyl)amino-3-methoxypropionamide ((*R*)-**53**).**

Ag<sub>2</sub>O (20.63 g, 89.29 mmol) was added to a CH<sub>3</sub>CN solution (300 mL) of (*R*)-*N*-(4-iodo)benzyl 2-*N*-(*tert*-butoxycarbonyl)amino-3-hydroxypropionamide ((*R*)-**52**) (7.50 g, 17.86 mmol) and then CH<sub>3</sub>I (11.12 mL, 178.57 mmol) was added at room temperature under Ar. The reaction mixture was stirred at room temperature (3 d), filtered, and the filtrate concentrated in vacuo. The residue was purified by

silica gel column chromatography (2/3 EtOAc/hexanes) to obtain 5.80 g (75%) of (*R*)-**53** as a white solid after trituration with Et<sub>2</sub>O: *R<sub>f</sub>* = 0.53 (1/1 EtOAc/hexanes); mp 86–87 °C; [ $\alpha$ ]<sub>D</sub><sup>25</sup> –3.4° (c 1.0, DMSO); IR (nujol mull) 3334, 1659, 1528, 1461, 1376, 1303, 1245, 1165, 1110, 1049, 954, 870, 788, 619 cm<sup>-1</sup>; <sup>1</sup>H NMR (CDCl<sub>3</sub>)  $\delta$  1.43 (s, (CH<sub>3</sub>)<sub>3</sub>C), 3.37 (s, OCH<sub>3</sub>), 3.48 (dd, *J* = 6.3, 9.3 Hz, CHH'OCH<sub>3</sub>), 3.84 (dd, *J* = 3.9, 9.3 Hz, CHH'OCH<sub>3</sub>), 4.20–4.28 (br m, CHCH<sub>2</sub>), 4.41 (d, *J* = 5.4 Hz, CH<sub>2</sub>N), 5.37–7.41 (br s, BocNH), 6.75–6.80 (br t, CH<sub>2</sub>NH), 7.01 (d, *J* = 8.2 Hz, 2 ArH), 7.64 (d, *J* = 8.2 Hz, 2 ArH); <sup>13</sup>C NMR (CDCl<sub>3</sub>)  $\delta$  28.2 ((CH<sub>3</sub>)<sub>3</sub>C), 42.8 (NCH<sub>2</sub>), 54.0 (OCH<sub>2</sub>CH), 59.1 (OCH<sub>3</sub>), 71.9 (OCH<sub>2</sub>CH), 80.5 ((CH<sub>3</sub>)<sub>3</sub>C), 92.7 (CI), 129.3, 137.7, 137.8 (3 ArC), 155.5 (C(O)), 170.4 (C(O)); *M<sub>r</sub>* (+ESI) 435.0777 [M+H]<sup>+</sup> (calcd for C<sub>16</sub>H<sub>23</sub>N<sub>2</sub>O<sub>4</sub>H<sup>+</sup> 435.0781 [M+H]<sup>+</sup>). Anal. (C<sub>16</sub>H<sub>23</sub>N<sub>2</sub>O<sub>4</sub>): C, H, N, I.

**(*S*)-*N*-(4-iodo)benzyl 2-*N*-(*tert*-Butoxycarbonyl)amino-3-methoxypropionamide ((*S*)-**53**).**

Utilizing the preceding procedure, and using Ag<sub>2</sub>O (23.40 g, 101.20 mmol), (*S*)-*N*-(4-iodo)benzyl 2-*N*-(*tert*-butoxycarbonyl)amino-3-hydroxypropionamide ((*S*)-**52**) (8.50 g, 20.24 mmol) and CH<sub>3</sub>I (12.60 mL, 202.4 mmol) gave 7.56 g (85%) of a white solid: *R<sub>f</sub>* = 0.53 (1/1 EtOAc/hexanes); mp 87.0–87.5 °C; [ $\alpha$ ]<sub>D</sub><sup>25</sup> +3.3° (c 1.0, DMSO); IR (nujol mull) 3337, 2728, 1657, 1527, 1461, 1376, 1303, 1244, 1164, 1109, 1048, 953, 869, 787, 617 cm<sup>-1</sup>; <sup>1</sup>H NMR (DMSO-*d*<sub>6</sub>)  $\delta$  1.39 (s, (CH<sub>3</sub>)<sub>3</sub>C), 3.24 (s, OCH<sub>3</sub>), 3.47 (d, *J* = 6.0 Hz, CH<sub>2</sub>OCH<sub>3</sub>), 4.14–4.18 (br m, CHCH<sub>2</sub>), 4.20–4.25 (m, CH<sub>2</sub>N), 6.88 (d, *J* = 7.5 Hz, BocNH), 7.05 (d, *J* = 8.2 Hz, 2 ArH), 7.64 (d, *J* = 8.2 Hz, 2 ArH), 8.45 (t, *J* = 6.0 Hz, CH<sub>2</sub>NH); <sup>13</sup>C NMR (DMSO-*d*<sub>6</sub>)  $\delta$  28.0 ((CH<sub>3</sub>)<sub>3</sub>C), 41.4 (NCH<sub>2</sub>), 54.2 (OCH<sub>2</sub>CH), 58.0 (OCH<sub>3</sub>), 71.8 (OCH<sub>2</sub>CH), 78.1 ((CH<sub>3</sub>)<sub>3</sub>C), 92.2 (CI), 129.3, 136.7, 139.2 (3 ArC), 155.1 (C(O)), 170.0 (C(O)); *M<sub>r</sub>* (+ESI) 435.0775 [M+H]<sup>+</sup> (calcd for C<sub>16</sub>H<sub>23</sub>N<sub>2</sub>O<sub>4</sub>H<sup>+</sup> 435.0781 [M+H]<sup>+</sup>). Anal. (C<sub>16</sub>H<sub>23</sub>N<sub>2</sub>O<sub>4</sub>): C, H, N, I.

**(*R*)-*N*-(4-iodo)benzyl 2-Acetamido-3-methoxypropionamide ((*R*)-**54**).** A saturated HCl solution in dioxane (0.5 M, 25.00 mL) was added to (*R*)-*N*-(4-iodo)benzyl 2-*N*-(*tert*-butoxycarbonyl)amino-3-methoxypropionamide ((*R*)-**53**) (5.50 g, 12.67 mmol) at 0 °C and the solution was stirred at room temperature (2 h). The reaction solution was concentrated in vacuo and dried (30 min). CH<sub>2</sub>Cl<sub>2</sub> (30 mL) was added to the residue followed by the successive additions of Et<sub>3</sub>N (10.66 mL, 76.02 mmol) and AcCl (2.70 mL, 38.01 mmol) at 0 °C. The mixture was stirred at room temperature (2 h), aqueous 10% citric acid was added and then the organic layer was separated. The aqueous layer was extracted with CH<sub>2</sub>Cl<sub>2</sub> (2 x 30 mL). The organic layers were combined, washed with aqueous saturated NaHCO<sub>3</sub> (30 mL) and H<sub>2</sub>O (30 mL), dried (MgSO<sub>4</sub>), and concentrated in vacuo. The solid was recrystallized with EtOAc to obtain (*R*)-**54** as a white solid: *R<sub>f</sub>* = 0.76 (1/1 acetone/EtOAc); mp 159–160 °C; [ $\alpha$ ]<sub>D</sub><sup>25</sup> = +3.3° (c 1.0, DMSO); IR (nujol mull) 3279, 1636, 1552, 1457, 1375, 1305, 1139, 725 cm<sup>-1</sup>; <sup>1</sup>H NMR (CDCl<sub>3</sub>)  $\delta$  2.02 (s, CH<sub>3</sub>CO), 3.38 (s, OCH<sub>3</sub>), 3.44 (dd, *J* = 7.2, 9.0 Hz, CHH'), 3.79 (dd, *J* = 4.2, 9.0 Hz, CHH'), 4.38–4.41 (m, CH<sub>2</sub>N), 4.52–4.59 (m, NC(H)CO), 6.46 (br d, *J* = 6.6 Hz, NHC(O)CH<sub>3</sub>), 6.85–6.93 (br t, CH<sub>2</sub>NH), 7.00 (d, *J* = 8.4 Hz, 2 ArH), 7.64 (d, *J* = 8.4 Hz, 2 ArH); <sup>13</sup>C

NMR (CDCl<sub>3</sub>)  $\delta$  23.1 (CH<sub>3</sub>CO), 42.9 (CH<sub>2</sub>N), 52.4 (CHCH<sub>2</sub>), 59.1 (OCH<sub>3</sub>), 71.6 (CH<sub>2</sub>OCH<sub>3</sub>), 92.7 (C<sub>I</sub>), 129.3, 137.7, 139.1 (3 ArC), 170.1, 170.3 (2 C(O));  $M_r$  (+ESI) 399.0177 [M+Na]<sup>+</sup> (calcd for C<sub>13</sub>H<sub>17</sub>IN<sub>2</sub>O<sub>3</sub>Na<sup>+</sup> 399.0182 [M+Na]<sup>+</sup>). Anal. (C<sub>13</sub>H<sub>17</sub>IN<sub>2</sub>O<sub>3</sub>): C, H, N, I.

**(S)-N-(4-iodo)benzyl 2-Acetamido-3-methoxypropionamide ((S)-54).** Utilizing the preceding procedure and, using a saturated HCl solution in dioxane (0.5 M, 17 mL), (S)-N-(4-iodo)benzyl 2-*N*-(*tert*-butoxycarbonyl)amino-3-methoxypropionamide ((S)-53) (3.70 g, 8.52 mmol), Et<sub>3</sub>N (3.6 mL, 25.60 mmol) and AcCl (906  $\mu$ L, 12.30 mmol) gave (S)-54 (2.43 g, 76%) as a white solid:  $R_f$  = 0.76 (1/1 acetone/EtOAc); mp 159–160 °C;  $[\alpha]_D^{25} = -3.2^\circ$  (c 1.0, DMSO); IR (nujol mull) 3278, 1636, 1552, 1458, 1375, 1305, 1138, 725 cm<sup>-1</sup>; <sup>1</sup>H NMR (CDCl<sub>3</sub>)  $\delta$  2.02 (s, CH<sub>3</sub>CO), 3.38 (s, OCH<sub>3</sub>), 3.43 (dd,  $J$  = 7.2, 9.0 Hz, CHH'), 3.79 (dd,  $J$  = 4.2, 9.0 Hz, CHH'), 4.38–4.42 (m, CH<sub>2</sub>N), 4.53–4.59 (m, NC(H)CO), 6.47 (br d,  $J$  = 6.0 Hz, NHC(O)CH<sub>3</sub>), 6.85–6.93 (br t, CH<sub>2</sub>NH), 7.00 (d,  $J$  = 8.4 Hz, 2 ArH), 7.64 (d,  $J$  = 8.4 Hz, 2 ArH); <sup>13</sup>C NMR (DMSO-*d*<sub>6</sub>)  $\delta$  22.4 (CH<sub>3</sub>CO), 41.4 (CH<sub>2</sub>N), 52.5 (CHCH<sub>2</sub>), 58.1 (OCH<sub>3</sub>), 71.9 (CH<sub>2</sub>OCH<sub>3</sub>), 92.2 (C<sub>I</sub>), 129.3, 136.8, 139.1 (3 ArC), 169.3, 169.7 (2 C(O));  $M_r$  (+ESI) 399.0177 [M+Na]<sup>+</sup> (calcd for C<sub>13</sub>H<sub>17</sub>IN<sub>2</sub>O<sub>3</sub>Na<sup>+</sup> 399.0182 [M+Na]<sup>+</sup>). Anal. (C<sub>13</sub>H<sub>17</sub>IN<sub>2</sub>O<sub>3</sub>): C, H, N, I.

**(R)-N-(4-(Trimethylsilyl)ethynyl)benzyl 2-Acetamido-3-methoxypropionamide ((R)-55).** To an anhydrous THF (70 mL) solution of (R)-N-(4-iodo)benzyl 2-acetamido-3-methoxypropionamide ((R)-54) (2.40 g, 6.38 mmol), were sequentially added under Ar, triethylamine (1.79 mL, 12.76 mmol), trimethylsilylacetylene (1.35 mL, 9.57 mmol), dichlorobis(triphenylphosphine)palladium (II) (224 mg, 0.319 mmol), and CuI (121 mg, 0.638 mmol). The mixture was stirred at room temperature (4 h), and then Et<sub>2</sub>O added and the precipitate filtered through a Celite pad. The filtrate was concentrated in vacuo and the residue was purified by flash chromatography on silica gel with EtOAc/MeOH (9/1) as the eluant to obtain (R)-55 (1.50 g, 68%) as a brown solid. To remove the traces of palladium, the solid was treated with 14.00 g of resin scavenger (SPM32, PhosPhonics) in CH<sub>2</sub>Cl<sub>2</sub>. The mixture was stirred at room temperature (2 h) and filtered. The filtrate evaporated under vacuum to give (R)-55:  $R_f$  = 0.41 (EtOAc); mp 126–127 °C;  $[\alpha]_D^{25} = +6.1^\circ$  (c 1.0, DMSO); IR (nujol mull) 3285, 2157, 1641, 1546, 1457, 1375, 1302, 1248, 1130, 975, 862, 723 cm<sup>-1</sup>; <sup>1</sup>H NMR (CDCl<sub>3</sub>)  $\delta$  0.24 (s, (CH<sub>3</sub>)<sub>3</sub>Si), 1.99 (s, CH<sub>3</sub>CO), 3.35 (s, OCH<sub>3</sub>), 3.45 (dd,  $J$  = 7.2, 9.0 Hz, CHH'), 3.75 (dd,  $J$  = 4.2, 9.0 Hz, CHH'), 4.33–4.47 (m, CH<sub>2</sub>N), 4.57–4.62 (m, NC(H)CO), 6.66 (br d,  $J$  = 6.9 Hz, NHC(O)CH<sub>3</sub>), 7.07–7.13 (br t, CH<sub>2</sub>NH), 7.17 (d,  $J$  = 7.9 Hz, 2 ArH), 7.40 (d,  $J$  = 7.9 Hz, 2 ArH); <sup>13</sup>C NMR (CDCl<sub>3</sub>)  $\delta$  -0.1 (TMS), 23.2 (CH<sub>3</sub>CO), 43.2 (CH<sub>2</sub>N), 52.4 (CHCH<sub>2</sub>), 59.1 (OCH<sub>3</sub>), 71.6 (CH<sub>2</sub>OCH<sub>3</sub>), 94.4 (C≡C), 104.7 (C≡C), 122.4, 127.2, 132.3, 138.3 (4 ArC), 170.0, 170.3 (2 C(O));  $M_r$  (+ESI) 369.1605 [M+Na]<sup>+</sup> (calcd for C<sub>18</sub>H<sub>26</sub>N<sub>2</sub>O<sub>3</sub>SiNa<sup>+</sup> 369.1610 [M+Na]<sup>+</sup>). Anal. (C<sub>18</sub>H<sub>26</sub>N<sub>2</sub>O<sub>3</sub>Si): C, H, N.

**(S)-N-(4-(Trimethylsilyl)ethynyl)benzyl 2-Acetamido-3-methoxypropionamide ((S)-55).**

Utilizing the preceding procedure, and using (S)-54 (2.40 g, 6.38 mmol), triethylamine (1.79 mL, 12.76 mmol), CuI (121 mg, 0.638 mmol), dichlorobis(triphenylphosphine)palladium (II) (224 mg, 0.319 mmol), and trimethylsilylacetylene (1.35 mL, 9.57 mmol) gave 1.97 g (91%) of (S)-55 as a brown solid:  $R_f = 0.41$  (EtOAc); mp 126–127 °C;  $[\alpha]_D^{25} = -6.2^\circ$  (c 1.0, DMSO); IR (nujol mull) 3285, 2727, 2157, 1641, 1546, 1457, 1374, 1304, 1250, 1137, 862, 725  $\text{cm}^{-1}$ ;  $^1\text{H}$  NMR (DMSO- $d_6$ )  $\delta$  0.22 (s,  $(\text{CH}_3)_3\text{Si}$ ), 1.87 (s,  $\text{CH}_3\text{CO}$ ), 3.25 (s,  $\text{OCH}_3$ ), 3.44–3.55 (m,  $\text{CH}_2$ ), 4.29 (d,  $J = 5.7$  Hz,  $\text{CH}_2\text{N}$ ), 4.43–4.51 (m,  $\text{NC}(\text{H})\text{CO}$ ), 7.24 (d,  $J = 8.2$  Hz, 2 ArH), 7.40 (d,  $J = 8.2$  Hz, 2 ArH), 8.10 (br d,  $J = 8.1$  Hz,  $\text{NHC}(\text{O})\text{CH}_3$ ), 8.53 (br t,  $J = 6.0$  Hz,  $\text{CH}_2\text{NH}$ );  $^{13}\text{C}$  NMR (DMSO- $d_6$ )  $\delta$  -0.2 (TMS), 22.4 ( $\text{CH}_3\text{CO}$ ), 41.7 ( $\text{CH}_2\text{N}$ ), 52.6 ( $\text{CHCH}_2$ ), 58.1 ( $\text{OCH}_3$ ), 71.9 ( $\text{CH}_2\text{OCH}_3$ ), 93.6 ( $\text{C}=\text{C}$ ), 105.1 ( $\text{C}=\text{C}$ ), 120.0, 127.1, 131.4, 140.4 (4 ArC), 169.3, 169.8 (2 C(O));  $M_r$  (+ESI) 369.1603  $[\text{M}+\text{Na}]^+$  (calcd for  $\text{C}_{18}\text{H}_{26}\text{N}_2\text{O}_3\text{SiNa}^+$  369.1610  $[\text{M}+\text{Na}]^+$ ). Anal. ( $\text{C}_{18}\text{H}_{26}\text{N}_2\text{O}_3\text{Si}$ ): C, H, N.

**(R)-N-(4-Ethynyl)benzyl 2-Acetamido-3-methoxypropionamide ((R)-29).**

A 1 M THF solution of TBAF (8.66 mL, 8.66 mmol) was added to a THF (60 mL) solution of (R)-N-(4-(trimethylsilyl)ethynyl)benzyl 2-acetamido-3-methoxypropionamide ((R)-55) (1.50 g, 4.33 mmol) and then the solution was stirred at room temperature (4 h).  $\text{CH}_2\text{Cl}_2$  (30 mL) and an aqueous 10% citric acid solution (30 mL) were added and the organic layer was separated. The aqueous layer was extracted with  $\text{CH}_2\text{Cl}_2$  (2 x 30 mL). The organic layers were combined, dried ( $\text{MgSO}_4$ ), and concentrated in vacuo. The residue was purified by flash chromatography on silica gel with EtOAc as the eluant to obtain (R)-56 (0.81 g, 68%) as a white solid:  $R_f = 0.41$  (EtOAc); mp 161–162 °C;  $[\alpha]_D^{25} = +4.2^\circ$  (c 0.5, DMSO); IR (nujol mull) 3290, 1634, 1544, 1458, 1375, 1311, 1240, 1197, 1104, 1041, 714  $\text{cm}^{-1}$ ;  $^1\text{H}$  NMR ( $\text{CDCl}_3$ )  $\delta$  2.02 (s,  $\text{CH}_3\text{CO}$ ), 3.07 (s,  $\text{C}\equiv\text{CH}$ ), 3.37 (s,  $\text{OCH}_3$ ), 3.45 (dd,  $J = 7.2$  Hz, 9.3 Hz,  $\text{CHH}'$ ), 3.77 (dd,  $J = 4.5$  Hz, 9.3 Hz,  $\text{CHH}'$ ), 4.36–4.49 (m,  $\text{CH}_2\text{N}$ ), 4.56–4.63 (m,  $\text{NC}(\text{H})\text{CO}$ ), 6.60 (br d,  $J = 6.9$  Hz,  $\text{NHC}(\text{O})\text{CH}_3$ ), 7.01–7.10 (br t,  $\text{CH}_2\text{NH}$ ), 7.20 (d,  $J = 8.2$  Hz, 2 ArH), 7.44 (d,  $J = 8.2$  Hz, 2 ArH), addition of excess (R)-(-)-mandelic acid to a  $\text{CDCl}_3$  solution of (R)-56 gave only on signal for the acetyl protons and the methyl protons;  $^{13}\text{C}$  NMR ( $\text{CDCl}_3$ )  $\delta$  23.1 ( $\text{CH}_3\text{CO}$ ), 43.1 ( $\text{CH}_2\text{N}$ ), 52.5 ( $\text{CHCH}_2$ ), 59.0 ( $\text{OCH}_3$ ), 71.7 ( $\text{CH}_2\text{OCH}_3$ ), 77.3 ( $\text{C}=\text{C}$ ), 82.2 ( $\text{C}=\text{C}$ ), 121.2, 127.3, 132.4, 138.7 (4 ArC), 170.1, 170.4 (2 C(O));  $M_r$  (+ESI) 297.1210  $[\text{M}+\text{Na}]^+$  (calcd for  $\text{C}_{15}\text{H}_{18}\text{N}_2\text{O}_3\text{Na}^+$  297.1215  $[\text{M}+\text{Na}]^+$ ). Anal. ( $\text{C}_{15}\text{H}_{18}\text{N}_2\text{O}_3 \cdot 0.5\text{H}_2\text{O}$ ): C, H, N.

**(S)-N-(4-Ethynyl)benzyl 2-Acetamido-3-methoxypropionamide ((S)-29).**

Utilizing the preceding procedure, and using (S)-55 (50 mg, 0.145 mmol), and TBAF (290  $\mu\text{L}$ , 8.66 mmol) gave 0.75 g (91%) of (S)-56 as a white solid (39 mg, 91%):  $R_f = 0.41$  (EtOAc); mp 159–160 °C;  $[\alpha]_D^{25} = -4.4^\circ$  (c 0.5, DMSO); IR (nujol mull) 3289, 2728, 1635, 1544, 1458, 1375, 1304, 1234, 975, 724  $\text{cm}^{-1}$ ;  $^1\text{H}$  NMR ( $\text{CDCl}_3$ )  $\delta$  2.03 (s,  $\text{CH}_3\text{CO}$ ), 3.07 (s,  $\text{C}\equiv\text{CH}$ ), 3.38 (s,  $\text{OCH}_3$ ), 3.44 (dd,  $J = 7.5, 9.0$  Hz,  $\text{CHH}'$ ),

3.80 (dd,  $J = 4.2, 9.0$  Hz, CHH<sup>β</sup>), 4.41–4.51 (m, CH<sub>2</sub>N), 4.52–4.57 (m, NC(H)CO), 6.46 (br d,  $J = 5.4$  Hz, NHC(O)CH<sub>3</sub>), 6.80–6.92 (br t, CH<sub>2</sub>NH), 7.21 (d,  $J = 8.4$  Hz, 2 ArH), 7.45 (d,  $J = 8.4$  Hz, 2 ArH), addition of excess (*R*)-(-)-mandelic acid to a CDCl<sub>3</sub> solution of (*S*)-**56** gave only one signal for the acetyl protons and the methyl protons; <sup>1</sup>H NMR (DMSO-*d*<sub>6</sub>)  $\delta$  1.87 (s, CH<sub>3</sub>CO), 3.25 (s, OCH<sub>3</sub>), 3.44–3.55 (m, CH<sub>2</sub>), 4.14 (s, C $\equiv$ CH), 4.29 (d,  $J = 6.0$  Hz, CH<sub>2</sub>N), 4.43–4.48 (m, NC(H)CO), 7.25 (d,  $J = 8.4$  Hz, 2 PhH), 7.42 (d,  $J = 8.4$  Hz, 2 PhH), 8.11 (br d,  $J = 7.8$  Hz, NHC(O)CH<sub>3</sub>), 8.52 (br t,  $J = 6.0$  Hz CH<sub>2</sub>NH); <sup>13</sup>C NMR (CDCl<sub>3</sub>) 23.2 (CH<sub>3</sub>C(O)), 43.2 (CH<sub>2</sub>N), 52.5 (CHCH<sub>2</sub>), 59.1 (OCH<sub>3</sub>), 71.7 (CH<sub>2</sub>OCH<sub>3</sub>), 77.3 (C $\equiv$ C), 83.3 (C $\equiv$ C), 121.2, 127.3, 132.4, 138.8 (4 ArC), 170.1, 170.4 (2 C(O)); <sup>13</sup>C NMR (DMSO-*d*<sub>6</sub>) 22.3 (CH<sub>3</sub>C(O)), 41.6 (CH<sub>2</sub>N), 52.4 (CHCH<sub>2</sub>), 58.0 (OCH<sub>3</sub>), 71.8 (CH<sub>2</sub>OCH<sub>3</sub>), 80.2 (C $\equiv$ C), 83.2 (C $\equiv$ C), 119.8, 126.9, 131.3, 140.2 (4 ArC), 169.2, 169.6 (2 C(O)); the HMQC experiment showed a correlation between the  $\delta = 3.07$  ppm in the <sup>1</sup>H NMR (CDCl<sub>3</sub>) and  $\delta = 77.3$  in the <sup>13</sup>C NMR (CDCl<sub>3</sub>) and a correlation between  $\delta = 4.14$  ppm in the <sup>1</sup>H NMR (DMSO-*d*<sub>6</sub>) and  $\delta = 80.2$  in the <sup>13</sup>C NMR (DMSO-*d*<sub>6</sub>);  $M_r$  (+ESI) 297.1212 [M+Na]<sup>+</sup> (calcd for C<sub>15</sub>H<sub>18</sub>N<sub>2</sub>O<sub>3</sub>Na<sup>+</sup> 297.1215 [M+Na]<sup>+</sup>). Anal. (C<sub>15</sub>H<sub>18</sub>N<sub>2</sub>O<sub>3</sub>•0.25H<sub>2</sub>O): C, H, N.

#### Scheme S4. Synthesis of 21

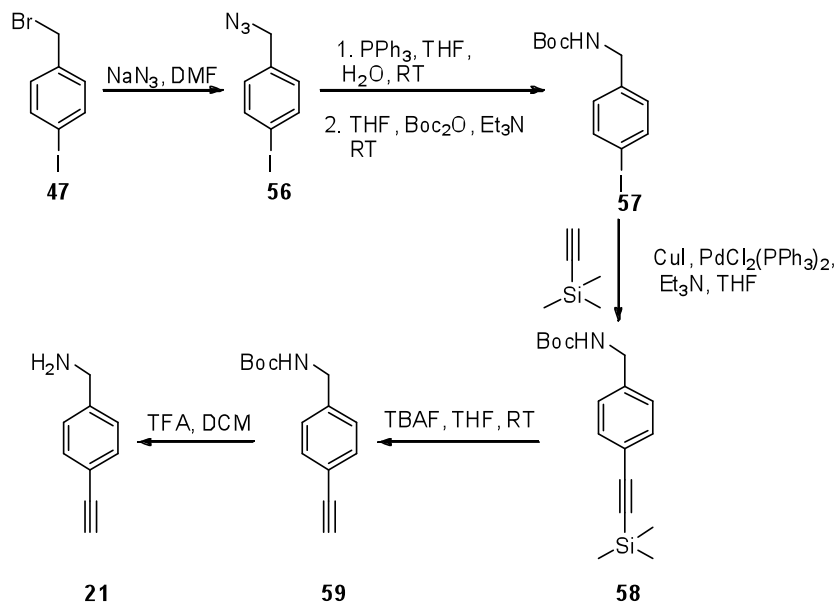

**4-Iodobenzyl Azide (56).**<sup>13</sup> NaN<sub>3</sub> (0.98 g, 15.09 mmol) was added to a solution of 4-iodobenzyl bromide (47) (1.49 g, 5.03 mmol) in DMF (5 mL) and then the mixture was stirred at room temperature (2 h). The reaction was diluted with H<sub>2</sub>O and extracted with EtOAc (5 x 30 mL). The combined organic layers were washed with H<sub>2</sub>O and saturated aqueous brine (30 mL), dried (MgSO<sub>4</sub>), filtered, and the filtrate was concentrated in vacuo. The residue was purified by silica gel column chromatography (1/9 EtOAc/hexanes) to obtain a white solid (1.18 g, 92%): *R*<sub>f</sub> = 0.72 (1/9 EtOAc/hexanes); mp 36 °C (lit.<sup>13</sup> mp 36 °C); <sup>1</sup>H NMR (CDCl<sub>3</sub>) δ 4.29 (s, CH<sub>2</sub>), 7.06 (d, *J* = 8.3 Hz, 2 ArH), 7.70 (d, *J* = 8.3 Hz, 2 ArH); <sup>13</sup>C NMR (CDCl<sub>3</sub>) δ 54.1 (CH<sub>2</sub>), 93.9 (C-I), 129.9, 135.0, 137.9 (3 ArC).

**tert-Butyl N-(4-Iodo)benzyl Carbamate (57).**<sup>13</sup> A THF solution (25 mL) of 56 (1.04 g, 4 mmol) was treated with PPh<sub>3</sub> (1.50 g, 4 mmol) and H<sub>2</sub>O (0.36 g, 20 mmol). The reaction mixture was stirred overnight (room temperature), and then concentrated in vacuo. The residue was dissolved in THF (40 mL) and treated with Et<sub>3</sub>N (1.12 mL, 8 mmol) and di-*tert*-butyl dicarbonate (1.75 mL, 8 mmol). The reaction was stirred at room temperature (3 h), and then H<sub>2</sub>O (25 mL) was added, and the reaction mixture was extracted with EtOAc (3 x 30 mL). The combined organic layers were washed with H<sub>2</sub>O (30 mL) and saturated aqueous brine (30 mL), dried (MgSO<sub>4</sub>), filtered, and the filtrate was concentrated in vacuo. The residue was purified by flash column chromatography on silica gel (3/7 EtOAc/hexanes) to obtain a white solid (0.99 g, 75%): *R*<sub>f</sub> = 0.85 (1/1 EtOAc/hexanes); mp 90 °C (lit.<sup>7</sup> mp 91 °C); <sup>1</sup>H NMR (CDCl<sub>3</sub>) δ 1.45 (s, C(CH<sub>3</sub>)<sub>3</sub>), 4.22 (d, *J* = 6.0 Hz, CH<sub>2</sub>), 5.02 (br s, NH), 7.02 (d, *J*



= 8.1 Hz, 2 ArH), 7.63 (d,  $J = 8.1$  Hz, 2 ArH);  $^{13}\text{C}$  NMR ( $\text{CDCl}_3$ )  $\delta$  28.4 ( $\text{CH}_3$ ), 44.0 ( $\text{CH}_2$ ), 79.6 ( $\text{C}(\text{CH}_3)_3$ ), 92.5 ( $\text{C-I}$ ), 129.3, 137.6, 138.8 (3 ArC), 155.8 ( $\text{C}(\text{O})$ ).

**tert-Butyl N-(4-(Trimethylsilyl)ethynyl)benzyl Carbamate (58).**<sup>13</sup> A THF solution (20 mL) of **57** (666 mg, 2.0 mmol) was treated with (trimethylsilyl)acetylene (0.34 mL, 2.4 mmol),  $\text{Et}_3\text{N}$  (0.56 mL, 4 mmol),  $\text{CuI}$  (38 mg, 0.2 mmol) and dichlorobis(triphenylphosphine)palladium (II) (70 mg, 0.1 mmol) and stirred at room temperature (3 h). The reaction mixture was diluted with  $\text{Et}_2\text{O}$ , filtered through Celite, and the filtrate was concentrated in vacuo. The residue was purified by flash chromatography (1/9 EtOAc/hexanes) to yield **58** (721 mg, 99%) as a yellow solid:  $R_f = 0.48$  (1/9 EtOAc/hexanes); mp 94–95 °C (lit.<sup>7</sup> mp 95 °C);  $^1\text{H}$  NMR ( $\text{CDCl}_3$ )  $\delta$  0.23 (s,  $\text{Si}(\text{CH}_3)_3$ ), 1.44 (s,  $\text{C}(\text{CH}_3)_3$ ), 4.26 (d,  $J = 5.7$  Hz,  $\text{CH}_2$ ), 4.99 (br s, NH), 7.18 (d,  $J = 8.1$  Hz, 2 ArH), 7.40 (d,  $J = 8.1$  Hz, 2 ArH);  $^{13}\text{C}$  NMR ( $\text{CDCl}_3$ )  $\delta$  0.00 ( $\text{Si}(\text{CH}_3)_3$ ), 28.4 ( $\text{C}(\text{CH}_3)_3$ ), 44.4 ( $\text{CH}_2$ ), 79.8 ( $\text{C}(\text{CH}_3)_3$ ), 94.1 ( $\text{C}\equiv\text{C}$ ), 104.9 ( $\text{C}\equiv\text{C}$ ), 122.1, 127.2, 132.2, 139.5 (4 ArC), 155.9 ( $\text{C}(\text{O})$ ).

**tert-Butyl N-(4-Ethynylbenzyl)carbamate (59).**<sup>13</sup> A THF solution (10 mL) of **58** (530 mg, 1.75 mmol) was treated with a 1.0 M solution of TBAF in THF (3.5 mL, 3.50 mmol) and stirred at room temperature (1 h). After evaporation, the residue was purified by flash chromatography (15/85 EtOAc/hexanes) to yield **59** (344 mg, 80%) as a white solid: mp 83 °C (lit.<sup>1</sup> mp 82 °C);  $R_f = 0.49$  (15/85 EtOAc/hexanes);  $^1\text{H}$  NMR ( $\text{CDCl}_3$ )  $\delta$  1.46 (s,  $\text{C}(\text{CH}_3)_3$ ), 3.06 (s,  $\text{C}\equiv\text{CH}$ ), 4.30 (d,  $J = 6.0$  Hz,  $\text{CH}_2$ ), 4.91 (br s, NH), 7.23 (d,  $J = 8.1$  Hz, 2 ArH), 7.45 (d,  $J = 8.1$  Hz, 2 ArH);  $^{13}\text{C}$  NMR ( $\text{CDCl}_3$ )  $\delta$  28.8 ( $\text{C}(\text{CH}_3)_3$ ), 44.8 ( $\text{CH}_2$ ), 80.1 ( $\text{C}(\text{CH}_3)_3$ ), 83.9 ( $\text{C}\equiv\text{C}$ ), 98.3 ( $\text{C}\equiv\text{C}$ ), 121.5, 127.7, 132.8, 140.3 (4 ArC), 156.3 ( $\text{C}(\text{O})$ ).

**N-(4-Ethynylbenzyl)amine (21).**<sup>13</sup> A  $\text{CH}_2\text{Cl}_2$  solution (60 mL) of **59** (2.80 g, 12.1 mmol) at 0 °C was treated with trifluoroacetic acid (12 mL), and then stirred at room temperature (1 h). The solution was evaporated, and aqueous saturated  $\text{Na}_2\text{CO}_3$  (100 mL) added, and extracted with  $\text{CHCl}_3$  (3 x 150 mL). The organics layers were combined, dried ( $\text{MgSO}_4$ ), filtered, and concentrated in vacuum to obtain **21** as a brown oil (1.40 g, 88%):  $^1\text{H}$  NMR ( $\text{CDCl}_3$ )  $\delta$  3.05 (s,  $\text{C}\equiv\text{CH}$ ), 3.89 (s,  $\text{CH}_2$ ), 7.28 (d,  $J = 7.6$  Hz, 2 ArH), 7.47 (d,  $J = 7.6$  Hz, 2 ArH);  $^{13}\text{C}$  NMR ( $\text{CDCl}_3$ )  $\delta$  46.2 ( $\text{CH}_2$ ), 83.6 ( $\text{C}\equiv\text{C}$ ), 120.5 ( $\text{C}\equiv\text{C}$ ), 127.0, 127.8, 132.3, 144.1 (ArC).

### Scheme S5. Synthesis of 39

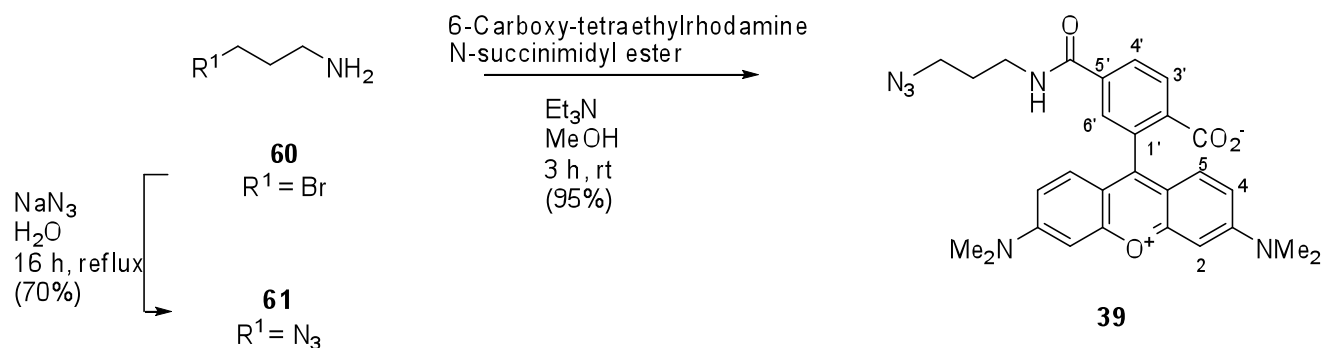

**3-Azido Propylamine (61).**<sup>14</sup> 1-Bromo-3-aminopropane hydrochloride (**60**) (5.00 g, 22.84 mmol) was suspended in  $\text{H}_2\text{O}$  (16 mL) followed by the addition of an aqueous  $\text{NaN}_3$  (4.45 g, 68.5 mmol) solution (23 mL). The mixture was heated to reflux (16 h) and then concentrated to  $\sim 1/3$  volume in vacuo. The resulting mixture was cooled in an ice bath and  $\text{Et}_2\text{O}$  (50 mL) and KOH pellets (6.24 g) were added while keeping the temperature below  $10^\circ\text{C}$ . The organic layer was separated and the aqueous phase extracted with  $\text{Et}_2\text{O}$  ( $2 \times 50$  mL). The combined organic layer was dried ( $\text{Na}_2\text{SO}_4$ ) and concentrated in vacuo, and then purified by bulb-to-bulb distillation to give 1.60 g (70%) of **61** as a yellow oil:  $R_f = 0.60$  (3/97  $\text{NH}_4\text{OH}/\text{EtOH}$ ); IR (nujol mull) 2933, 2864, 2098, 1595, 1459  $\text{cm}^{-1}$ ;  $^1\text{H}$  NMR ( $\text{DMSO}-d_6$ )  $\delta$  1.54–1.63 (m,  $\text{CH}_2\text{CH}_2\text{CH}_2$ ), 2.59 (t,  $J = 6.6$  Hz,  $\text{CH}_2\text{NH}_2$ ), 3.37 (t,  $J = 6.8$  Hz,  $\text{N}_3\text{CH}_2$ );  $^{13}\text{C}$  NMR ( $\text{DMSO}-d_6$ )  $\delta$  32.2 ( $\text{CH}_2\text{CH}_2\text{CH}_2$ ), 38.7 ( $\text{CH}_2\text{NH}_2$ ), 48.5 ( $\text{N}_3\text{CH}_2$ ).

**Rhodamine-azide (39).**<sup>15</sup> 6-Carboxytetramethylrhodamine succinimidyl ester (Berry & Associate. Cat. No. FT 6230, 10.0 mg, 18.96  $\mu\text{mol}$ ) was dissolved in MeOH (1 mL), and 3-azido propylamine (**61**) (11.4 mg, 113.74  $\mu\text{mol}$ ), and triethylamine (13.3  $\mu\text{L}$ , 94.78  $\mu\text{mol}$ ) were added to the stirred solution at room temperature. After 3 h, the solvent was evaporated in vacuo, and the crude product purified by silica gel column chromatography (1/4 MeOH/ $\text{CHCl}_3$ ) to give the desired product along with some starting amine. The product was dissolved in aqueous 1% citric acid (15 mL) and extracted with  $\text{CHCl}_2$  ( $3 \times 20$  mL). The organic extracts were combined, washed with saturated aqueous brine (15 mL), and dried ( $\text{Na}_2\text{SO}_4$ ) to yield 9.2 mg (95%) of **39** as a dark red solid:  $R_f = 0.40$  (1/4 MeOH/ $\text{CHCl}_3$ );  $^1\text{H}$  NMR ( $\text{CD}_3\text{OD}$ )  $\delta$  1.82–1.91 (m,  $\text{CH}_2\text{CH}_2\text{CH}_2$ ), 3.40 (t,  $J = 6.6$  Hz,  $\text{CH}_2\text{NH}_2$ ), 3.46 (t,  $J = 6.9$  Hz,  $\text{N}_3\text{CH}_2$ ), 6.93 (d,  $J = 2.6$  Hz, 2 C(2)H), 7.02 (dd,  $J = 2.6, 9.6$  Hz, 2 C(4)H), 7.26 (d,  $J = 9.6$  Hz, 2 C(5)H), 7.71 (d,  $J = 1.8$  Hz, C(6')H), 8.08 (dd,  $J = 1.8, 8.2$  Hz, C(4')H), 8.14 (d,  $J = 8.2$  Hz, C(3')H).

**Scheme S6. Synthesis of 40**

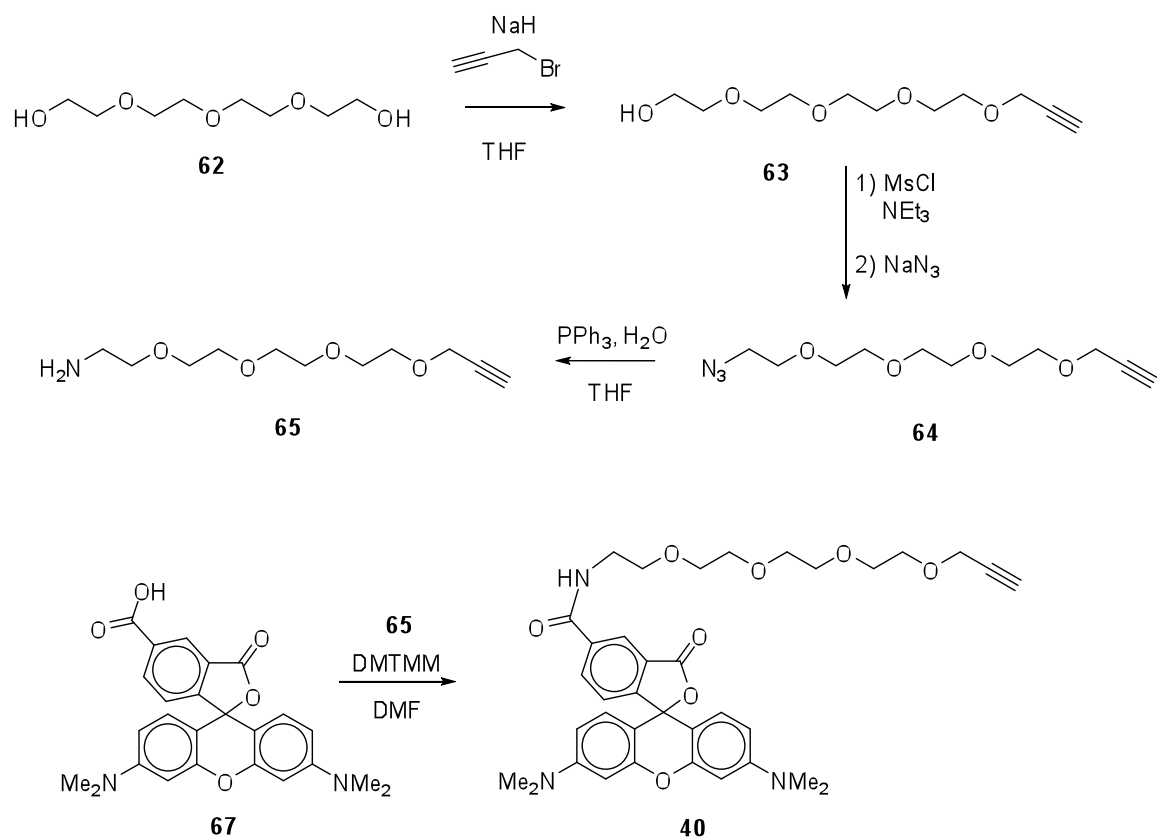

**3,6,9,12-Tetraoxapentadec-14-yn-1-ol (63).**<sup>16</sup> Tetraethylene glycol (**62**) (2.00 g, 10.3 mmol) was dissolved in THF (50 mL) and cooled at 0 °C (ice bath). NaH (60% suspension in oil, 272 mg, 11.34 mmol) was added and the suspension was stirred at 0 °C (15 min). Propargyl bromide (80% wt in toluene, 1.68 mL, 11.34 mmol) was then added dropwise at 0 °C. The suspension was warmed to room temperature and stirred at room temperature (1 h). The salts were removed by filtration, the filtrate concentrated in vacuo, and purified by flash chromatography to yield **63** as a colorless oil (642 mg, 27%):  $R_f = 0.58$  (1/9 MeOH/CHCl<sub>3</sub>); <sup>1</sup>H NMR (CDCl<sub>3</sub>)  $\delta$  2.44 (t,  $J = 2.2$  Hz, OCH<sub>2</sub>CCH), 2.68 (t,  $J = 6.3$  Hz, CH<sub>2</sub>OH), 3.58–3.64 (m, CH<sub>2</sub>OH), 3.64–3.76 (m, 3 CH<sub>2</sub>OCH<sub>2</sub>, CH<sub>2</sub>OCH<sub>2</sub>CCH), 4.21 (d,  $J = 2.2$  Hz, CH<sub>2</sub>CCH); <sup>13</sup>C NMR (CDCl<sub>3</sub>)  $\delta$  58.6 (CH<sub>2</sub>CCH), 61.9 (CH<sub>2</sub>OH), 69.3, 70.5, 70.6, 70.7, 70.8, 70.9, 72.7 (7 OCH<sub>2</sub>), 74.7 (CH<sub>2</sub>CCH), 79.8 (CH<sub>2</sub>CCH).

**1-Azido-3,6,9,12-tetraoxapentadec-14-yne (64).** Compound **63** (624 mg, 2.69 mmol) was dissolved in THF (25 mL) and NEt<sub>3</sub> (450  $\mu$ L, 3.22 mmol) was added and then mesyl chloride (250  $\mu$ L, 3.22 mmol) was added dropwise, while stirring at room temperature (water bath). The reaction was stirred (45 min), the salts filtered, and the filtrate concentrated in vacuo. The residue was dissolved in

CH<sub>2</sub>Cl<sub>2</sub> (25 mL), successively washed with aqueous 10% citric acid (25 mL) and brine (25 mL), dried (Na<sub>2</sub>SO<sub>4</sub>) and evaporated to dryness. The crude mesylated product was obtained as an oil (788 mg, 2.54 mol, 94%) and directly dissolved in DMF (10 mL). NaN<sub>3</sub> was added (214 mg, 3.3 mmol) and the reaction was heated at 60 °C (18 h). After cooling to room temperature, H<sub>2</sub>O (90 mL) was added, and then the reaction mixture was extracted with Et<sub>2</sub>O (3 x 100 mL). The combined organic layers were successively washed with H<sub>2</sub>O (2 x 50 mL), brine (50 mL), and dried (Na<sub>2</sub>SO<sub>4</sub>). The solvents were removed under vacuum to yield **64** as pale yellow oil (400 mg, 61%) that was used without further purification: *R*<sub>f</sub> = 0.46 (5/95 MeOH/CH<sub>2</sub>Cl<sub>2</sub>); IR (neat) 3251, 2869, 2106, 1454, 1531, 1293, 1107 cm<sup>-1</sup>; <sup>1</sup>H NMR (CDCl<sub>3</sub>) δ 2.44 (t, *J* = 2.2 Hz, OCH<sub>2</sub>CCH), 3.41 (t, *J* = 5.1 Hz, CH<sub>2</sub>N<sub>3</sub>), 3.62–3.74 (m, 3 CH<sub>2</sub>OCH<sub>2</sub>, CH<sub>2</sub>OCH<sub>2</sub>CCH), 4.21 (d, *J* = 2.2 Hz, CH<sub>2</sub>CCH); <sup>13</sup>C NMR (CDCl<sub>3</sub>) δ 50.9 (CH<sub>2</sub>N<sub>3</sub>), 58.6 (CH<sub>2</sub>CCH), 69.3, 70.2, 70.5, 70.6, 70.7, 70.8, 70.9 (7 OCH<sub>2</sub>), 74.7 (CH<sub>2</sub>CCH), 79.8 (CH<sub>2</sub>CCH); *M*<sub>r</sub> (+ESI) 296.1012 [M+K]<sup>+</sup> (calcd for C<sub>11</sub>H<sub>19</sub>N<sub>3</sub>O<sub>4</sub>K<sup>+</sup> 296.1013 [M+K]<sup>+</sup>).

**3,6,9,12-Tetraoxapentadec-14-yn-1-amine (65).** Azide **64** (355 mg, 1.38 mmol) was dissolved in THF (20 mL) and PPh<sub>3</sub> (724 mg, 2.74 mmol) was added. Upon dissolution, H<sub>2</sub>O (1 mL) was added to the reaction and the solution was stirred at room temperature (12 h). The solvents were removed in vacuo, the residue was dissolved in aqueous 0.1 M HCl (20 mL), and washed with CH<sub>2</sub>Cl<sub>2</sub> (6 x 80 mL) and EtOAc (2 x 100 mL). The aqueous layer was evaporated to dryness and the remaining salts were suspended in CH<sub>2</sub>Cl<sub>2</sub> (25 mL), vigorously stirred (5 min), and filtered. The cake was extensively rinsed with CH<sub>2</sub>Cl<sub>2</sub>, and the combined organic fractions were evaporated to yield **65** (247 mg, 77%) as a hygroscopic pale yellow oil that was used without further purification: *R*<sub>f</sub> = 0-0.10 (1/9 MeOH/CH<sub>2</sub>Cl<sub>2</sub>); IR (neat) 3367, 2870, 2112, 1661, 1596, 1457, 1353, 1294, 1250 cm<sup>-1</sup>; <sup>1</sup>H NMR (CDCl<sub>3</sub>) δ 1.38–1.56 (br s, CH<sub>2</sub>NH<sub>2</sub>), 2.44 (t, *J* = 2.2 Hz, OCH<sub>2</sub>CCH), 2.87 (t, *J* = 5.4 Hz, CH<sub>2</sub>NH<sub>2</sub>), 3.51 (t, *J* = 5.4 Hz, CH<sub>2</sub>CH<sub>2</sub>NH<sub>2</sub>), 3.60–3.75 (m, 2 CH<sub>2</sub>OCH<sub>2</sub>, CH<sub>2</sub>OCH<sub>2</sub>CCH, CH<sub>2</sub>OCH<sub>2</sub>CH<sub>2</sub>NH<sub>2</sub>), 4.21 (d, *J* = 2.2 Hz, CH<sub>2</sub>CCH); <sup>13</sup>C NMR (CDCl<sub>3</sub>) δ 42.0 (CH<sub>2</sub>NH<sub>2</sub>), 58.6 (CH<sub>2</sub>CCH), 69.3, 70.5, 70.6, 70.7, 70.8, 73.7 (6 OCH<sub>2</sub>), 74.7 (CH<sub>2</sub>CCH), 79.8 (CH<sub>2</sub>CCH), the remaining signal was not detected and is believed to overlap with nearby peaks; *M*<sub>r</sub> (+ESI) 232.1547 [M+K]<sup>+</sup> (calcd for C<sub>11</sub>H<sub>21</sub>NO<sub>4</sub>H<sup>+</sup> 232.1549 [M+K]<sup>+</sup>). Anal. (C<sub>11</sub>H<sub>21</sub>NO<sub>4</sub>•0.35H<sub>2</sub>O): C, H, N.

**Tetramethylrhodamine-PEG-alkyne (40).** Using Method D, 5-carboxytetramethylrhodamine (20 mg, 47 μmol), compound **65** (14 mg, 61 μmol), and DMTMM (17 mg, 61 μmol) in DMF (500 μL) gave **40** as a dark pink residue (10 mg, 33%) after purification by preparative TLC (5/95 to 15/85 MeOH/CH<sub>2</sub>Cl<sub>2</sub>): *R*<sub>f</sub> = 0.25 (1/9 MeOH/CH<sub>2</sub>Cl<sub>2</sub>); <sup>1</sup>H NMR (CD<sub>3</sub>OD) δ 2.85 (t, *J* = 2.4 Hz, OCH<sub>2</sub>CCH), 3.30 (s, 2 N(CH<sub>3</sub>)<sub>2</sub>), 3.60–3.80 (m, 3 CH<sub>2</sub>OCH<sub>2</sub>, NHCH<sub>2</sub>), 4.17 (d, *J* = 2.4 Hz, CH<sub>2</sub>CCH), 6.92–7.08 (m, 2 C(4)H, 2 C(2)H), 7.13–7.28 (m, 2 C(5)H), 7.41 (d, *J* = 8.7 Hz, C(9)H), 8.09 (d, *J* = 8.7 Hz, C(10)H),

8.60–8.75 (br s, C(12)H);  $^{13}\text{C}$  NMR ( $\text{CD}_3\text{OD}$ )  $\delta$  41.0 (2 N(CH<sub>3</sub>)<sub>2</sub>), 41.3 (C(O)NHCH<sub>2</sub>), 59.2 (CH<sub>2</sub>CCH), 70.2, 70.7, 71.4, 71.5, 71.6, 71.7, 71.8 (7 OCH<sub>2</sub>), 76.1 (CH<sub>2</sub>CCH), 80.8 (CH<sub>2</sub>CCH), 97.5, 115.0, 115.2, 129.9, 131.0, 132.7, 137.3, 158.9, 159.2, 162.3, 169.4 (tetramethylrhodamine), the remaining signals were not detected;  $M_r$  (+ESI) 644.2968 [M+H]<sup>+</sup> (calcd for C<sub>36</sub>H<sub>41</sub>N<sub>3</sub>O<sub>8</sub>H<sup>+</sup> 644.2972).

**Table S1.** Quantification of the (R)-9, (S)-9 of the 62kDa using iTRAQ.

| Identified Protein                    | Observed  | Miss | Score                | Peptide                         | Protein   | R    | S    | Average | S.D. |
|---------------------------------------|-----------|------|----------------------|---------------------------------|-----------|------|------|---------|------|
| Dihydropyrimidinase-related protein 2 | 580.2753  | 0    | 54                   | K.SAAEVIAQAR.K                  | CRMP2     | 1.14 | 1.00 | -       | -    |
|                                       | 719.8425  | 0    | 53                   | R.MVIPGGIDVHTR.F                | CRMP2     | 1.60 | 1.00 | -       | -    |
|                                       | 609.6126  | 0    | 33                   | K.IVLEDGTLHVTGSGR.Y             | CRMP2     | 1.46 | 1.00 | -       | -    |
|                                       | 1102.4961 | 0    | 82                   | R.ISVGSADLVIWDPDSVK.T           | CRMP2     | 1.27 | 1.00 | -       | -    |
|                                       | 1219.9767 | 0    | 59                   | R.FQMPDQGMTSADDFQGTK.A          | CRMP2     | 1.35 | 1.00 | -       | -    |
|                                       | 905.0775  | 1    | 47                   | K.AVVTGKMDENQFVAVTSTNAAK.V      | CRMP2     | 1.20 | 1.00 | -       | -    |
|                                       | 1015.4612 | 0    | 77                   | R.ILDLGITGPEGHVLSRPEEVEAEAVNR.S | CRMP2     | 1.43 | 1.00 | 1.35    | 0.16 |
|                                       | 583.7814  | 0    | 40                   | R.MSVIWDK.A                     | CRMP2,3   | 1.40 | 1.00 | -       | -    |
|                                       | 1319.056  | 0    | 62                   | K.IVNDDQSFYADIYMEDGLIK.Q        | CRMP2,3   | 1.37 | 1.00 | 1.36    | 0.14 |
|                                       | 806.4076  | 0    | 72                   | K.QIGENLIVPGGVK.T               | CRMP1,2   | 1.88 | 1.00 | -       | -    |
| 671.9577                              | 0         | 35   | K.MDENQFVAVTSTNAAK.V | CRMP1,2,3                       | 1.21      | 1.00 | 1.39 | 0.21    |      |
| Dihydropyrimidinase-related protein 1 | 572.8043  | 0    | 46                   | K.SAADIALAR.K                   | CRMP1     | 1.33 | 1.00 | -       | -    |
|                                       | 583.7839  | 0    | 40                   | R.MTVVWDK.A                     | CRMP1     | 1.43 | 1.00 | 1.38    | -    |
|                                       | 806.4076  | 0    | 72                   | K.QIGENLIVPGGVK.T               | CRMP1,2   | 1.88 | 1.00 | -       | -    |
|                                       | 671.9577  | 0    | 35                   | K.MDENQFVAVTSTNAAK.I            | CRMP1,2,3 | 1.21 | 1.00 | 1.46    | 0.29 |
| Tubulin alpha chain                   | 923.4354  | 0    | 72                   | R.AVFVDLEPTVIDEVR.T             | TBA       | 0.92 | 1.00 | -       | -    |

**Table S2.** Elemental Analysis of the Synthesized Compounds.

| Compound No. | Formula                                                                                | Calcd. |      |       |      |       | Found |      |       |      |       |
|--------------|----------------------------------------------------------------------------------------|--------|------|-------|------|-------|-------|------|-------|------|-------|
|              |                                                                                        | C      | H    | N     | S    | I     | C     | H    | N     | S    | I     |
| (R)-9        | C <sub>16</sub> H <sub>17</sub> N <sub>3</sub> O <sub>3</sub> S                        | 57.99  | 5.17 | 12.68 | 9.68 |       | 58.04 | 5.18 | 12.47 | 9.61 |       |
| (S)-9        | C <sub>16</sub> H <sub>17</sub> N <sub>3</sub> O <sub>3</sub> S                        | 57.99  | 5.17 | 12.68 | 9.68 |       | 57.77 | 5.14 | 12.44 | 9.55 |       |
| (R)-10       | C <sub>17</sub> H <sub>19</sub> N <sub>3</sub> O <sub>3</sub> S·0.2H <sub>2</sub> O    | 58.50  | 5.60 | 12.04 | 9.19 |       | 58.53 | 5.49 | 12.03 | 8.97 |       |
| (S)-10       | C <sub>17</sub> H <sub>19</sub> N <sub>3</sub> O <sub>3</sub> S·0.16CH <sub>3</sub> OH | 58.74  | 5.67 | 11.95 | 9.12 |       | 59.01 | 5.67 | 12.24 | 8.73 |       |
| (R)-11       | C <sub>15</sub> H <sub>18</sub> N <sub>6</sub> O <sub>3</sub> S                        | 49.71  | 5.01 | 23.19 | 8.85 |       | 49.55 | 4.91 | 23.13 | 8.63 |       |
| (S)-11       | C <sub>15</sub> H <sub>18</sub> N <sub>6</sub> O <sub>3</sub> S                        | 49.71  | 5.01 | 23.19 | 8.85 |       | 49.86 | 5.07 | 23.10 | 8.75 |       |
| (R)-17       | C <sub>9</sub> H <sub>13</sub> NO <sub>4</sub>                                         | 54.26  | 6.58 | 7.03  |      |       | 54.30 | 6.66 | 6.89  |      |       |
| (S)-17       | C <sub>9</sub> H <sub>13</sub> NO <sub>4</sub>                                         | 54.26  | 6.58 | 7.03  |      |       | 54.05 | 6.55 | 6.95  |      |       |
| (R)-19       | C <sub>8</sub> H <sub>11</sub> NO <sub>4</sub> ·0.14H <sub>2</sub> O                   | 51.18  | 6.06 | 7.46  |      |       | 51.15 | 6.13 | 7.27  |      |       |
| (S)-19       | C <sub>8</sub> H <sub>11</sub> NO <sub>4</sub> ·0.25H <sub>2</sub> O                   | 50.66  | 6.11 | 7.38  |      |       | 50.76 | 6.29 | 7.10  |      |       |
| (R)-20       | C <sub>7</sub> H <sub>12</sub> N <sub>4</sub> O <sub>4</sub> ·0.07EtOAc                | 39.30  | 5.69 | 25.23 |      |       | 39.30 | 5.73 | 25.33 |      |       |
| (S)-20       | C <sub>7</sub> H <sub>12</sub> N <sub>4</sub> O <sub>4</sub> ·0.07EtOAc                | 39.30  | 5.69 | 25.23 |      |       | 39.28 | 5.71 | 25.37 |      |       |
| (R)-23       | C <sub>15</sub> H <sub>19</sub> N <sub>3</sub> O <sub>3</sub>                          | 62.27  | 6.62 | 14.52 |      |       | 62.07 | 6.62 | 14.30 |      |       |
| (S)-23       | C <sub>15</sub> H <sub>19</sub> N <sub>3</sub> O <sub>3</sub>                          | 62.27  | 6.62 | 14.52 |      |       | 62.06 | 6.70 | 14.30 |      |       |
| (R)-27       | C <sub>15</sub> H <sub>19</sub> N <sub>3</sub> O <sub>3</sub> S·0.2EtOAc               | 55.99  | 6.10 | 12.50 | 9.54 |       | 55.68 | 5.96 | 12.72 | 9.26 |       |
| (S)-27       | C <sub>15</sub> H <sub>19</sub> N <sub>3</sub> O <sub>3</sub> S·0.1EtOAc               | 56.02  | 6.04 | 12.73 | 9.71 |       | 55.96 | 5.81 | 12.73 | 9.51 |       |
| (R)-28       | C <sub>15</sub> H <sub>18</sub> N <sub>2</sub> O <sub>3</sub>                          | 65.68  | 6.61 | 10.21 |      |       | 65.72 | 6.62 | 10.06 |      |       |
| (S)-28       | C <sub>15</sub> H <sub>18</sub> N <sub>2</sub> O <sub>3</sub>                          | 65.68  | 6.61 | 10.21 |      |       | 65.55 | 6.61 | 10.07 |      |       |
| (R)-29       | C <sub>15</sub> H <sub>18</sub> N <sub>2</sub> O <sub>3</sub> ·0.5H <sub>2</sub> O     | 65.68  | 6.61 | 10.21 |      |       | 65.39 | 6.58 | 10.08 |      |       |
| (S)-29       | C <sub>15</sub> H <sub>18</sub> N <sub>2</sub> O <sub>3</sub> ·0.25H <sub>2</sub> O    | 64.62  | 6.69 | 10.05 |      |       | 64.60 | 6.57 | 9.99  |      |       |
| (R)-30       | C <sub>14</sub> H <sub>19</sub> N <sub>5</sub> O <sub>3</sub>                          | 55.07  | 6.27 | 22.94 |      |       | 54.85 | 6.27 | 22.94 |      |       |
| (S)-30       | C <sub>14</sub> H <sub>19</sub> N <sub>5</sub> O <sub>3</sub>                          | 55.07  | 6.27 | 22.94 |      |       | 55.16 | 6.28 | 22.91 |      |       |
| (R)-38       | C <sub>18</sub> H <sub>25</sub> N <sub>5</sub> O <sub>4</sub>                          | 57.59  | 6.71 | 18.65 |      |       | 57.34 | 6.72 | 18.49 |      |       |
| (R)-44       | C <sub>10</sub> H <sub>12</sub> N <sub>2</sub> O·0.1H <sub>2</sub> O                   | 67.47  | 6.91 | 15.74 |      |       | 67.74 | 6.92 | 15.63 |      |       |
| (S)-44       | C <sub>10</sub> H <sub>12</sub> N <sub>2</sub> O                                       | 68.16  | 6.86 | 15.90 |      |       | 68.40 | 7.03 | 16.05 |      |       |
| (R)-45       | C <sub>12</sub> H <sub>13</sub> N <sub>2</sub> O <sub>2</sub>                          | 66.04  | 6.47 | 12.84 |      |       | 65.91 | 6.45 | 12.75 |      |       |
| (S)-45       | C <sub>12</sub> H <sub>13</sub> N <sub>2</sub> O <sub>2</sub>                          | 66.04  | 6.47 | 12.84 |      |       | 66.15 | 6.56 | 12.72 |      |       |
| (R)-46       | C <sub>22</sub> H <sub>27</sub> N <sub>3</sub> O <sub>5</sub> ·0.33H <sub>2</sub> O    | 62.99  | 6.65 | 10.02 |      |       | 62.74 | 6.55 | 10.01 |      |       |
| (S)-46       | C <sub>22</sub> H <sub>27</sub> N <sub>3</sub> O <sub>5</sub> ·0.25H <sub>2</sub> O    | 63.22  | 6.63 | 10.05 |      |       | 63.16 | 6.56 | 10.21 |      |       |
| (R)-52       | C <sub>15</sub> H <sub>21</sub> IN <sub>2</sub> O <sub>4</sub>                         | 42.87  | 5.04 | 6.67  |      | 30.20 | 43.13 | 5.14 | 6.71  |      | 29.96 |
| (S)-52       | C <sub>15</sub> H <sub>21</sub> IN <sub>2</sub> O <sub>4</sub>                         | 42.87  | 5.04 | 6.67  |      | 30.20 | 43.08 | 5.10 | 6.62  |      | 29.94 |
| (R)-53       | C <sub>16</sub> H <sub>23</sub> IN <sub>2</sub> O <sub>4</sub>                         | 44.25  | 5.34 | 6.45  |      | 29.22 | 44.51 | 5.34 | 6.41  |      | 28.99 |
| (S)-53       | C <sub>16</sub> H <sub>23</sub> IN <sub>2</sub> O <sub>4</sub>                         | 44.25  | 5.34 | 6.45  |      | 29.22 | 44.54 | 5.38 | 6.35  |      | 28.92 |
| (R)-54       | C <sub>13</sub> H <sub>17</sub> IN <sub>2</sub> O <sub>3</sub>                         | 41.51  | 4.55 | 7.45  |      | 33.73 | 41.70 | 4.49 | 7.39  |      | 33.69 |
| (S)-54       | C <sub>13</sub> H <sub>17</sub> IN <sub>2</sub> O <sub>3</sub>                         | 41.51  | 4.55 | 7.45  |      | 33.73 | 41.37 | 4.52 | 7.37  |      | 33.47 |
| (R)-55       | C <sub>18</sub> H <sub>26</sub> N <sub>2</sub> O <sub>3</sub> Si                       | 62.39  | 7.56 | 8.08  |      |       | 62.41 | 7.56 | 7.99  |      |       |
| (S)-55       | C <sub>18</sub> H <sub>26</sub> N <sub>2</sub> O <sub>3</sub> Si                       | 62.39  | 7.56 | 8.08  |      |       | 62.10 | 7.67 | 7.93  |      |       |
| <b>65</b>    | C <sub>11</sub> H <sub>21</sub> NO <sub>4</sub> ·0.35H <sub>2</sub> O                  | 55.60  | 9.21 | 5.89  |      |       | 55.34 | 8.95 | 6.26  |      |       |

## References

1. Bhatia, S.K.; Hajdu, J. A new approach to the synthesis of thioether phospholipids. Preparation of 1-thiohexadecyl-2-*N*-acylaminodeoxyglycerophosphocholines. *Tetrahedron Lett.* **1988**, *29*, 31-34.
2. Larsson, U.; Carlson, R. Synthesis of amino acids with modified principal properties 2: amino acids with polar side chains. *Acta Chem. Scand.* **1994**, *48*, 511-516.
3. Meyer, M.; Telford, J.R.; Cohen, S.M.; White, D.J.; Xu, J.; Raymond, K.N. High-yield synthesis of the enterobactin trilactone and evaluation of derivative siderophore analogs<sup>1</sup>. *J. Am. Chem. Soc.* **1997**, *119*, 10093-10103.
4. Kato, S.; Harada, H.; Morie, T. Efficient synthesis of (6*R*)-6-amino-1-methyl-4-(3-methylbenzyl)hexahydro-1*H*-1,4-diazepine from methyl (2*R*)- and (2*S*)-1-benzyloxycarbonylaziridine-2-carboxylates. *J. Chem. Soc., Perkin Trans. 1.* **1997**, *21*, 3219-3226.
5. Smrt, J.; Beranek, J.; Sicher, J.; Skoda, J.; Hess, V.F.; Sorm, F. Synthesis of L-4-amino-3-isoxazolidinone, the unnatural stereoisomer of cycloserine and its antibiotic activity. *Experientia.* **1957**, *13*, 291.
6. Davoli, P.; Forni, A.; Moretti, I.; Prati, F. Stereochemistry of nucleophilic ring-opening reactions of optically active *N*-acetyl-2-methoxycarbonylaziridine. *Tetrahedron: Asymmetry.* **1995**, *6*, 2011-2016.
7. Pfändler, H.R.; Weimar, V. Synthesis of racemic ethanolamine plasmalogen. *Synthesis.* **1996**, *11*, 1345-1349.
8. Andurkar, S.V.; Stables, J.P.; Kohn, H. Synthesis and anticonvulsant activities of (*R*)-(O)-methylserine derivatives. *Tetrahedron: Asymmetry.* **1998**, *9*, 3841-3854.
9. Galonic, D.P.; van der Donk, W.A.; Gin, D.Y. Site-selective conjugation of thiols with aziridine-2-carboxylic acid-containing peptides. *J. Am. Chem. Soc.* **2004**, *126*, 12712-12713.
10. LeTiran, A.; Stables, J.P.; Kohn, H. Design and evaluation of affinity labels of functionalized amino acid anticonvulsants. *J. Med. Chem.* **2002**, *45*, 4762-73.
11. Brown, S.; Grigg, R.; Hinsley, J.; Korn, S.; Sridharan, V.; Uttley, M.D. Three-component Heck-Diels-Alder cascade processes involving alkylallenes, aryl iodides and dienophiles. *Tetrahedron.* **2001**, *57*, 10347-10355.
12. Aldrich data.
13. Lee, J.; Kang, S.; Lim, J.; Choi, H.; Jin, M.; Toth, A.; Pearce, L.V.; Tran, R.; Wang, Y.; Szabo, T.; Blumberg, P.M. *N*-[4-(Methylsulfonylamino)benzyl]thiourea analogues as vanilloid receptor antagonists: analysis of structure-activity relationships for the "C-Region". *Bioorg. Med. Chem.* **2004**, *12*, 371-385.



14. Carboni, B.; Benalil, A.; Vaultier, M. Aliphatic amino azides as key building blocks for efficient polyamine syntheses. *J. Org. Chem.* **1993**, *58*, 3736-3741.
15. Speers, A.E.; Cravatt, B.F. Profiling enzyme activities in vivo using click chemistry methods. *Chem. Biol.* **2004**, *11*, 535-46.
16. Sun, X.; Stabler, C.; Cazalis, C.; Chaikof, E. Carbohydrate and protein immobilization onto solid surfaces by sequential Diels-Alder and azide-alkyne cycloadditions. *Bioconjugate Chem.* **2006**, *17*, 52-57.

W: Water  
X: Impurity  
S: Solvent

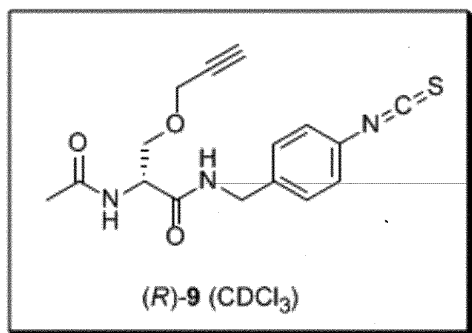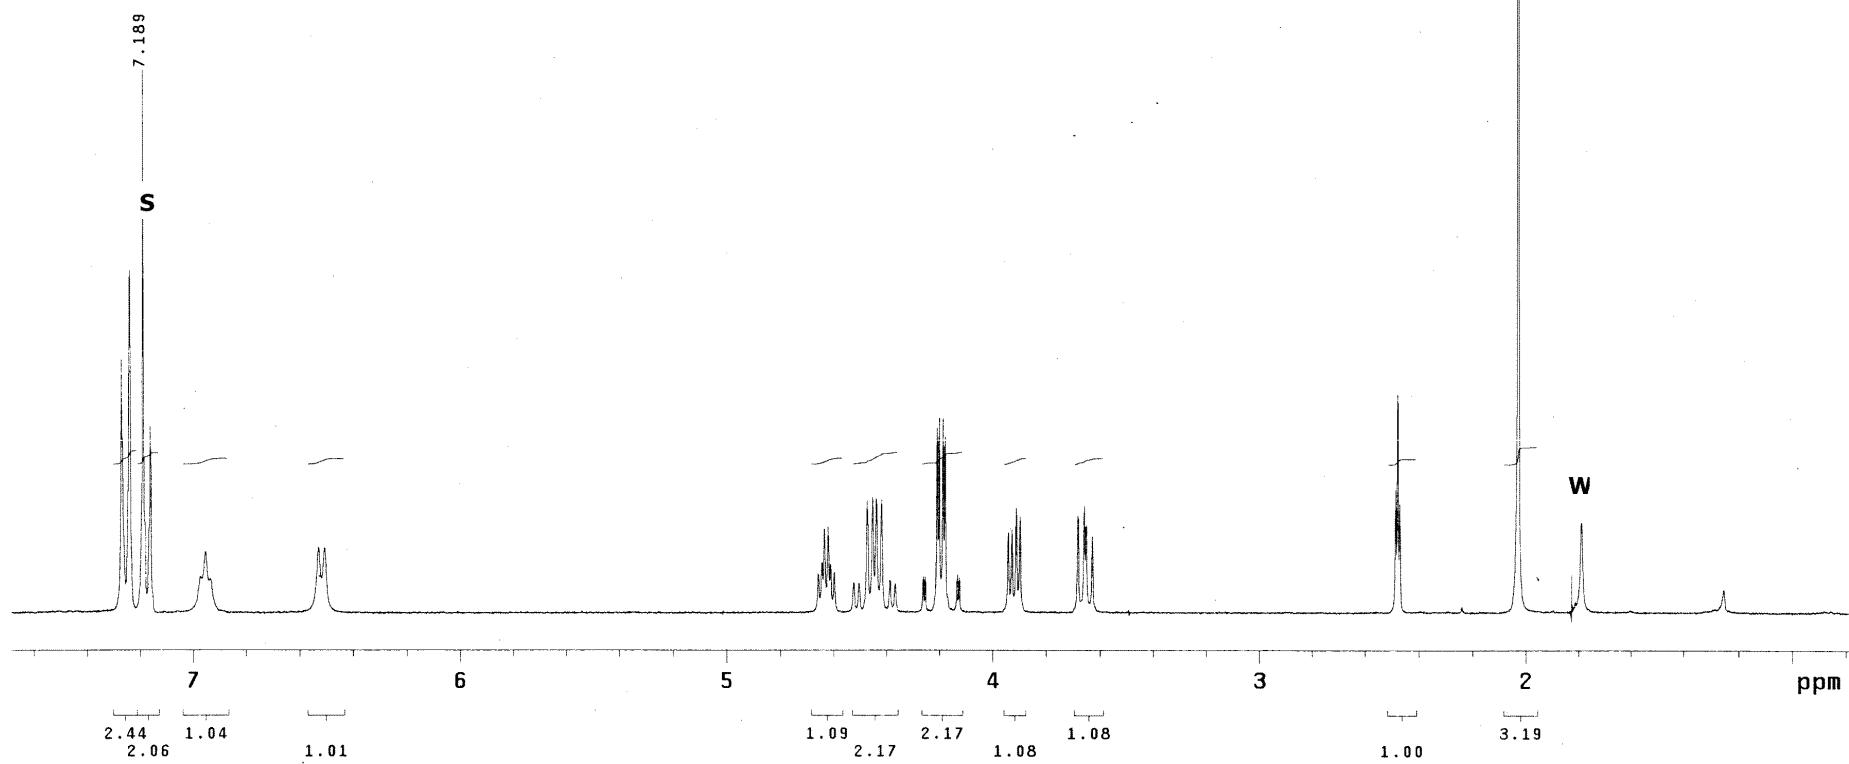

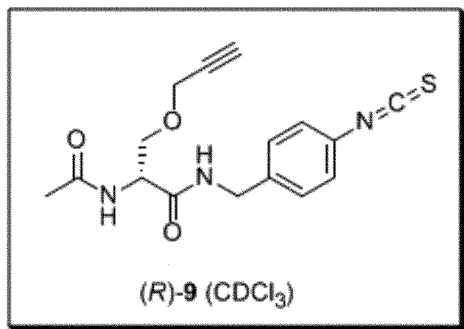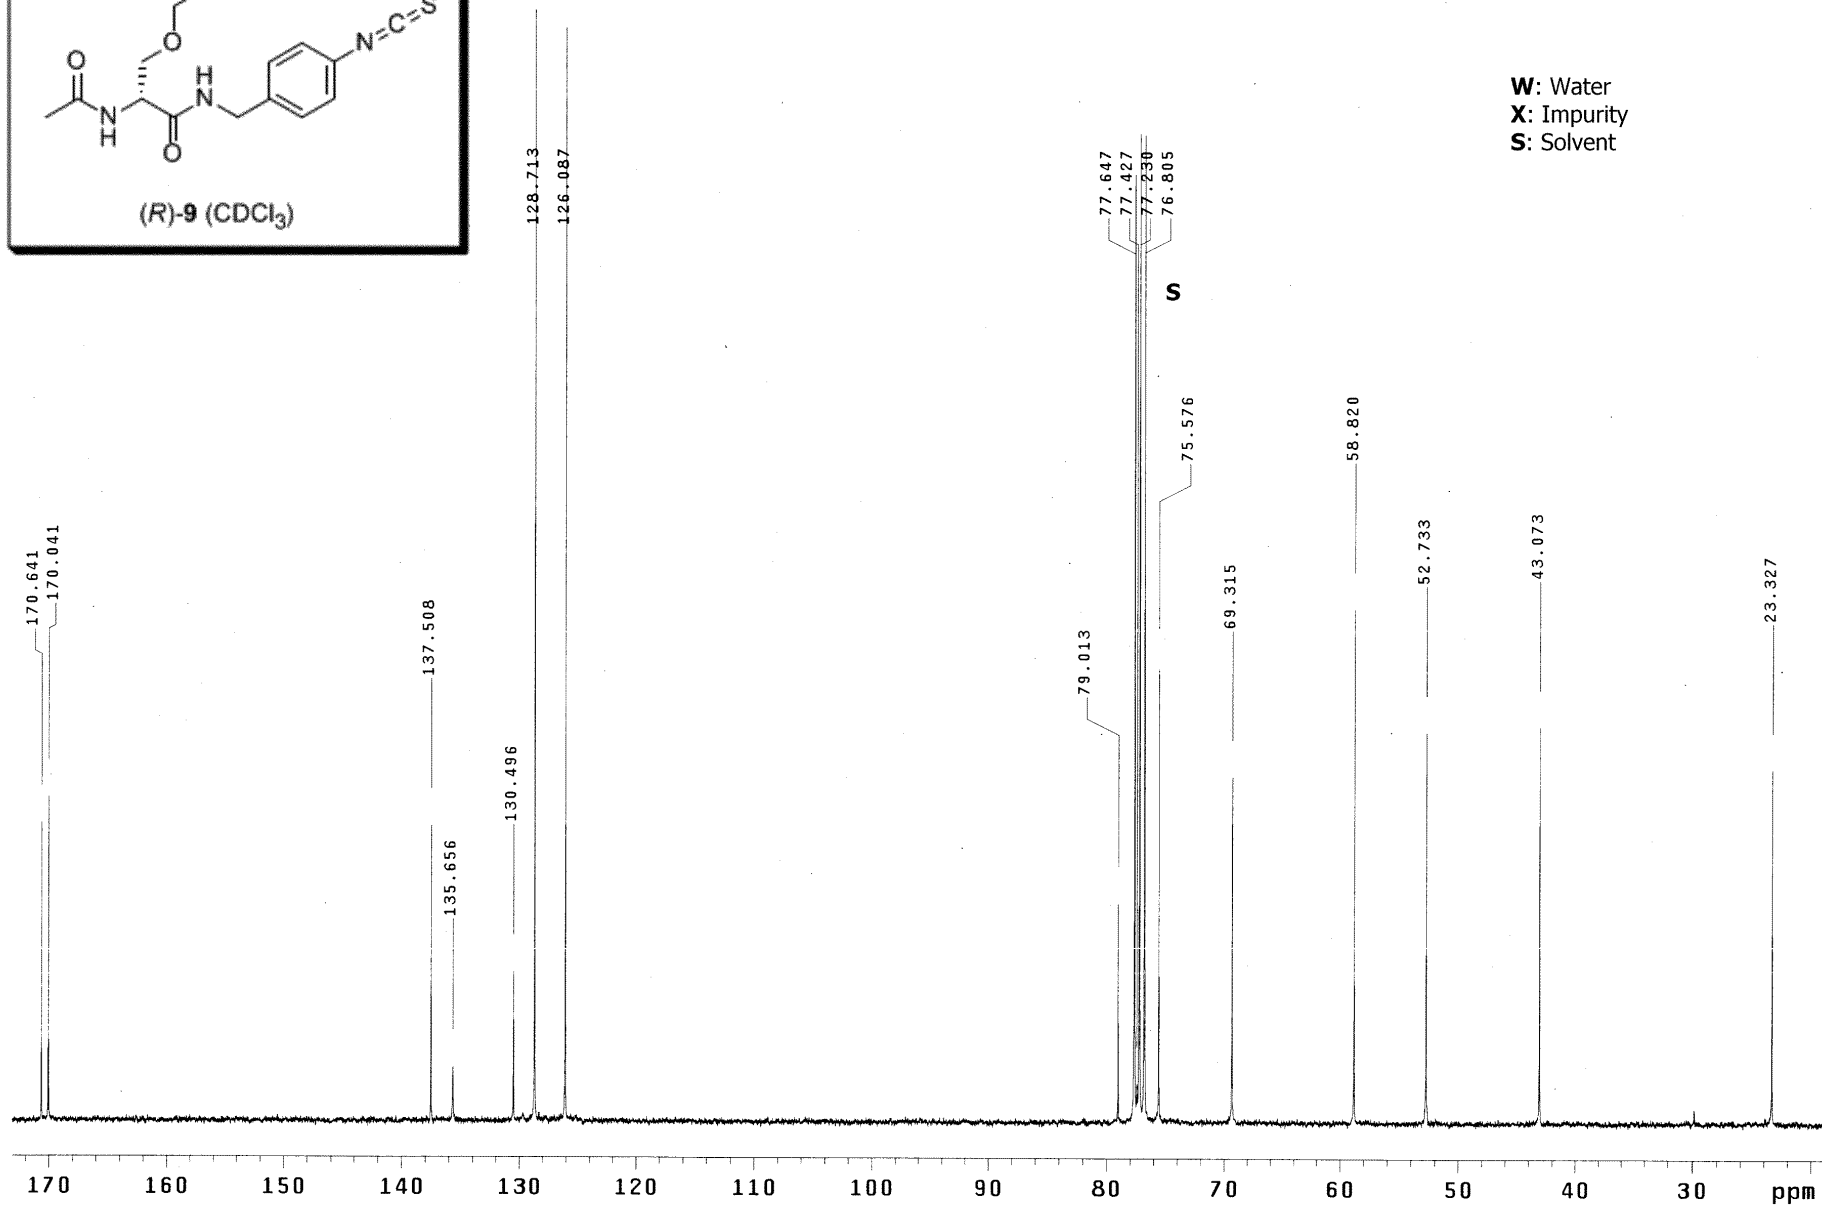

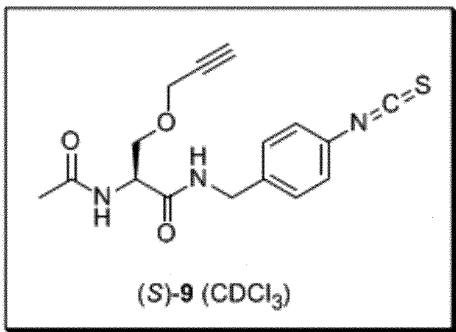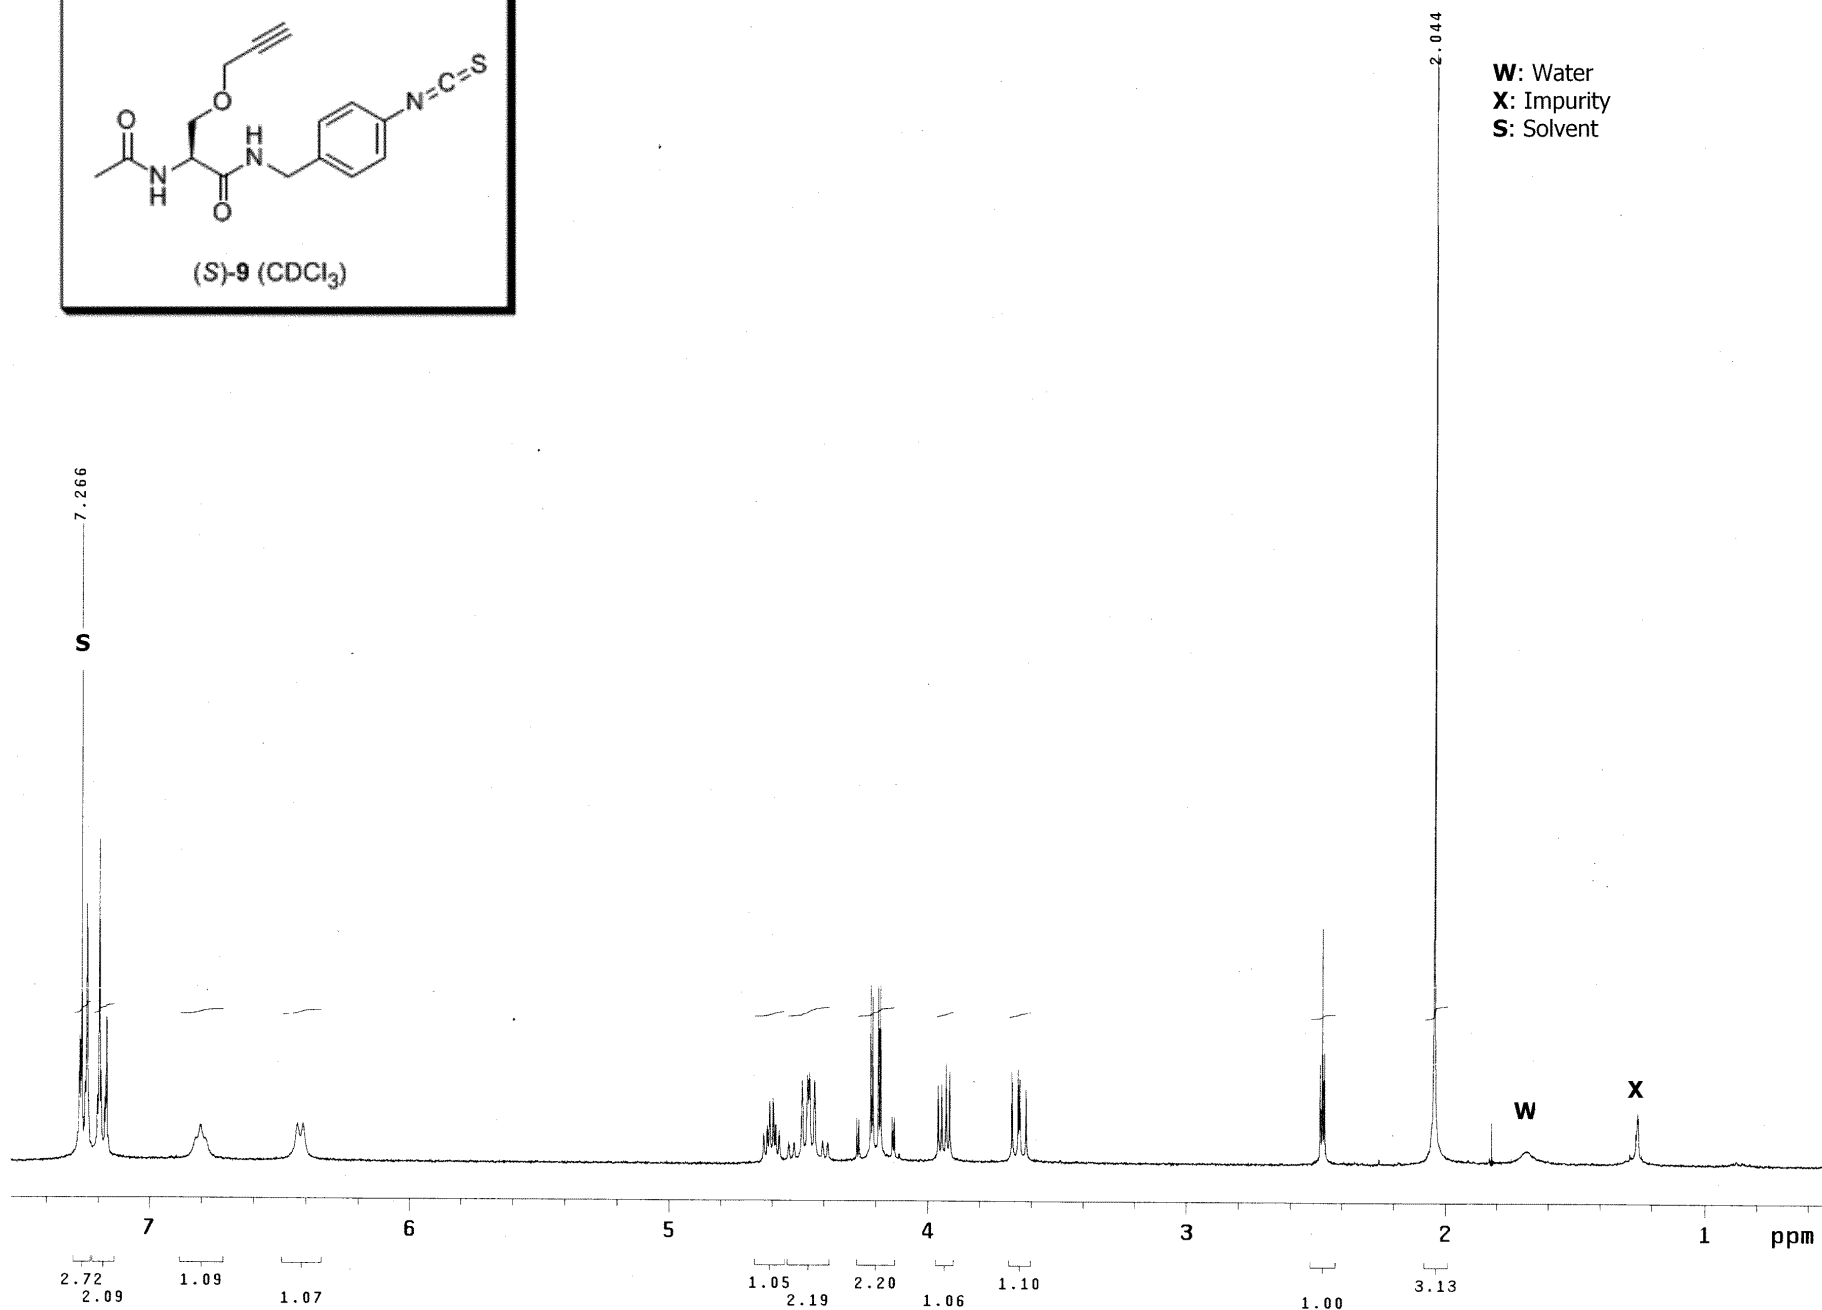

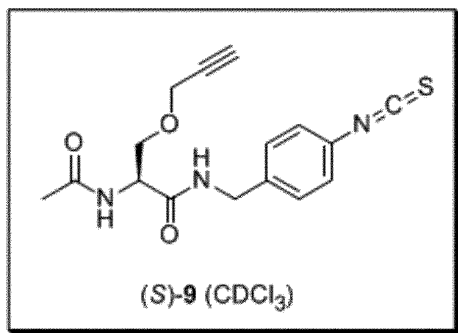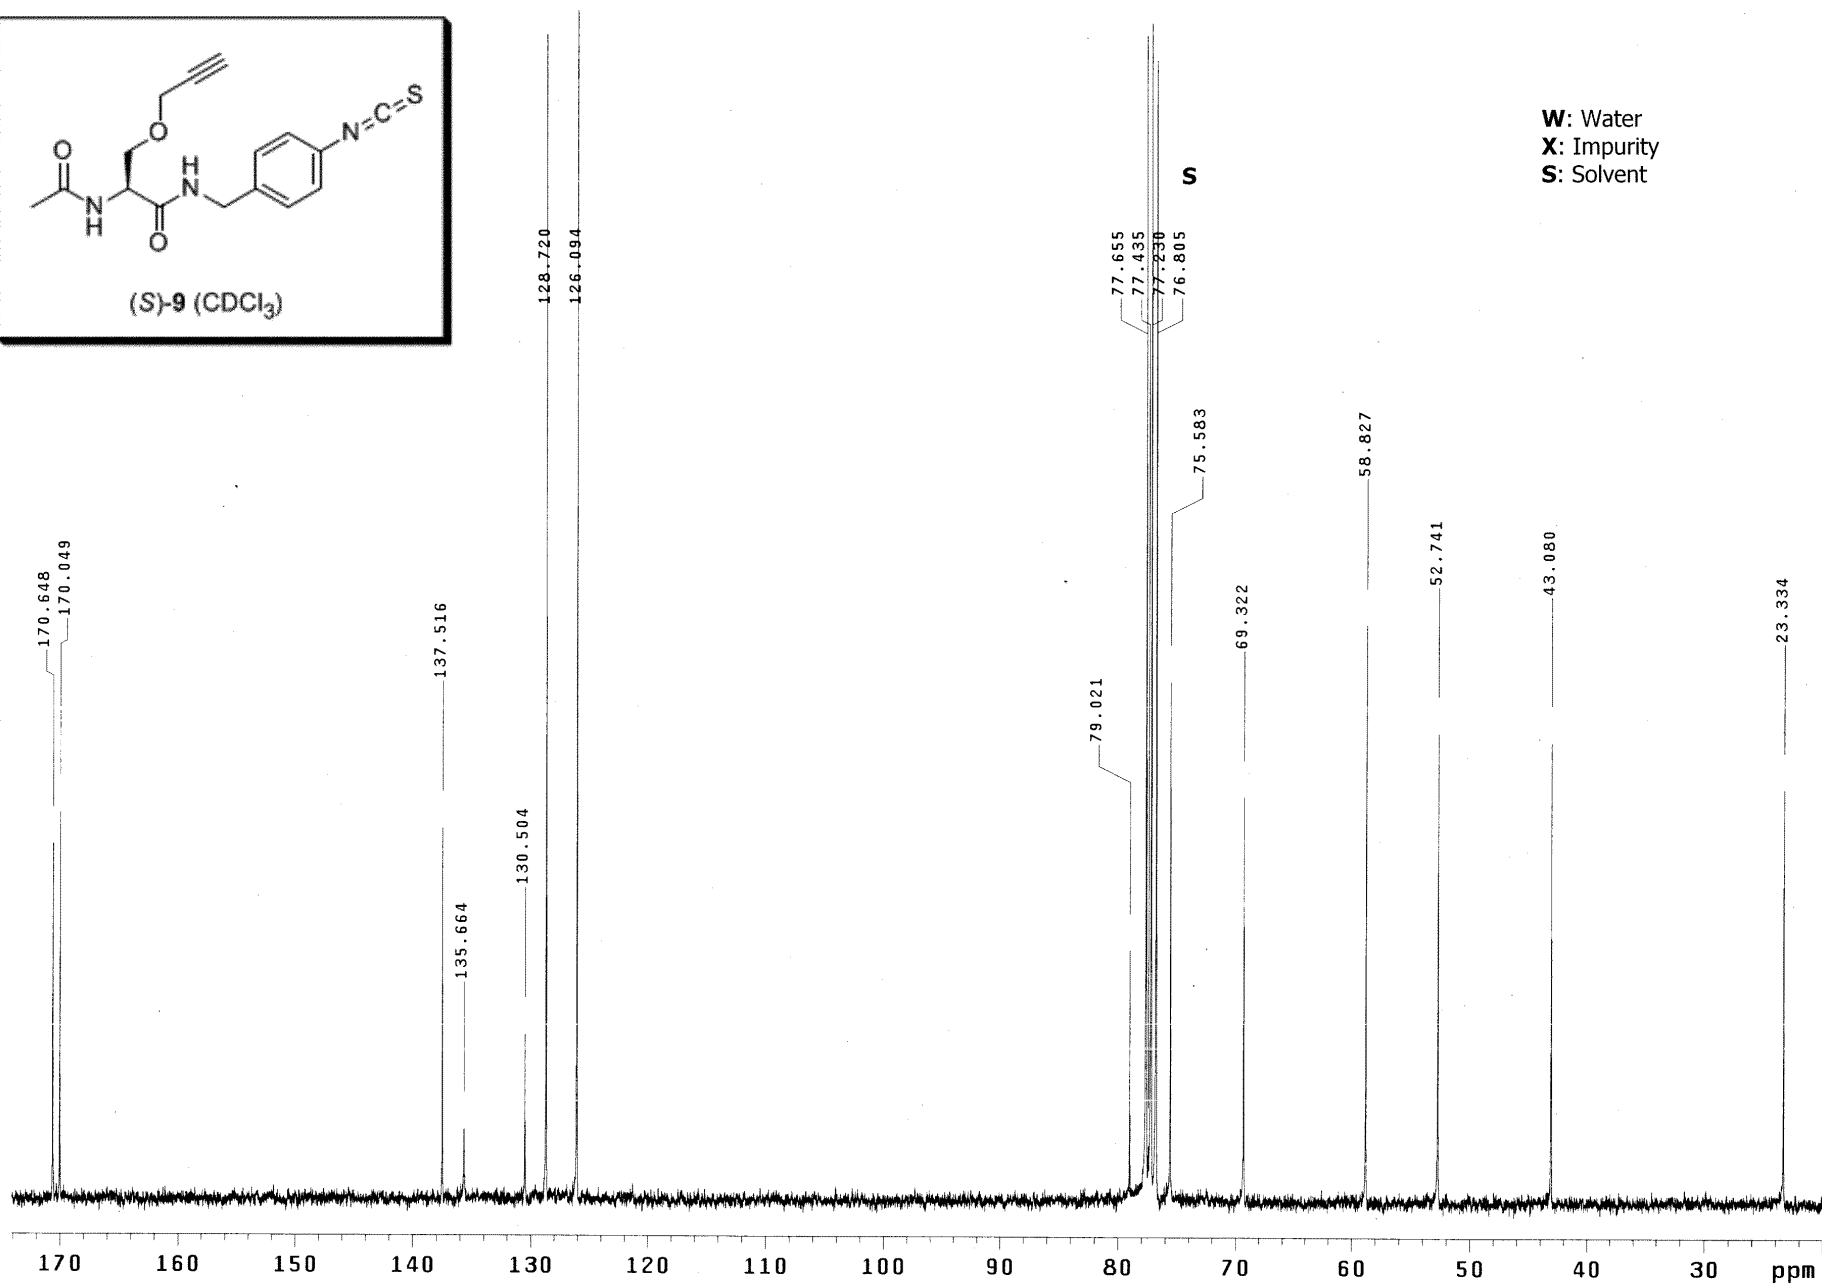

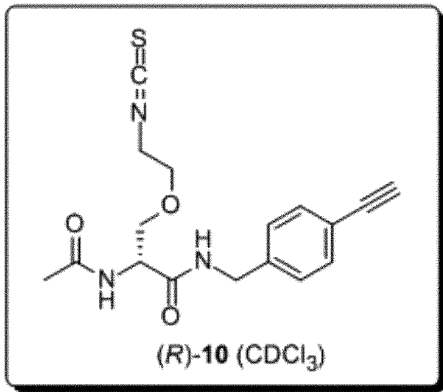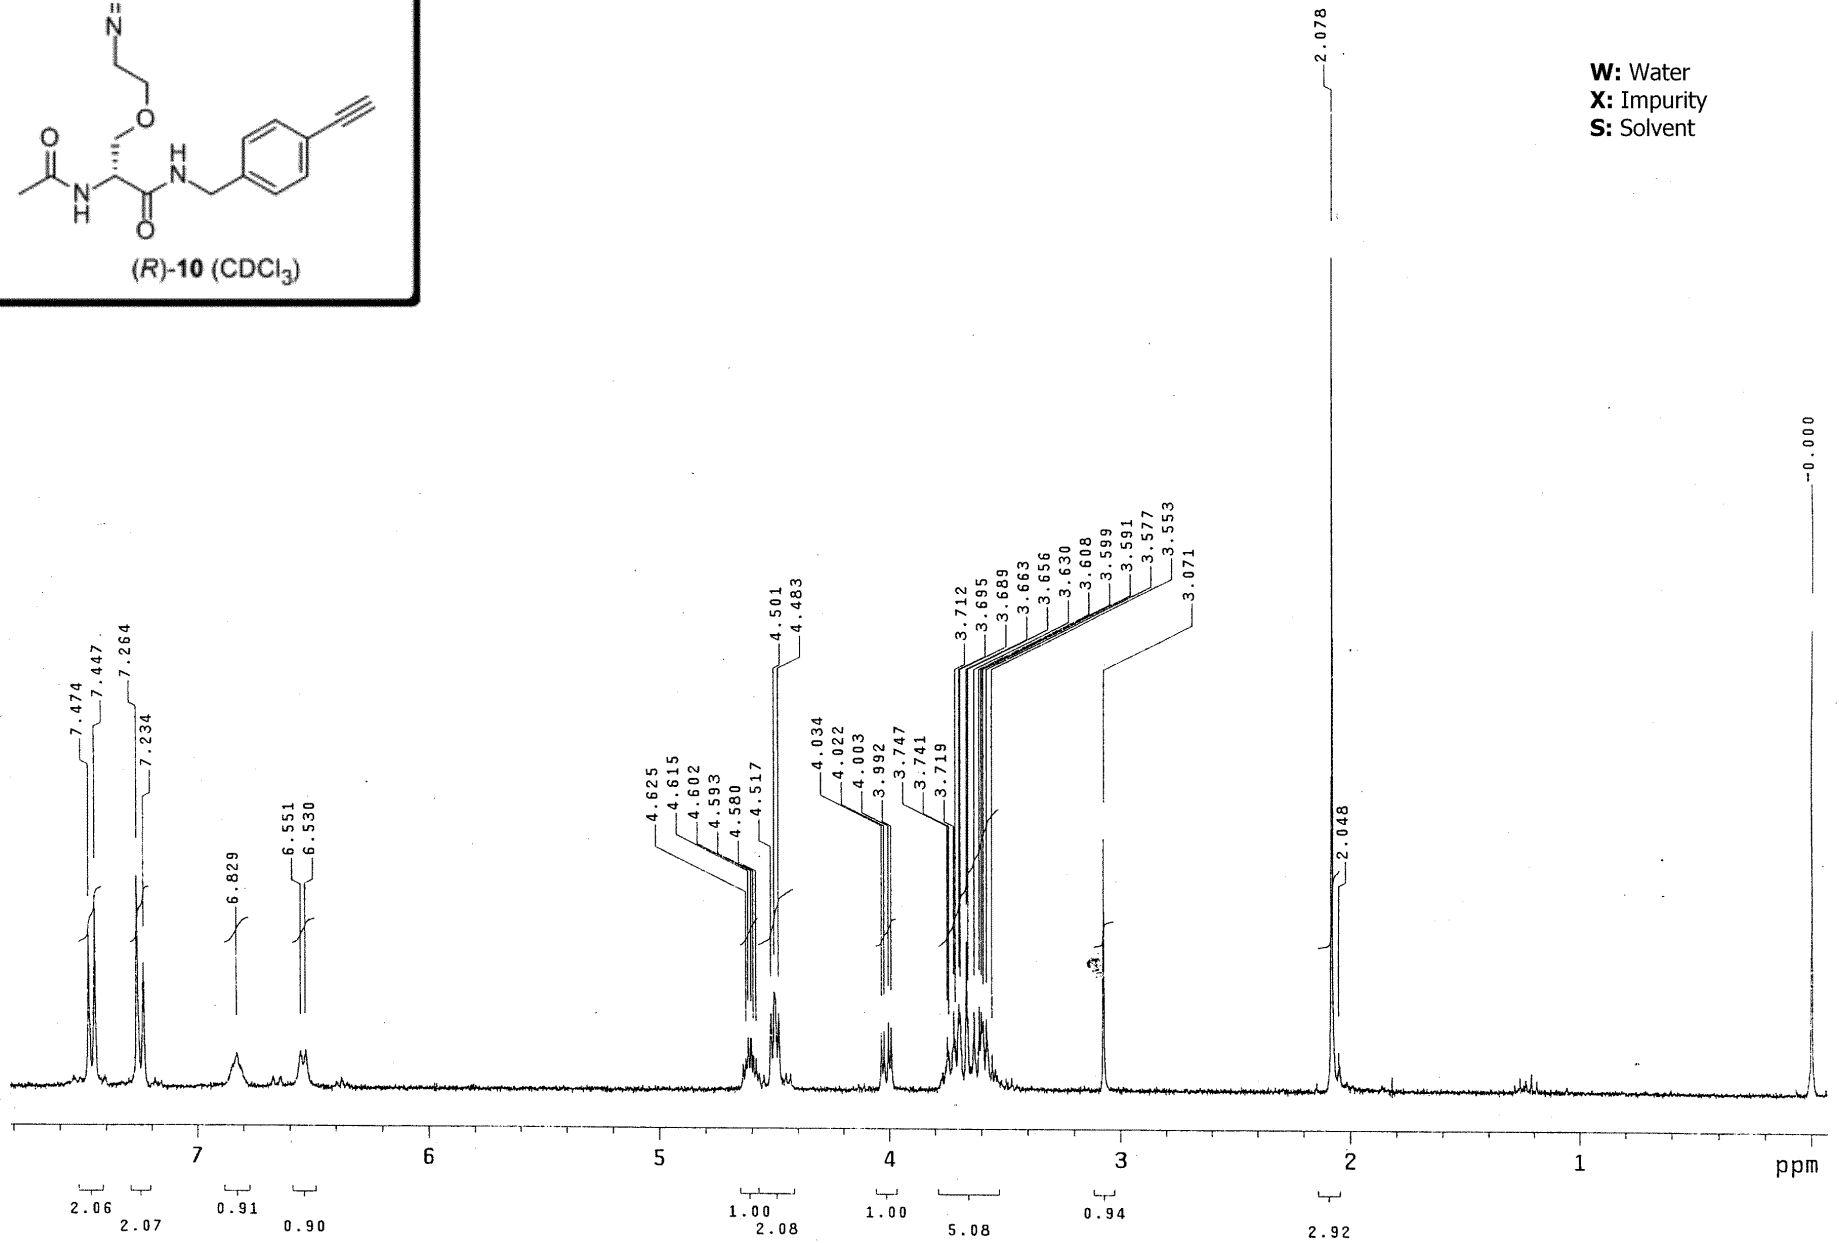

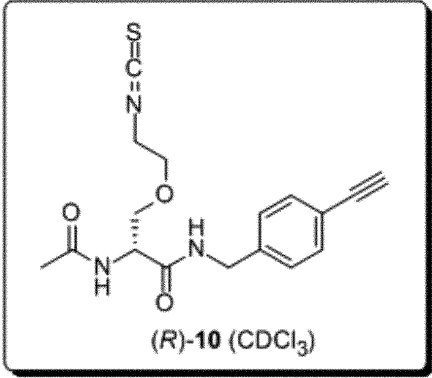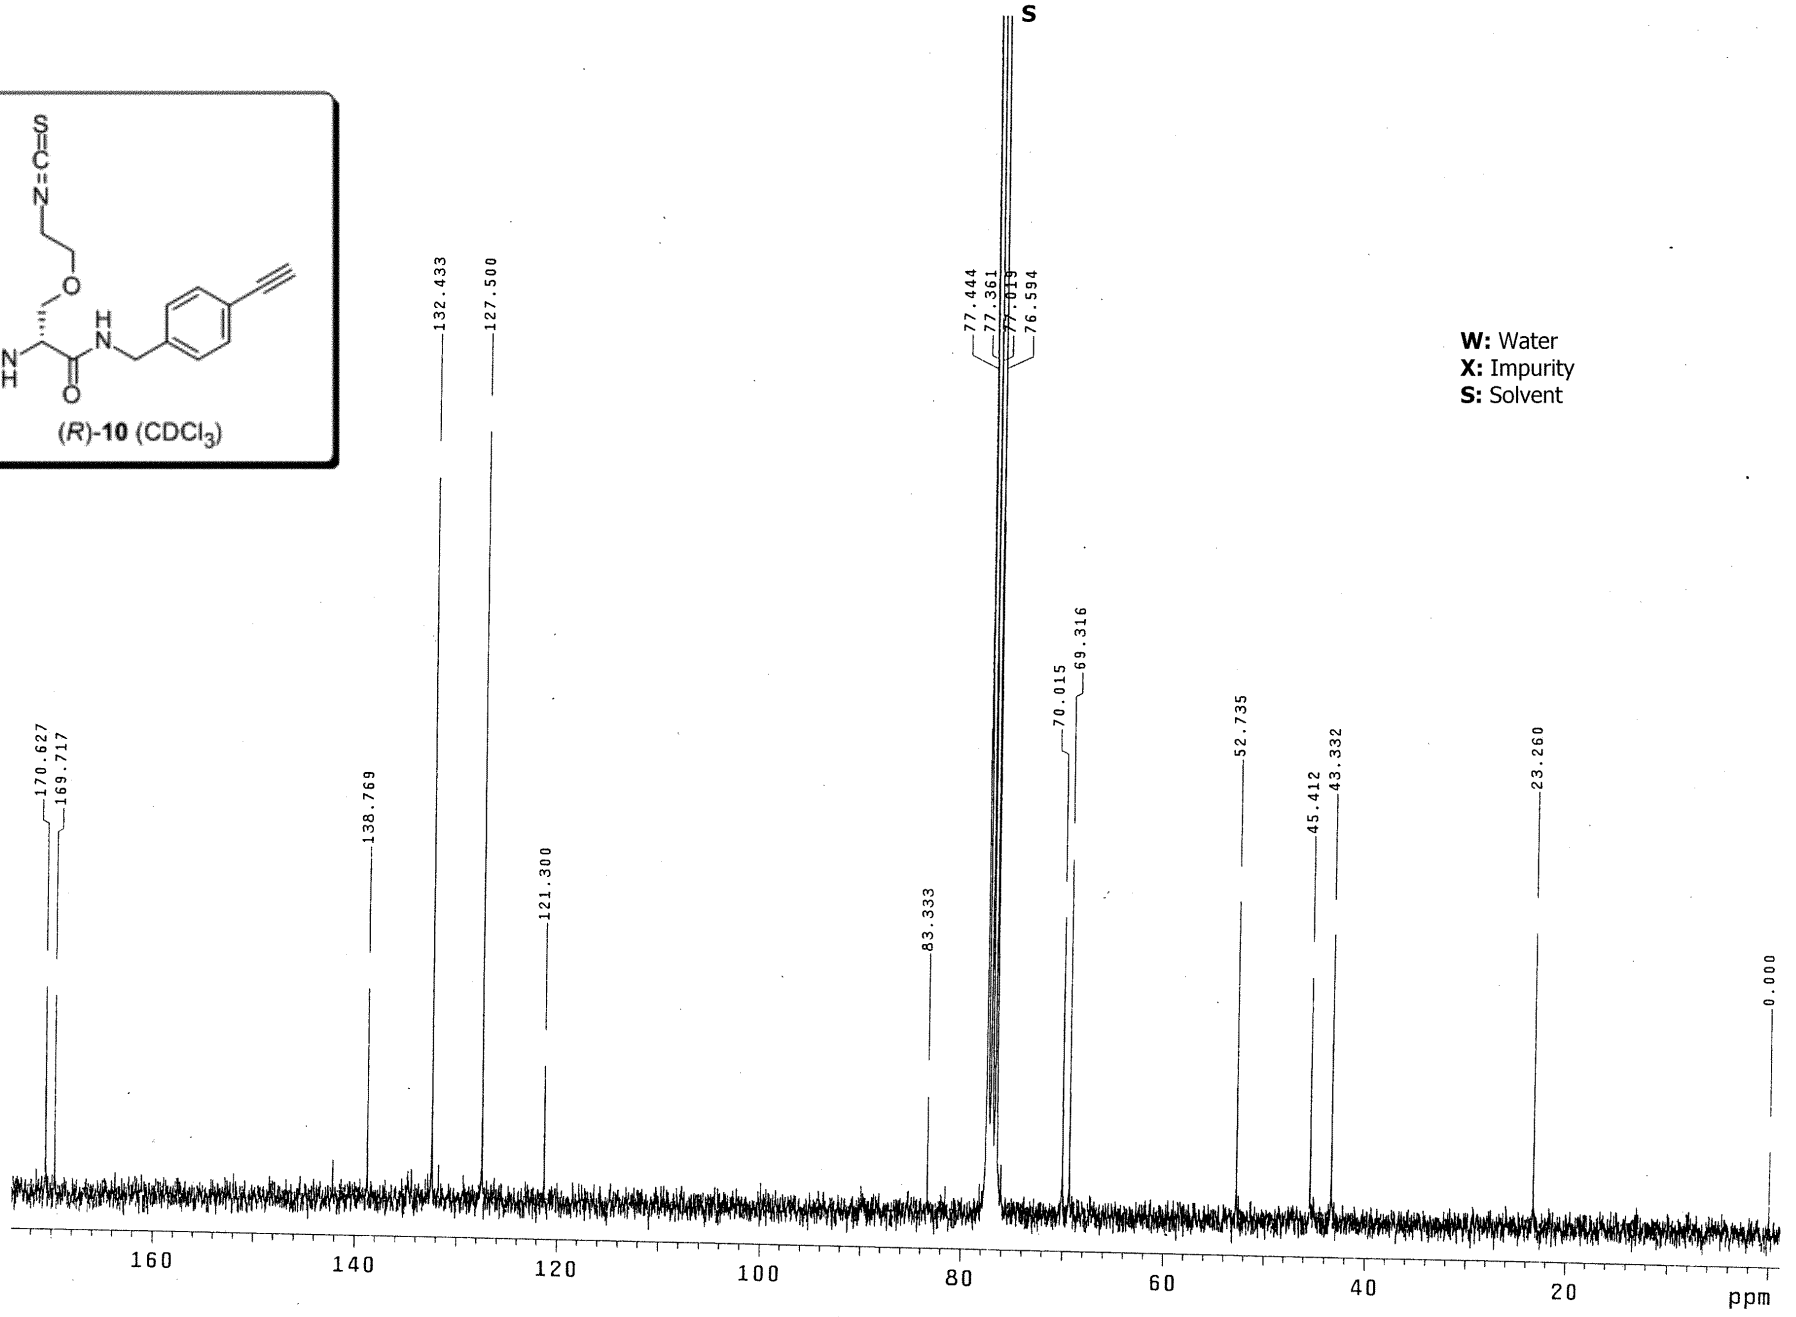

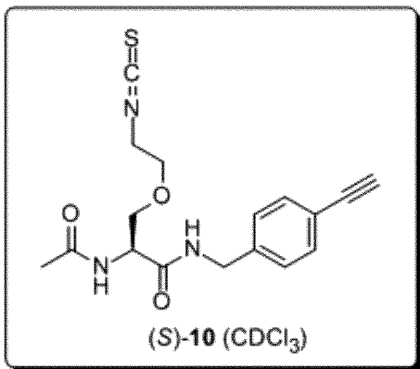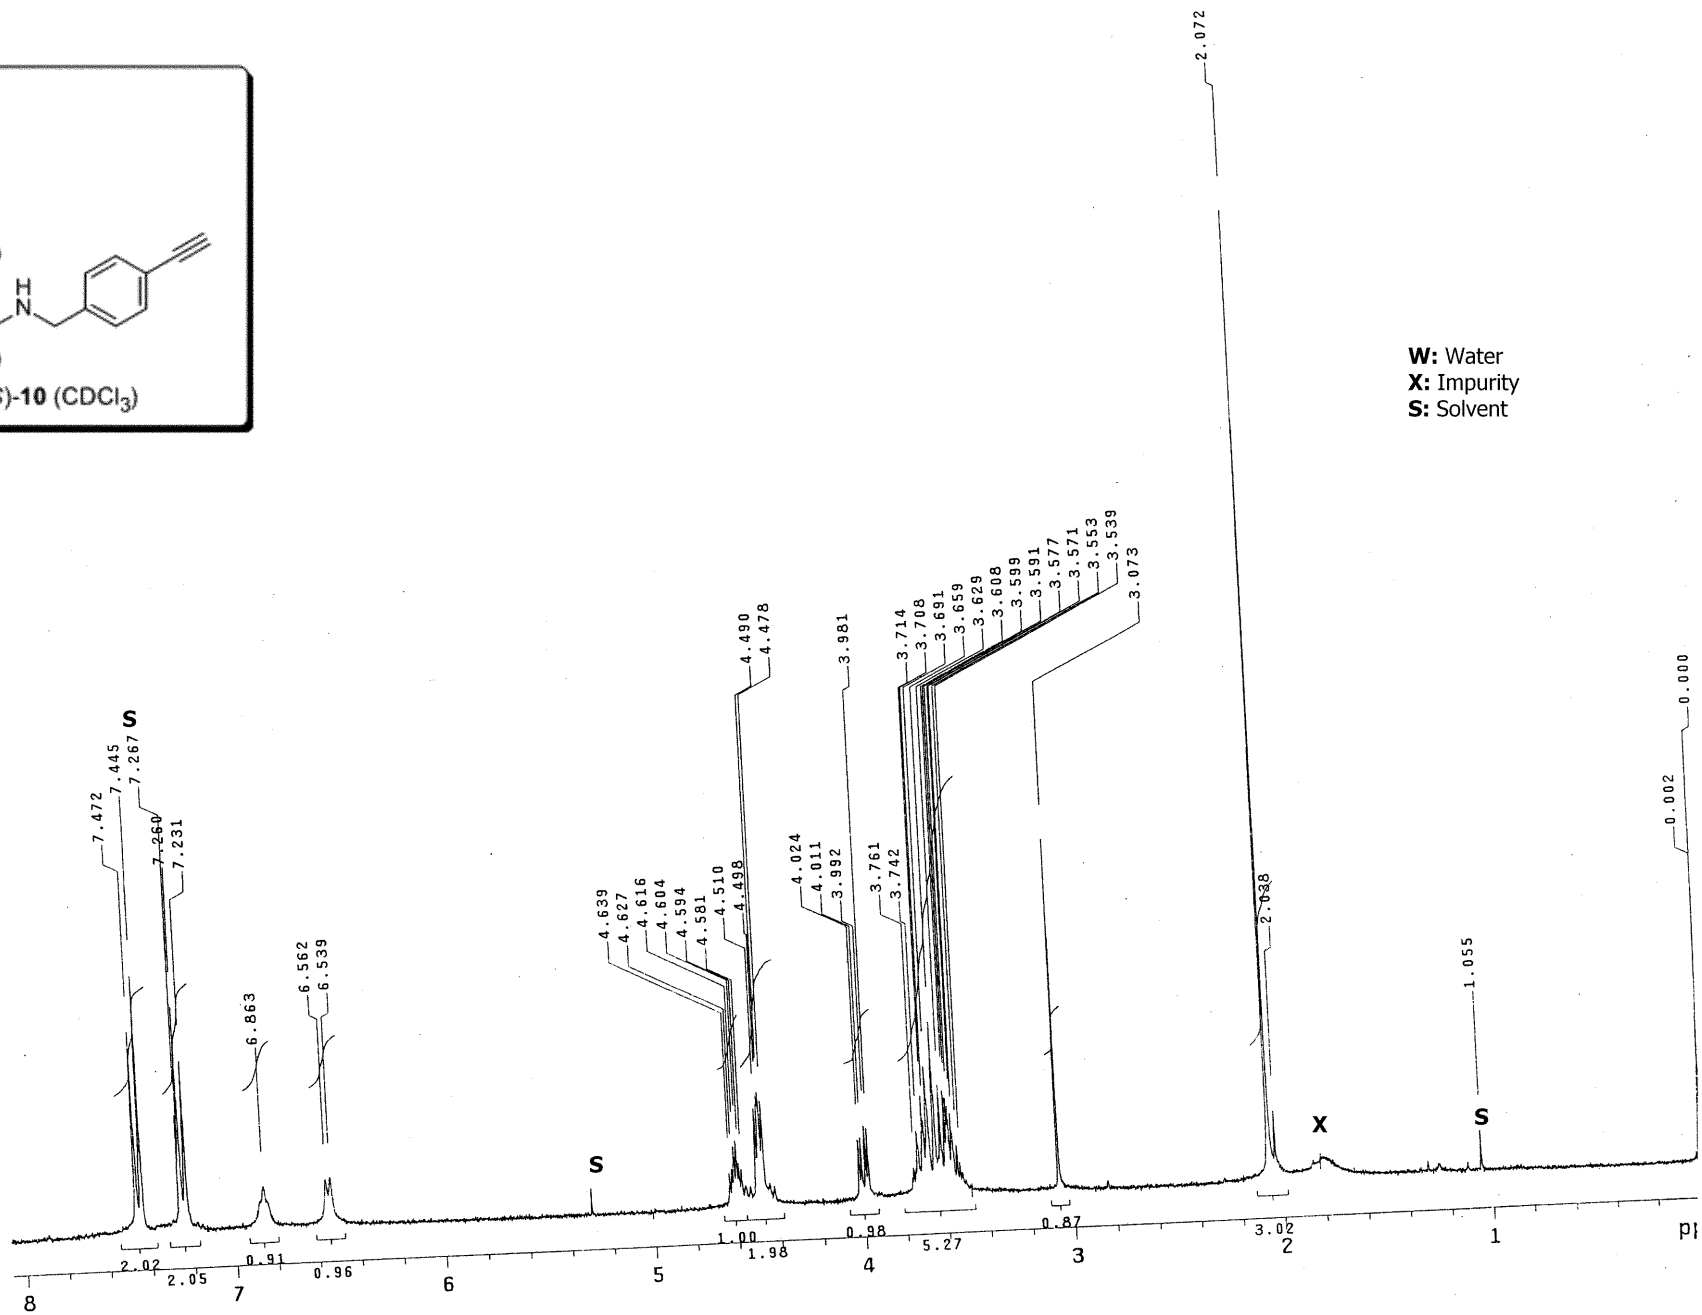



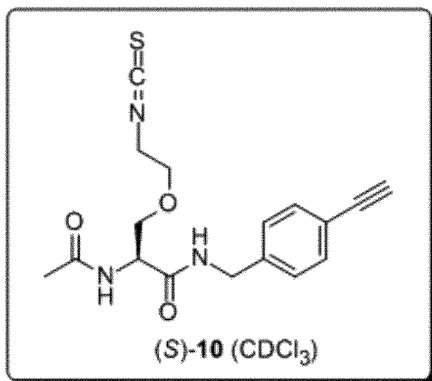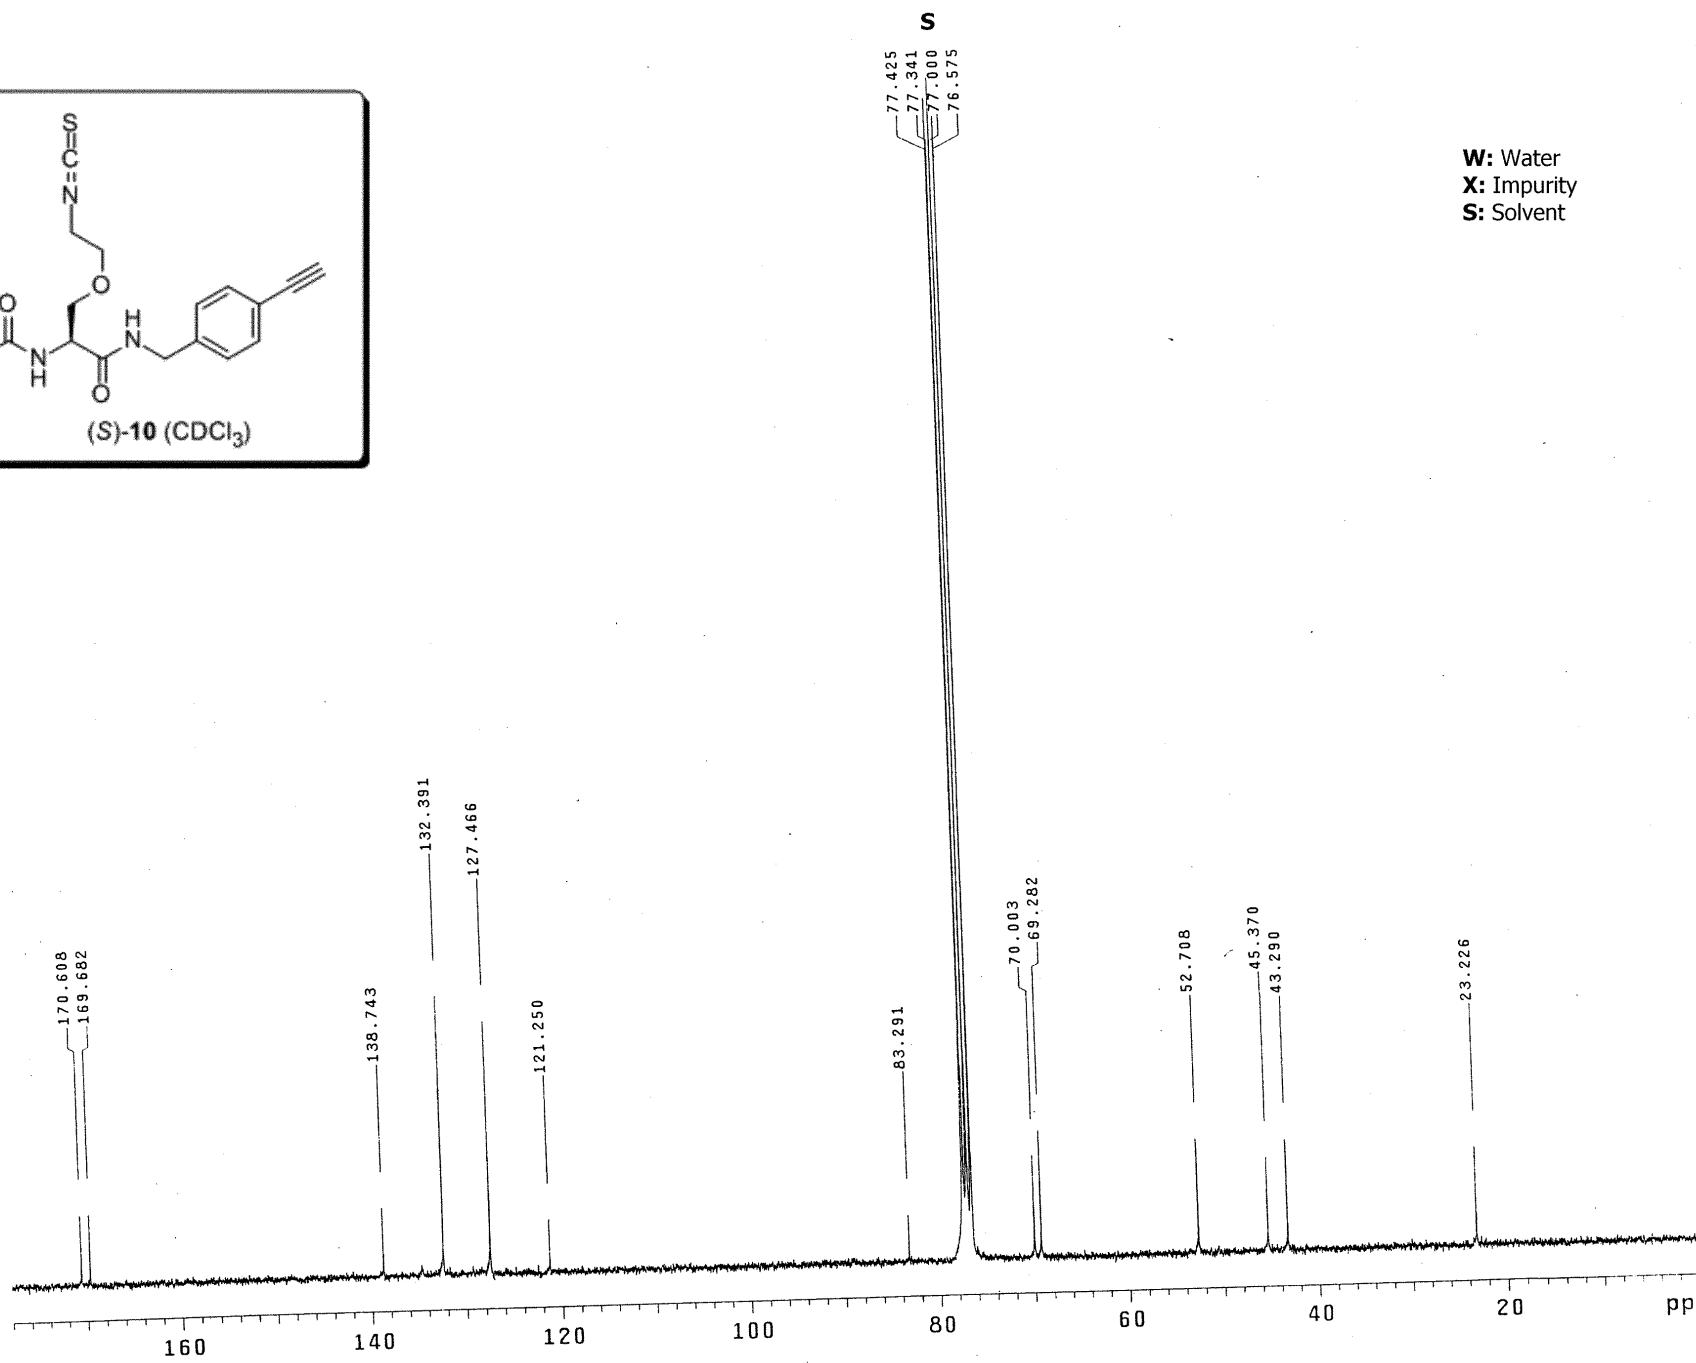

W: Water  
X: Impurity  
S: Solvent

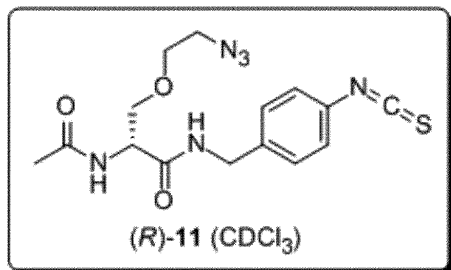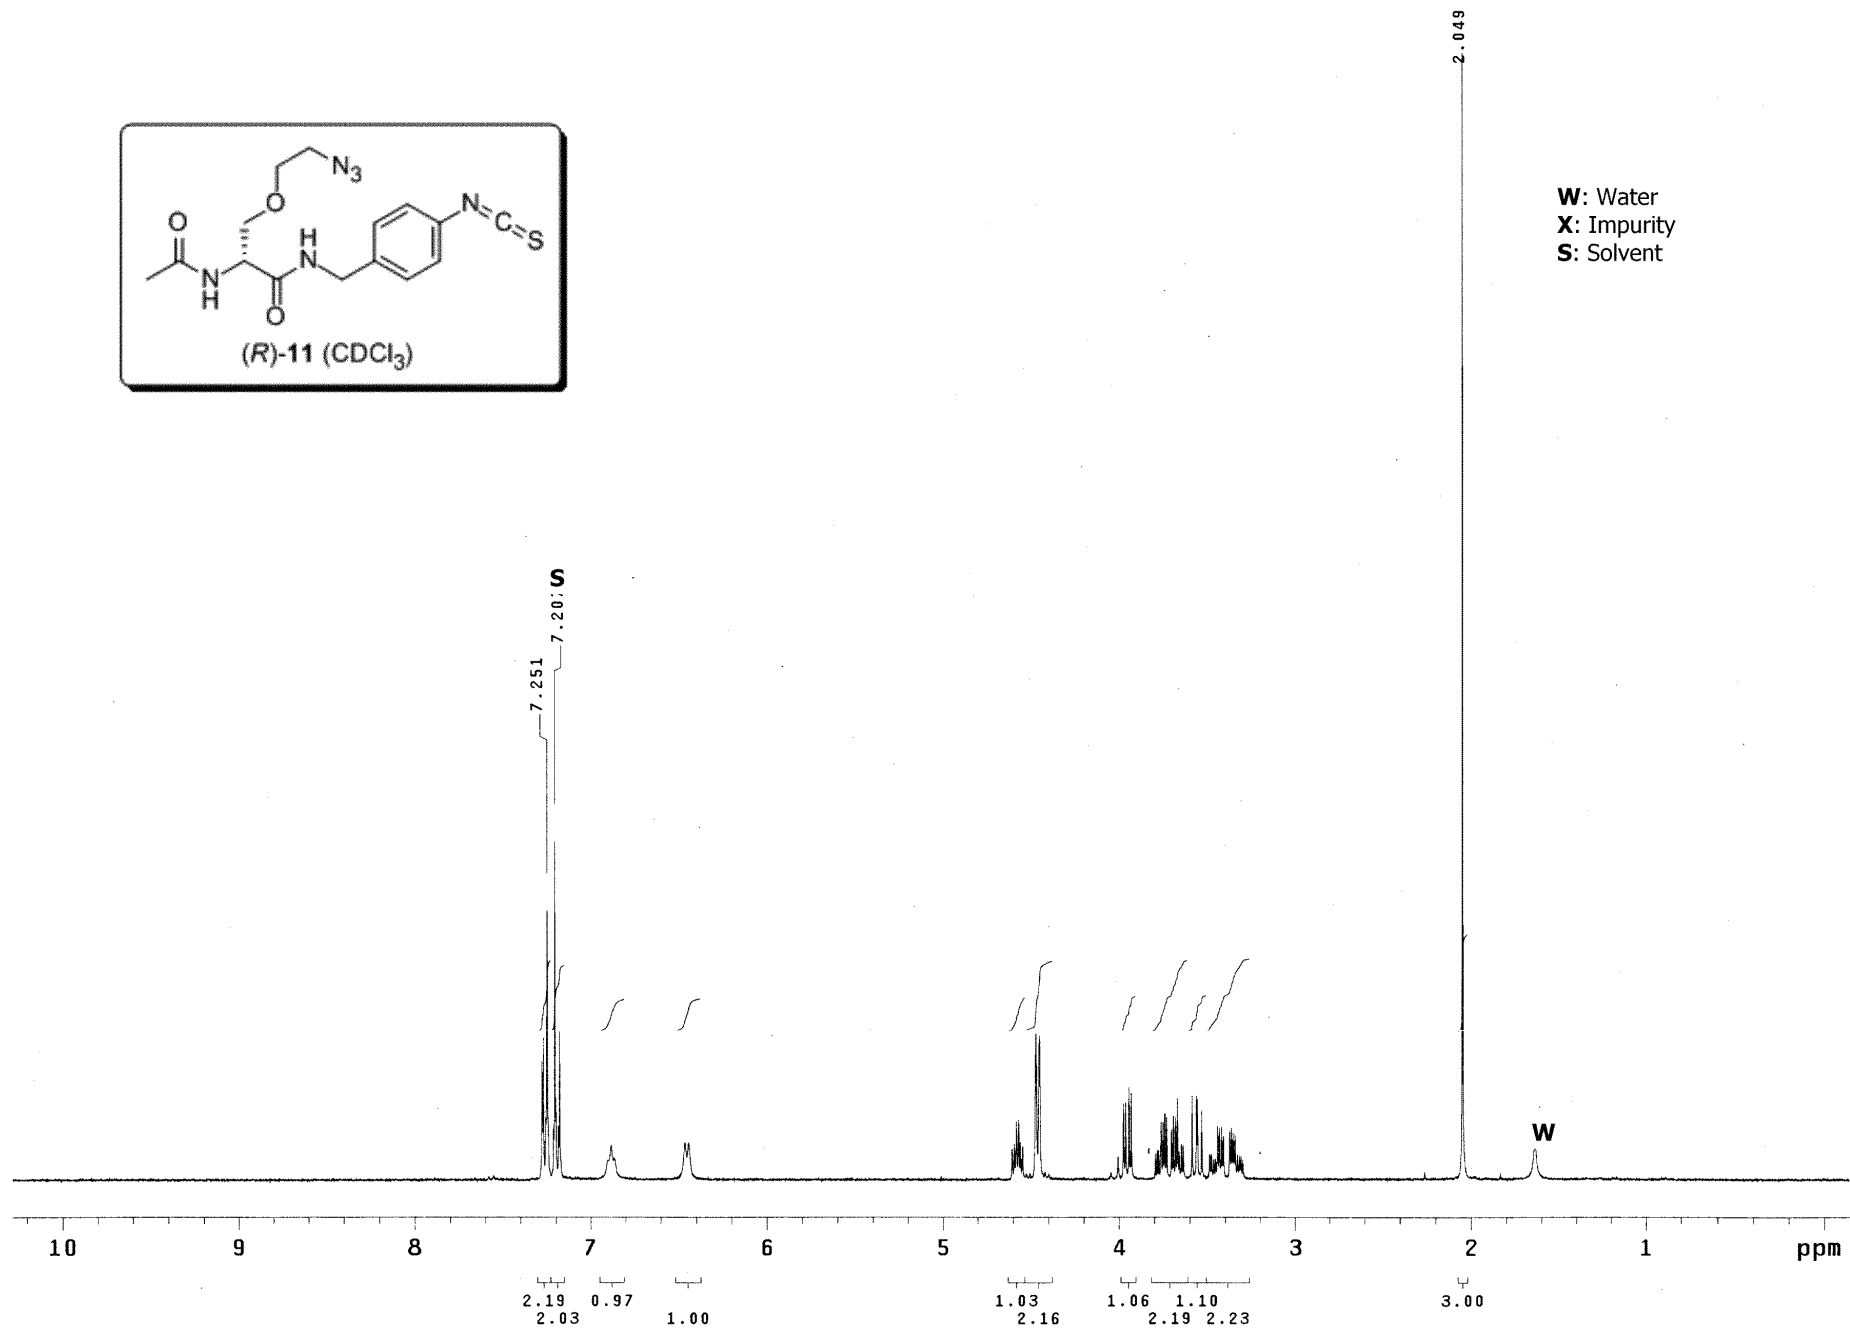

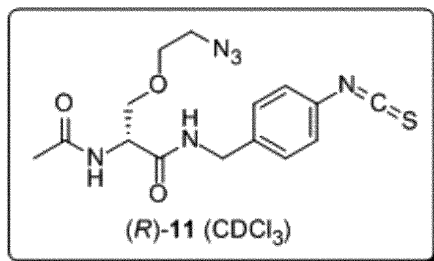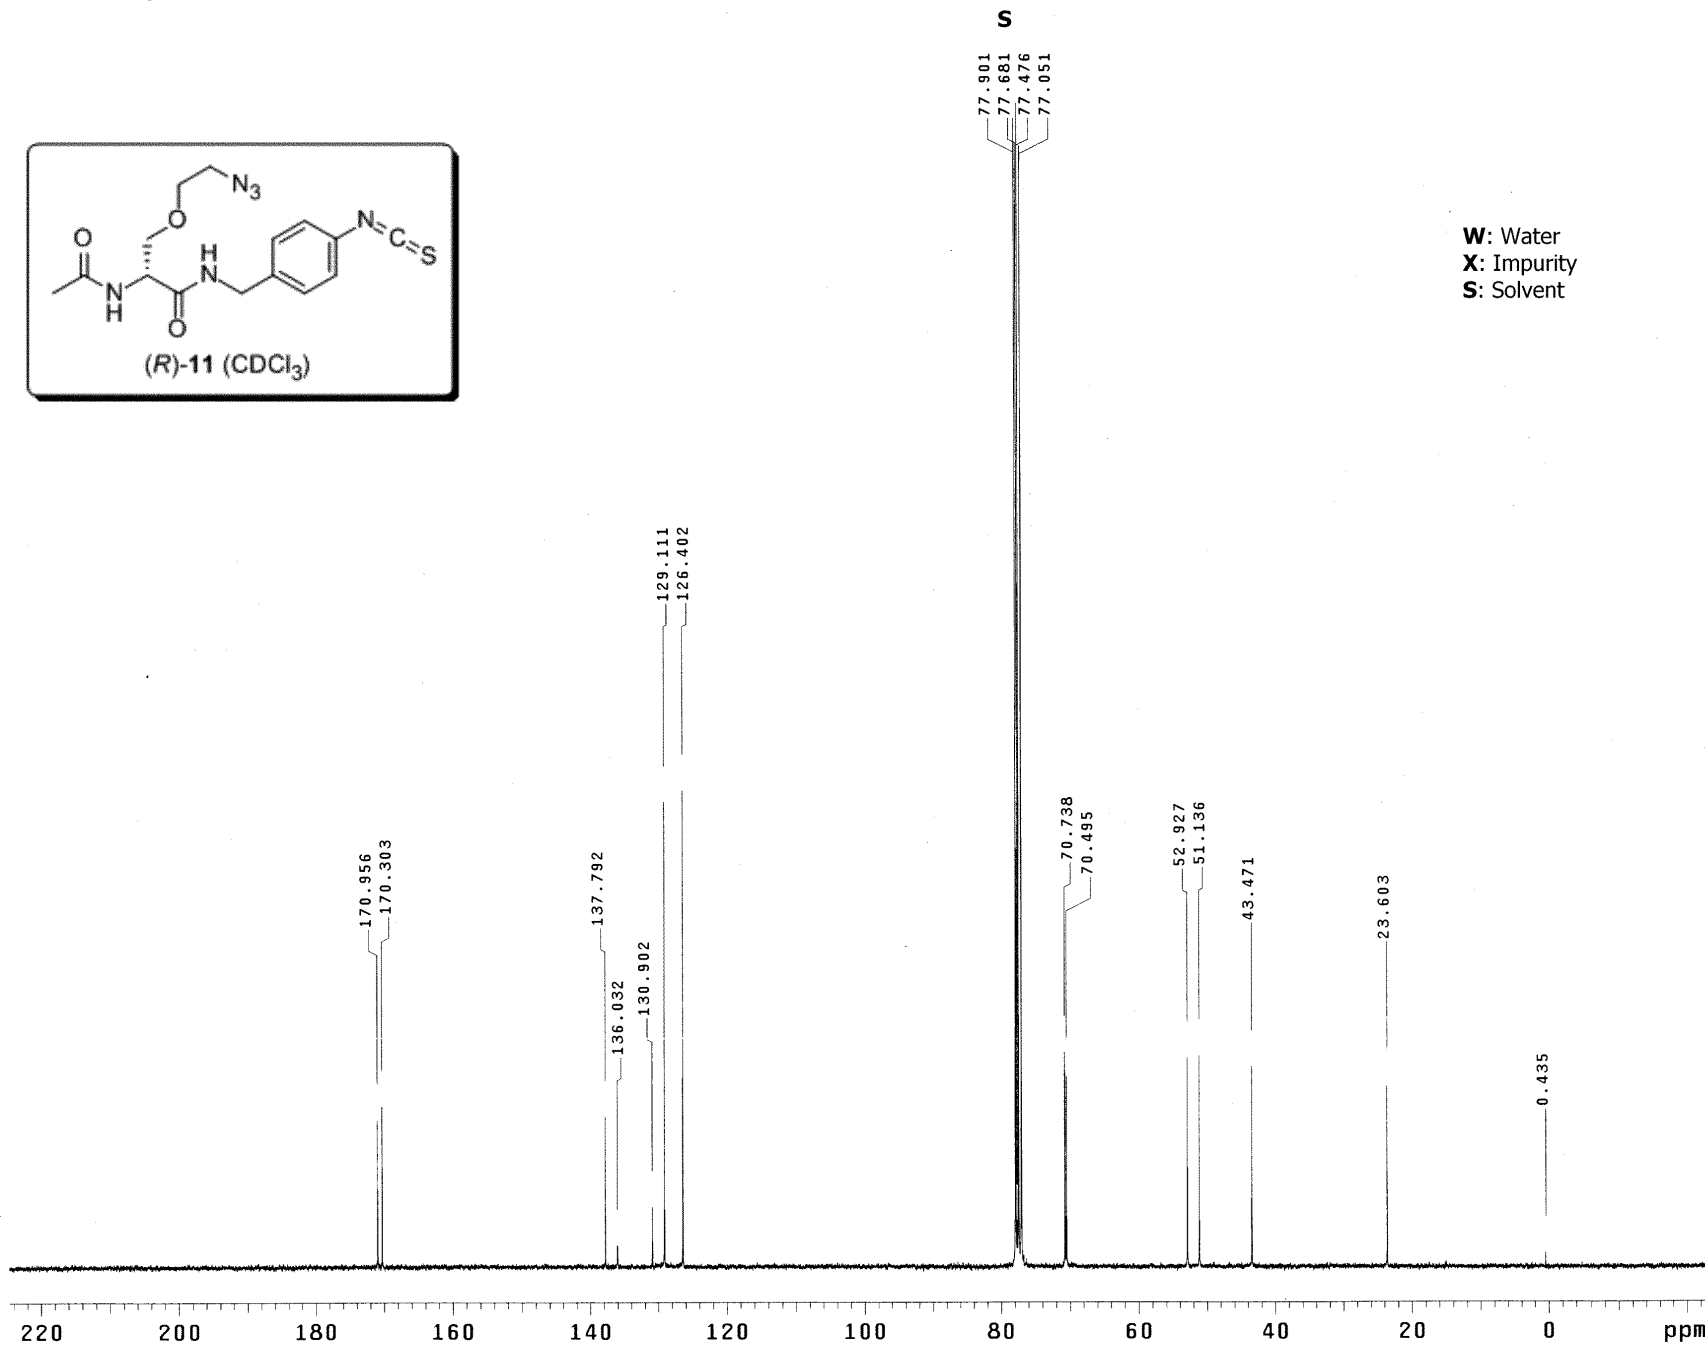

W: Water  
X: Impurity  
S: Solvent

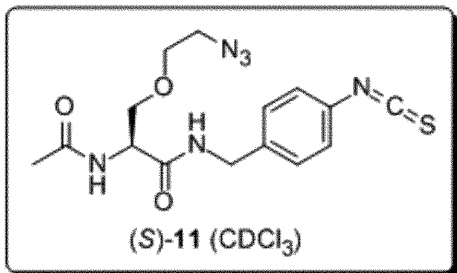

W: Water  
 X: Impurity  
 S: Solvent

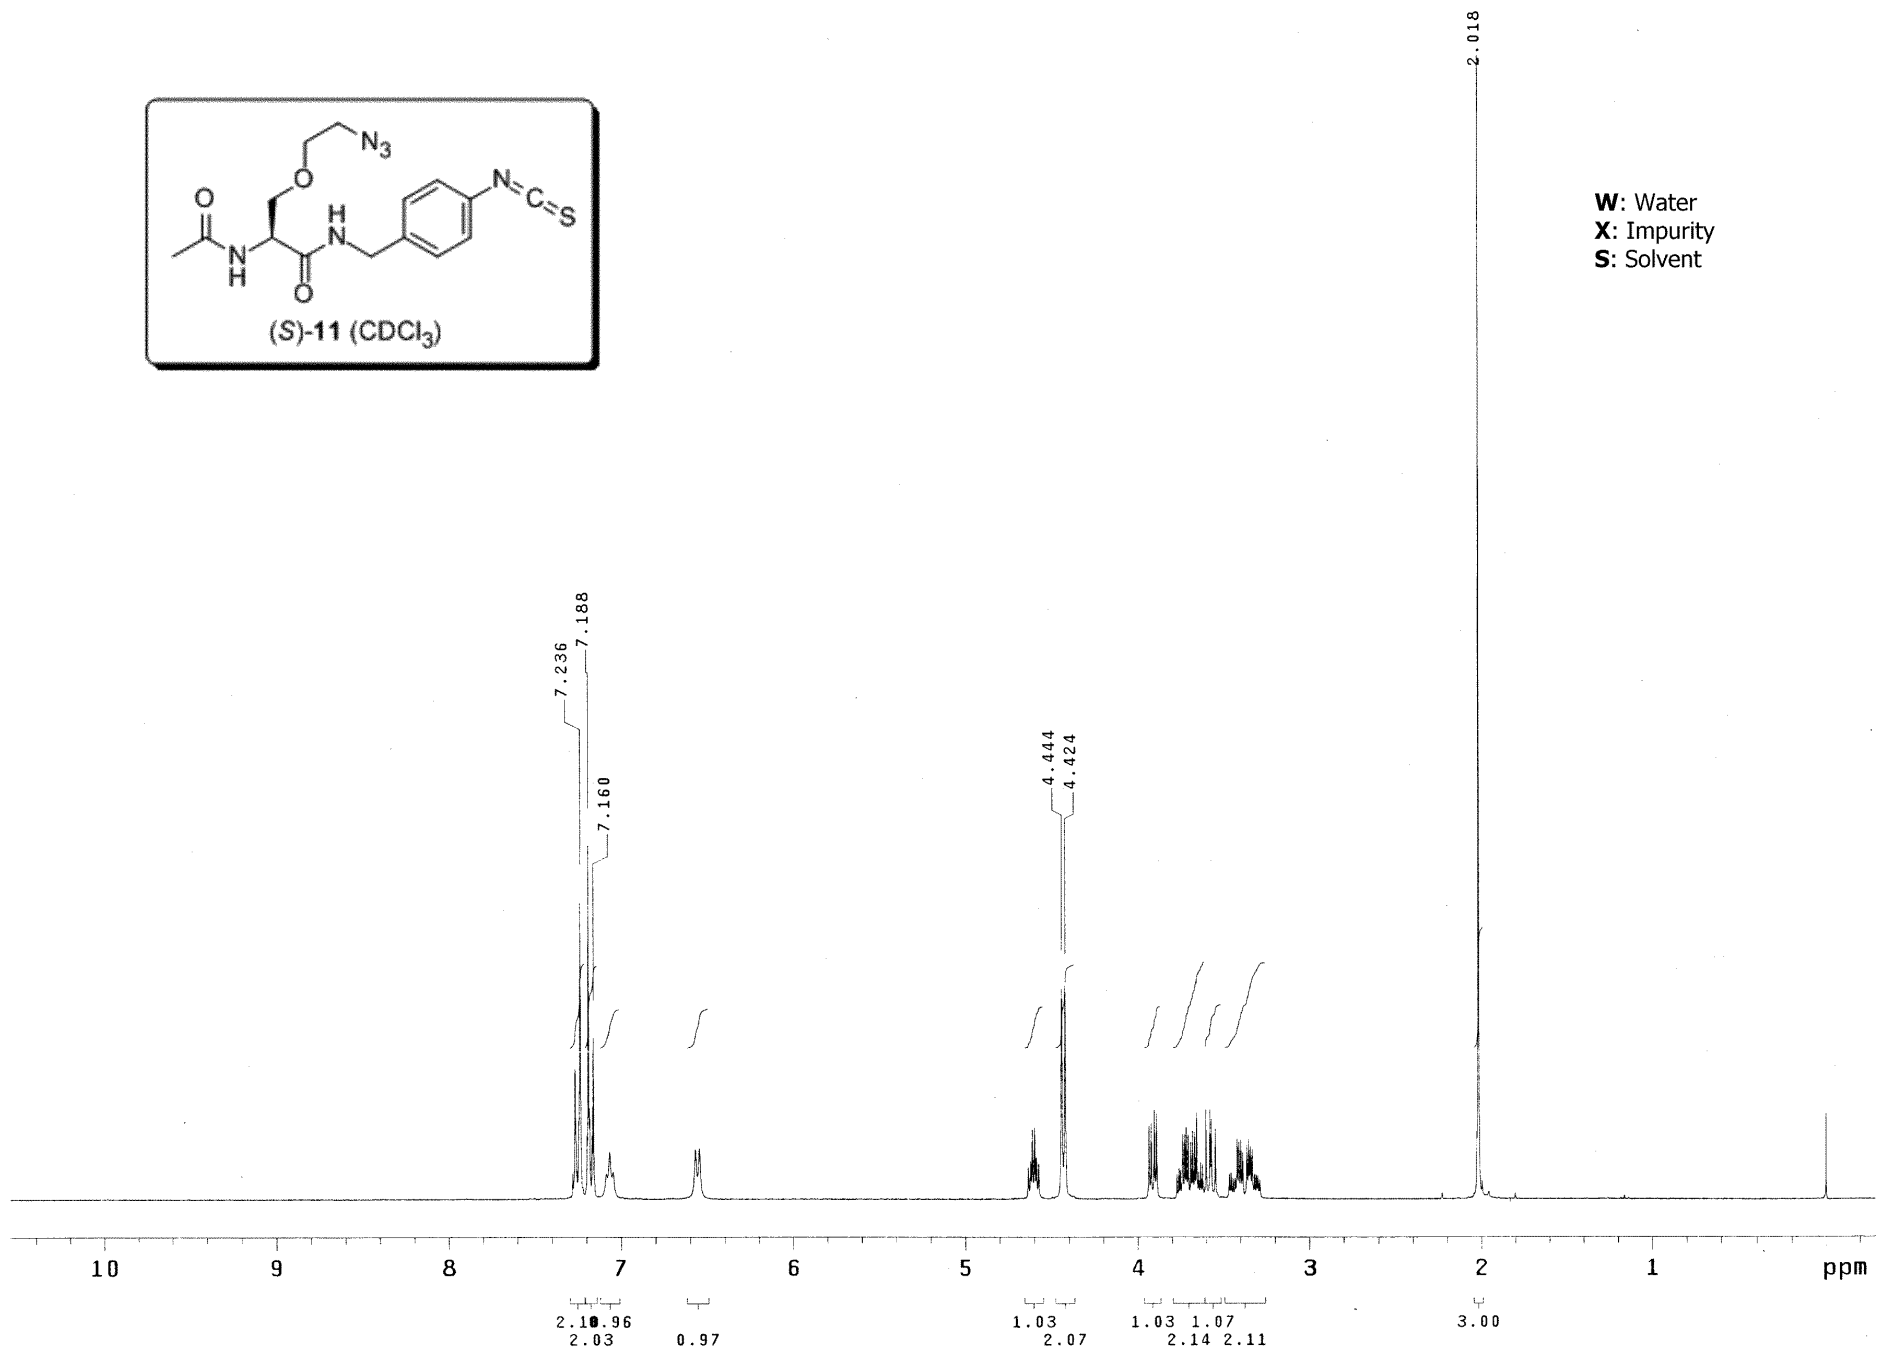

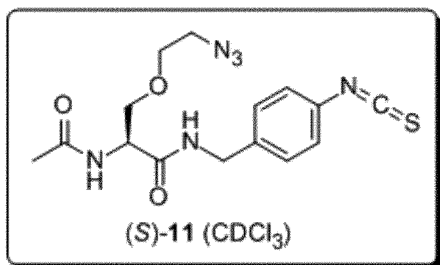

W: Water  
 X: Impurity  
 S: Solvent

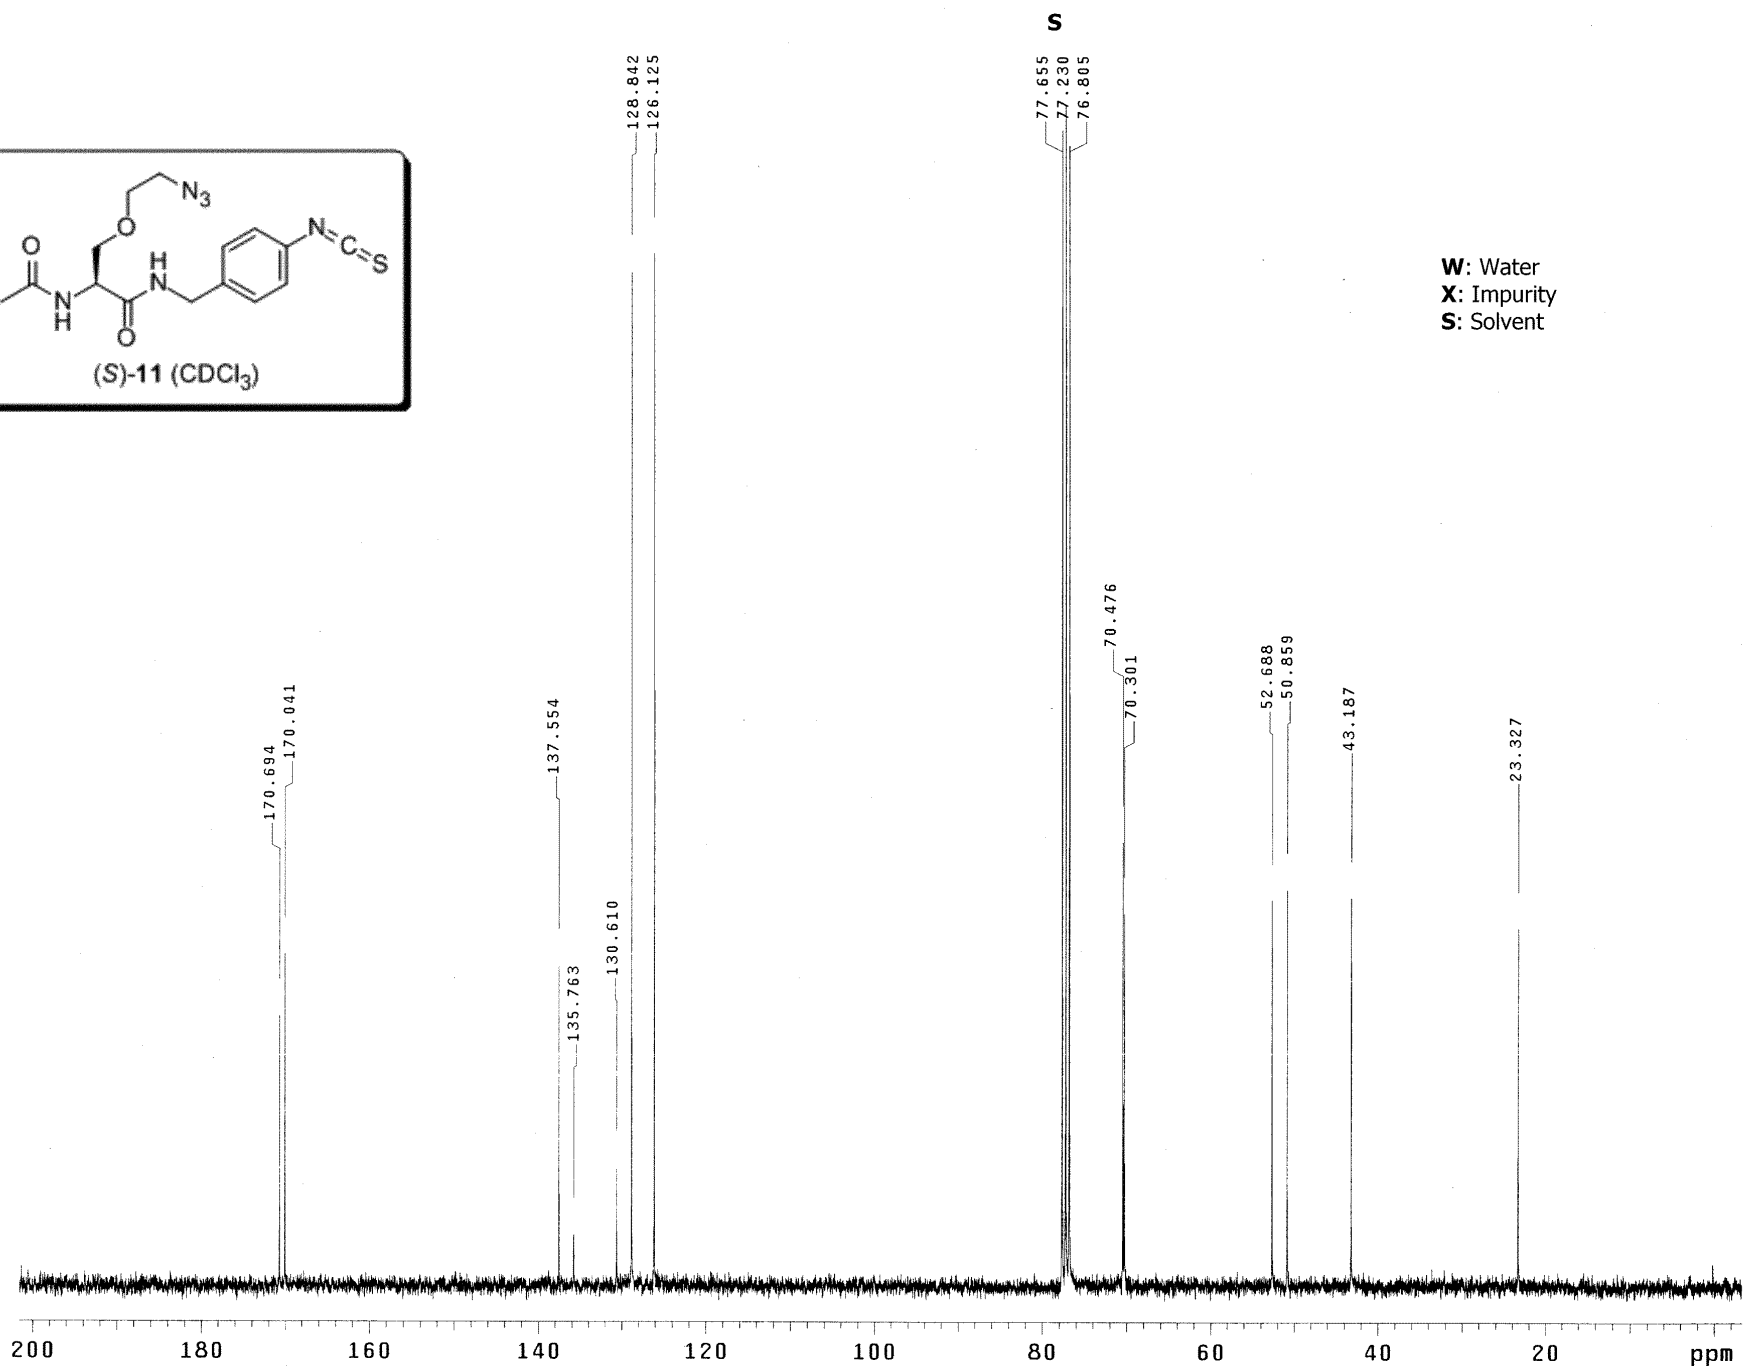

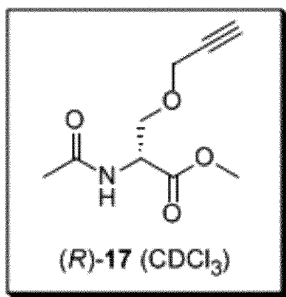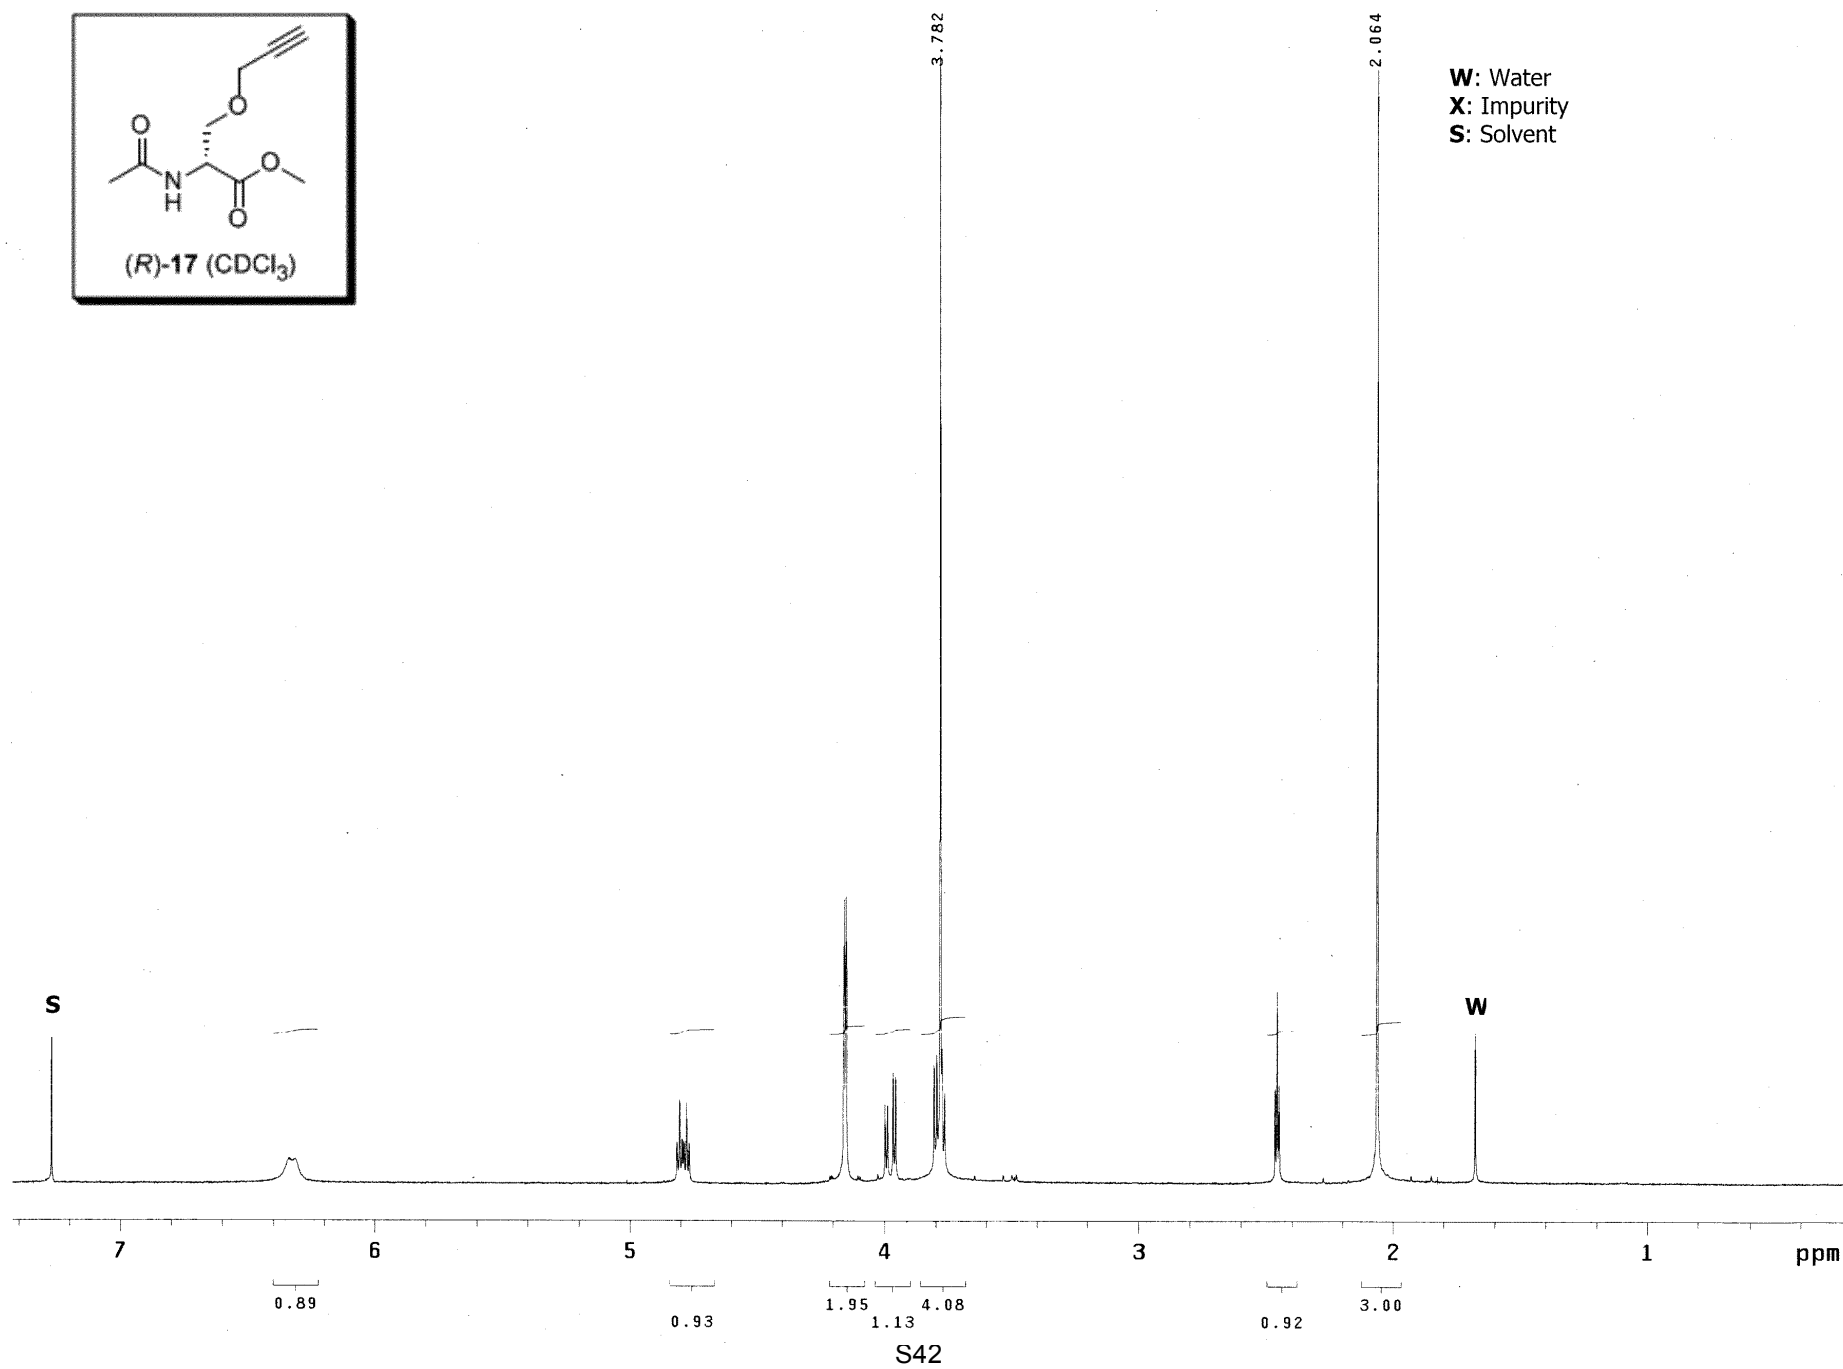

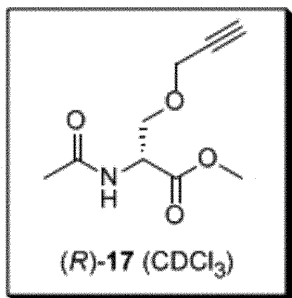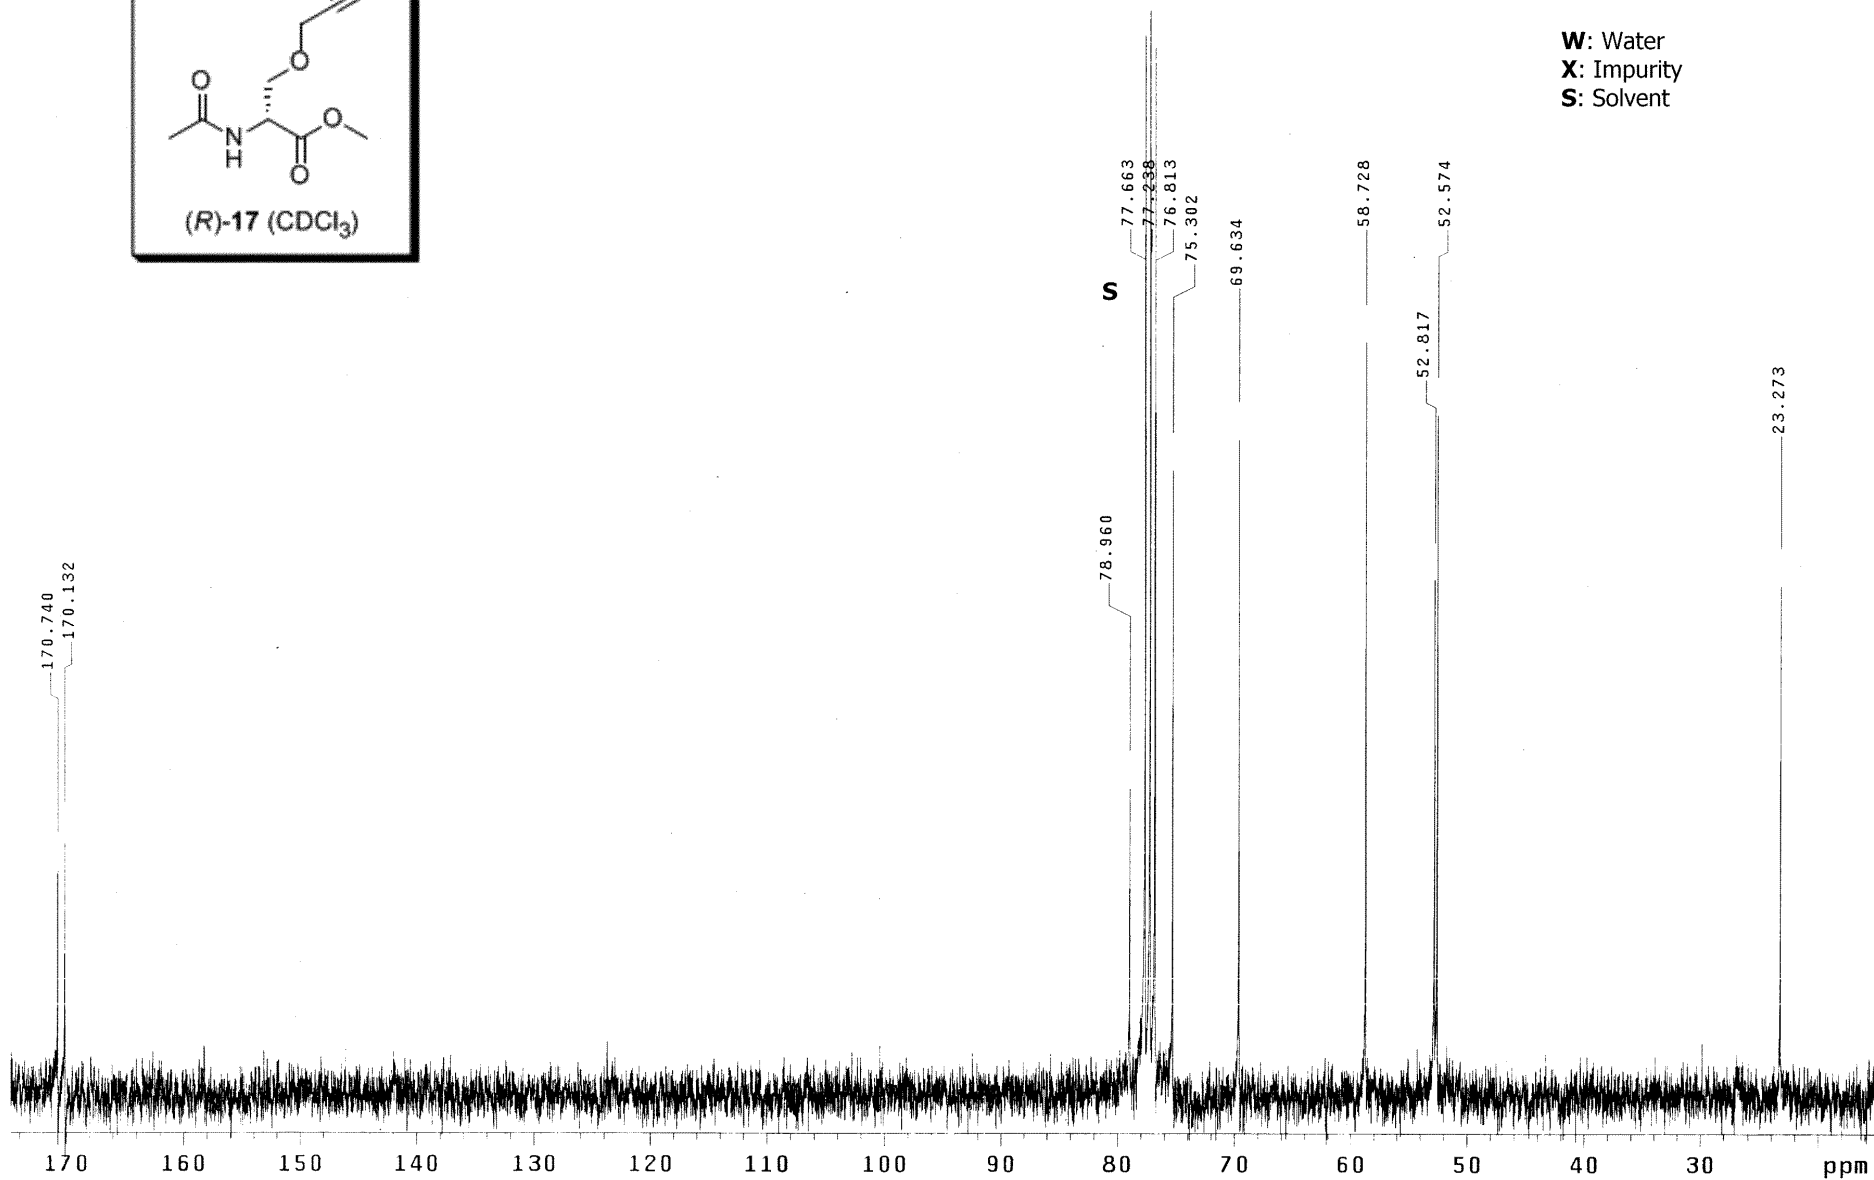

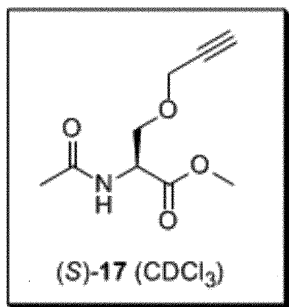

W: Water  
X: Impurity  
S: Solvent

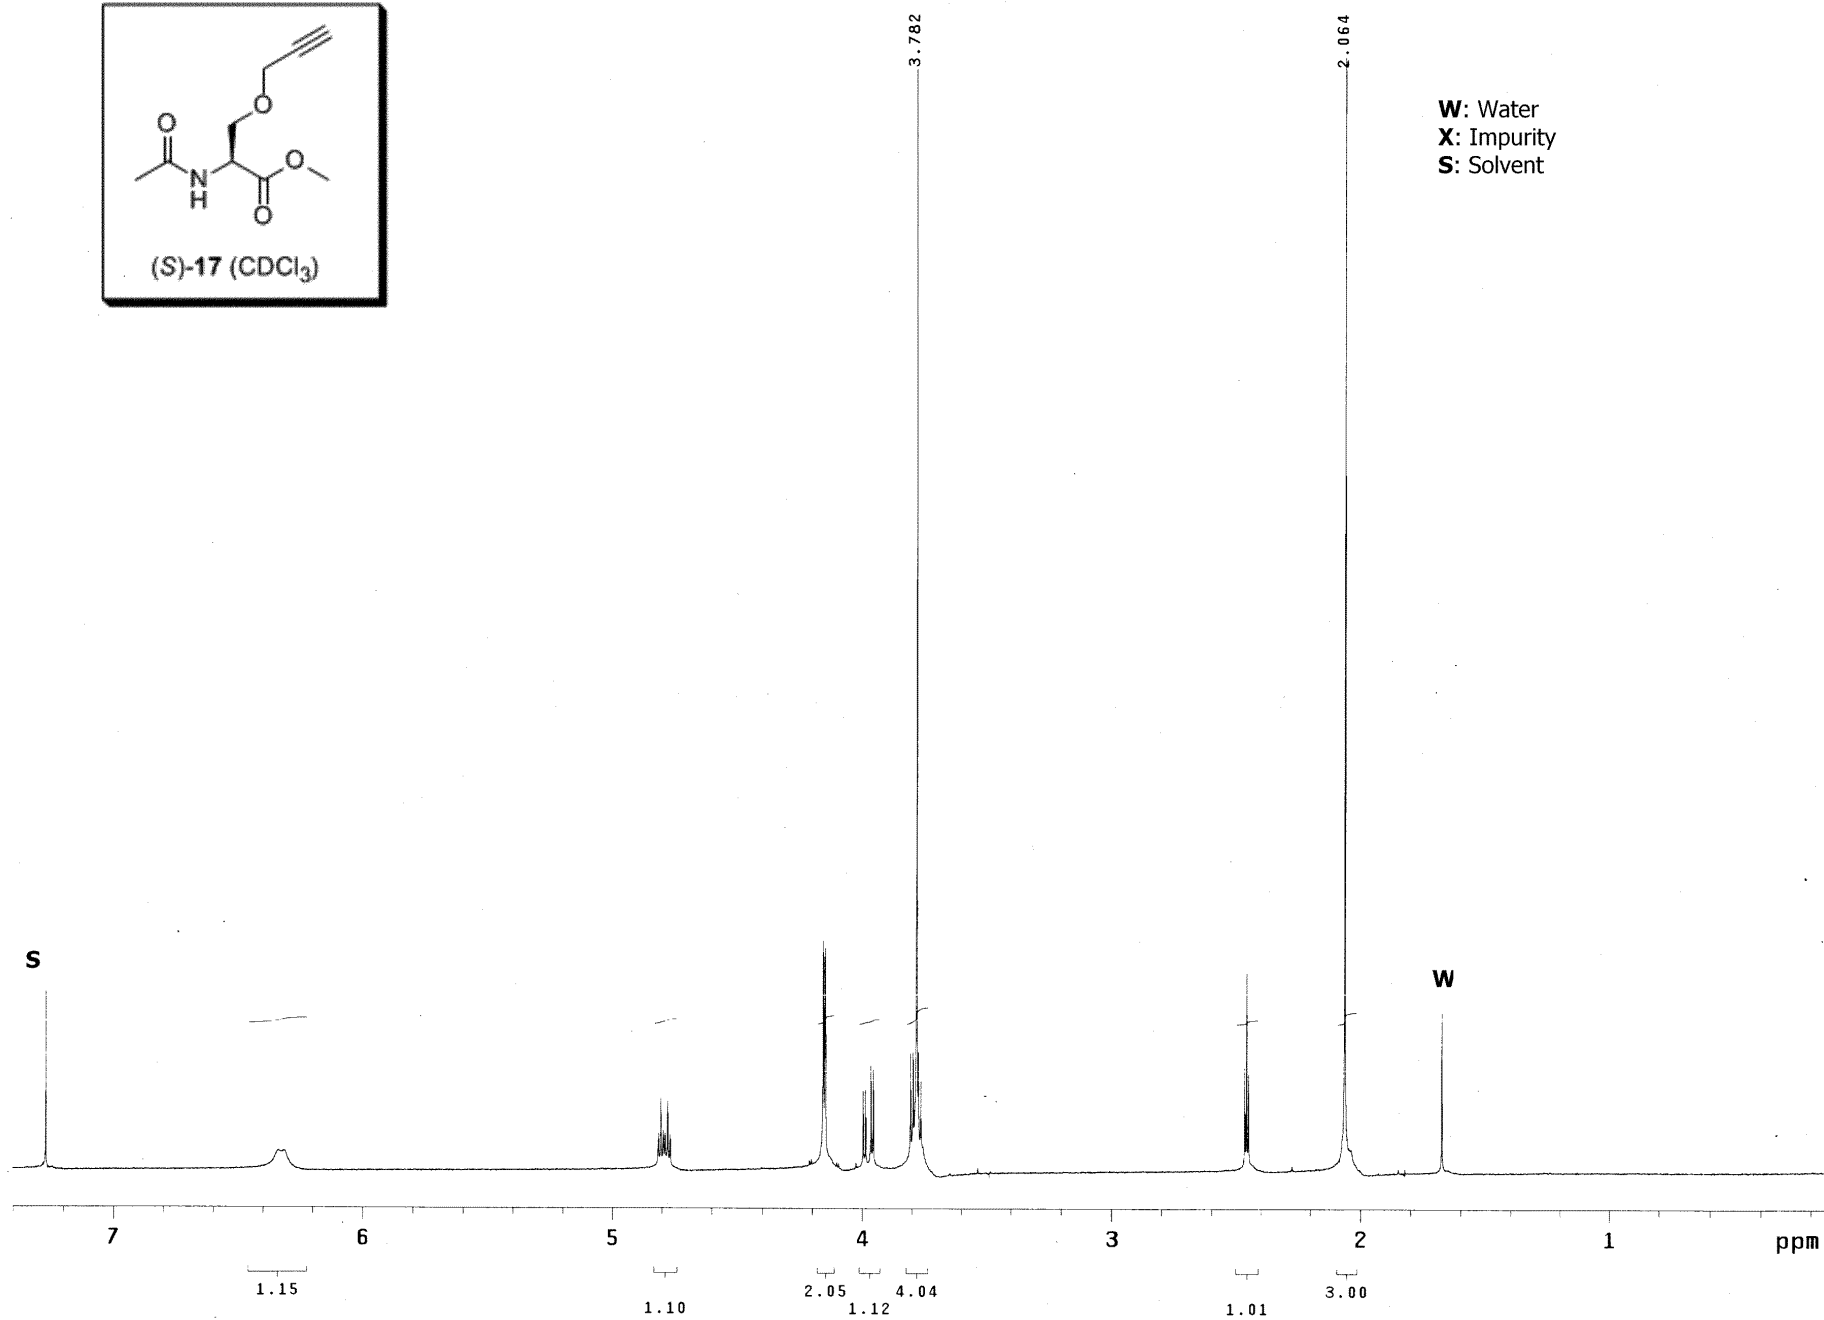

UTT



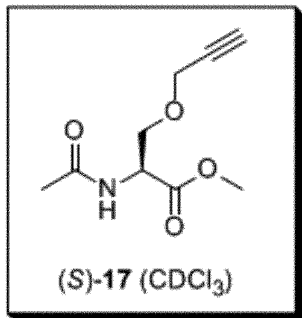

W: Water  
X: Impurity  
S: Solvent

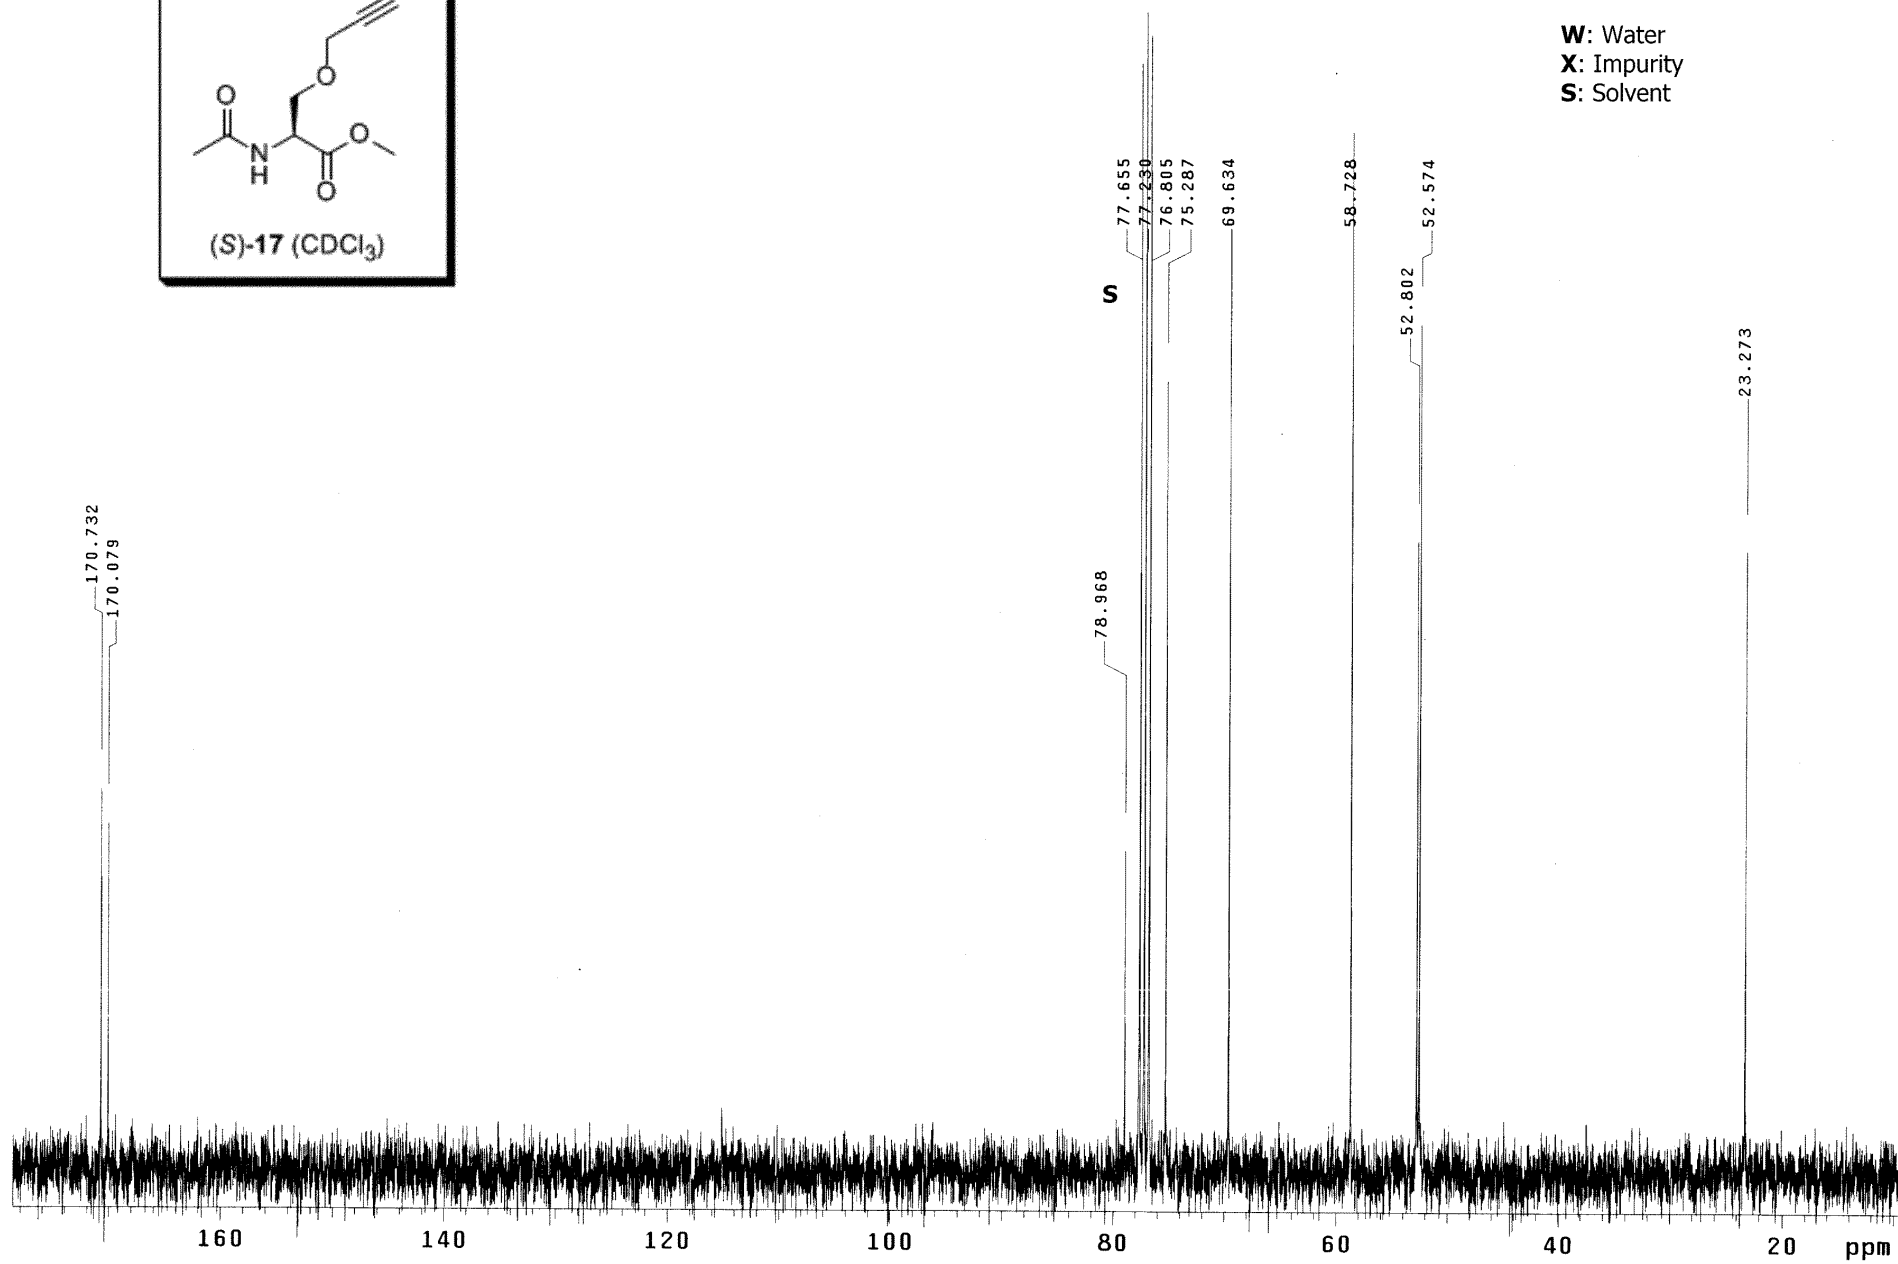

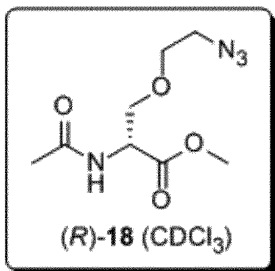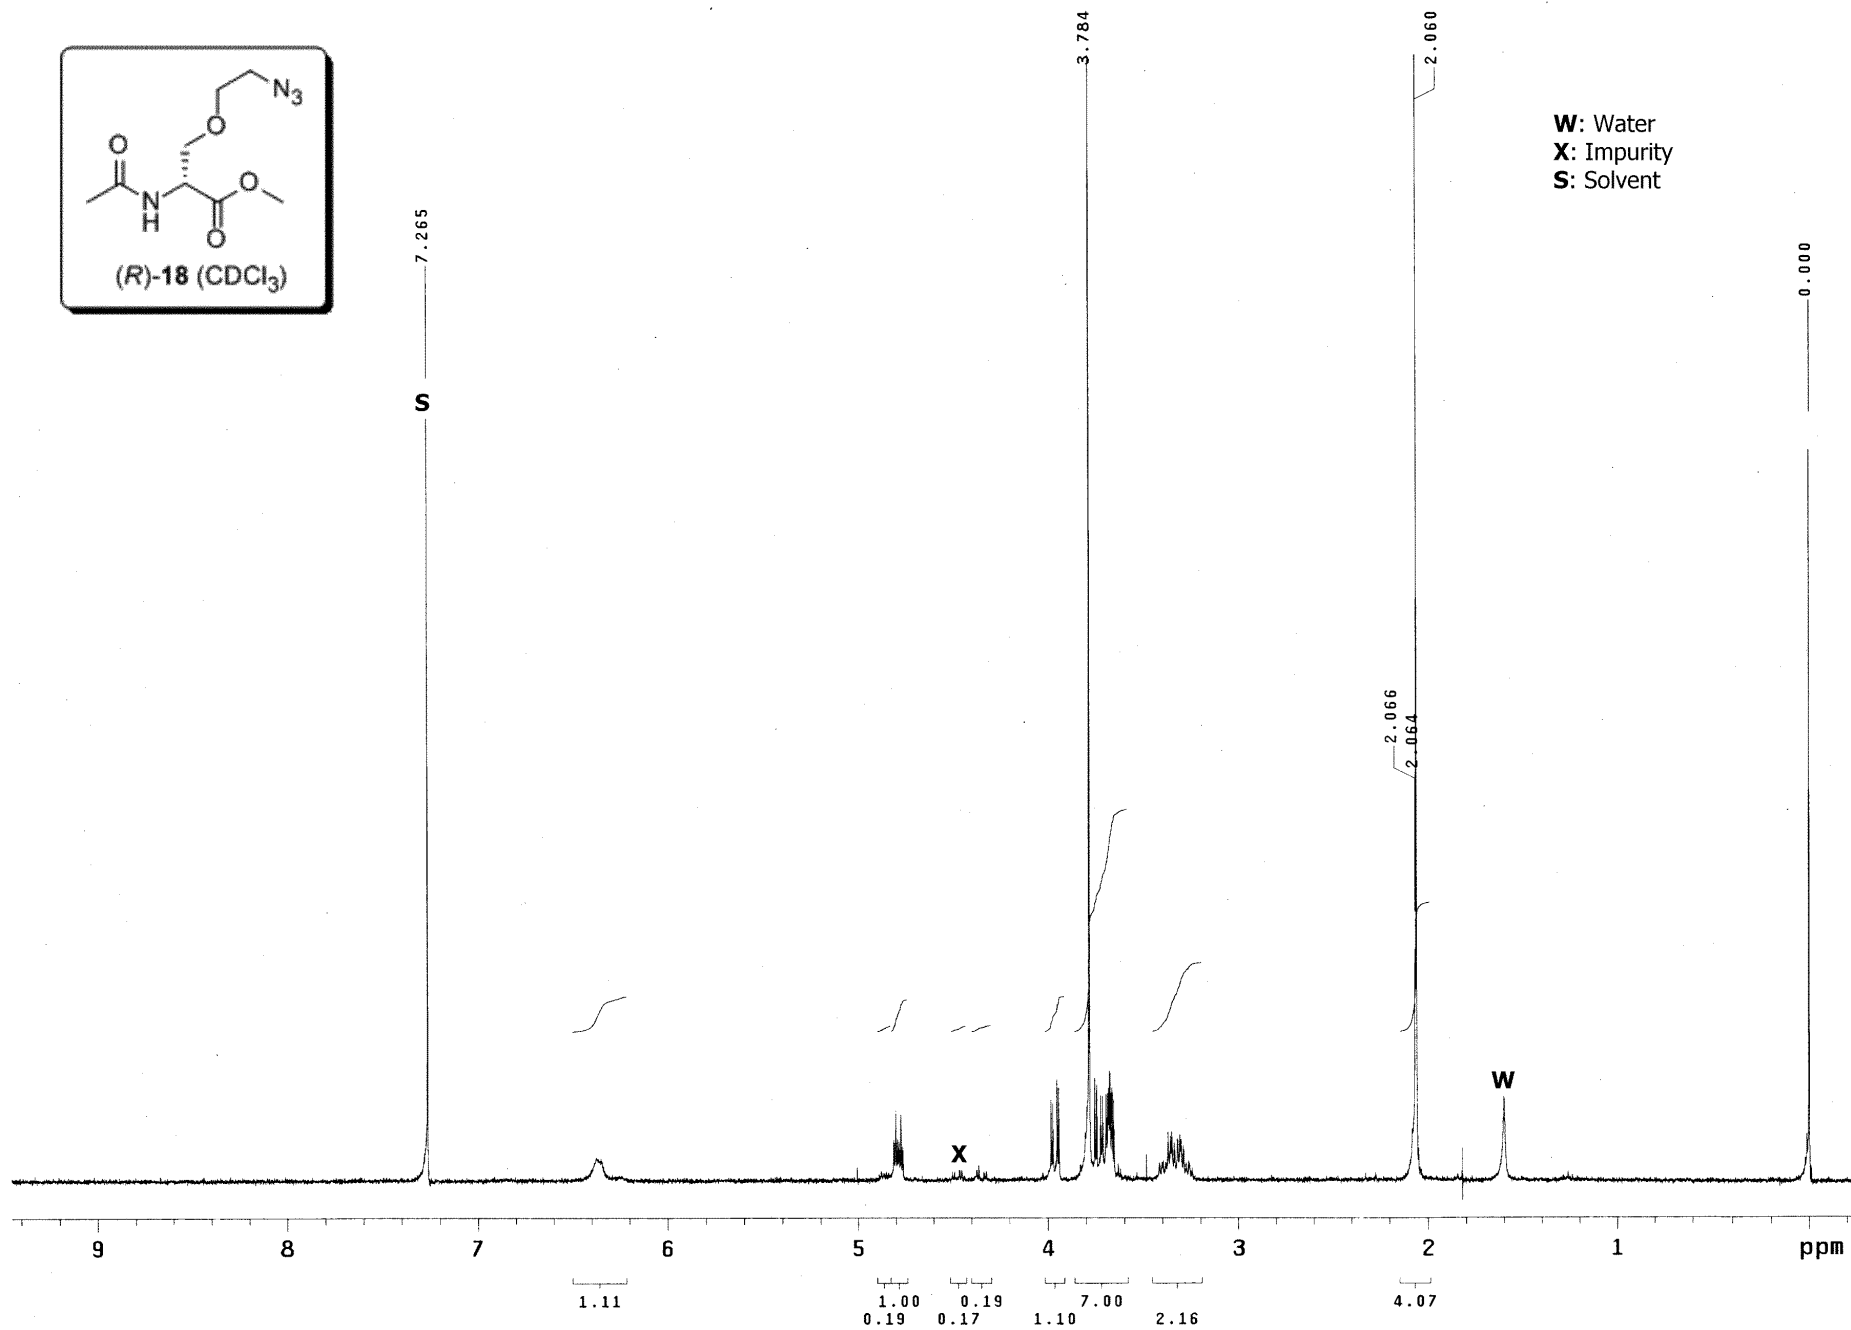

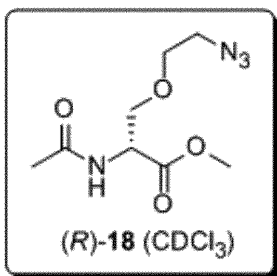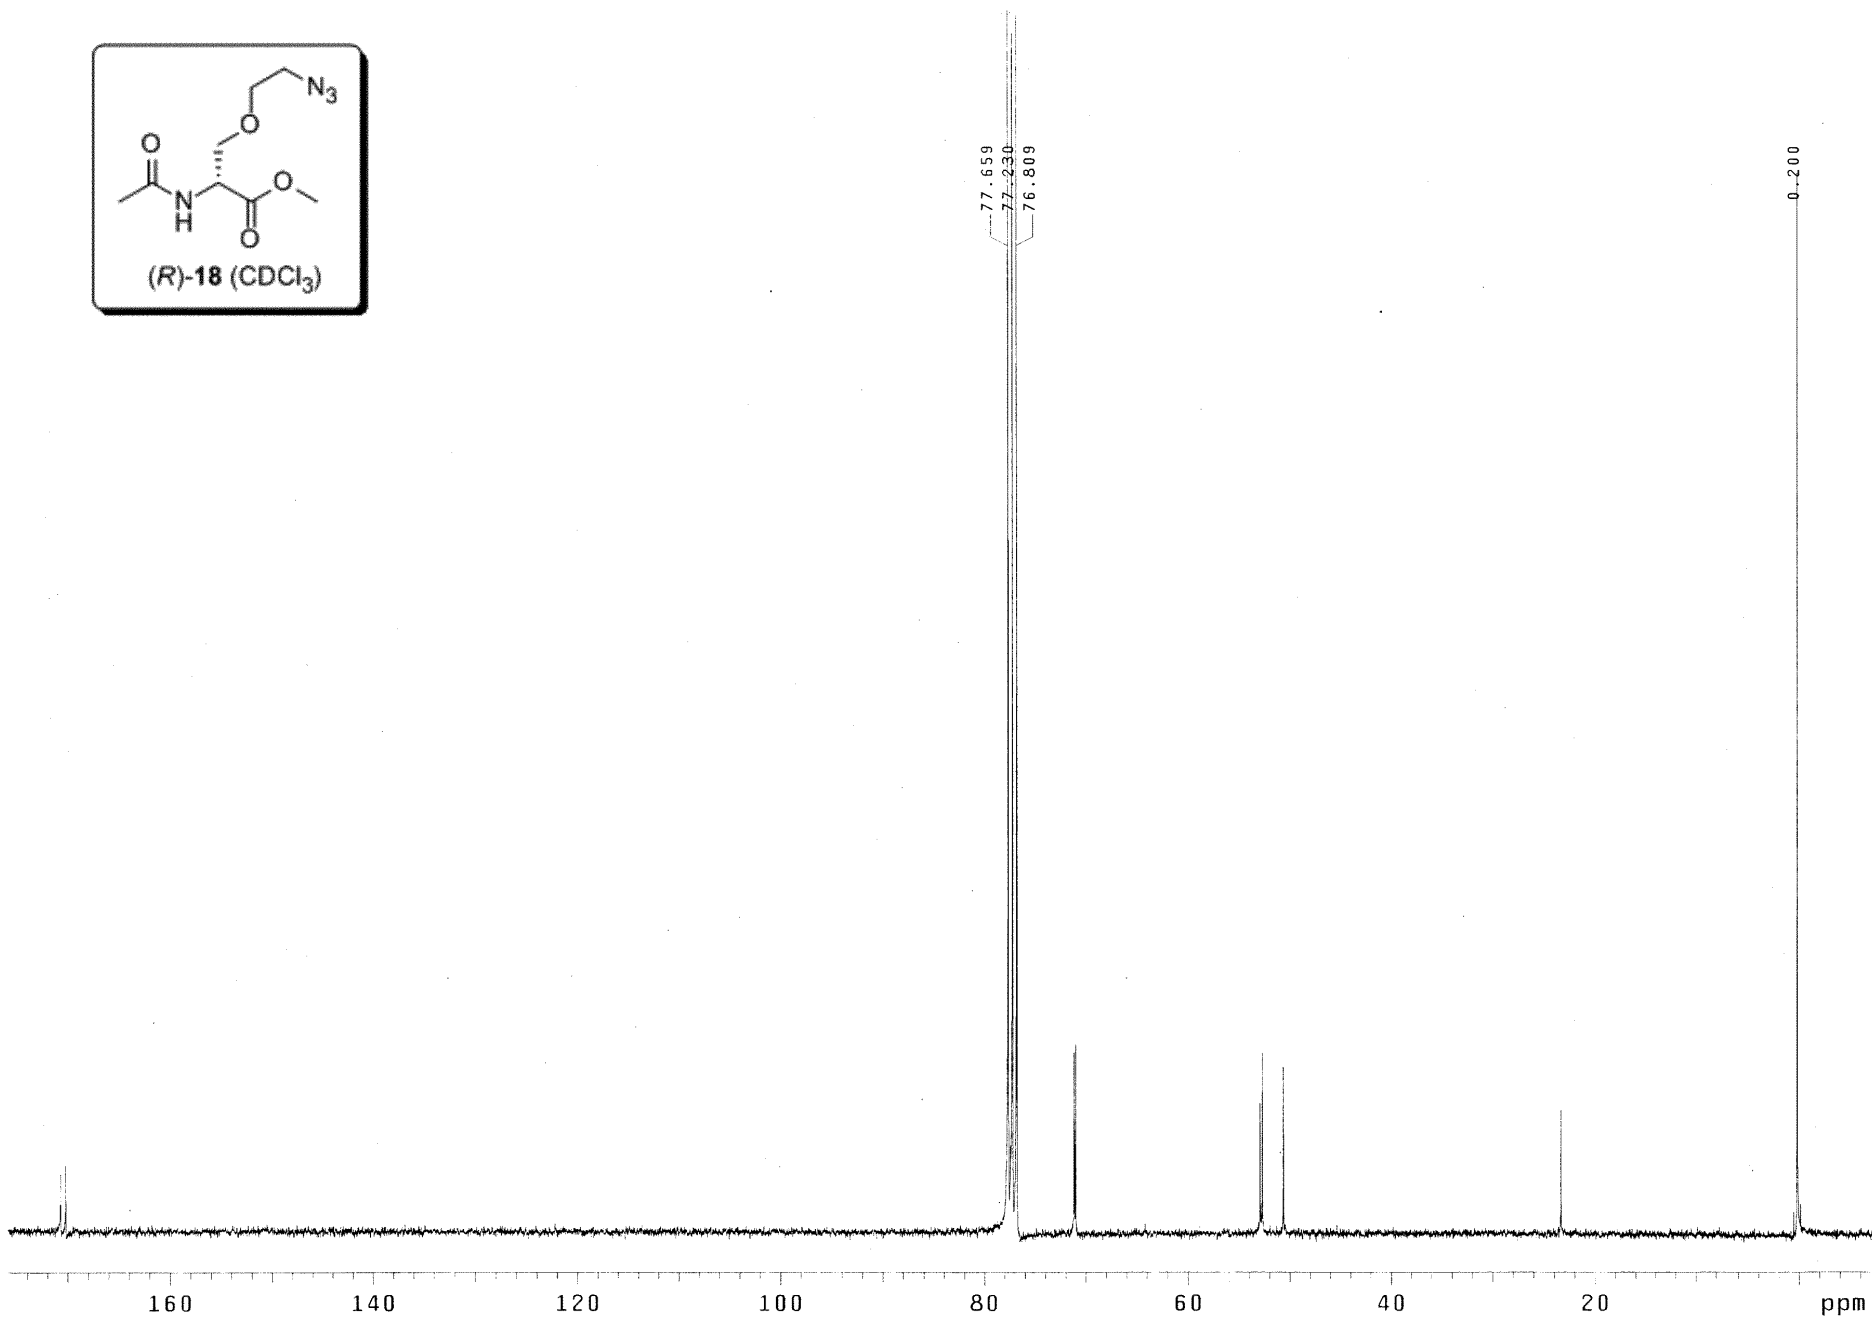

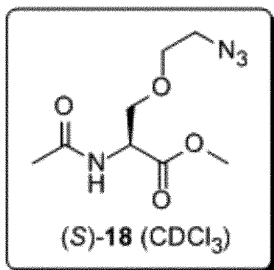

W: Water  
 X: Impurity  
 S: Solvent

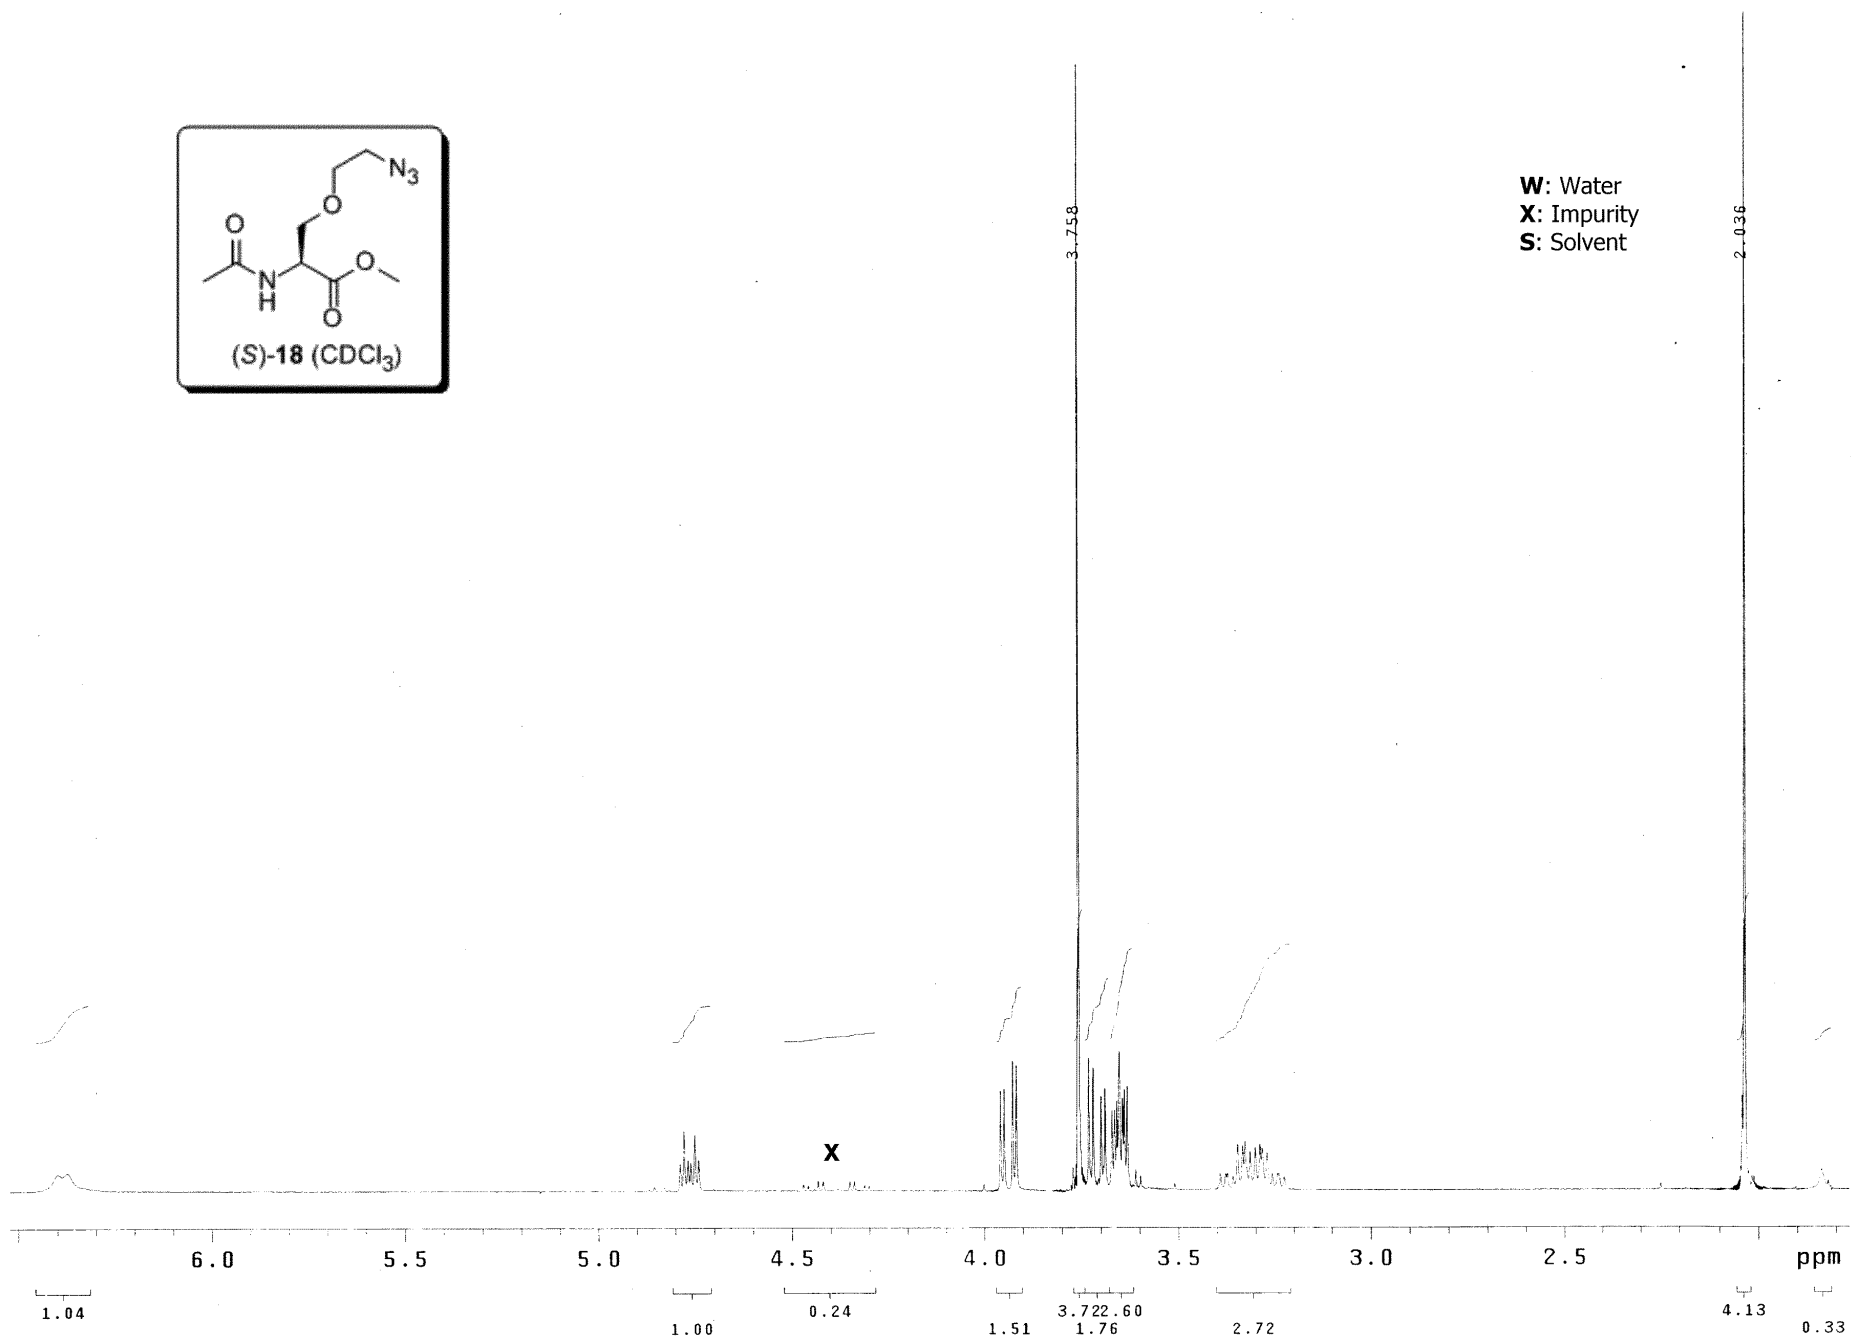

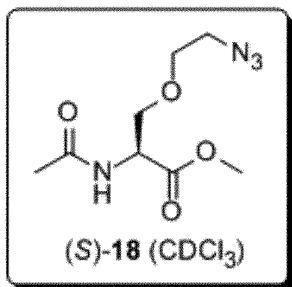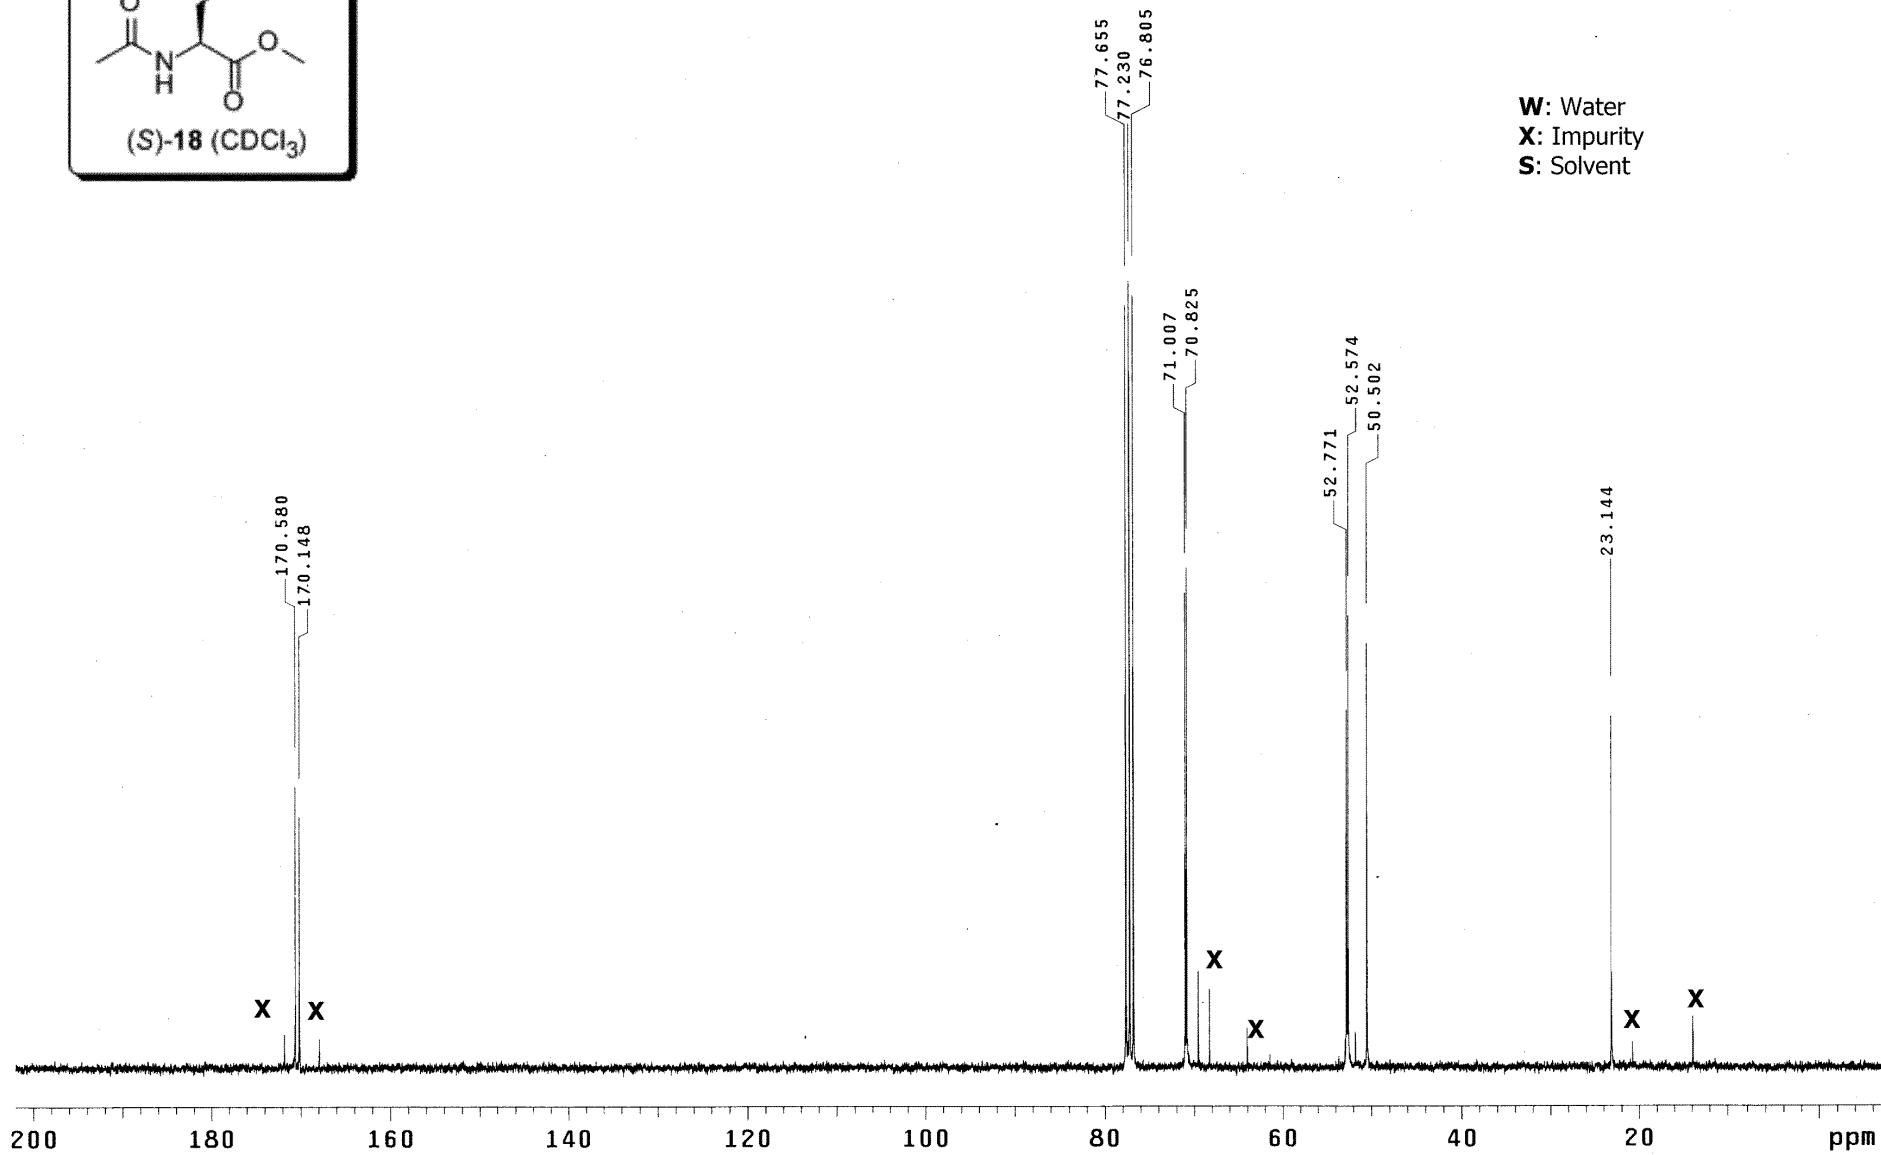

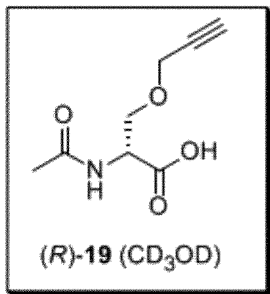

**W:** Water  
**X:** Impurity  
**S:** Solvent

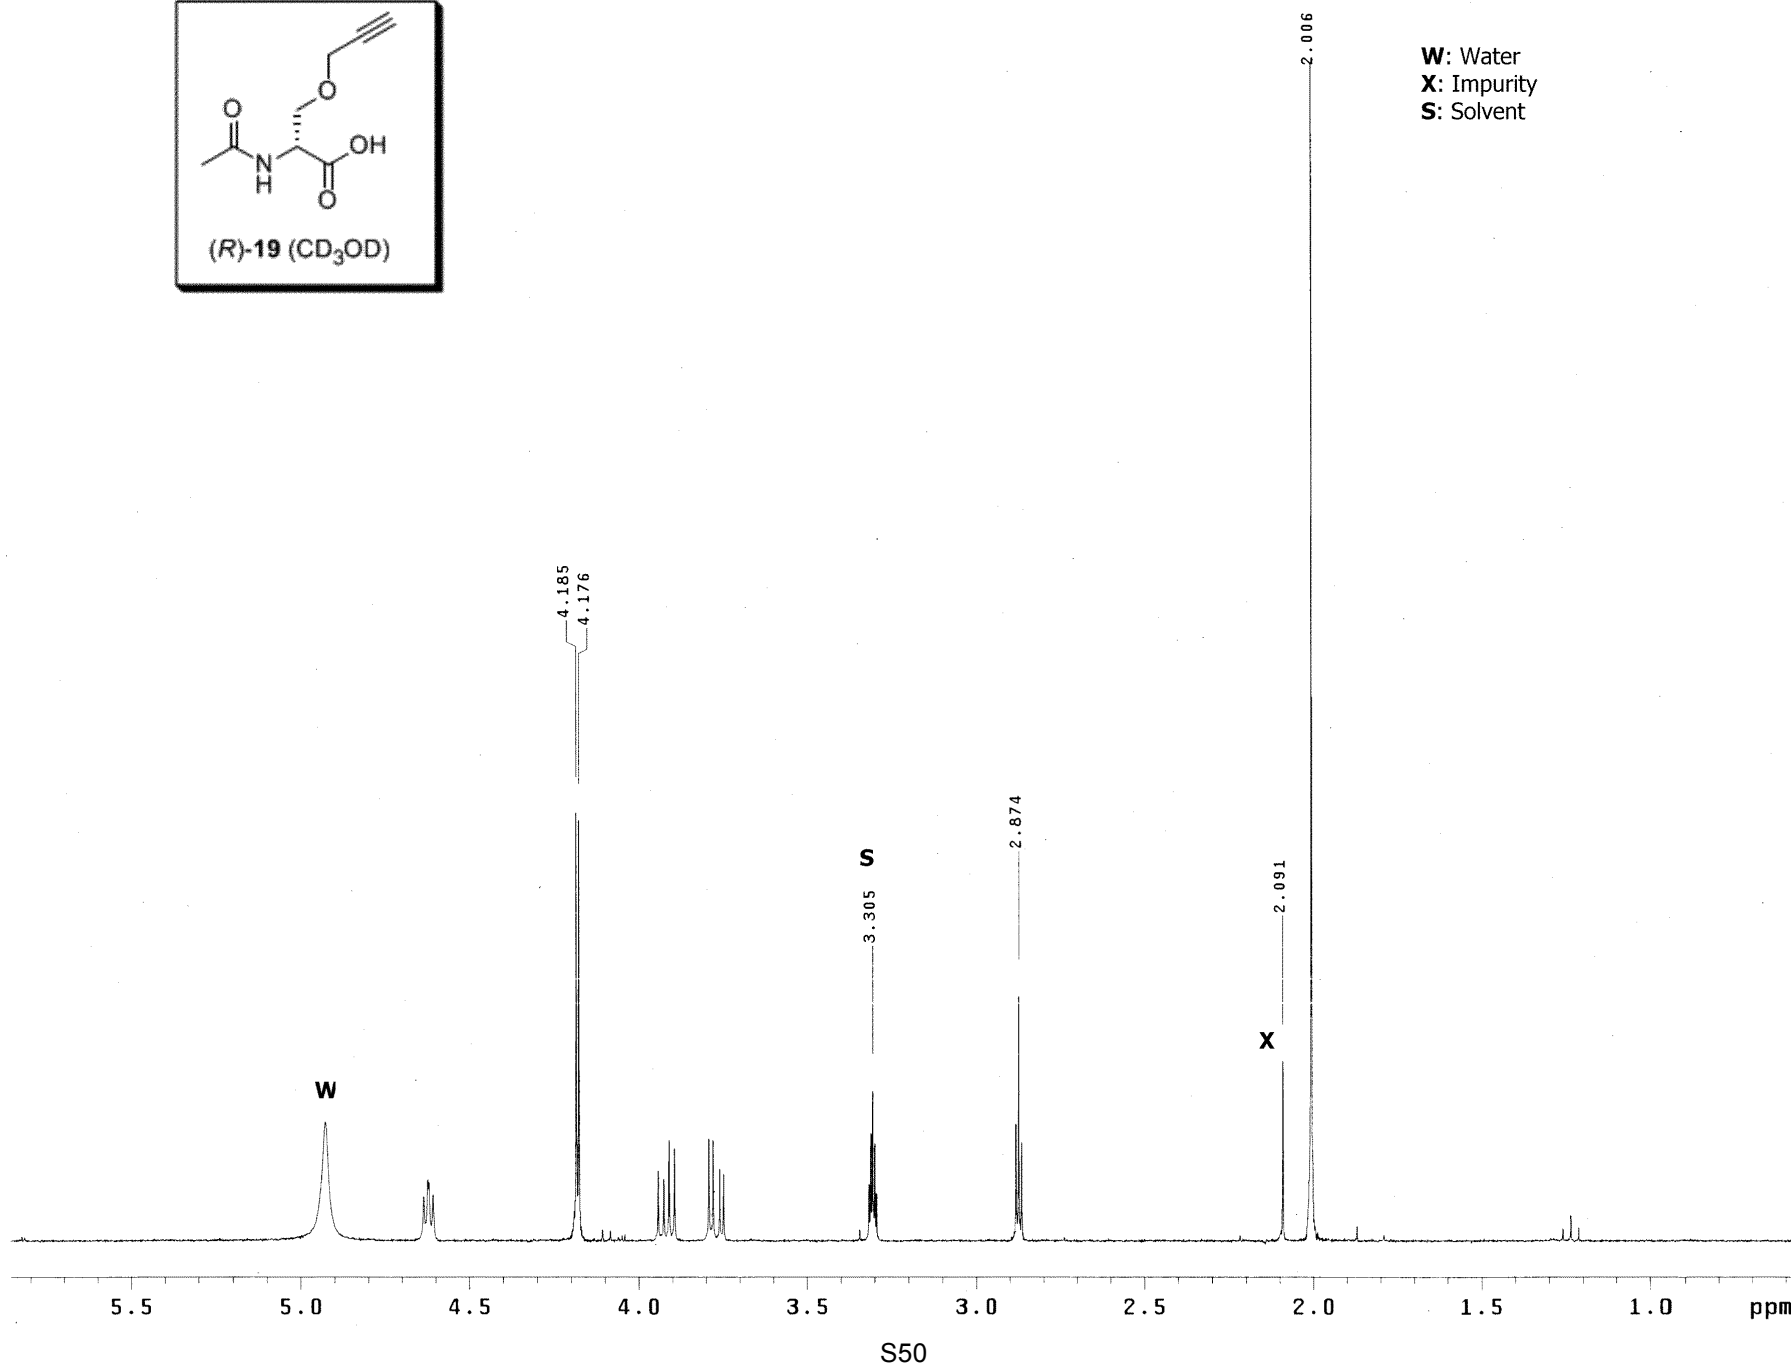

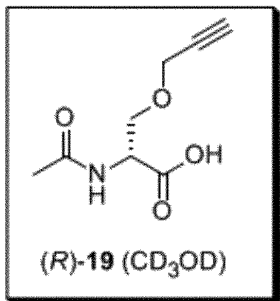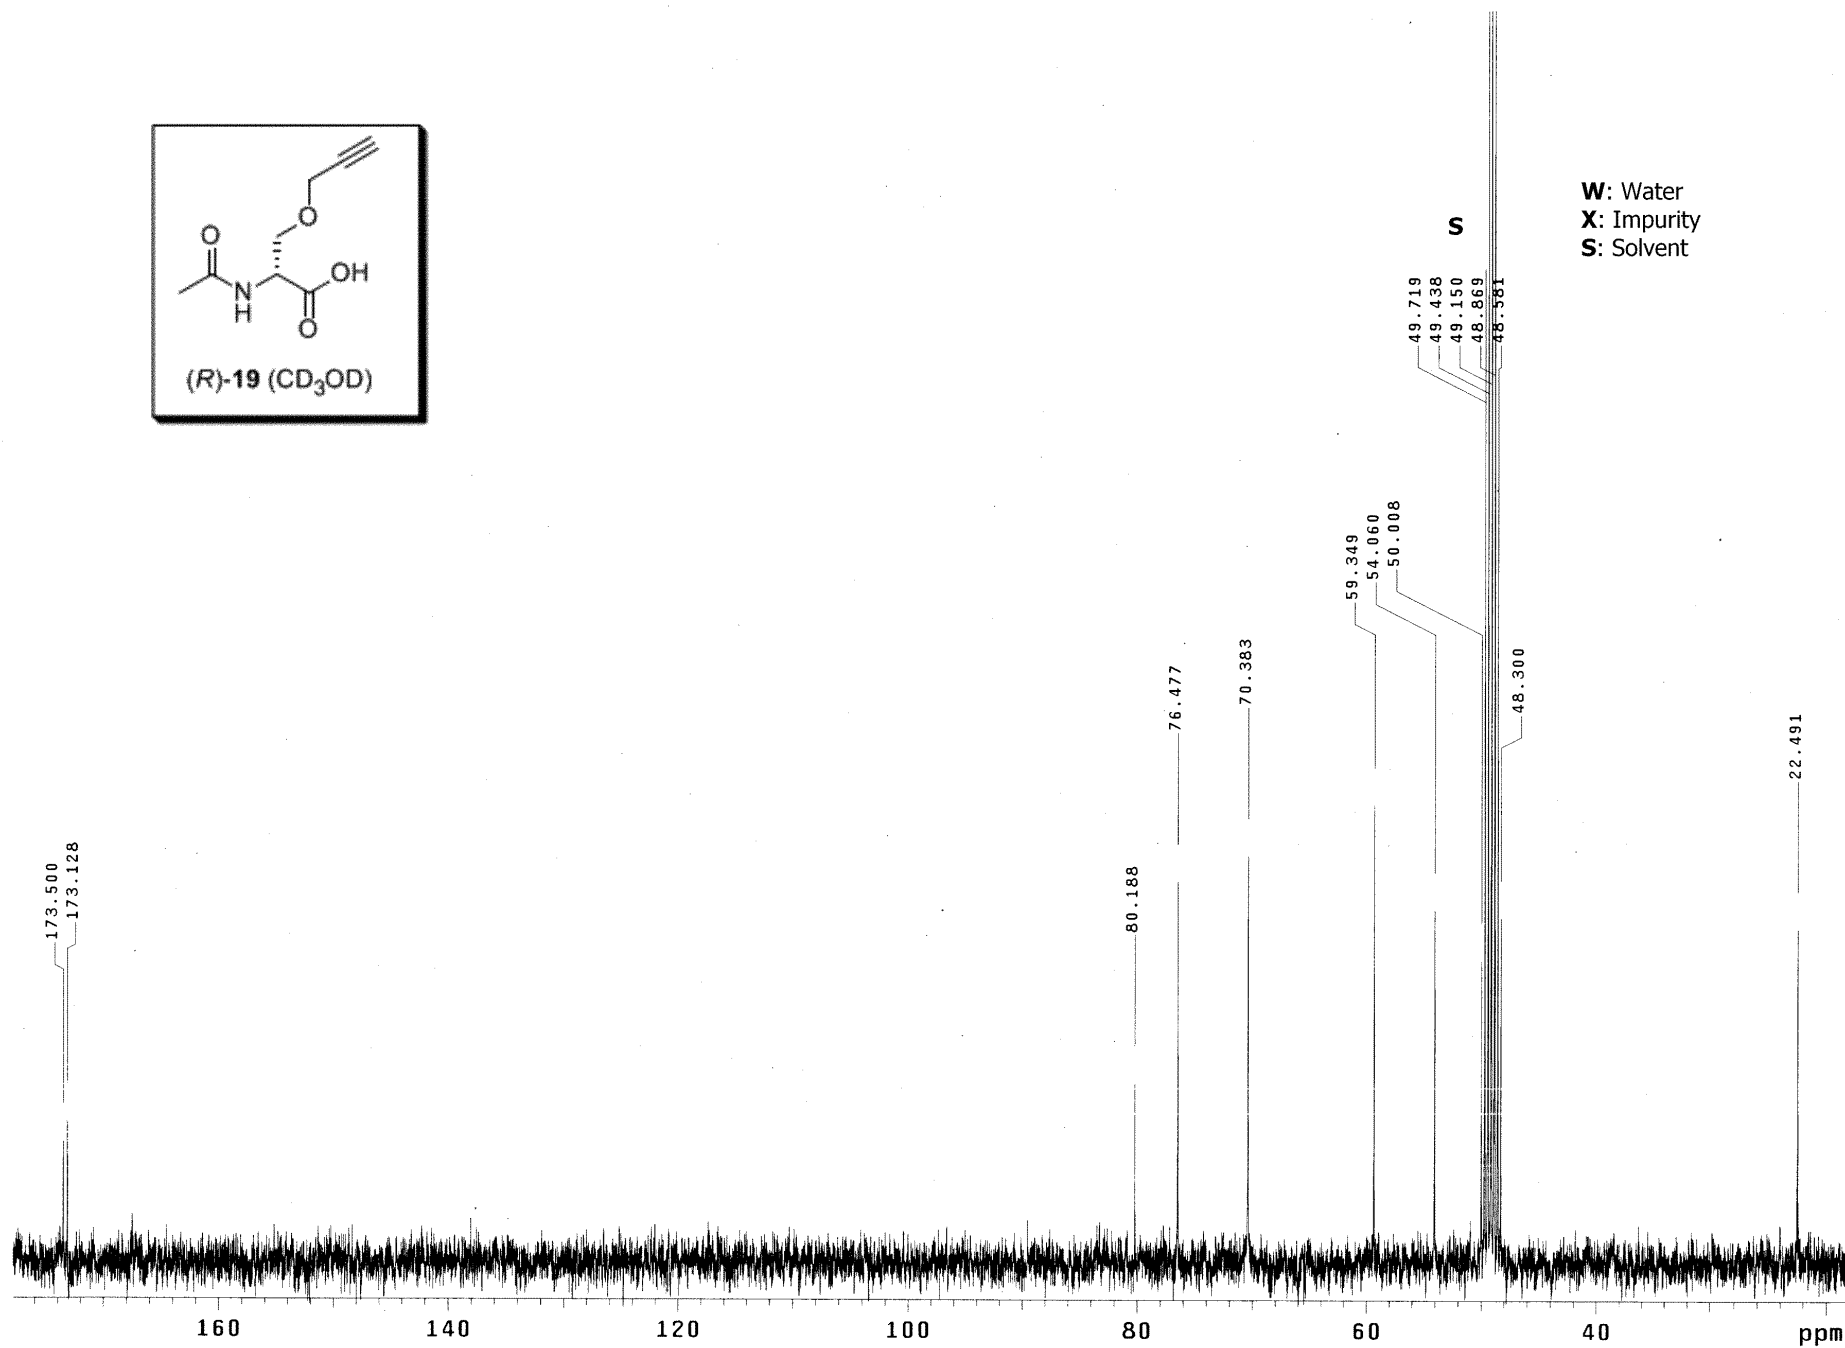

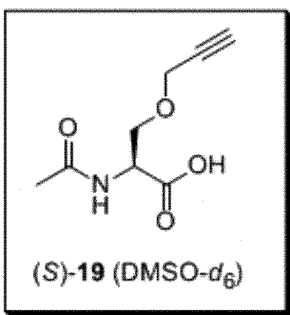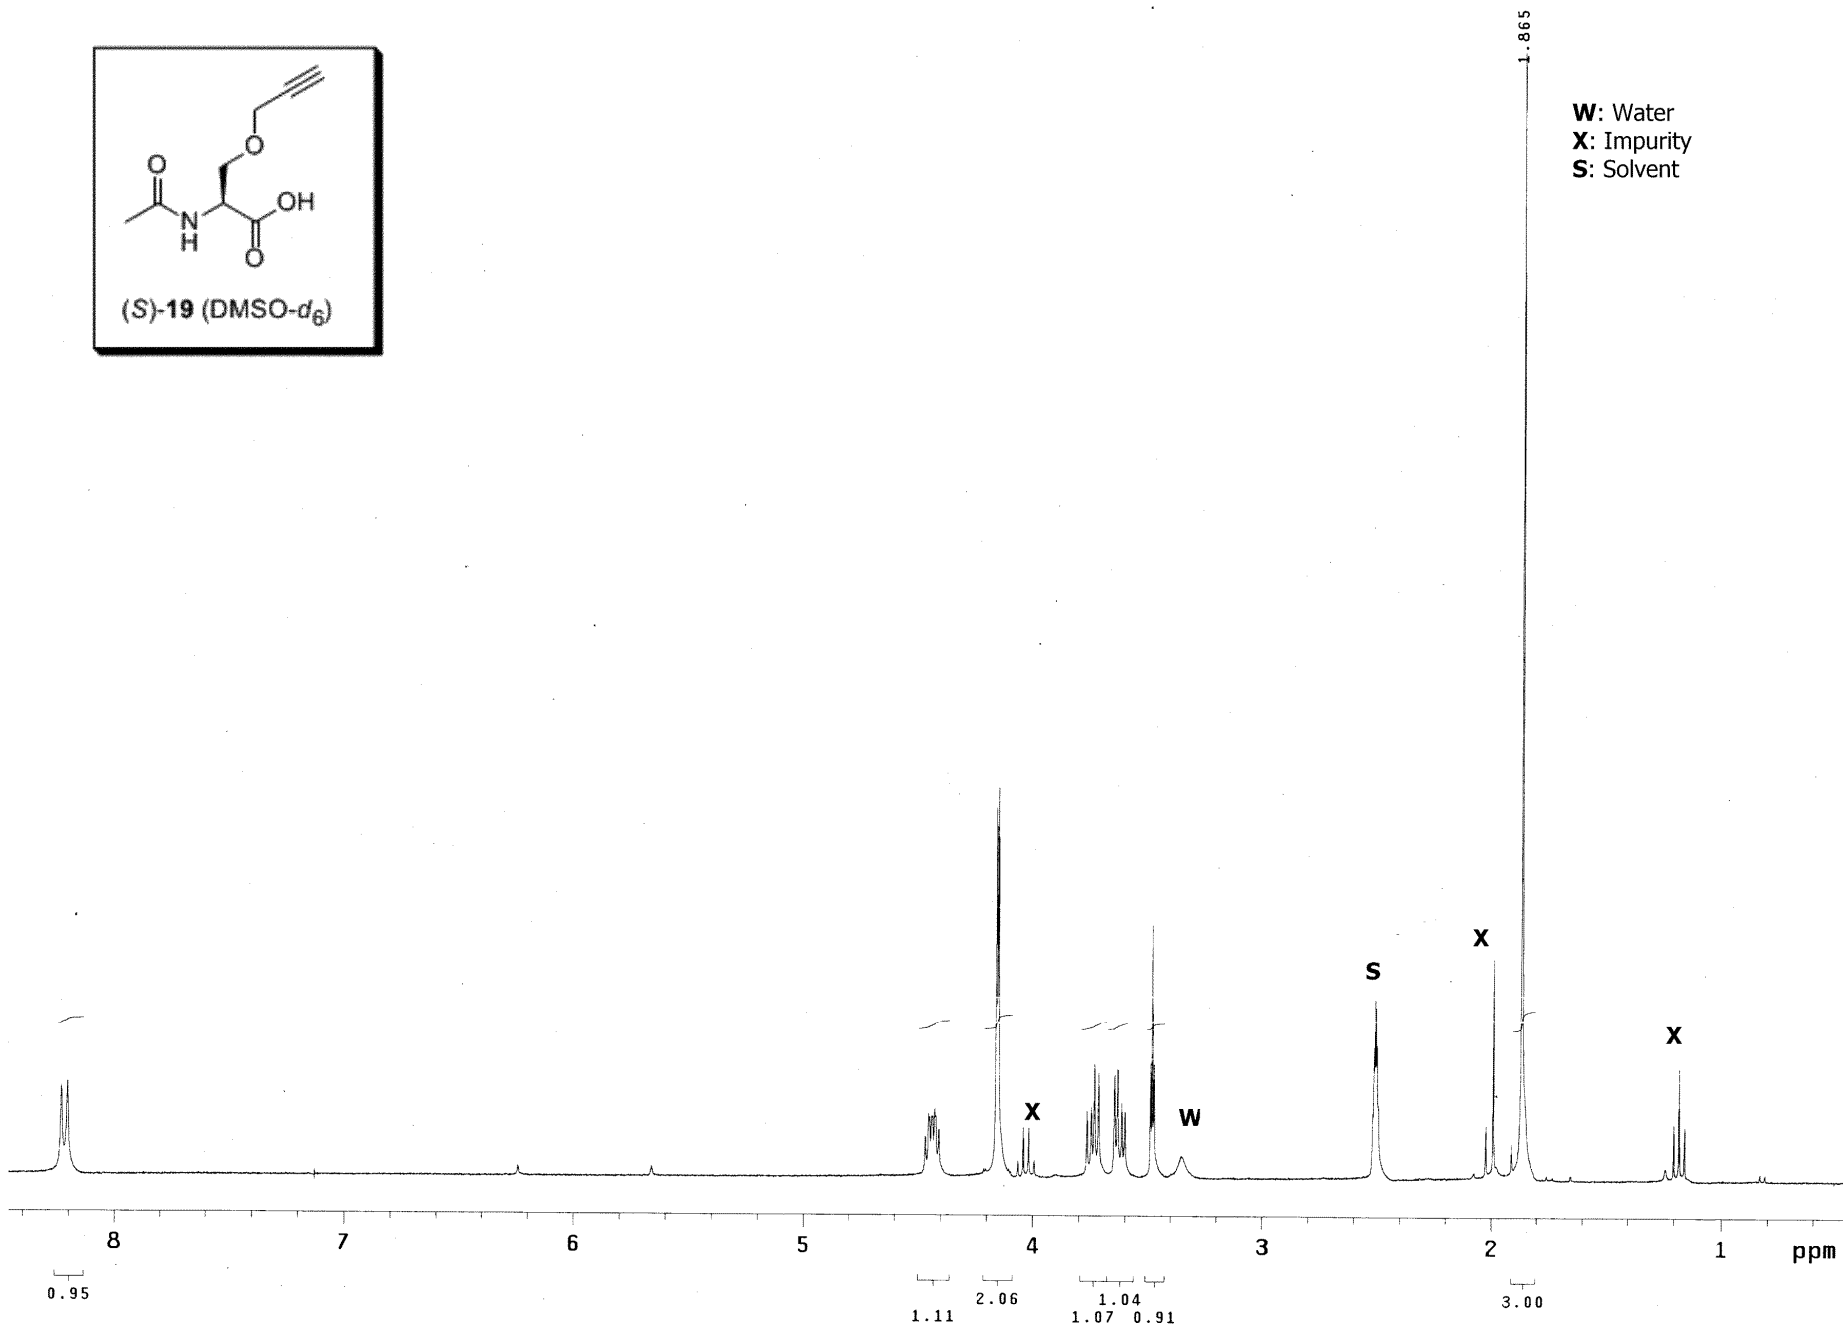

S52



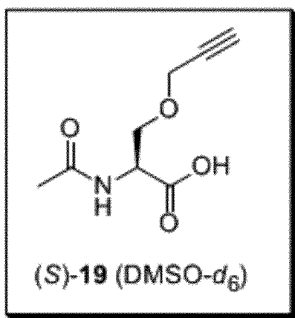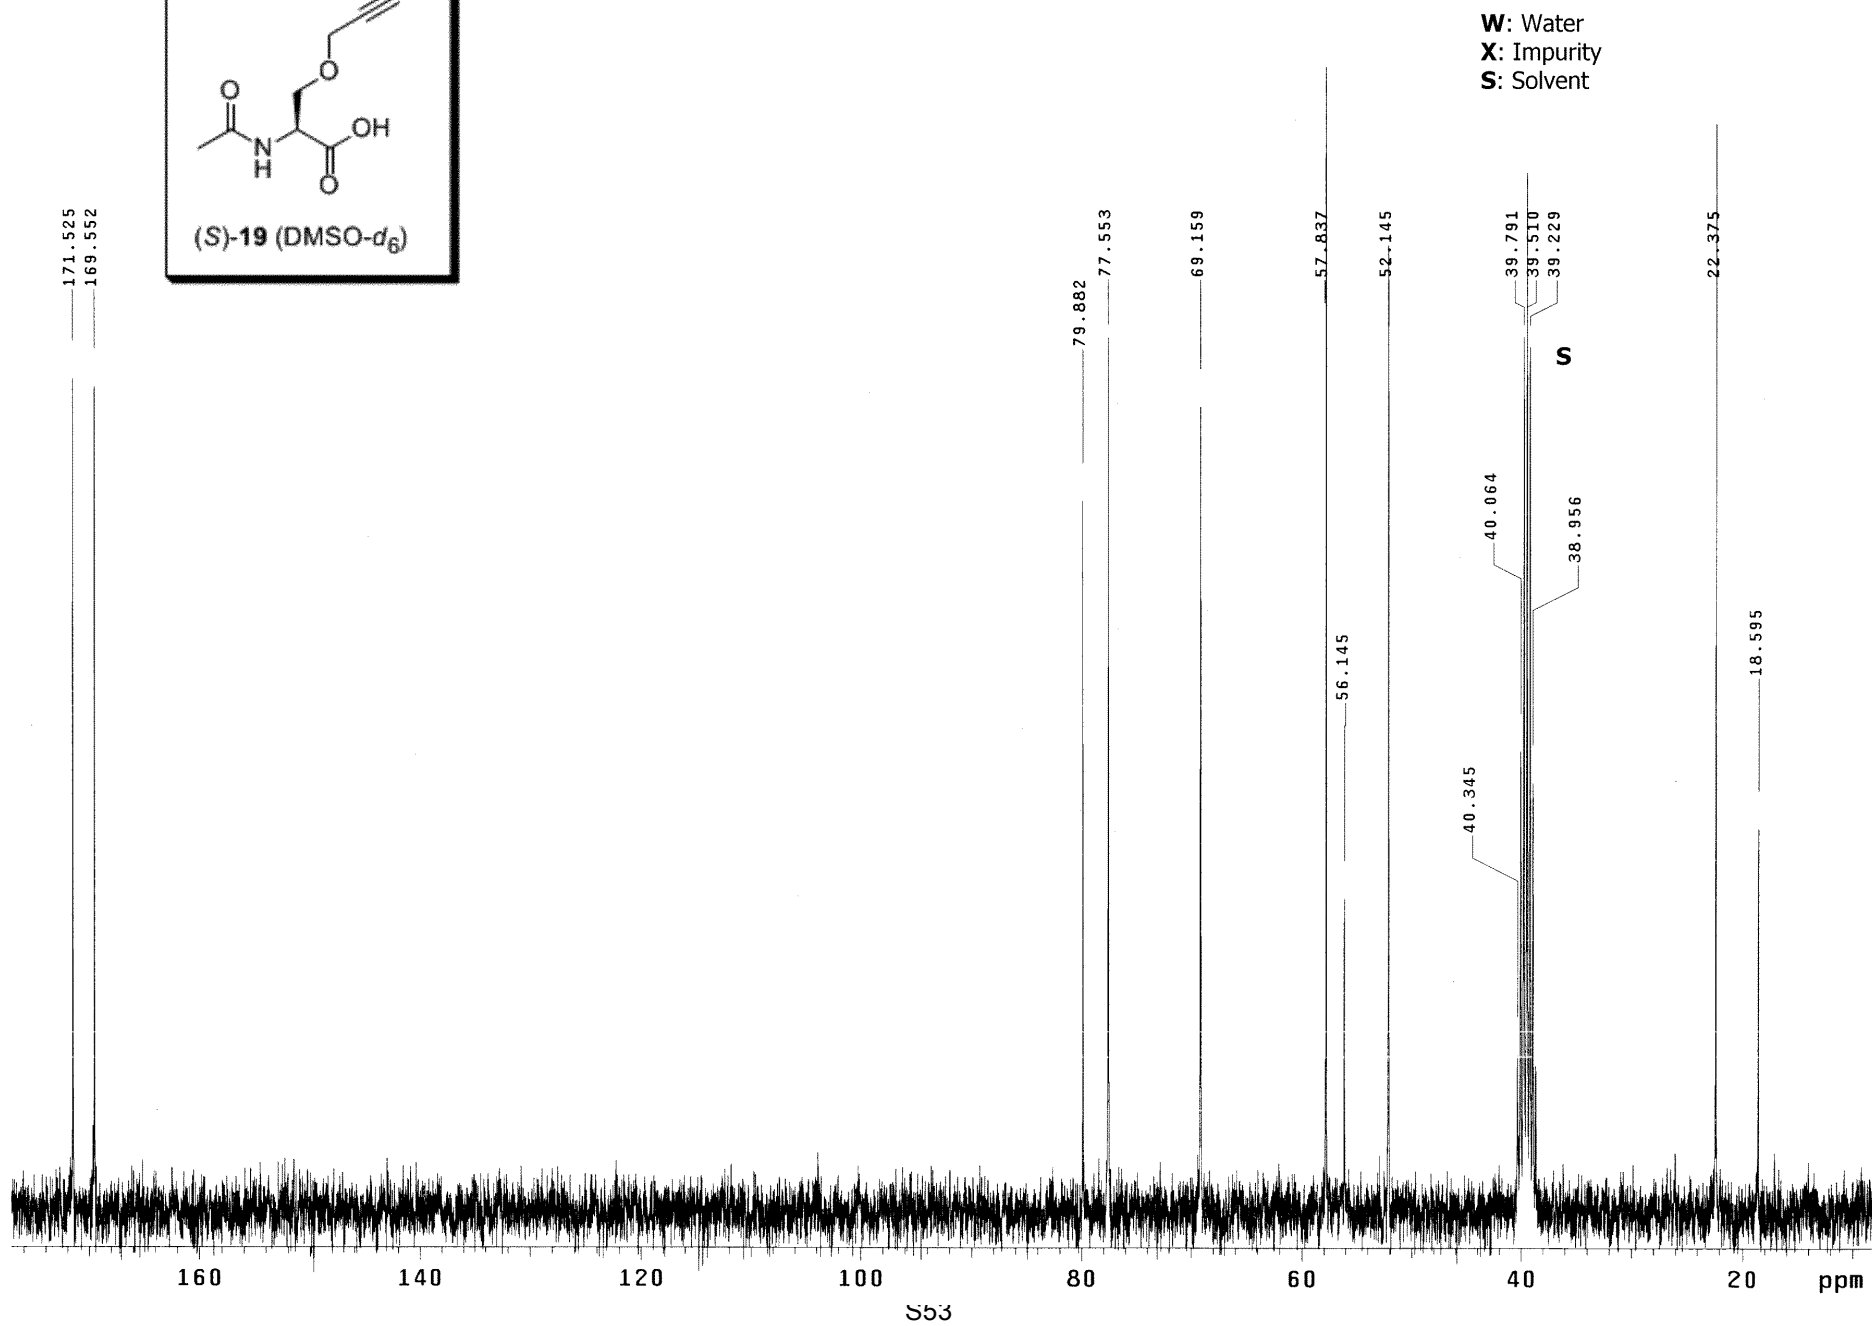

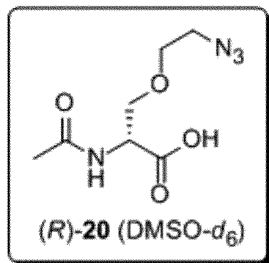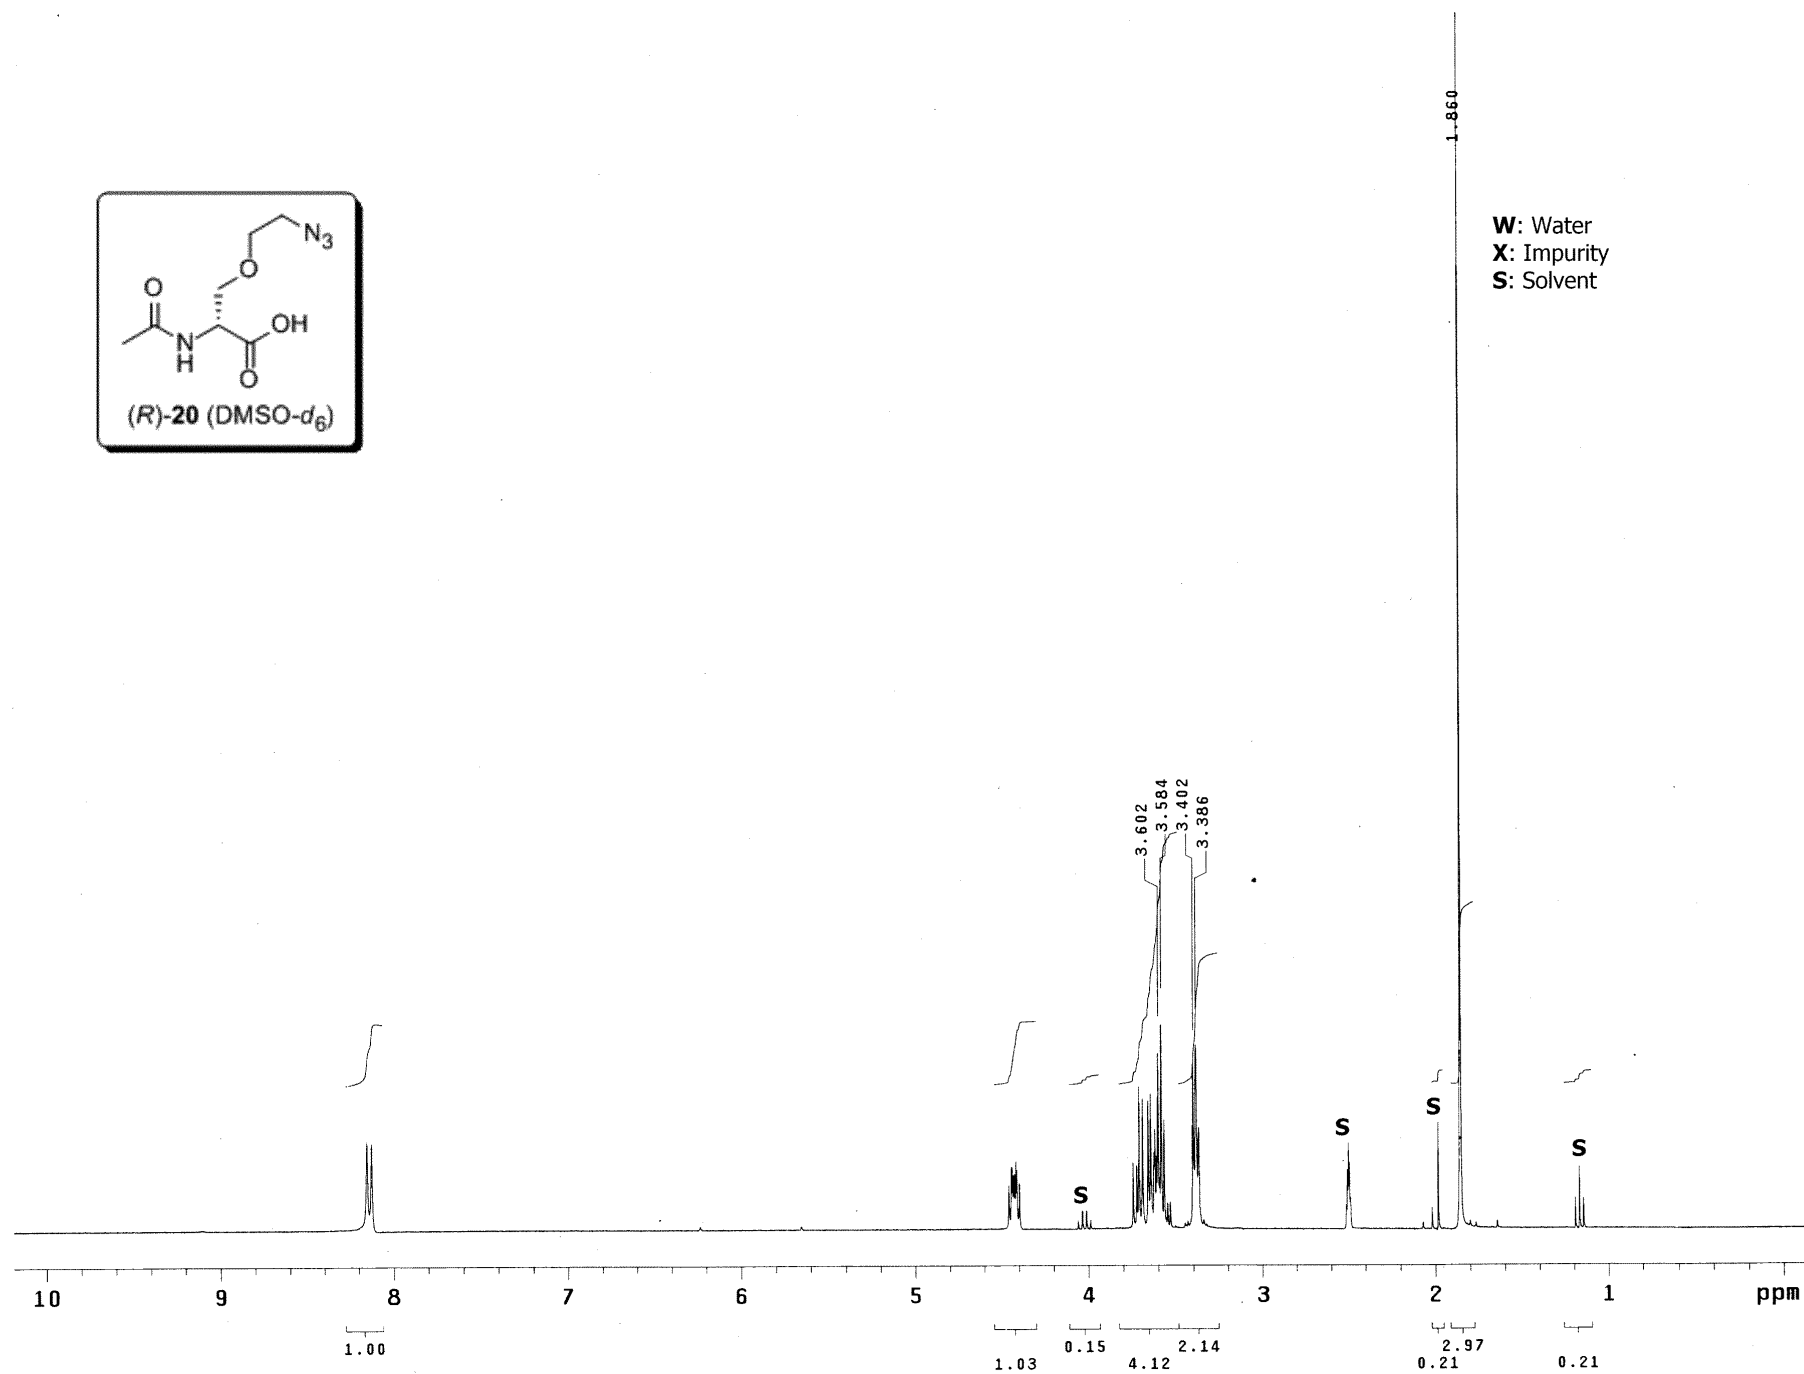

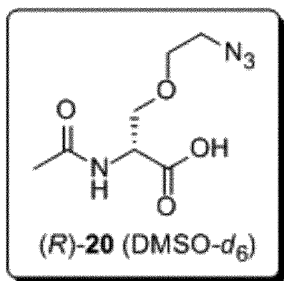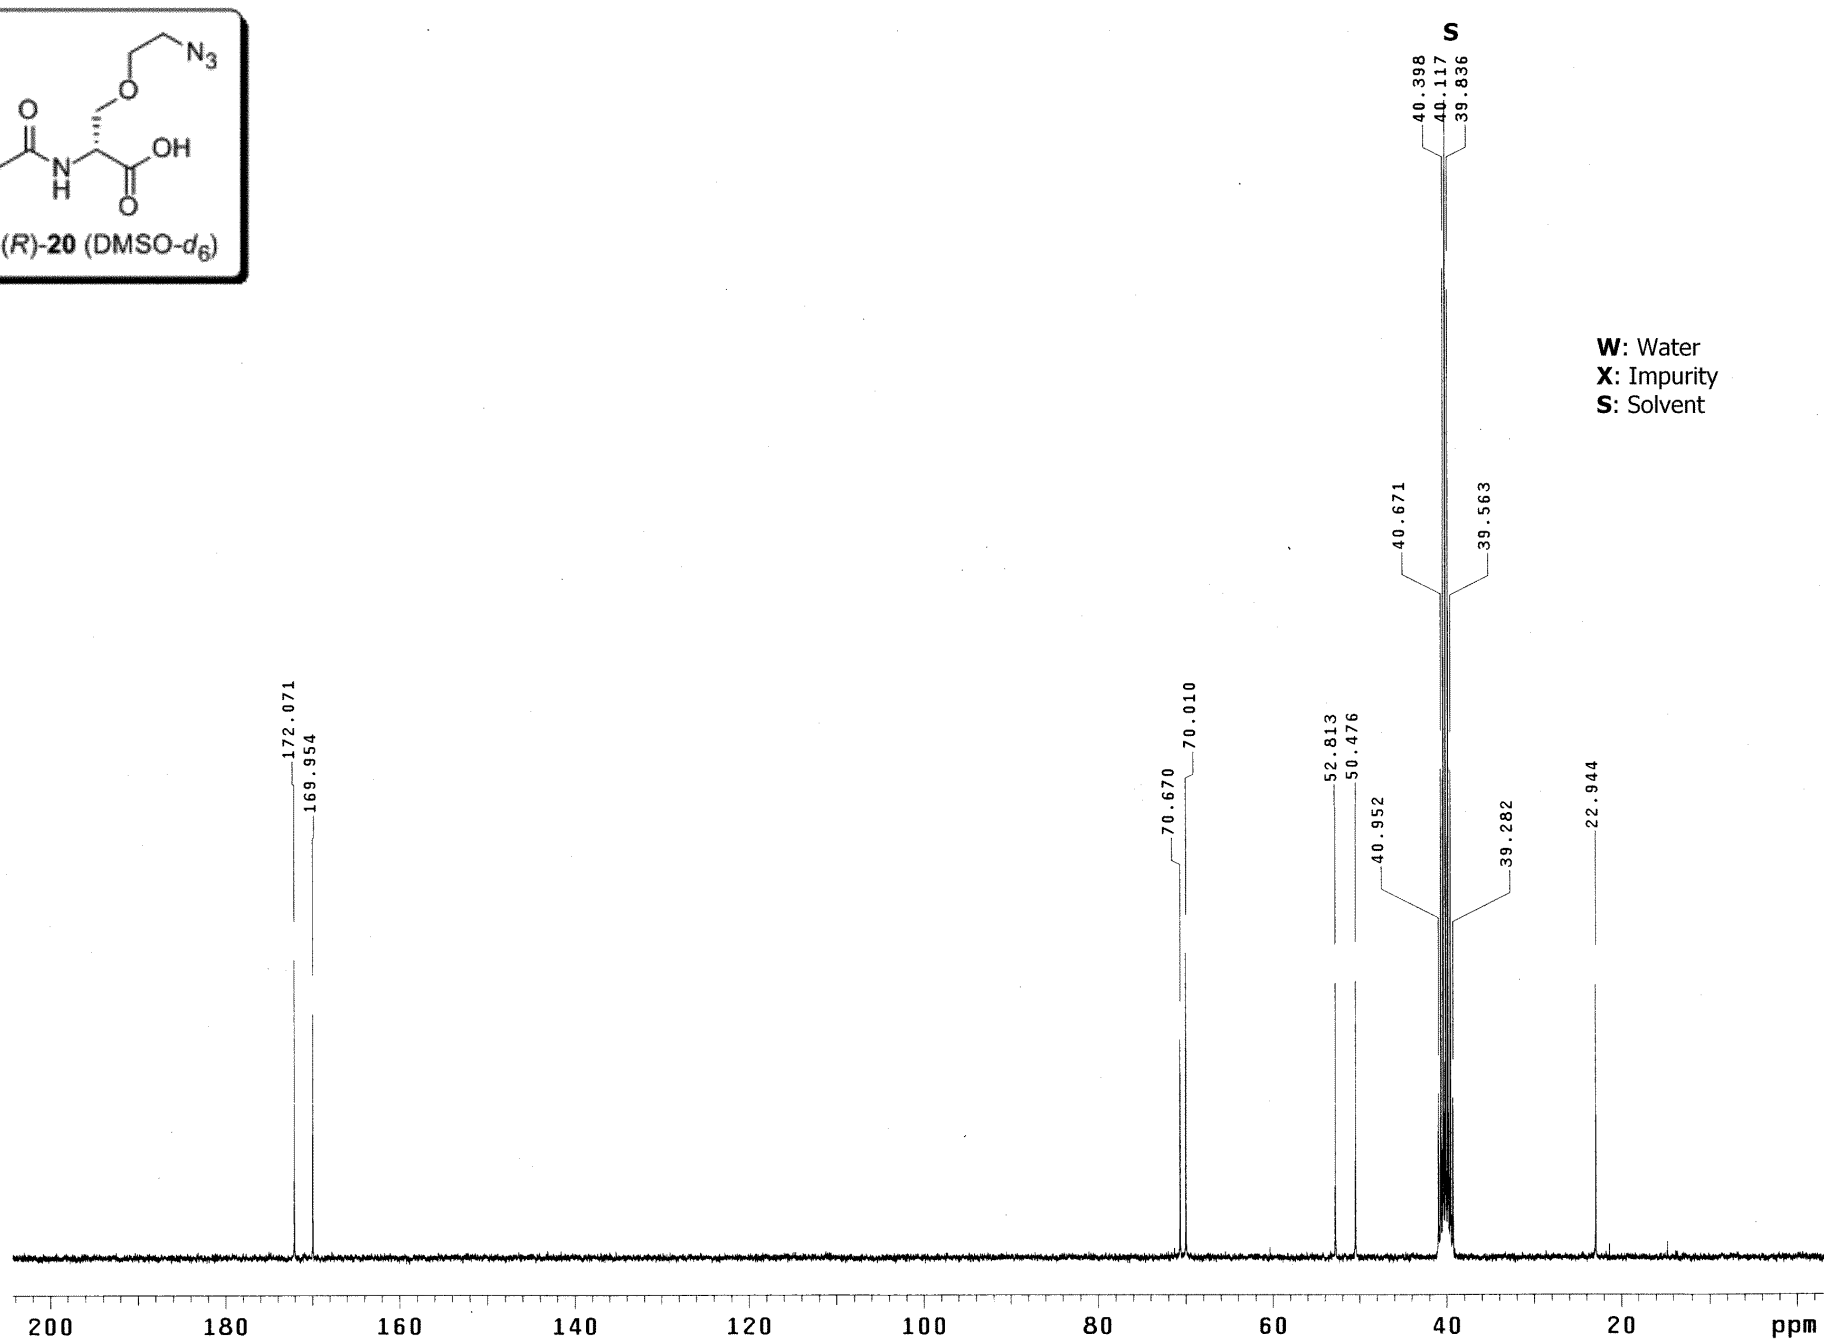

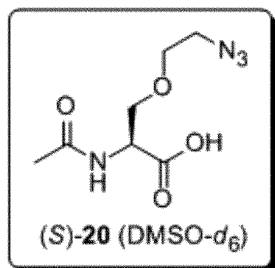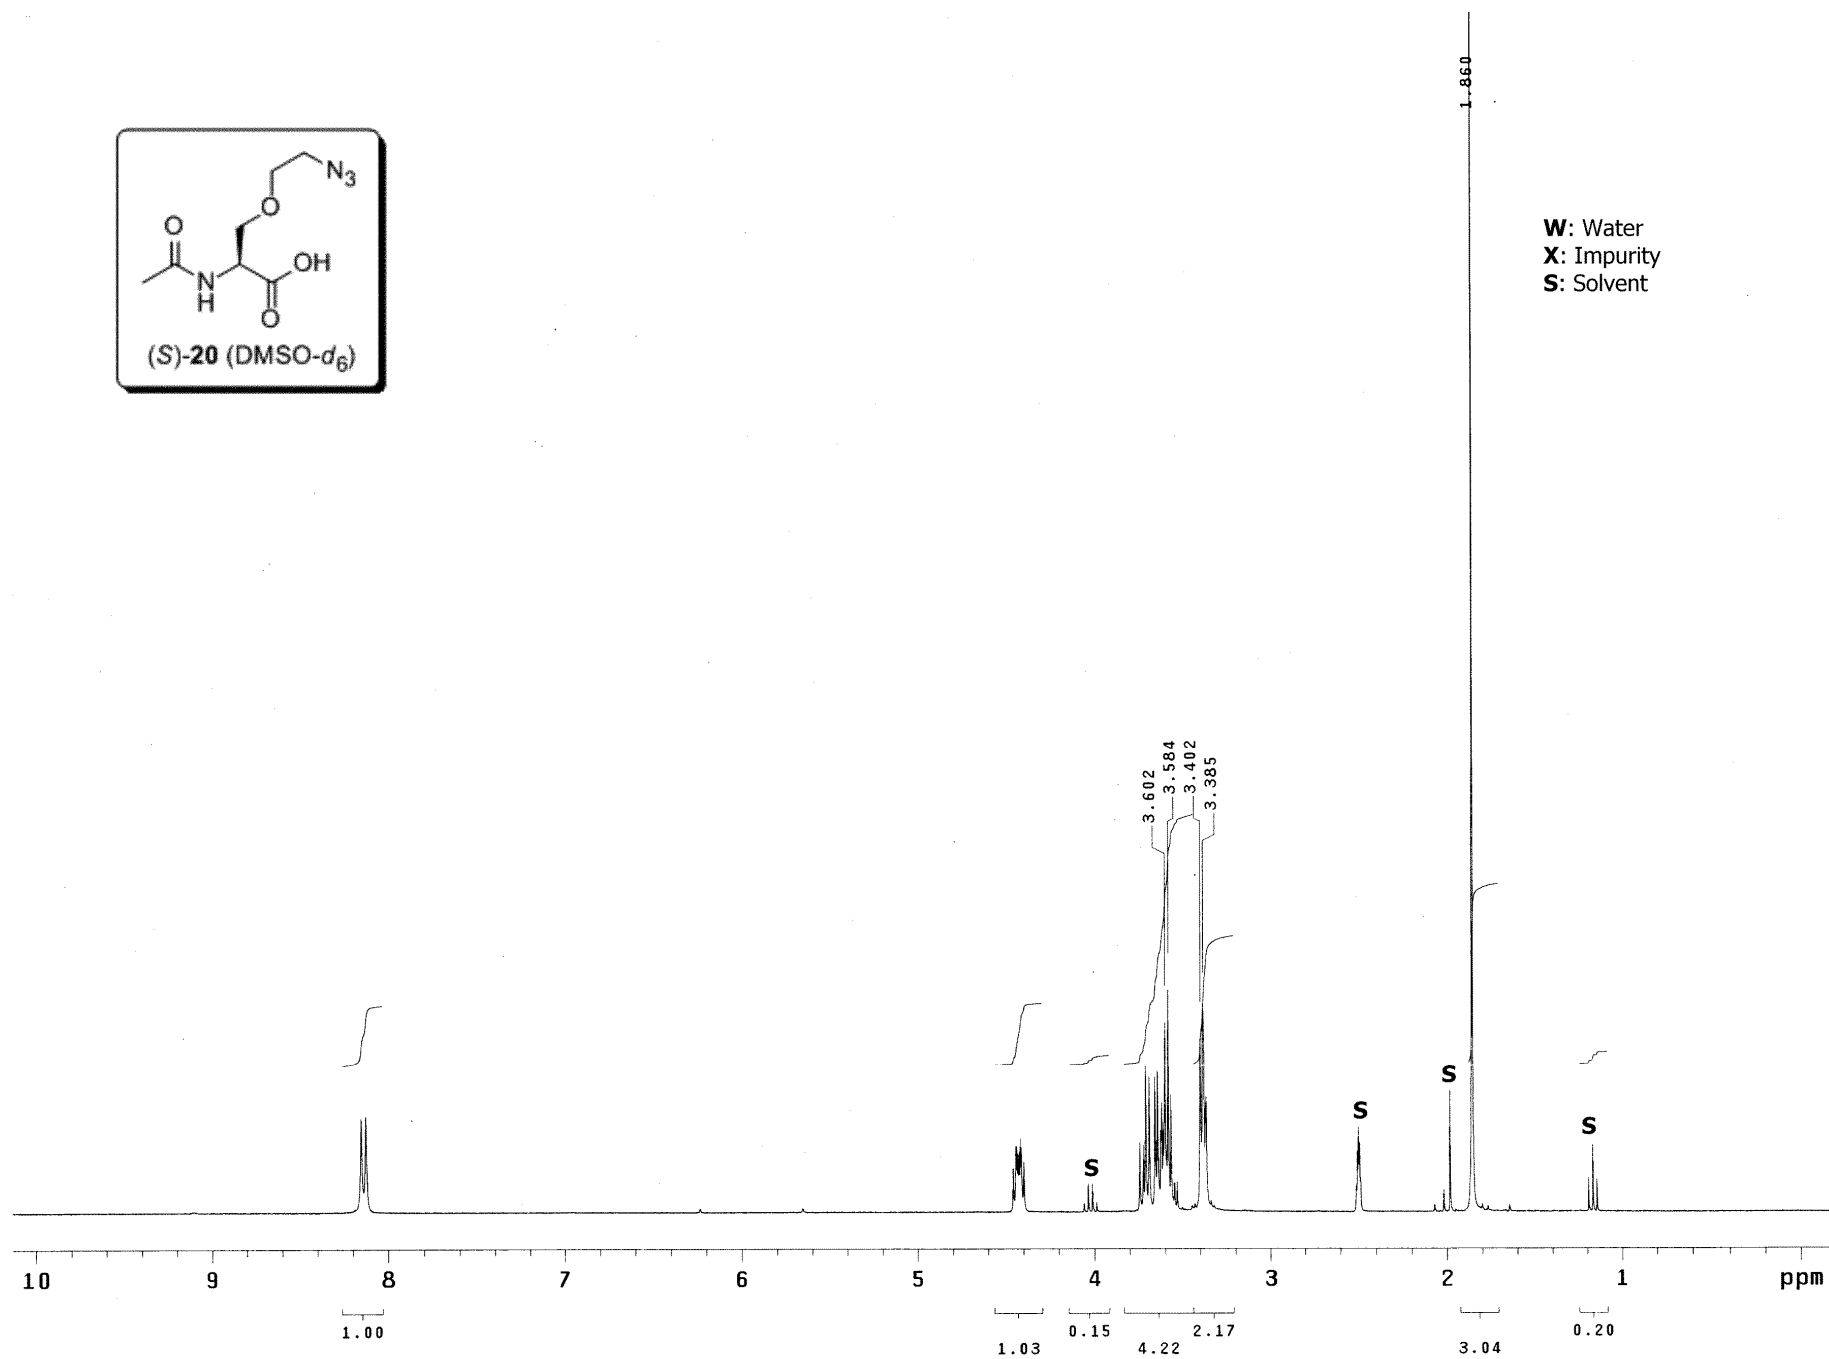

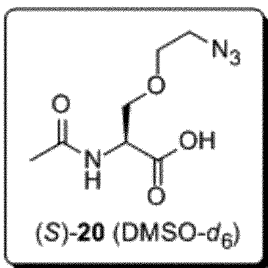

W: Water  
 X: Impurity  
 S: Solvent

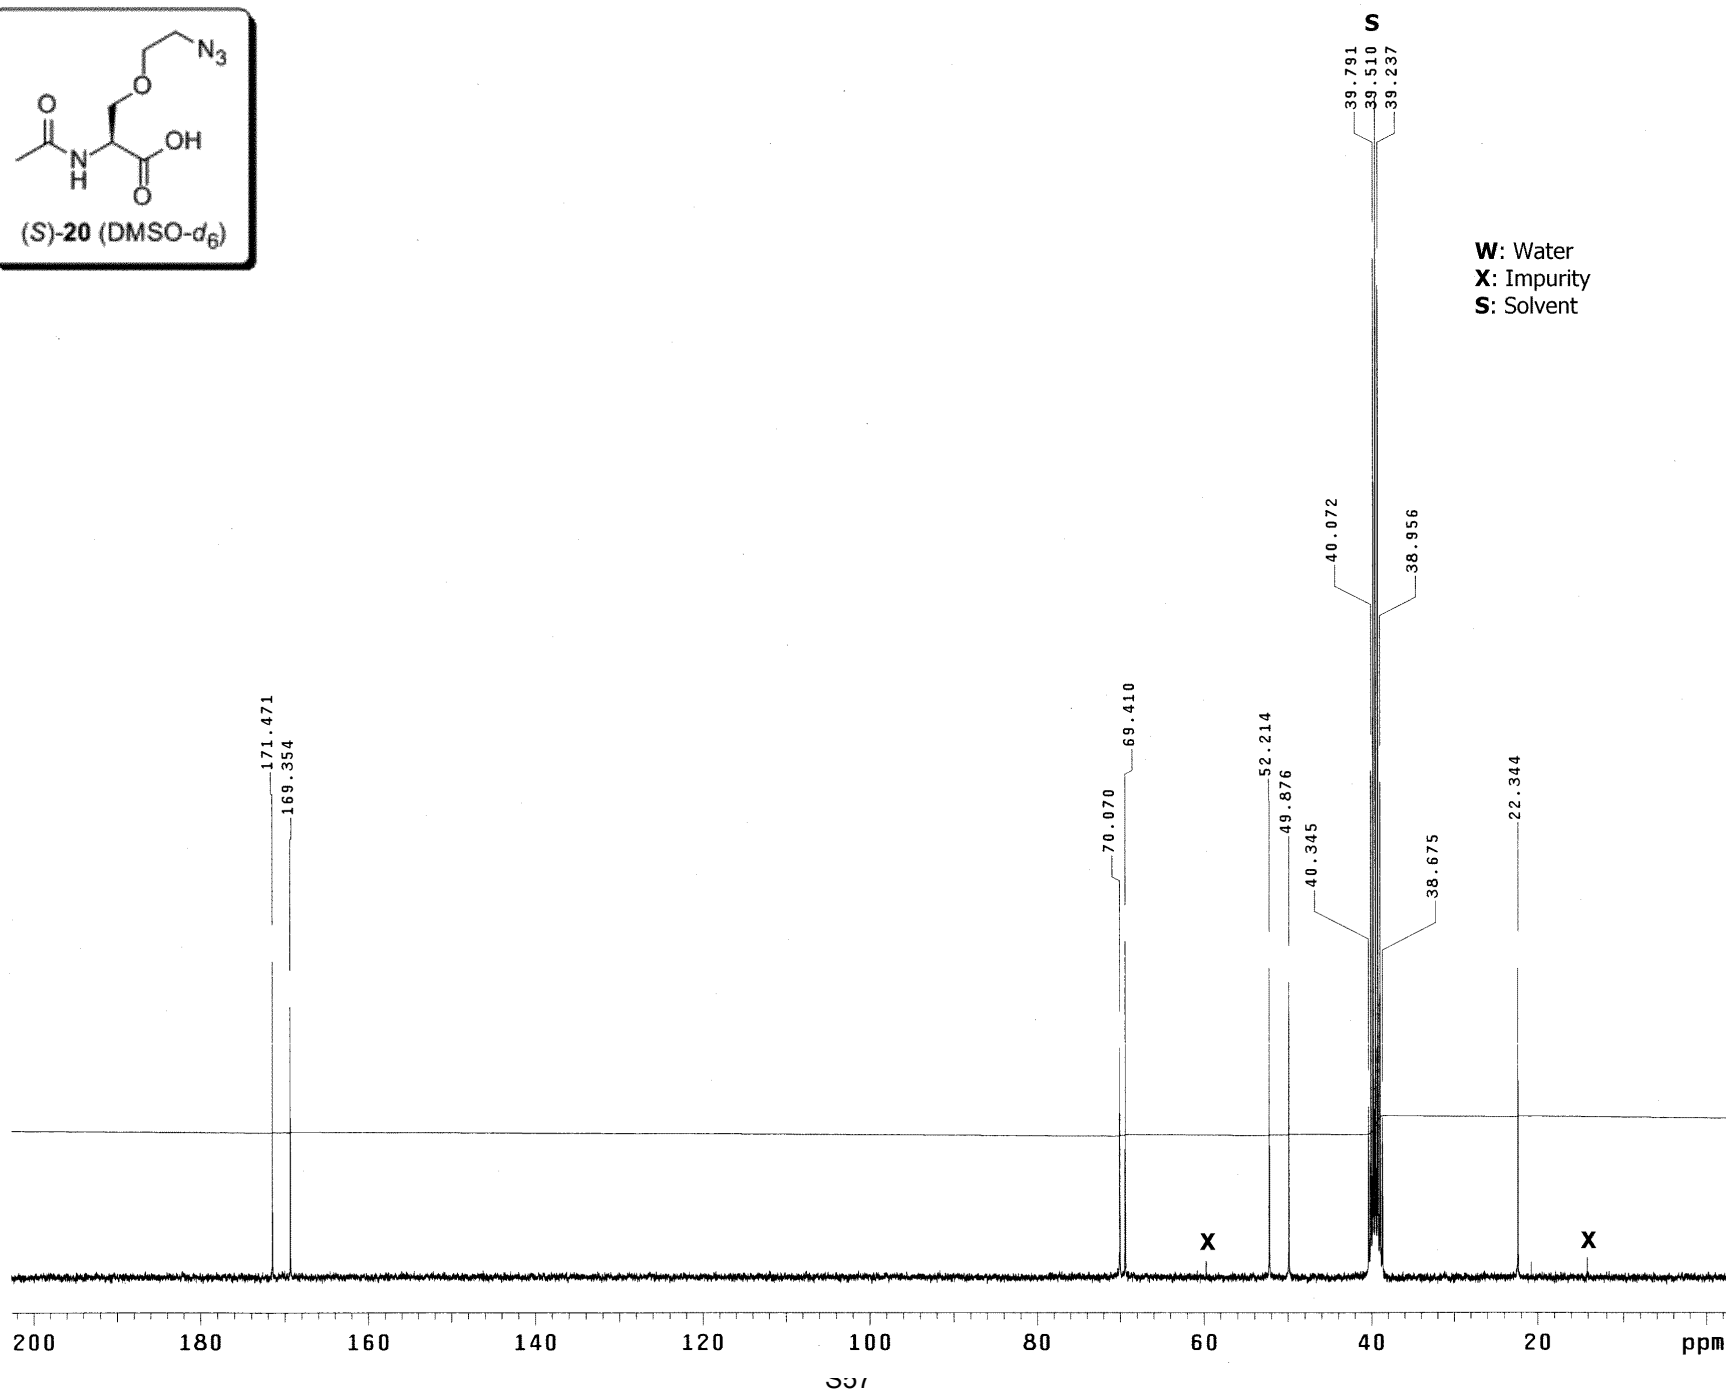

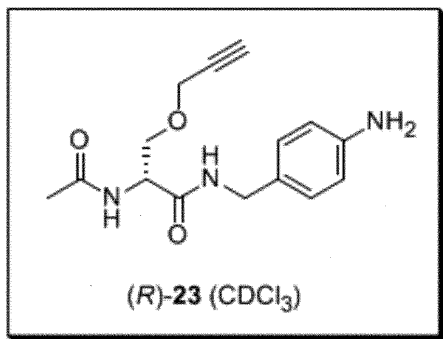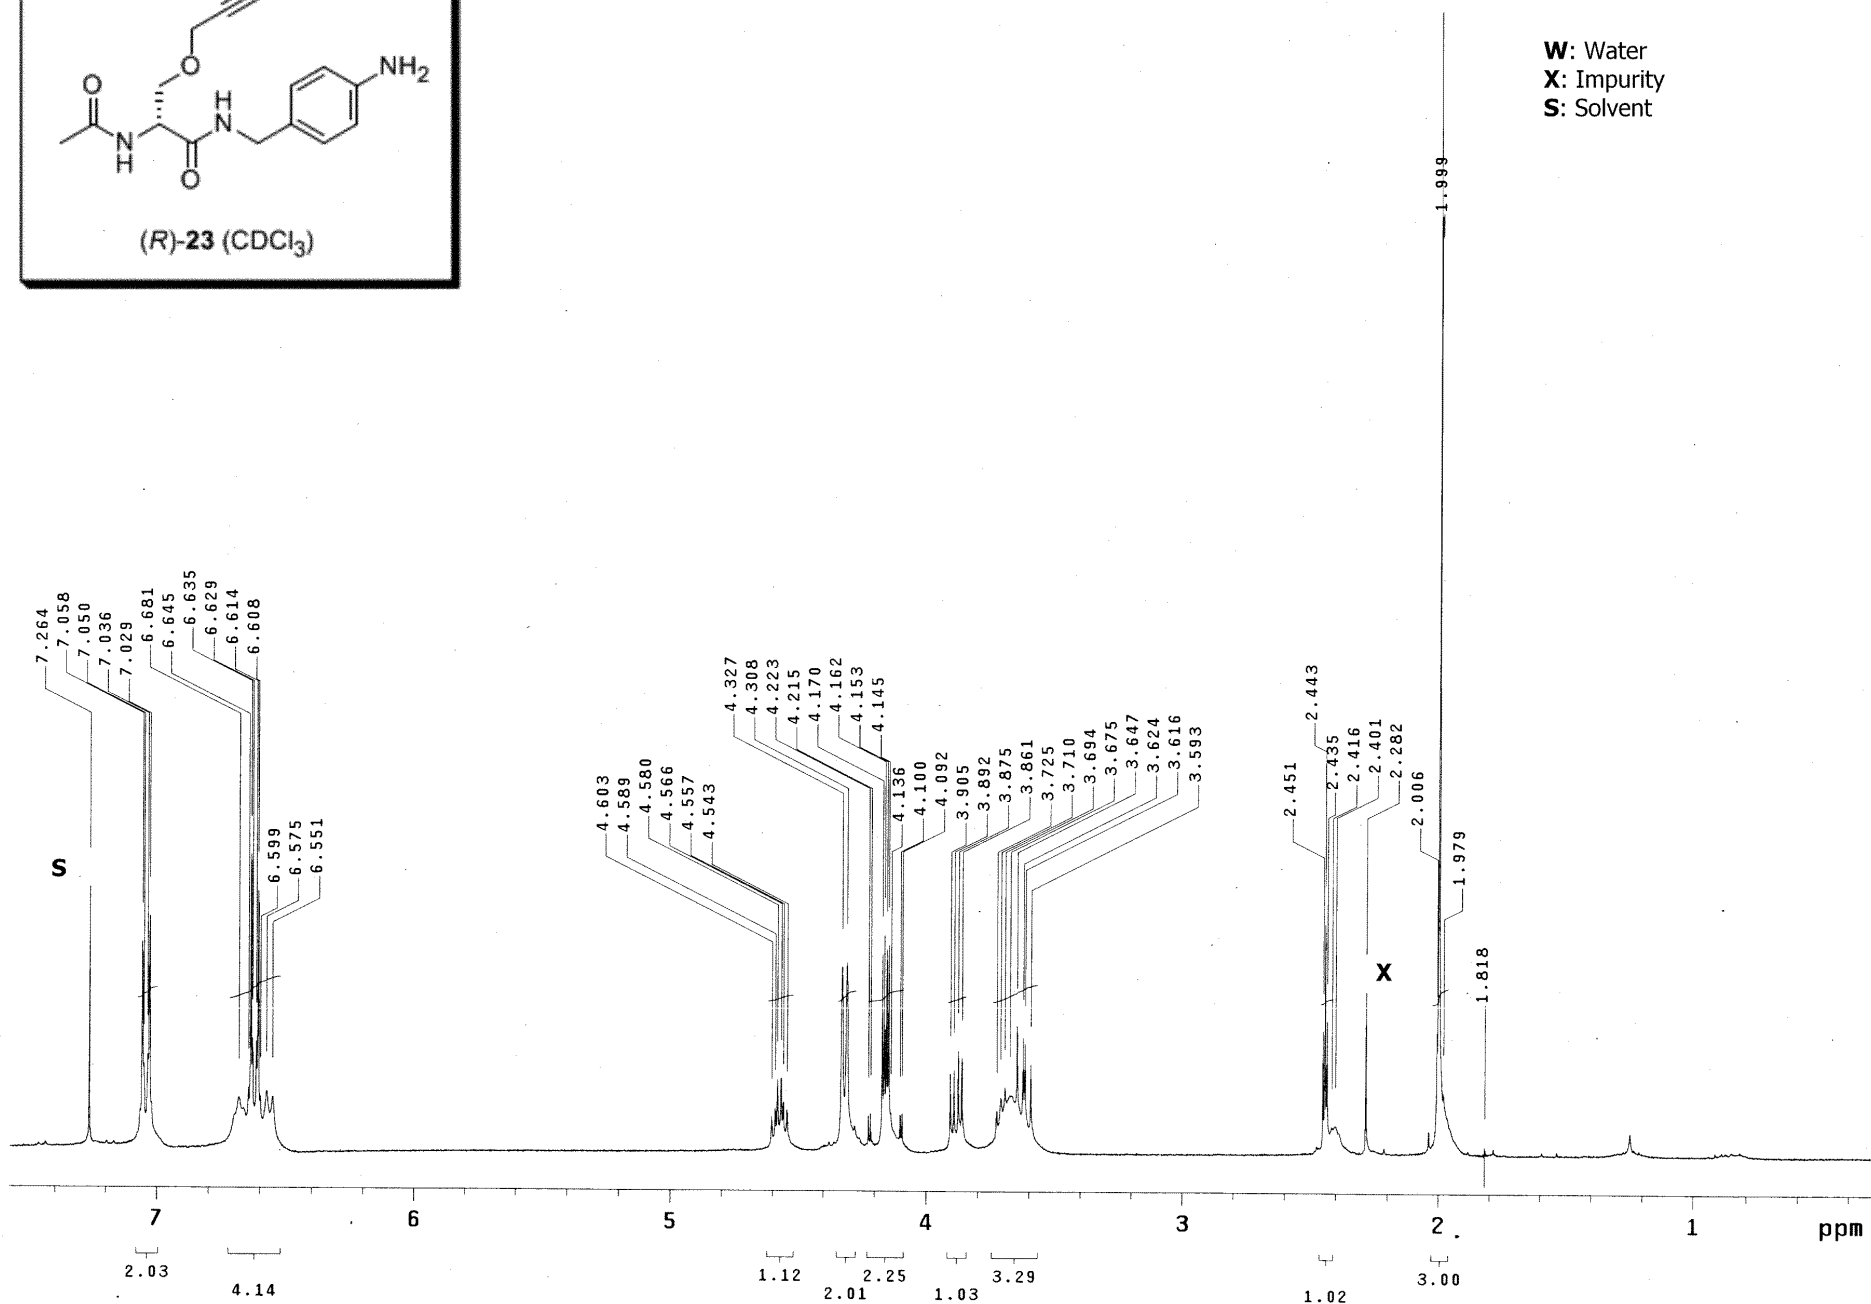

S58

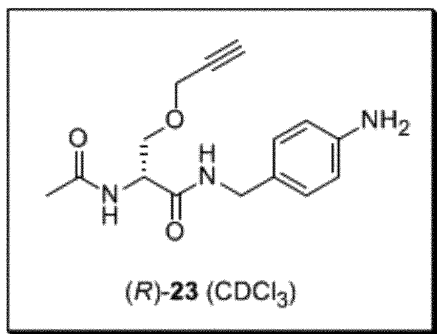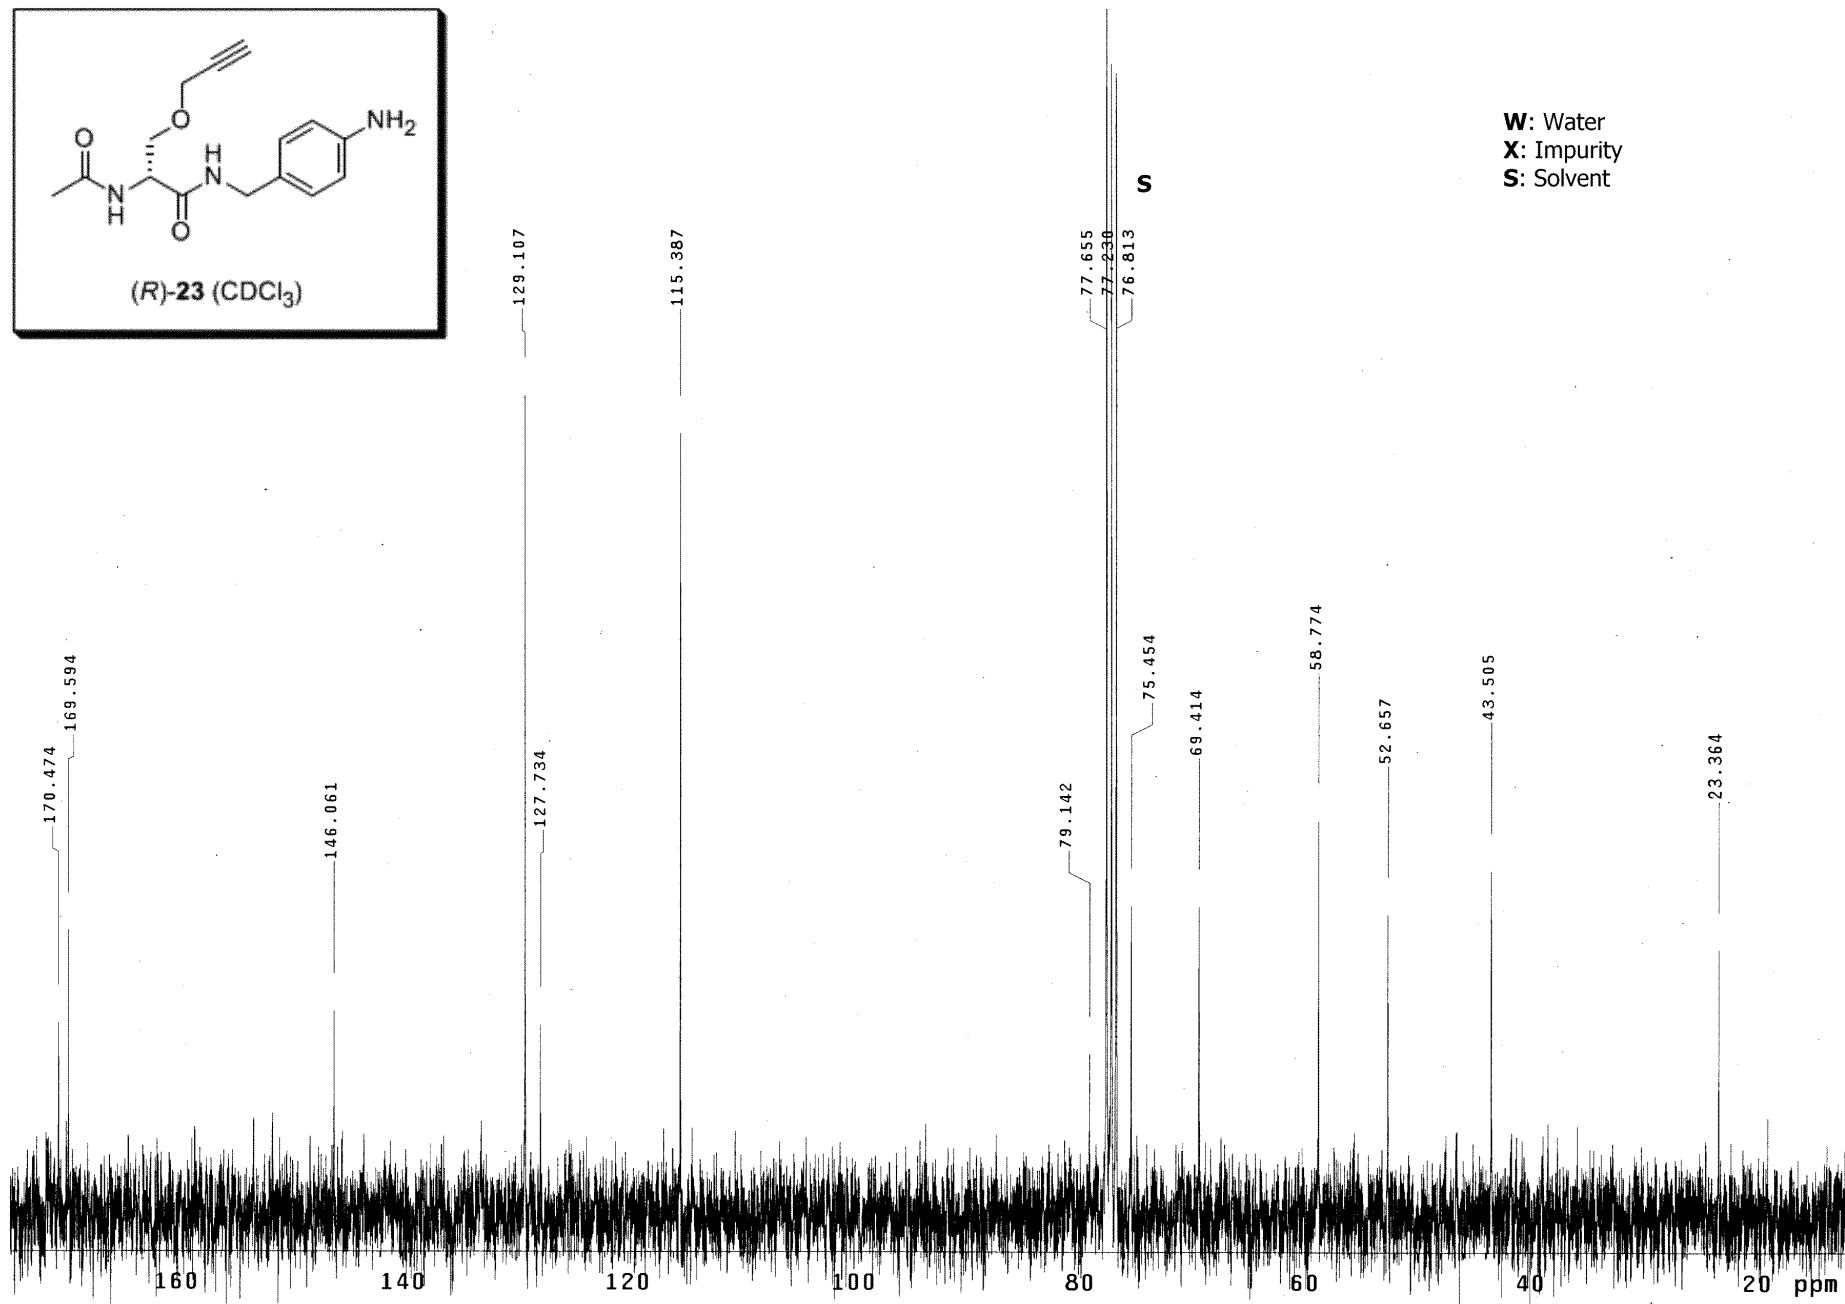

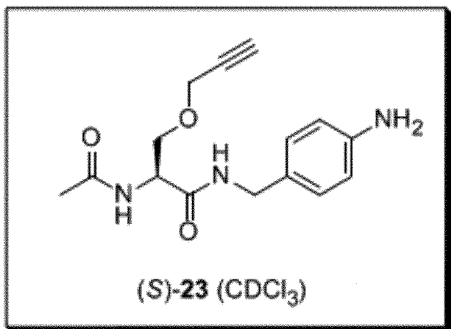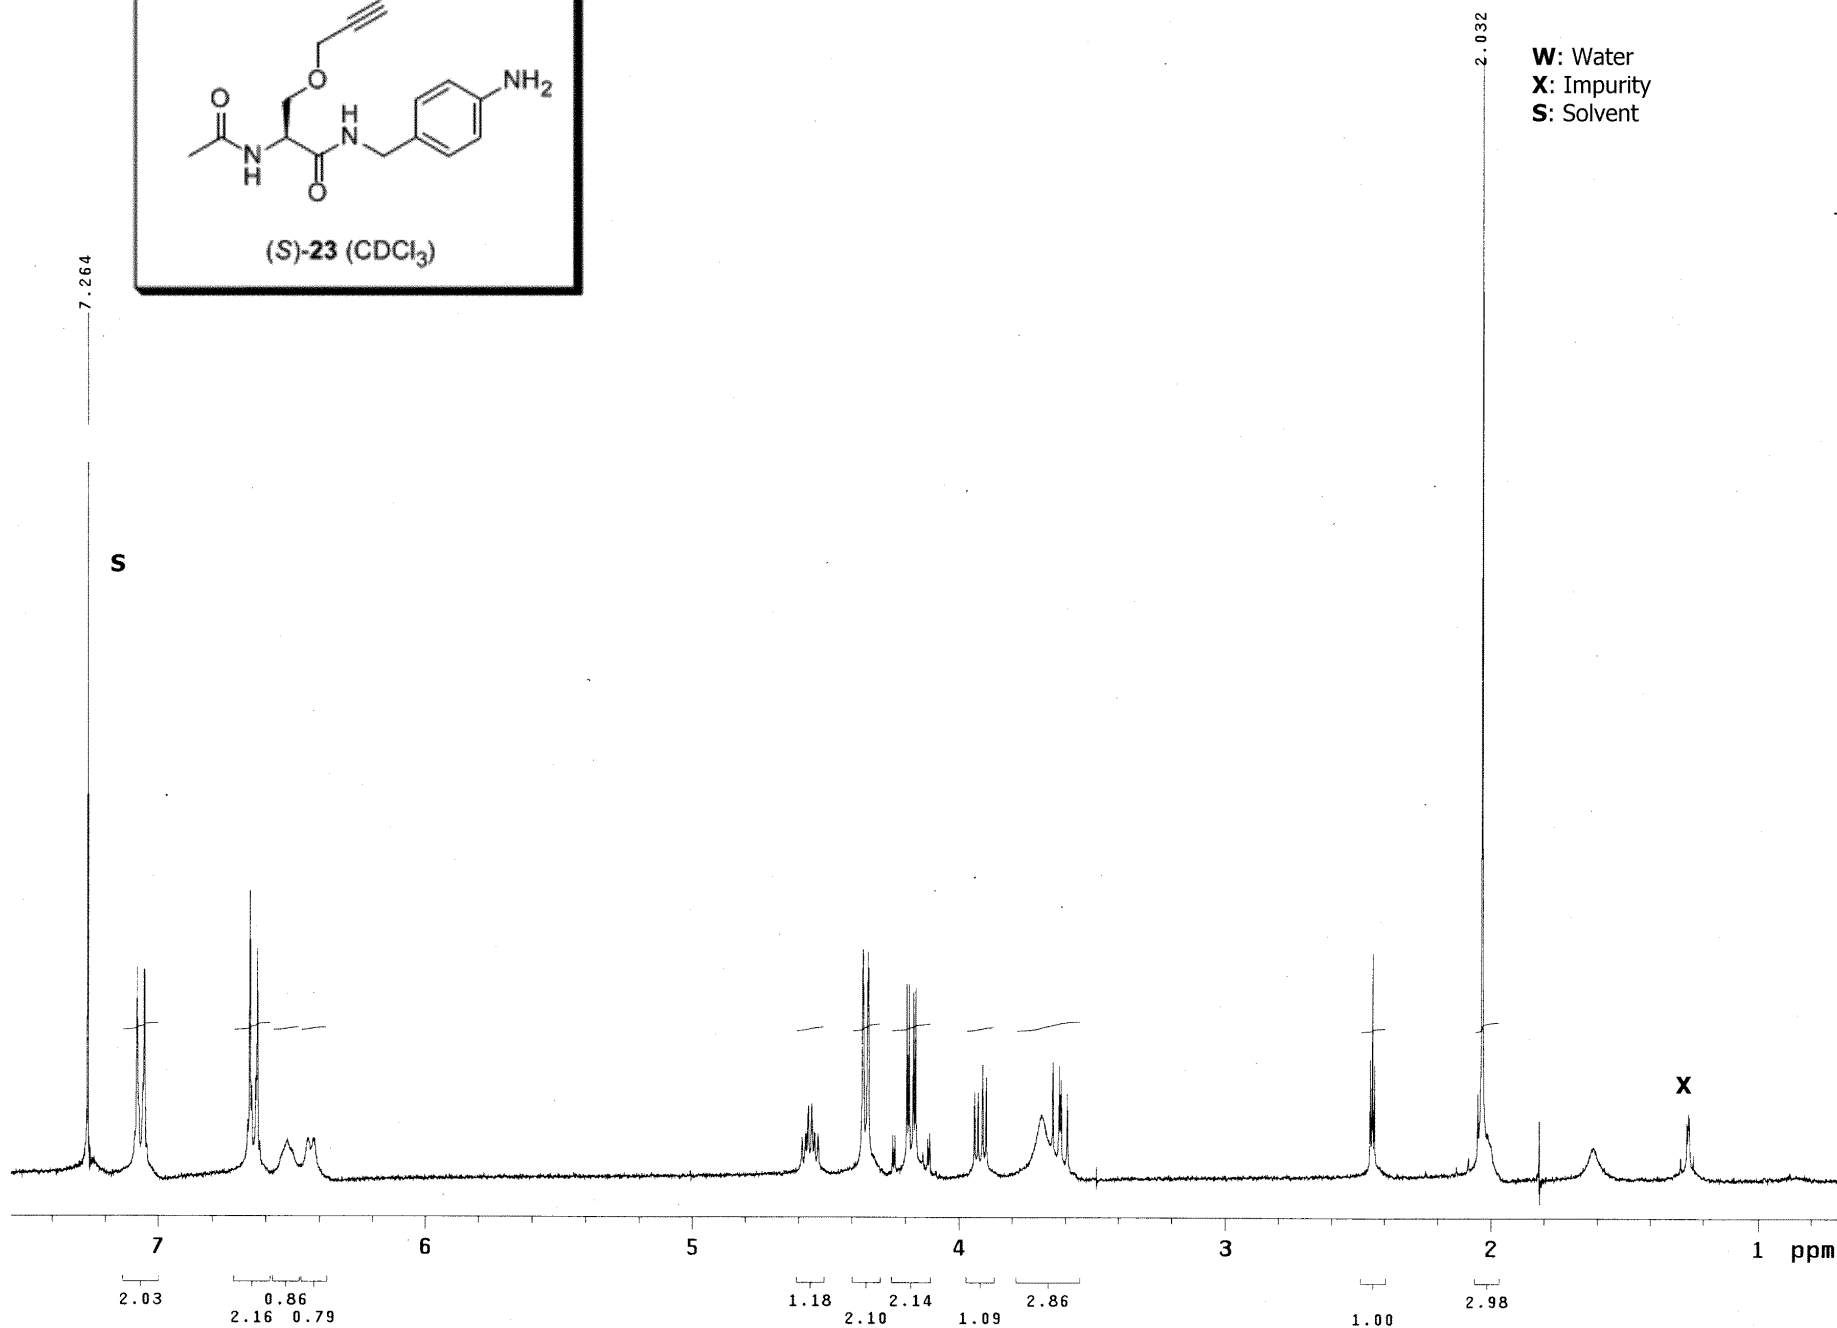

W: Water  
X: Impurity  
S: Solvent



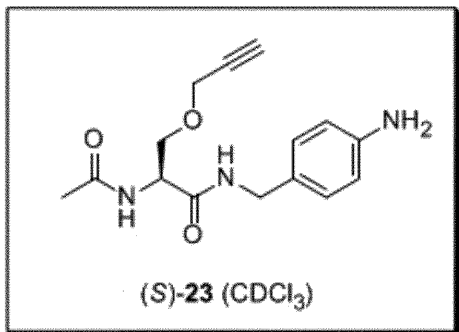

W: Water  
X: Impurity  
S: Solvent

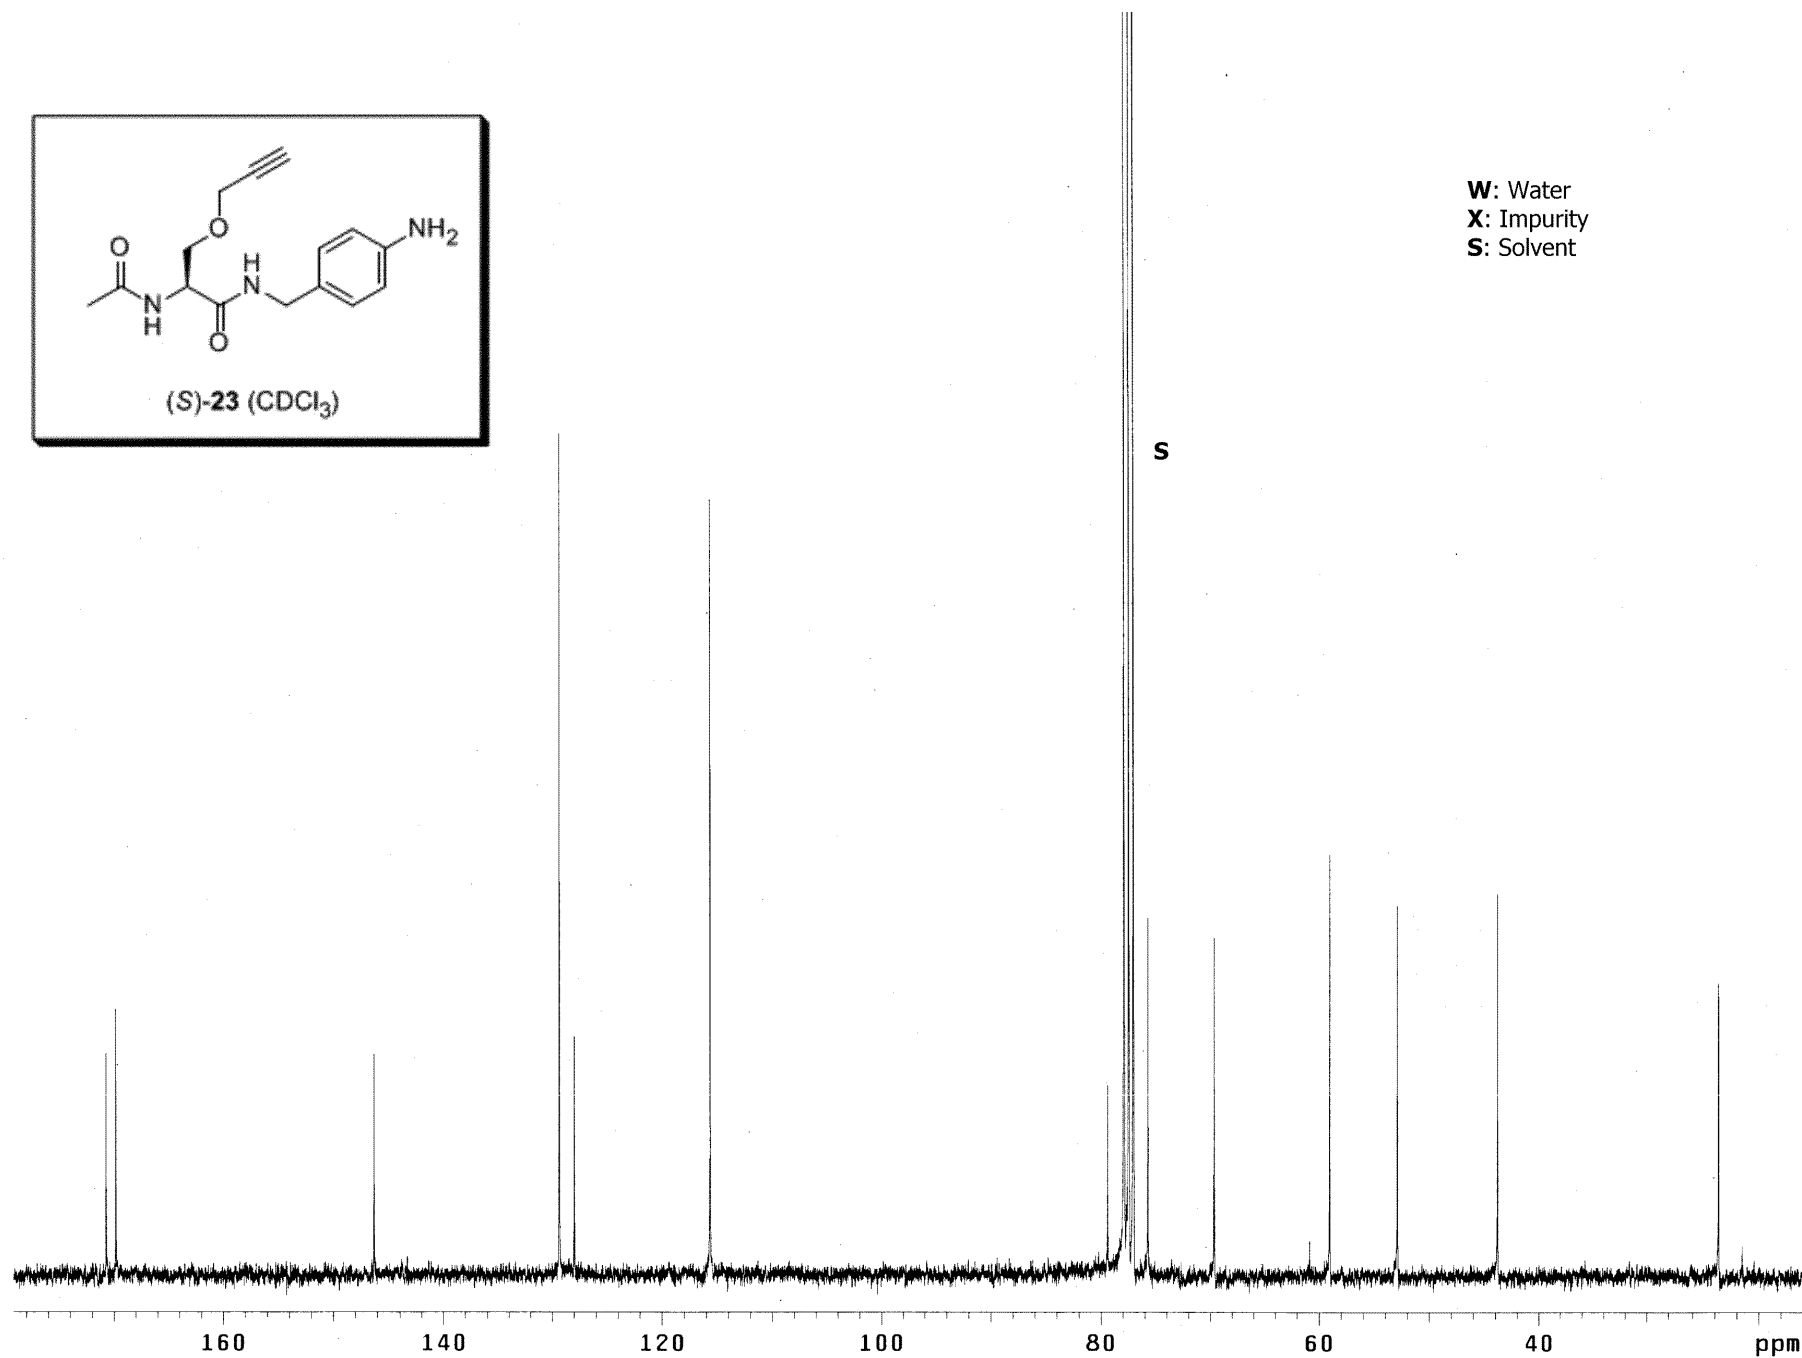

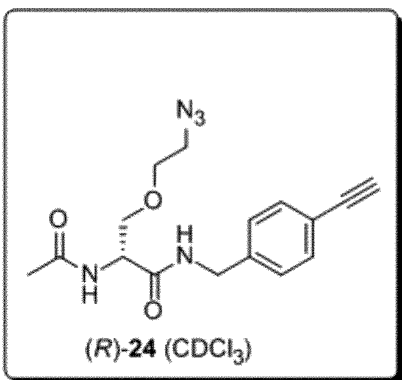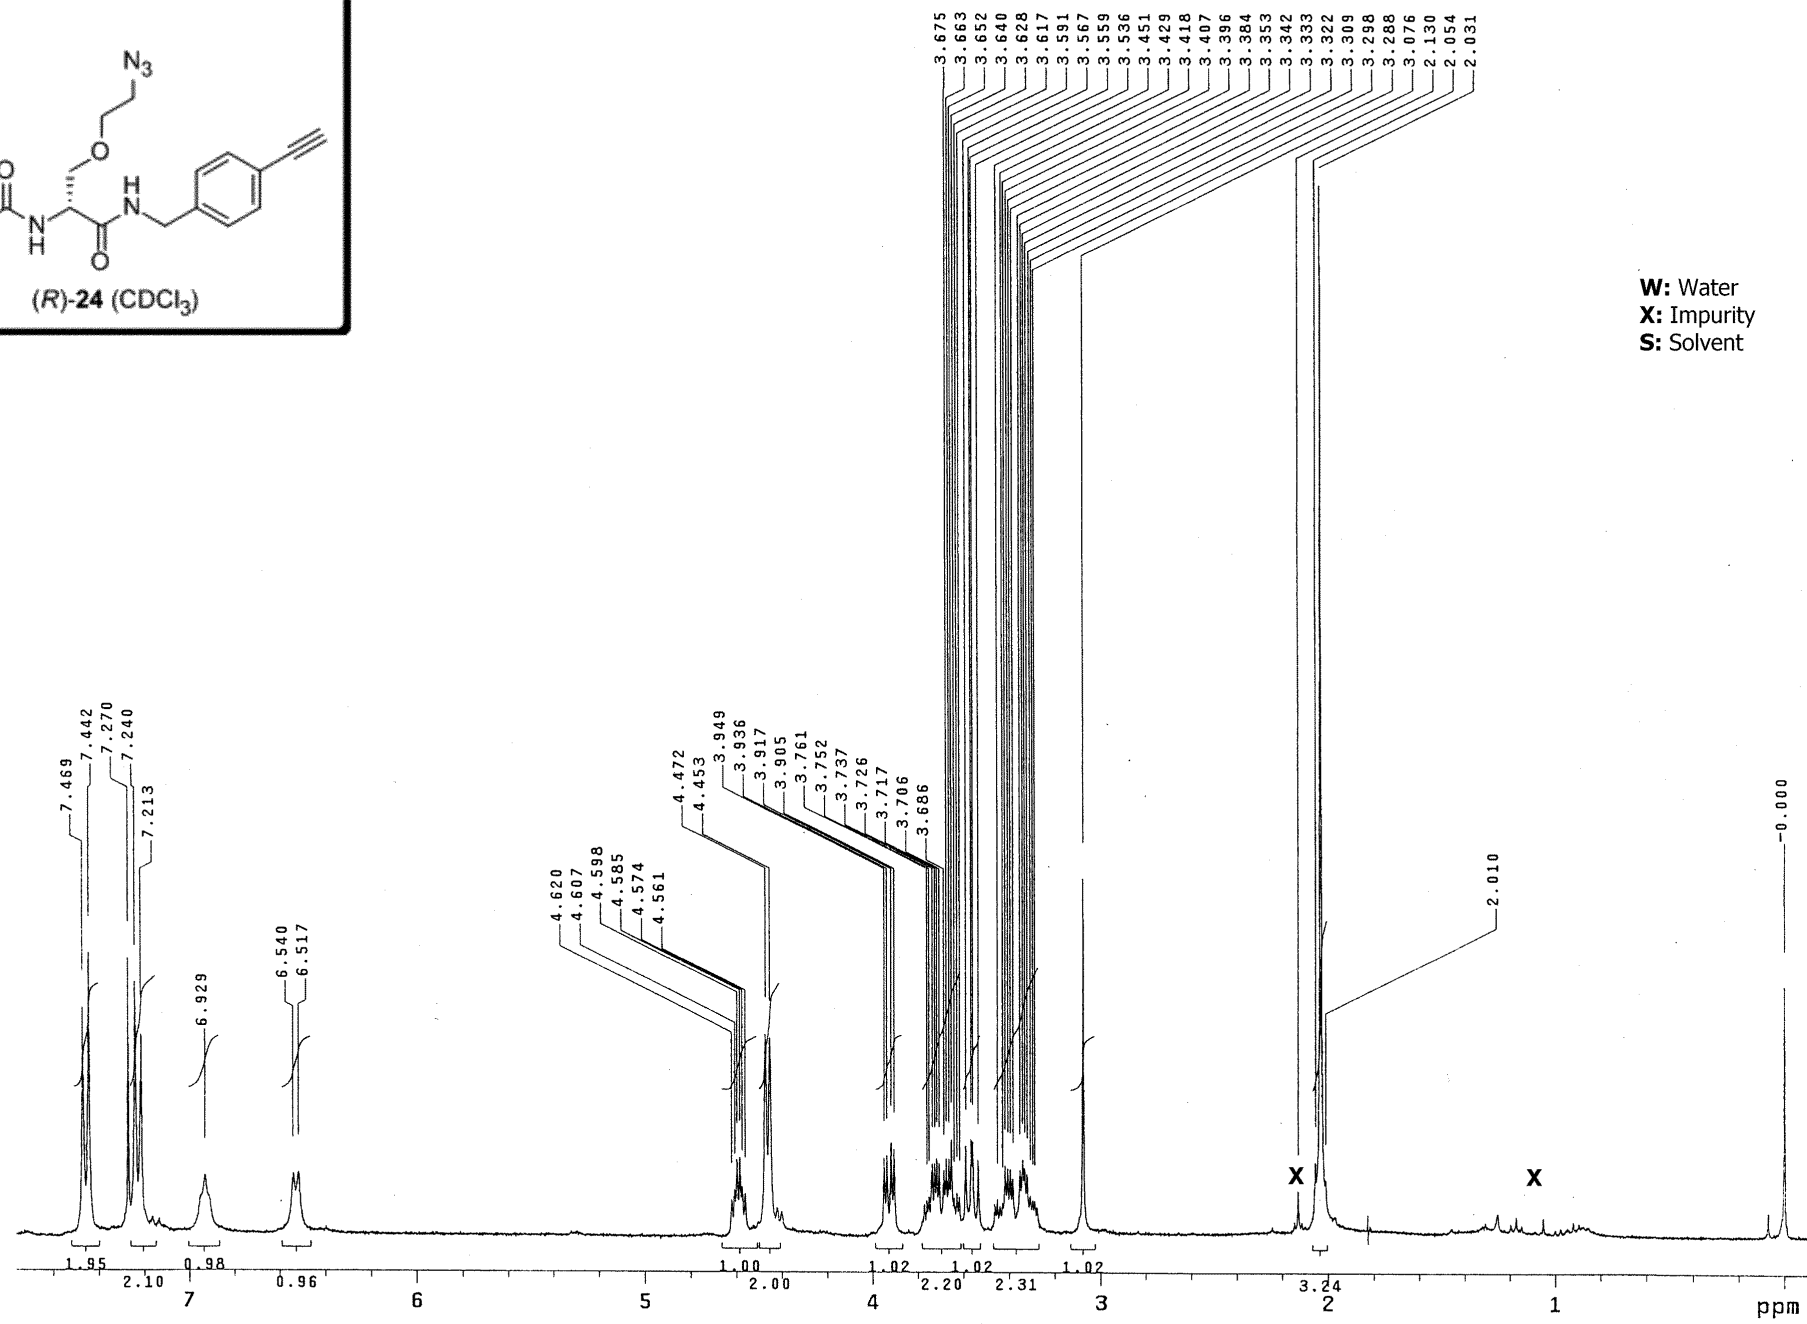

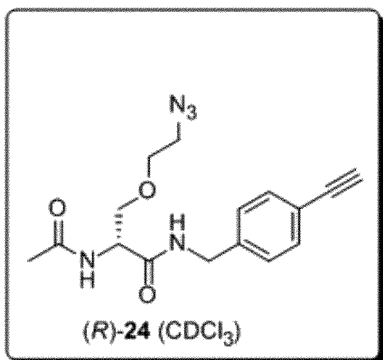

W: Water  
X: Impurity  
S: Solvent

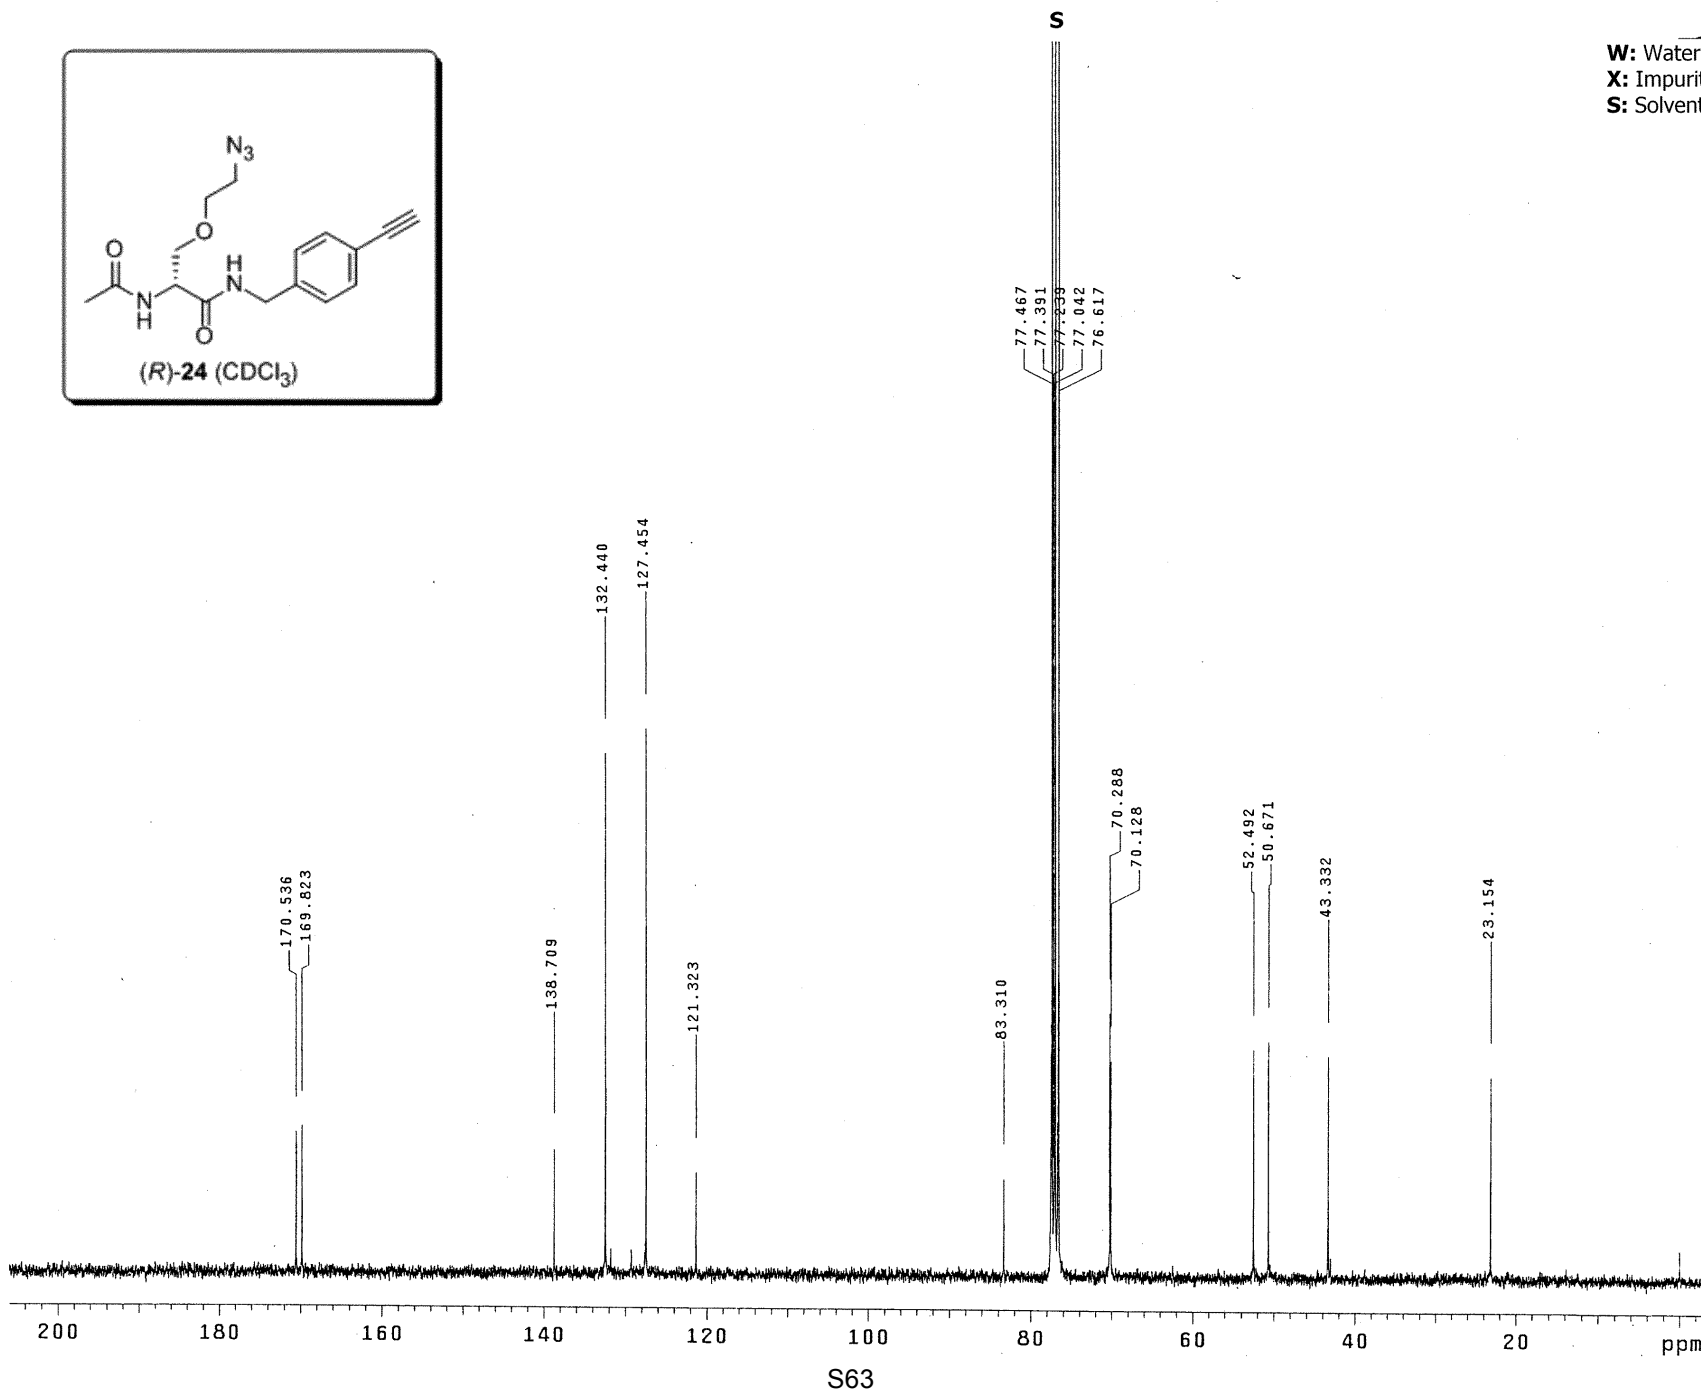

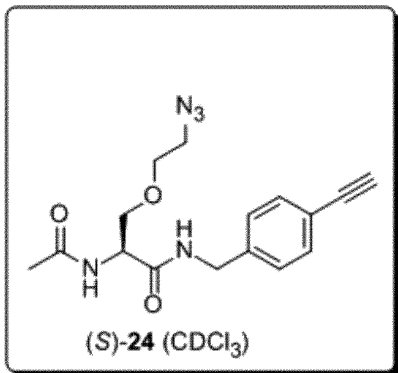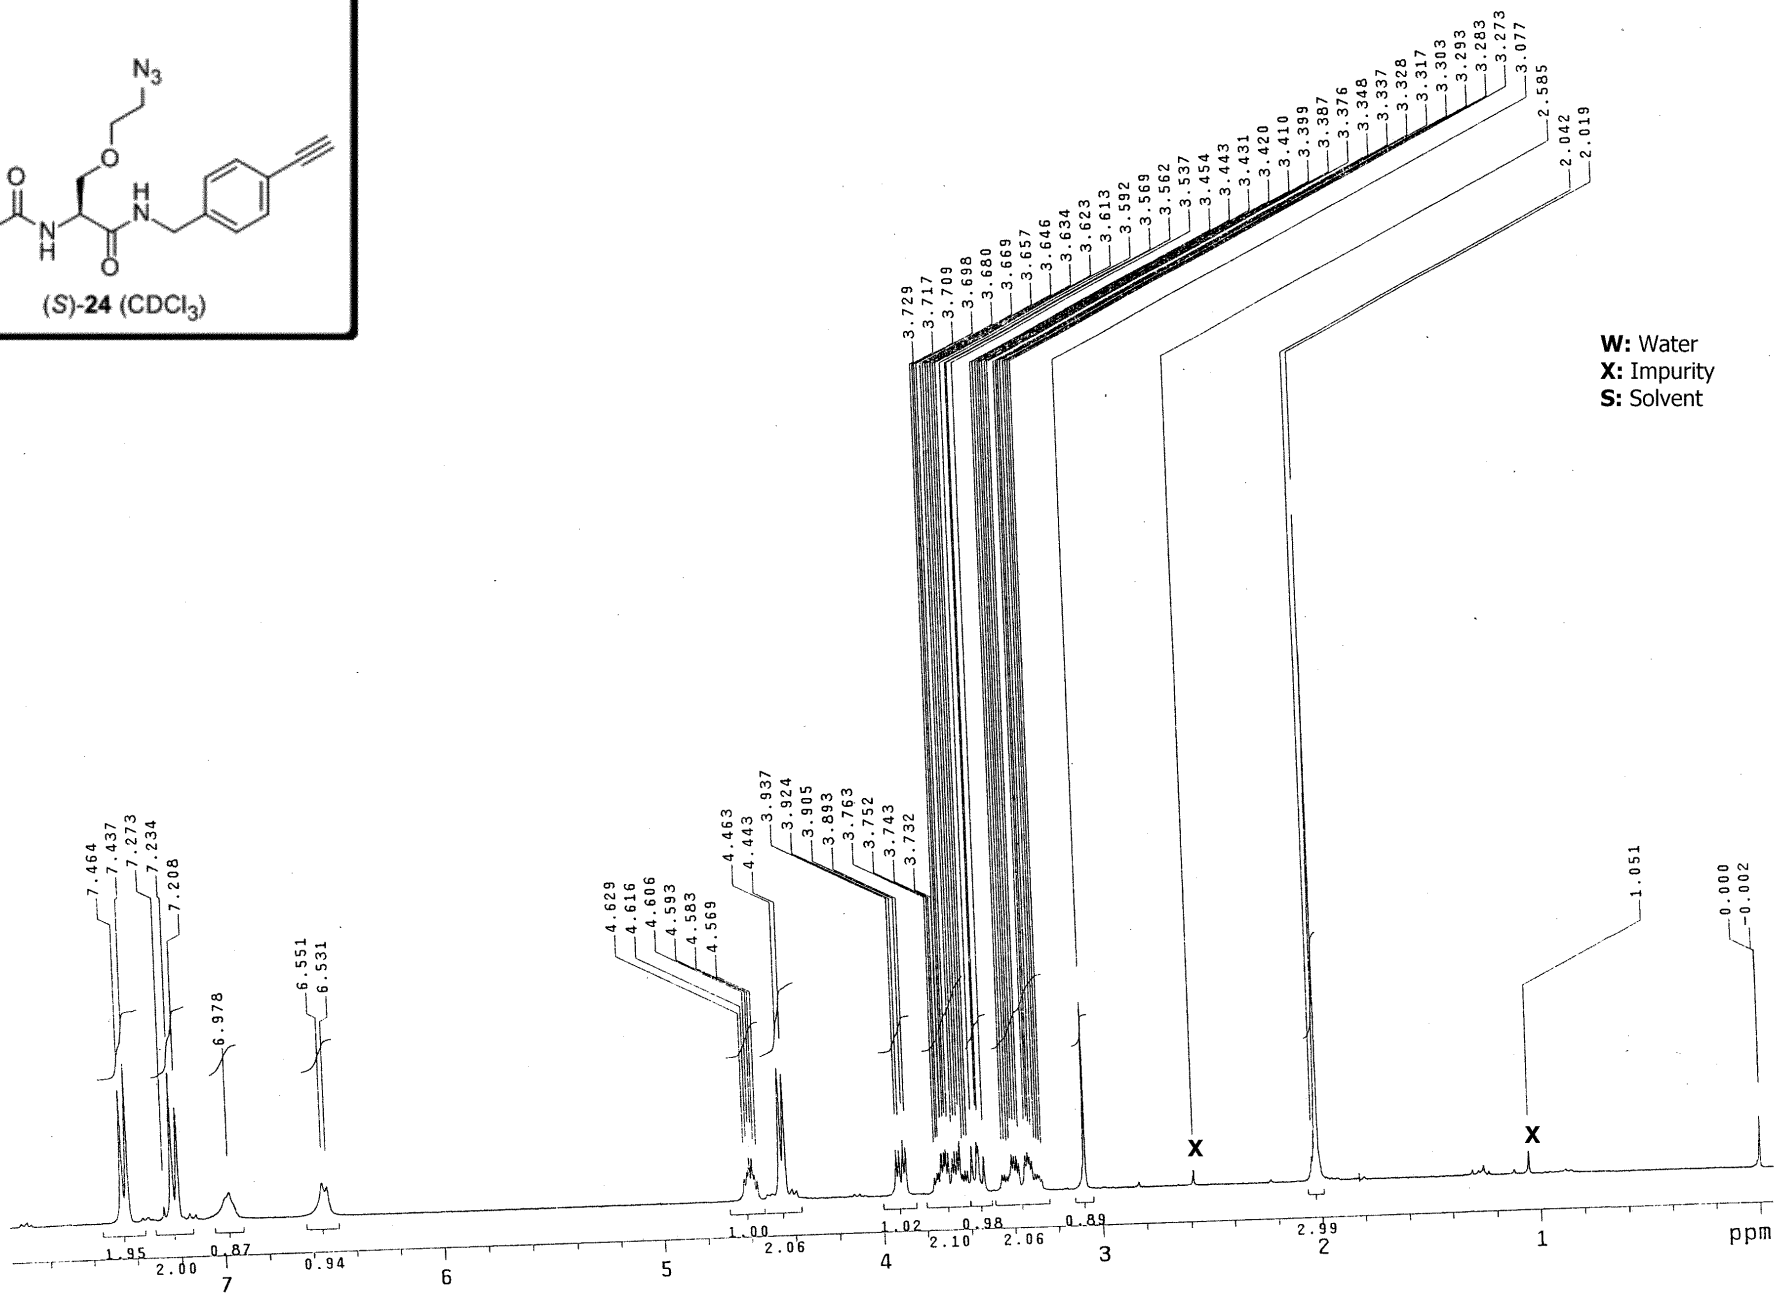

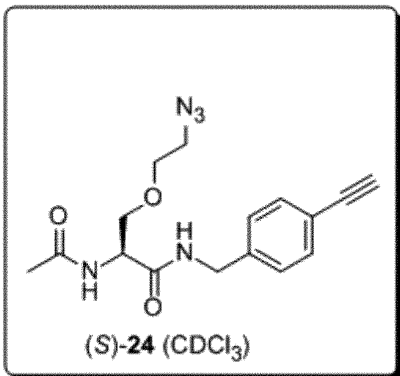

W: Water  
 X: Impurity  
 S: Solvent

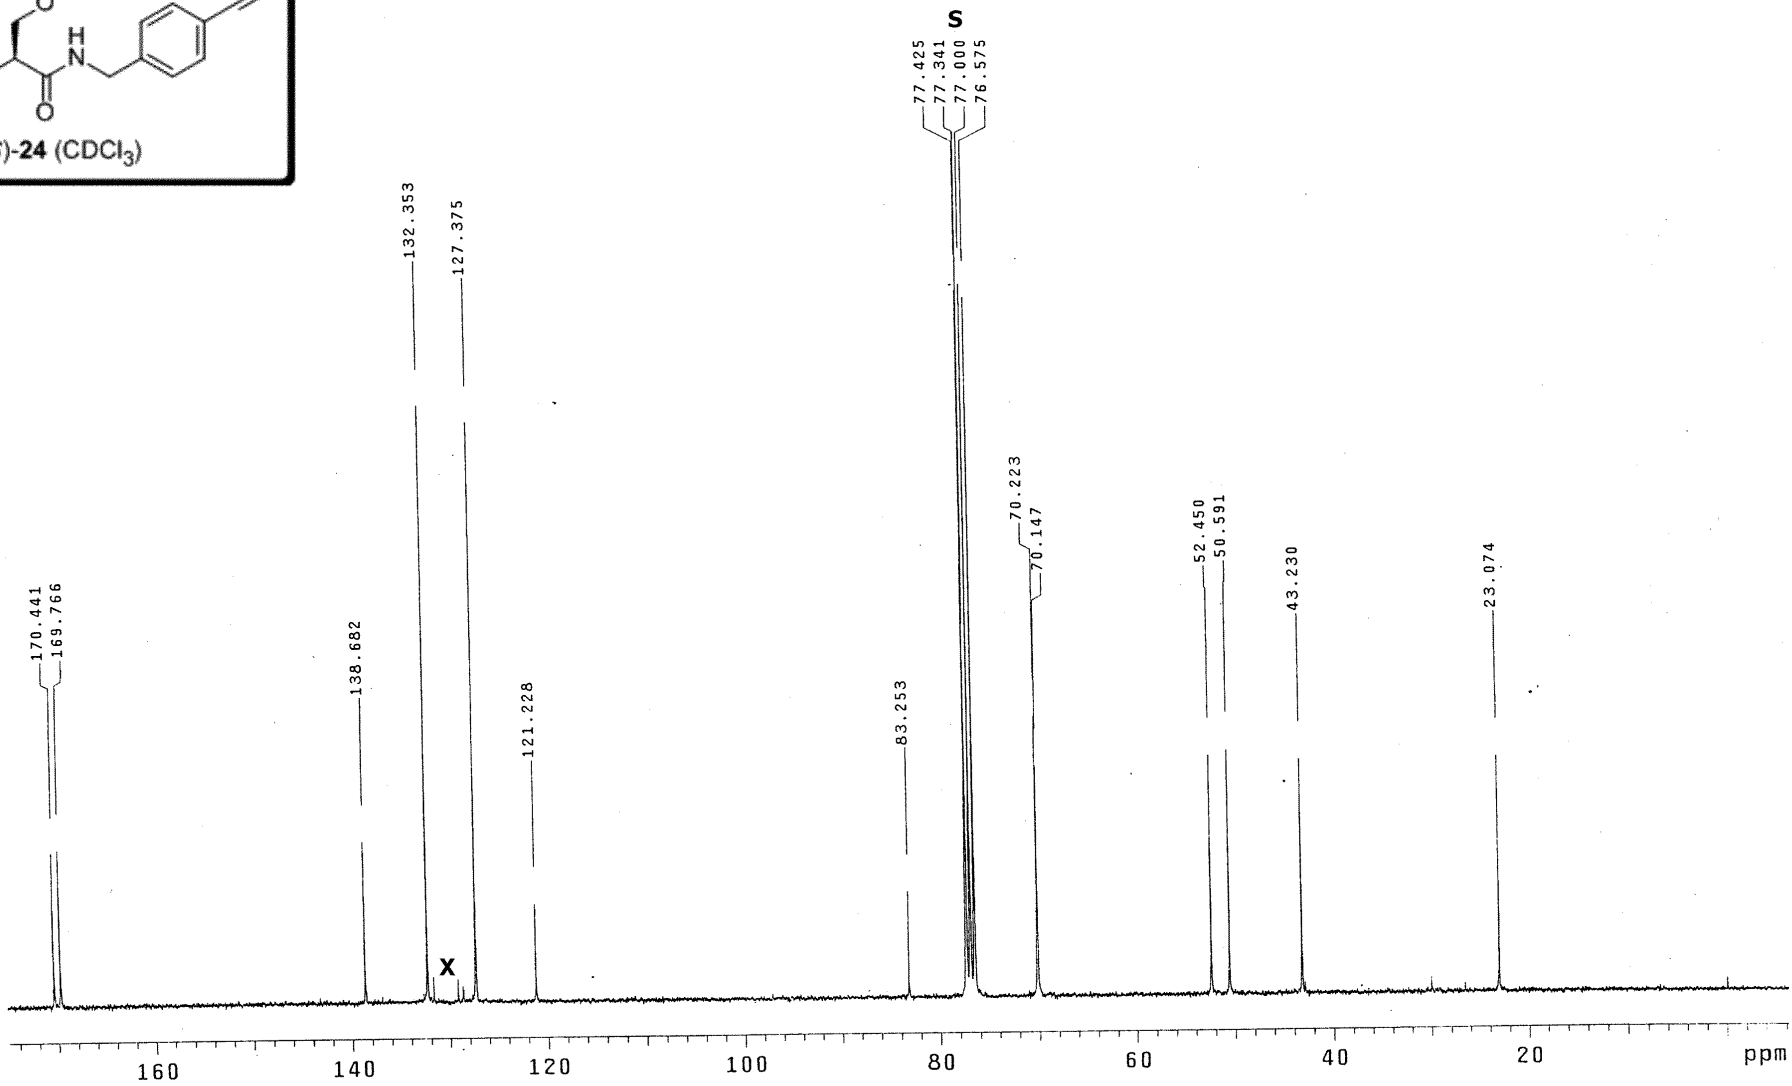

W: Water  
X: Impurity  
S: Solvent

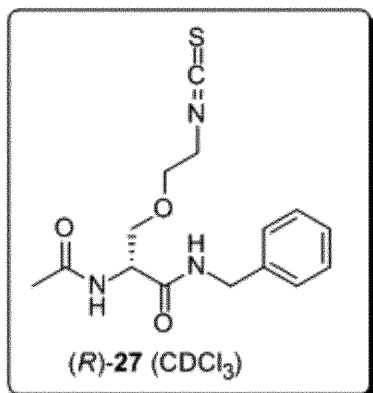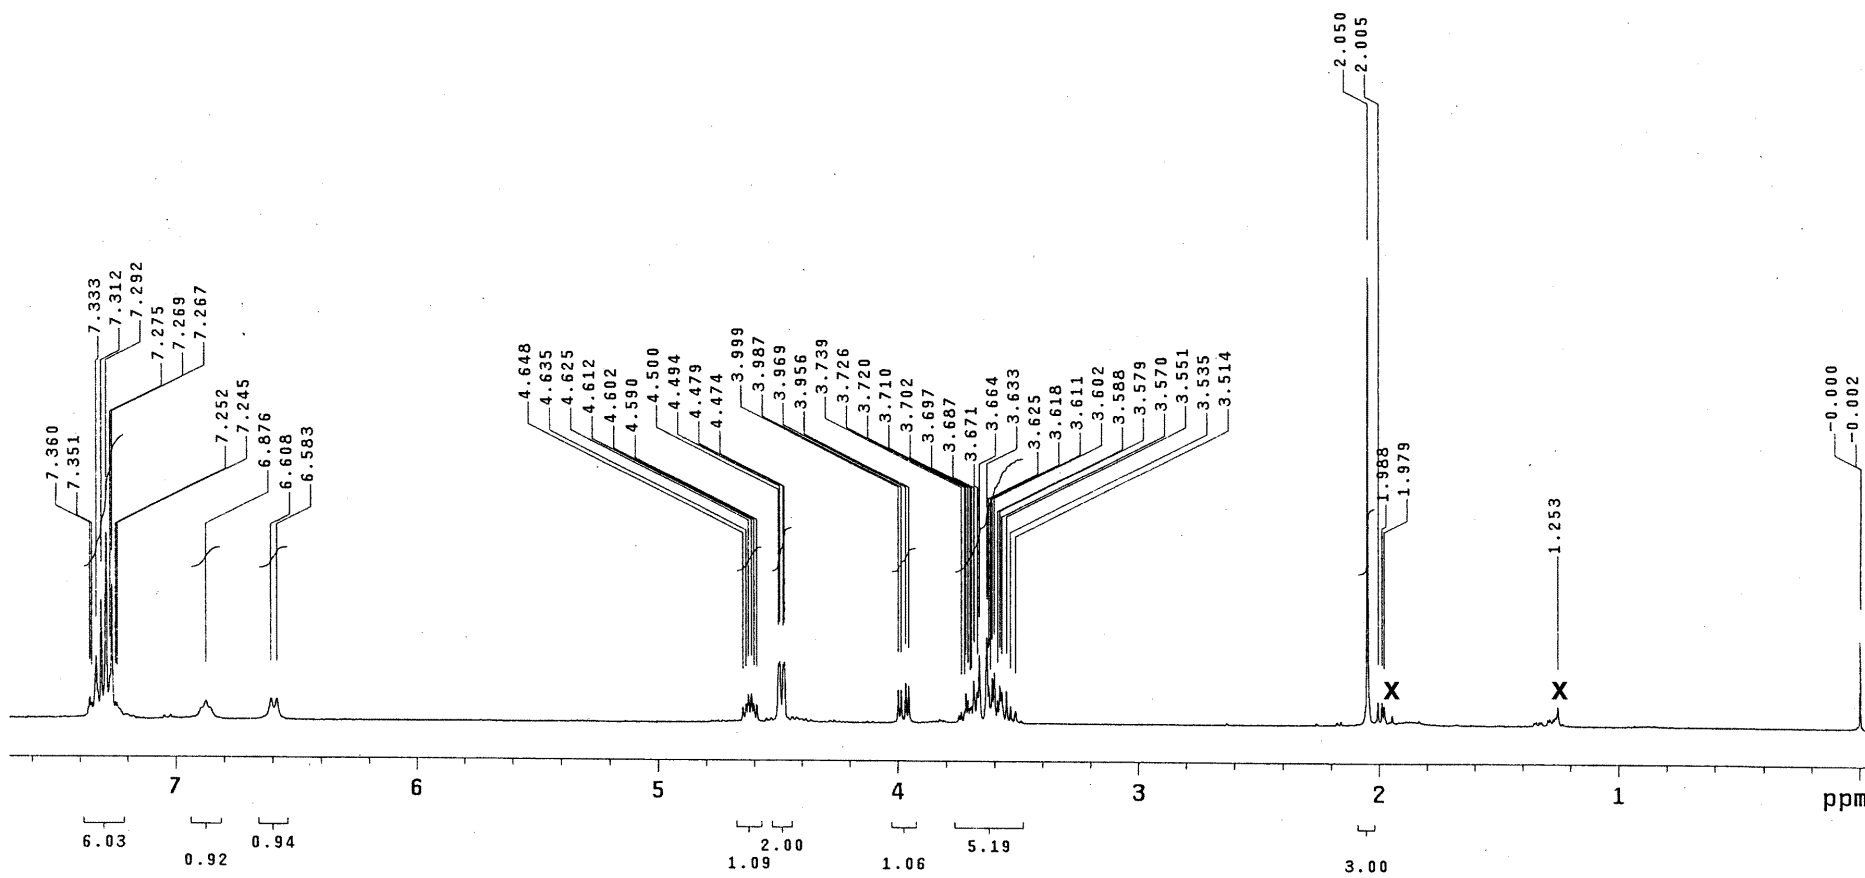

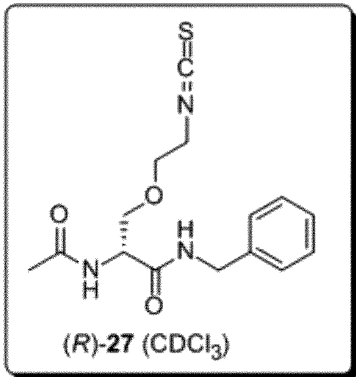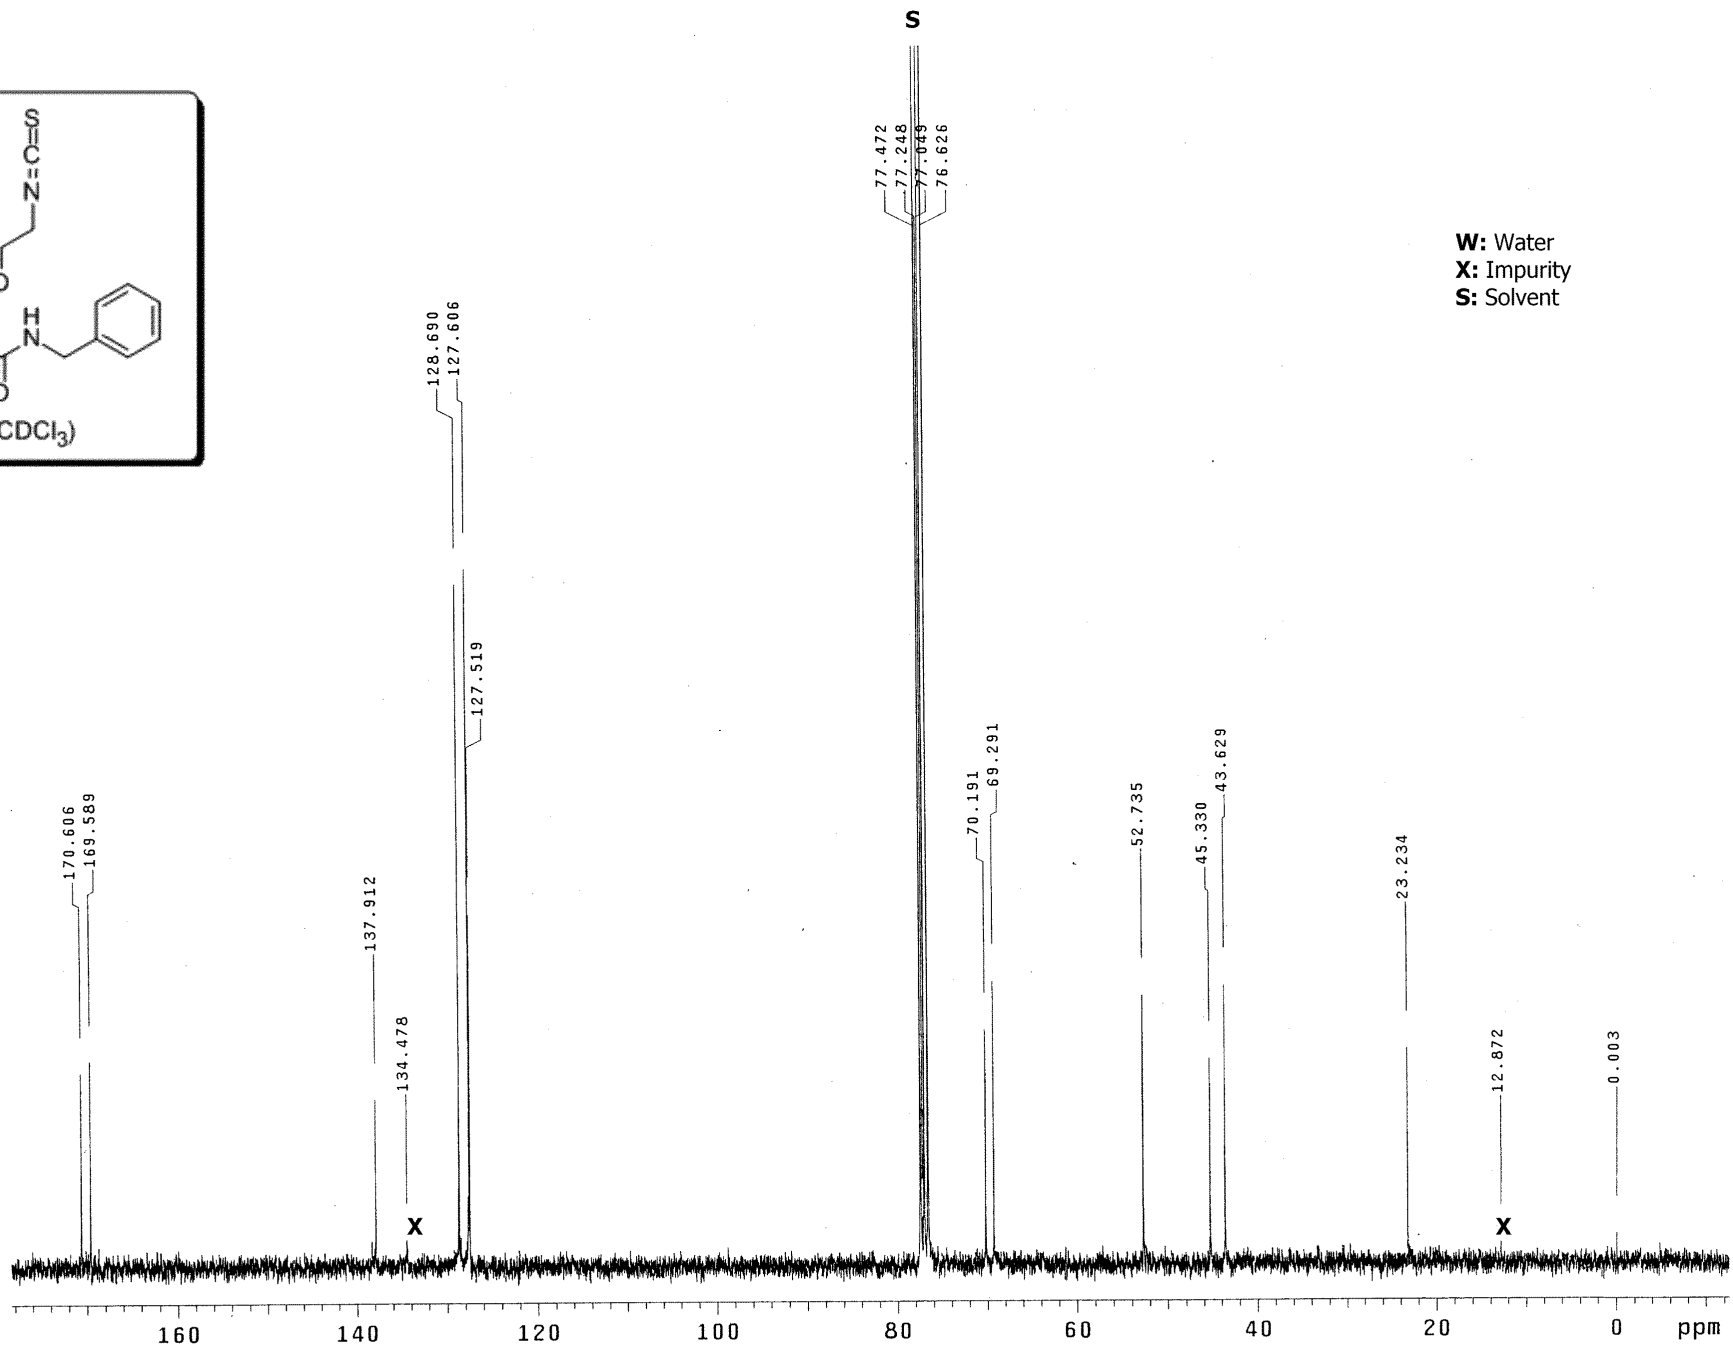

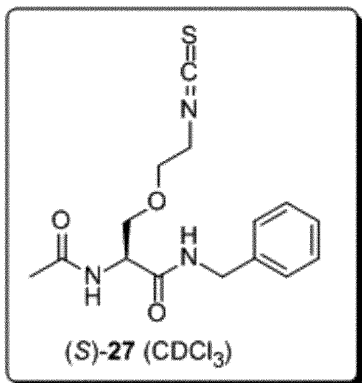

W: Water  
 X: Impurity  
 S: Solvent

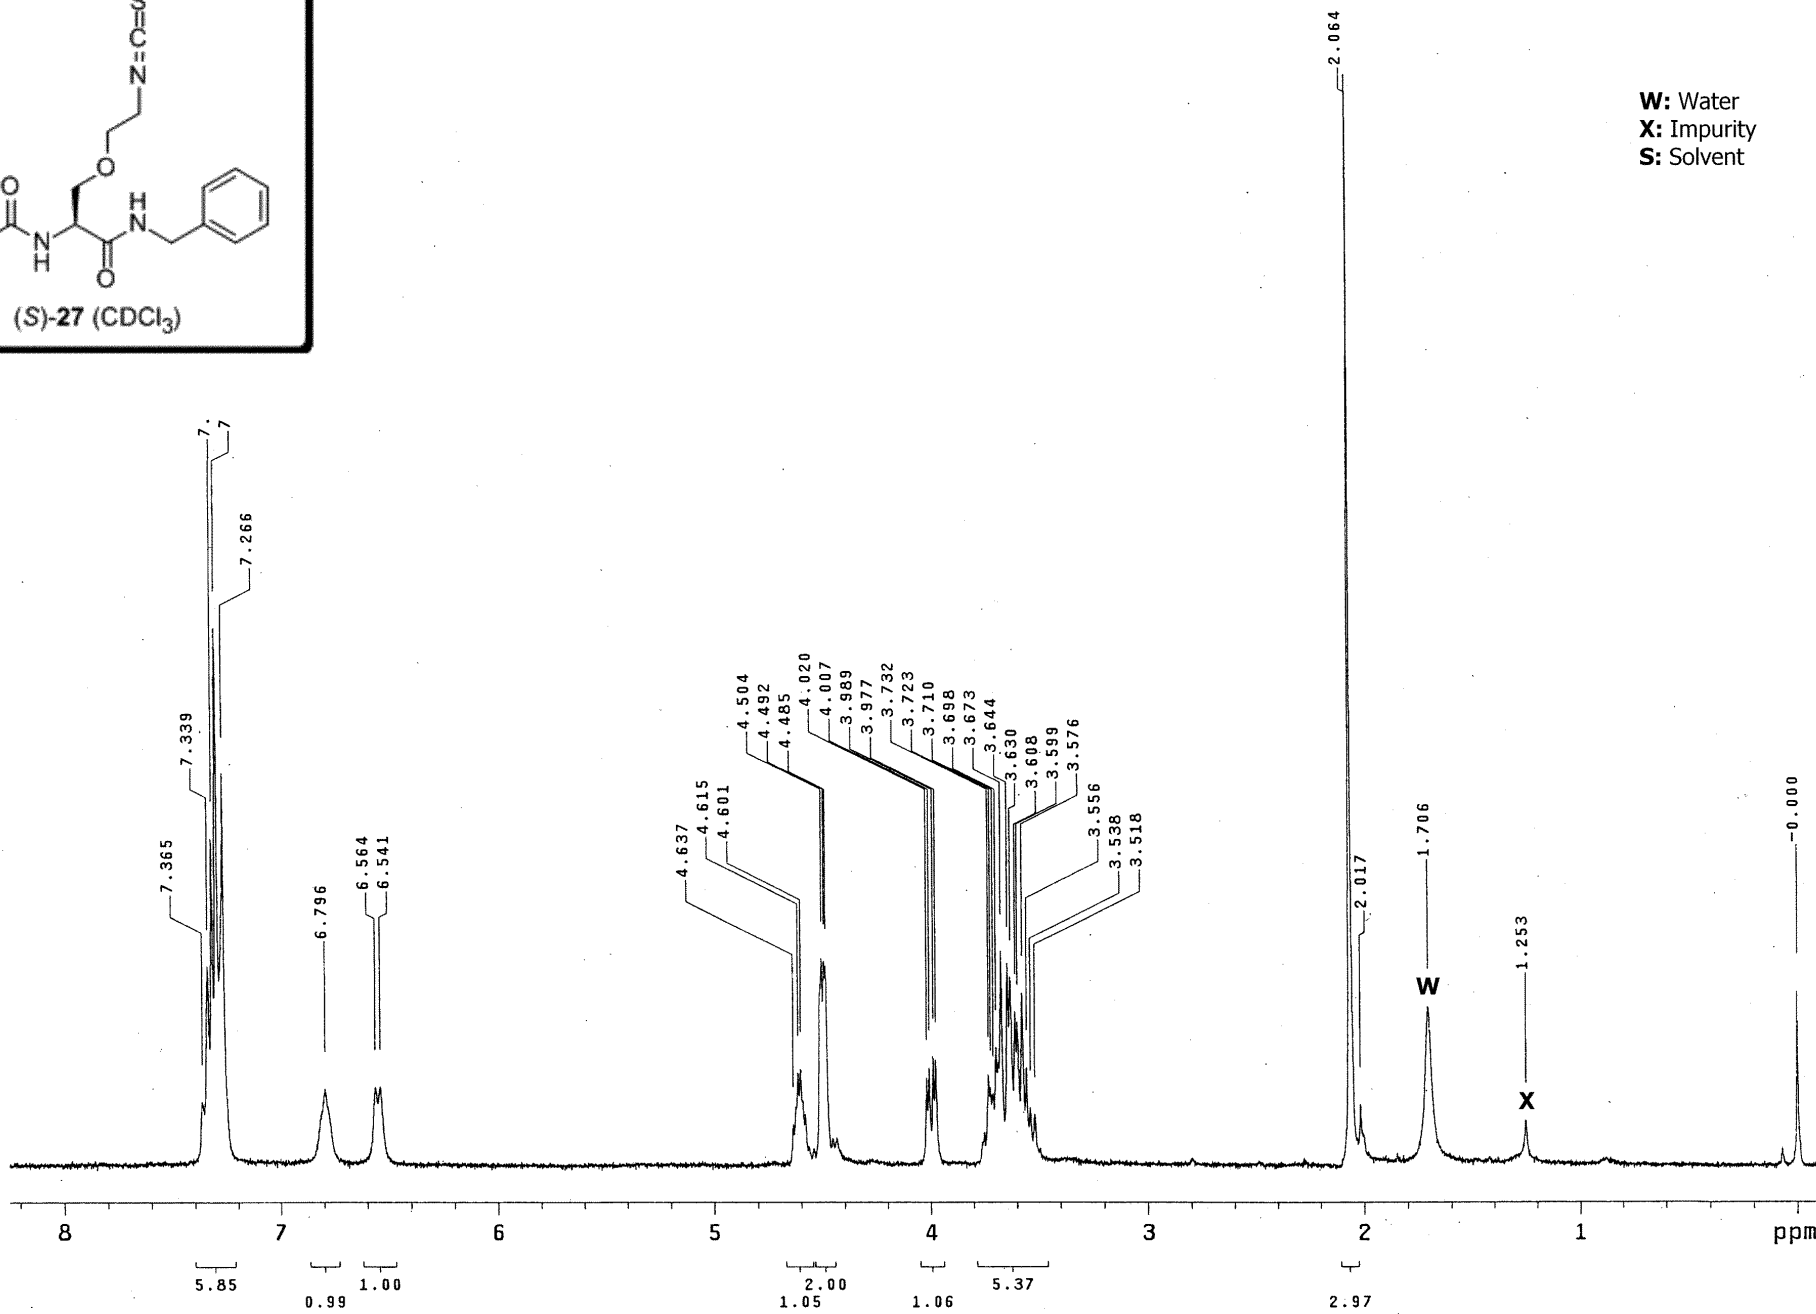



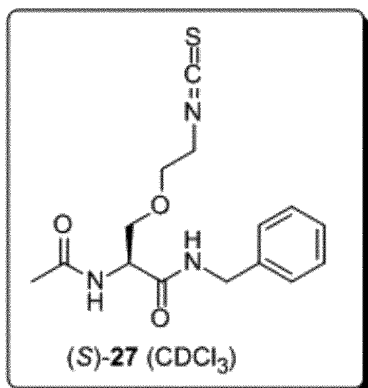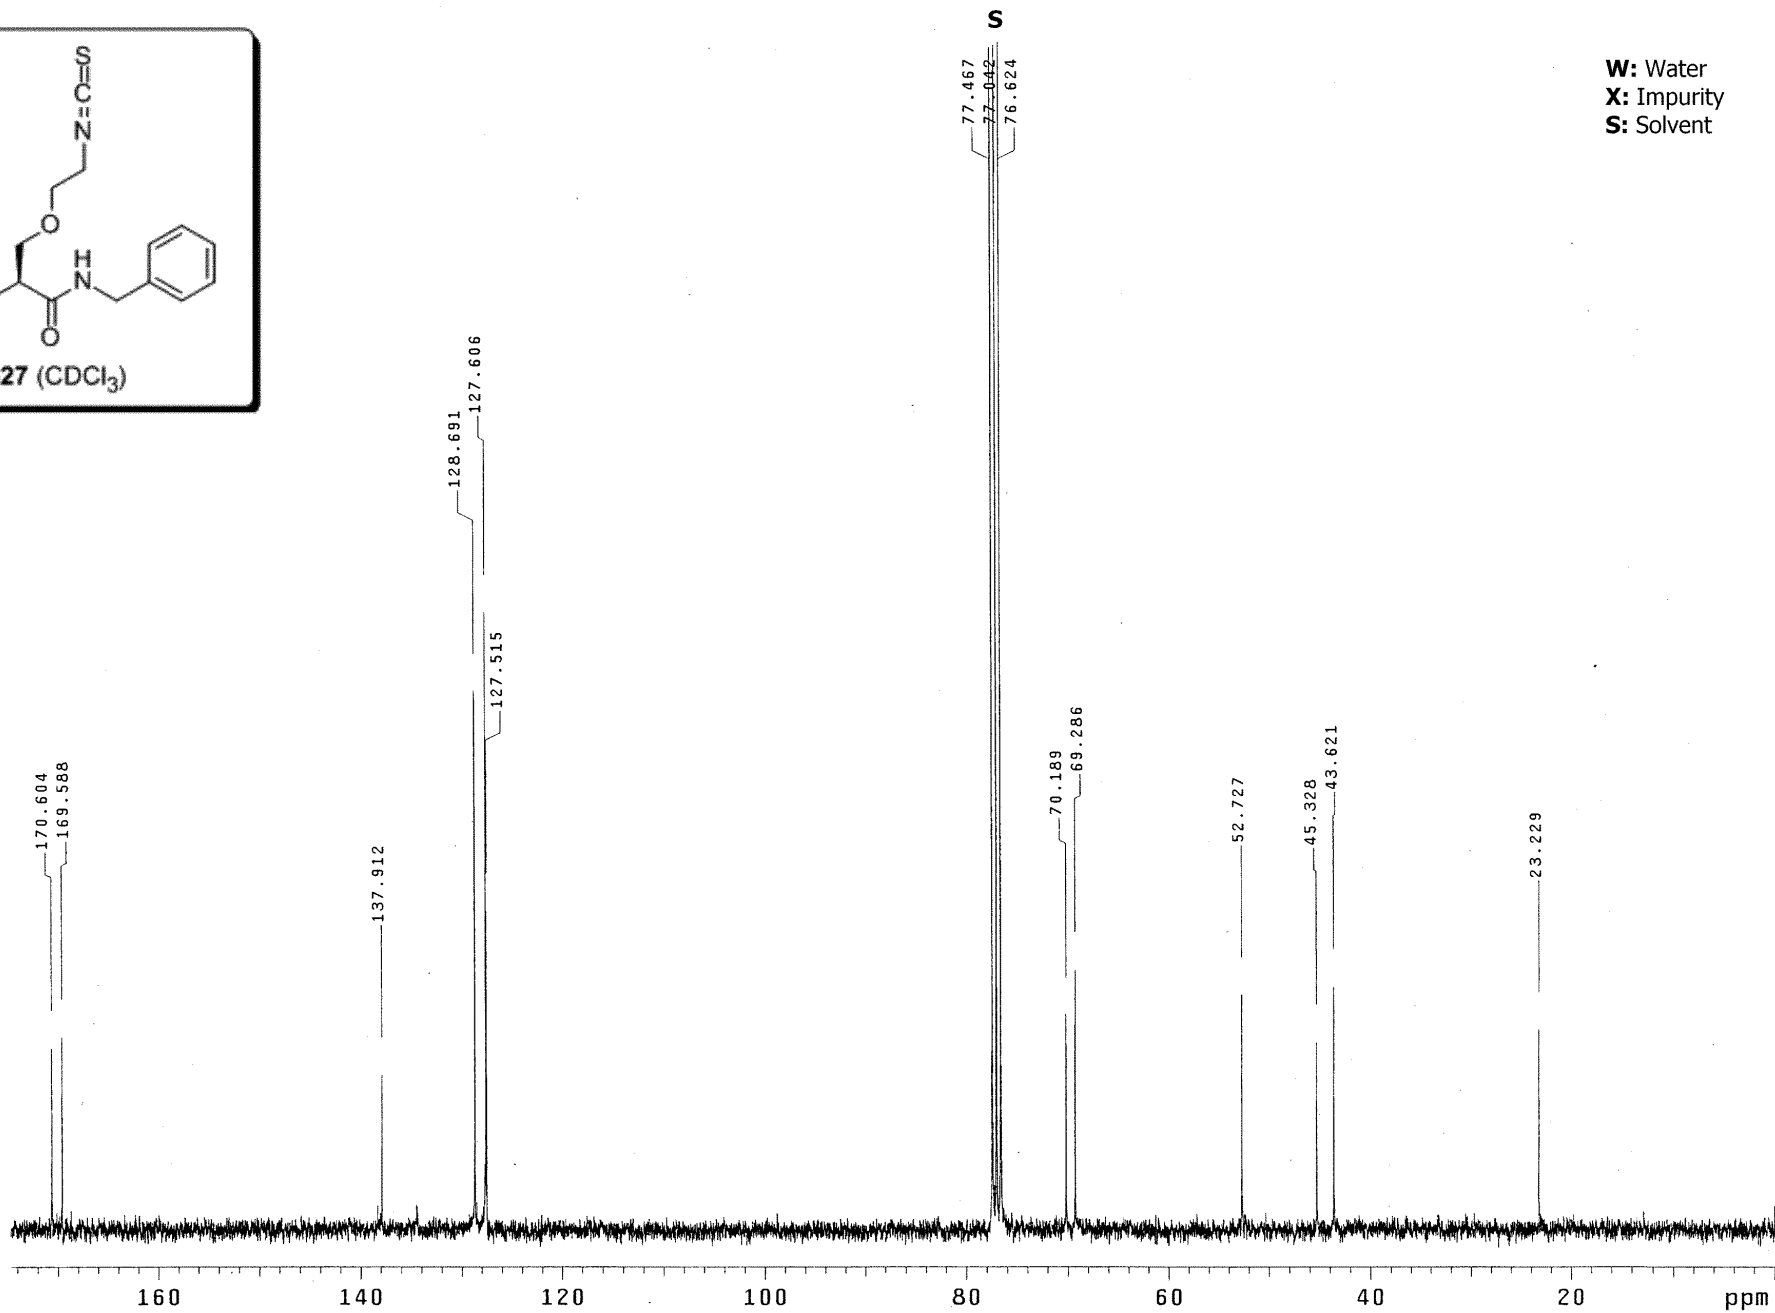

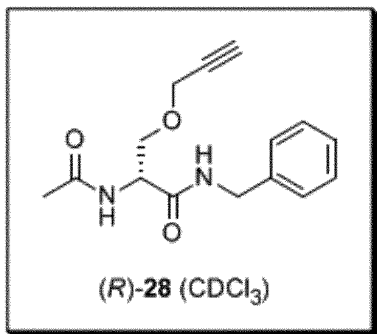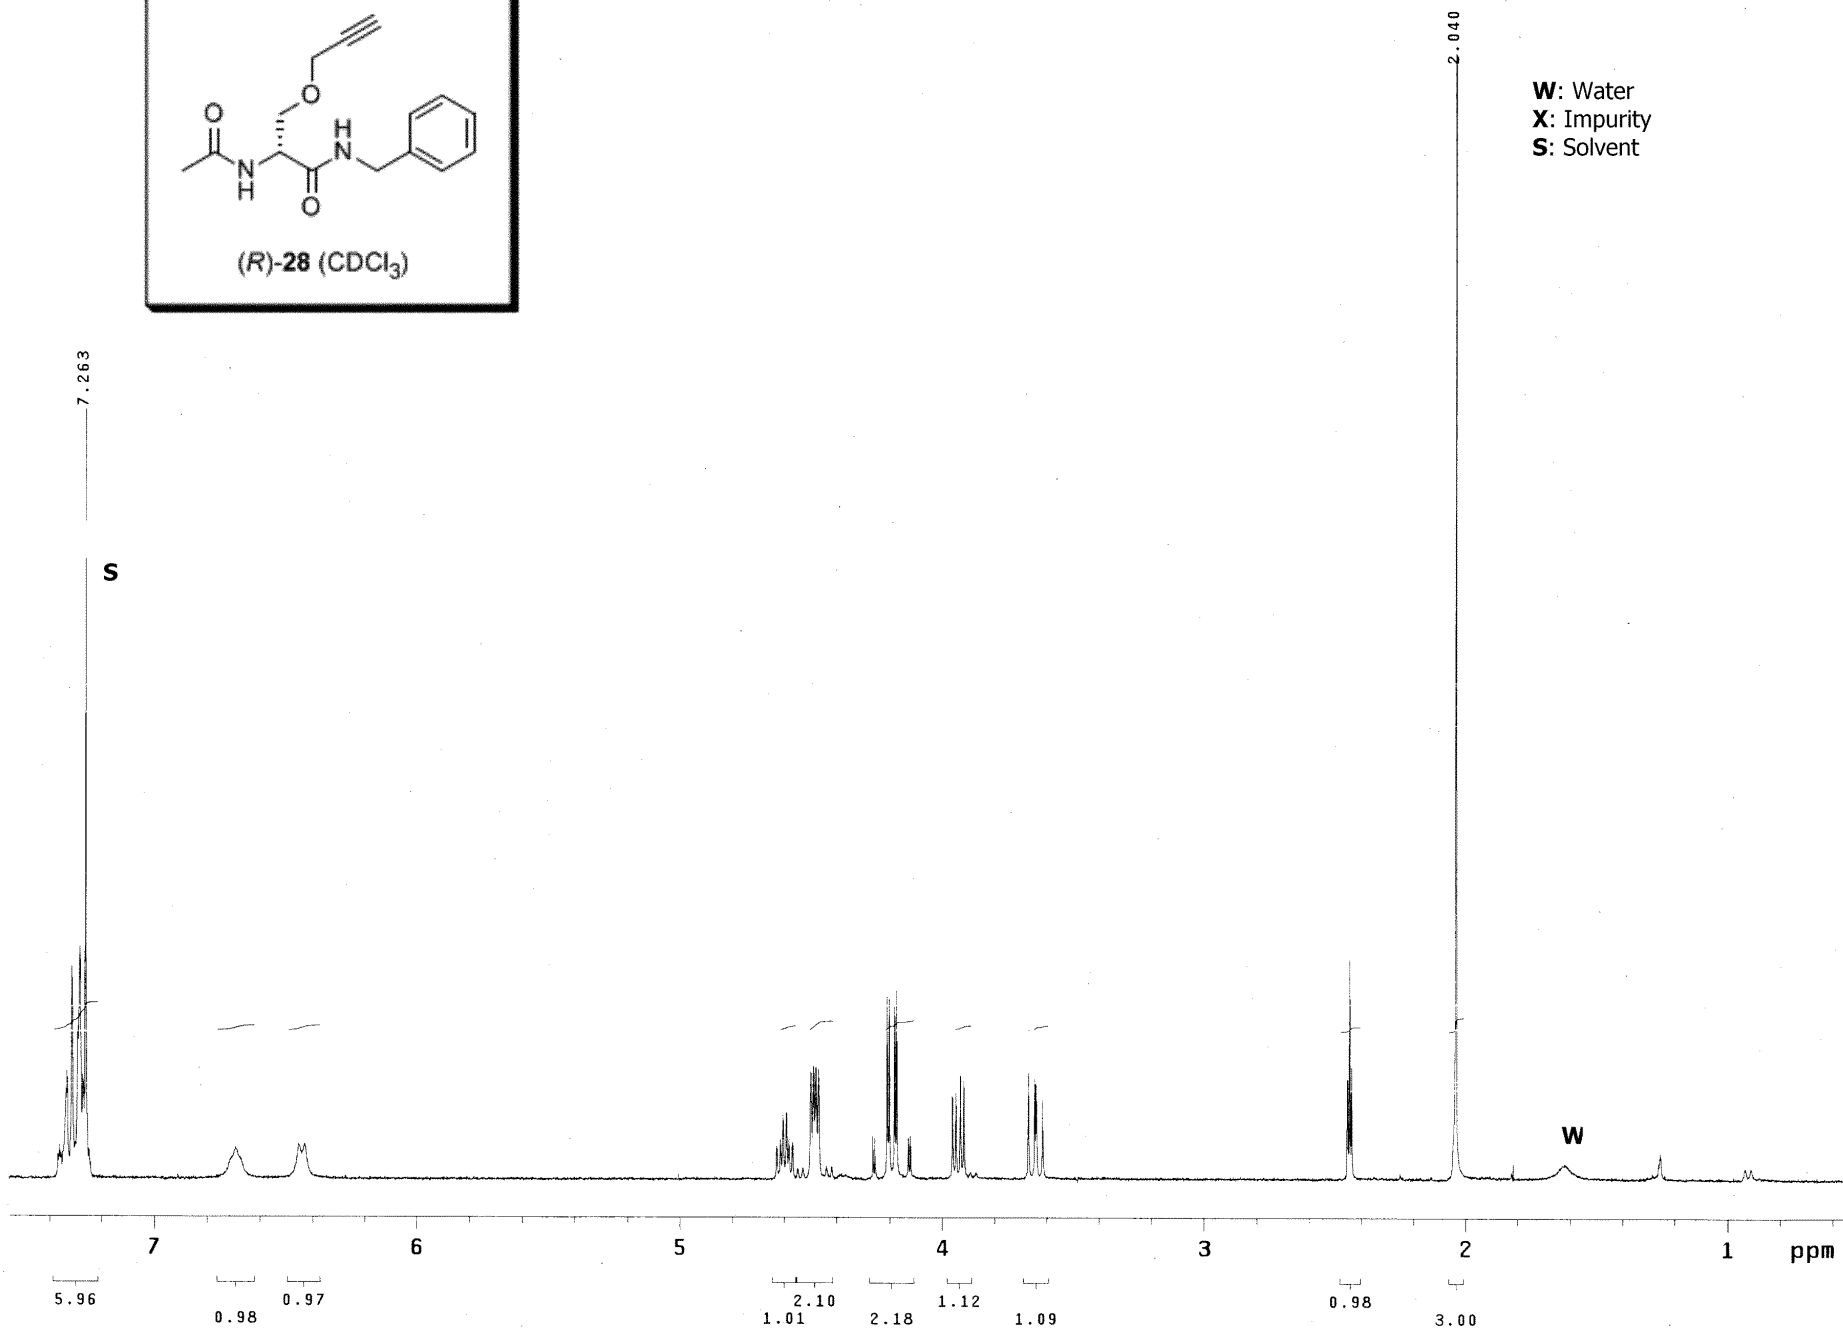

S70

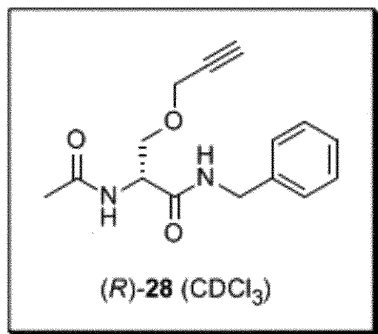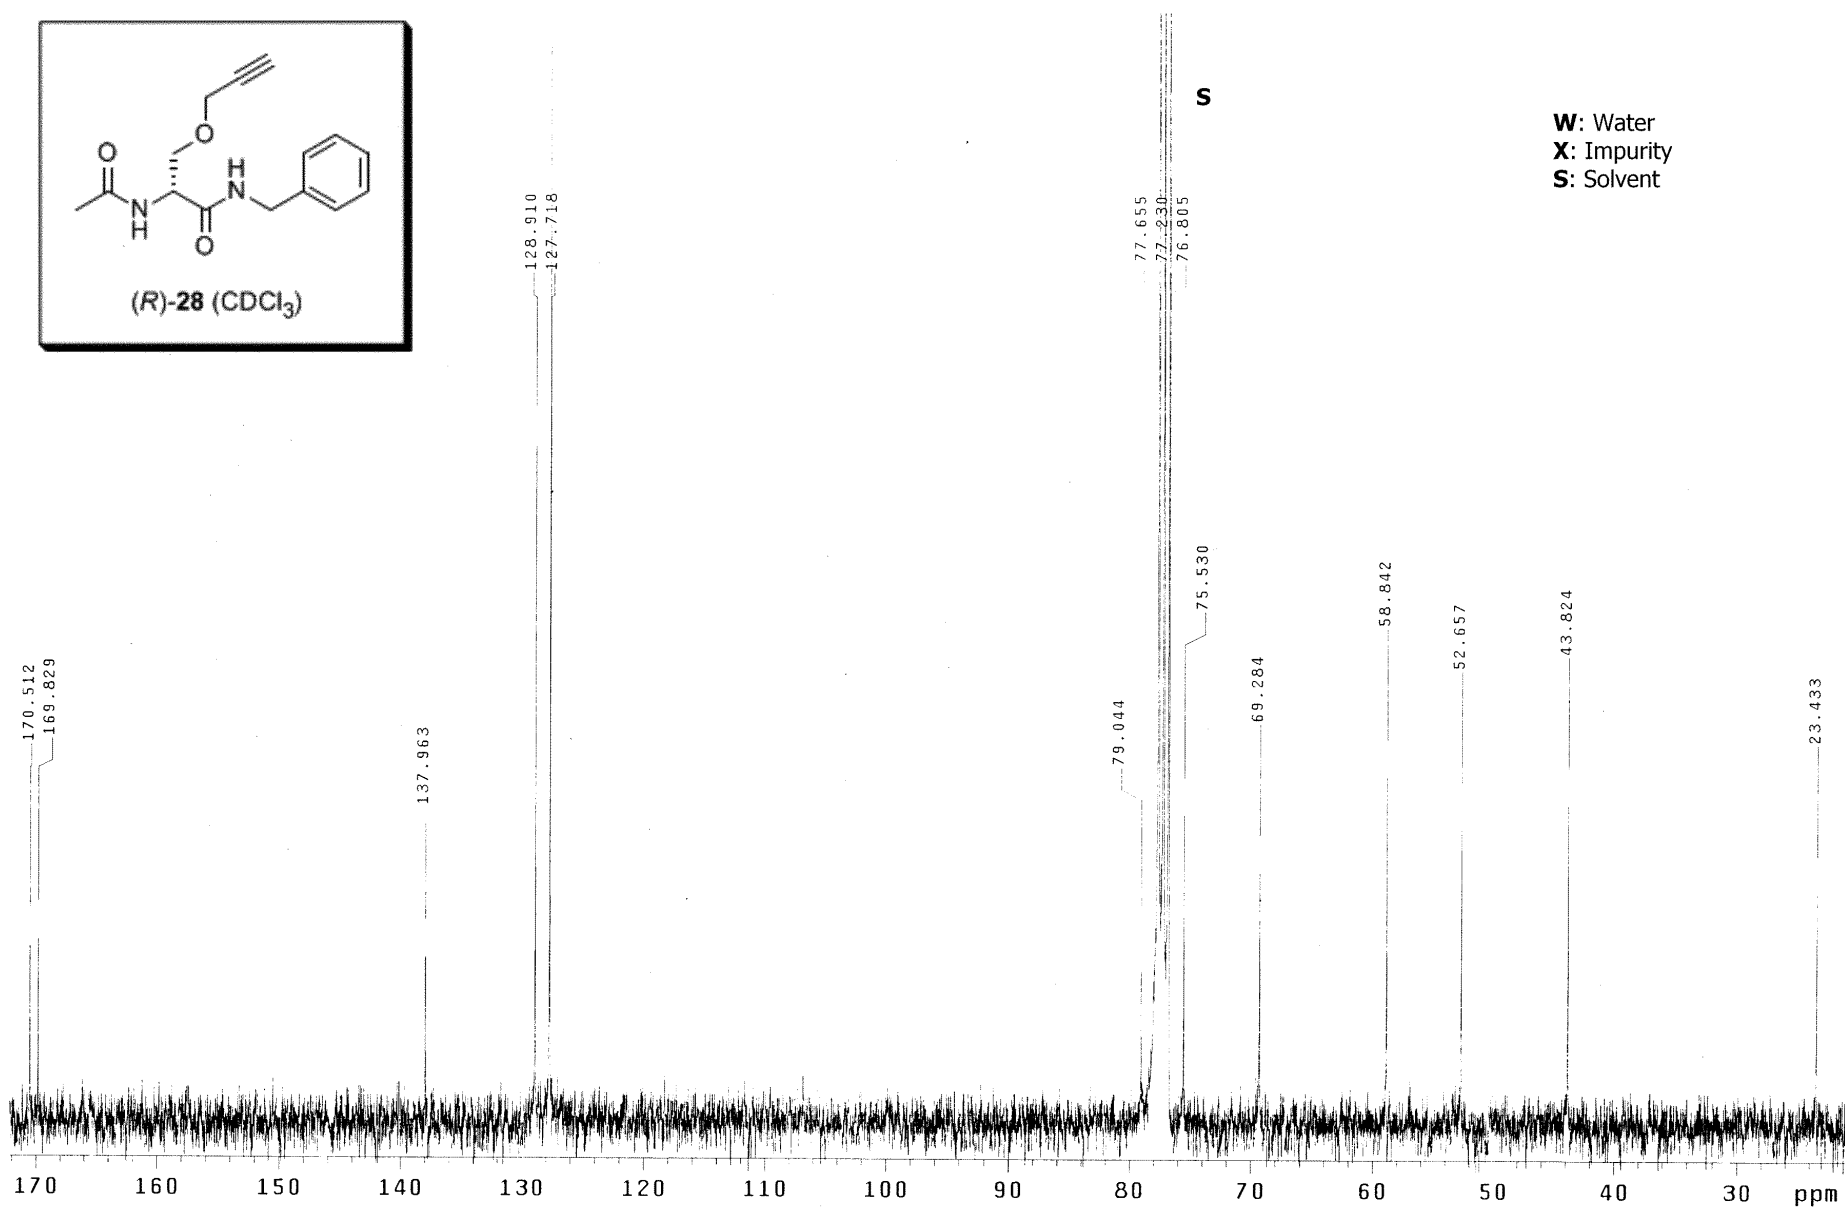

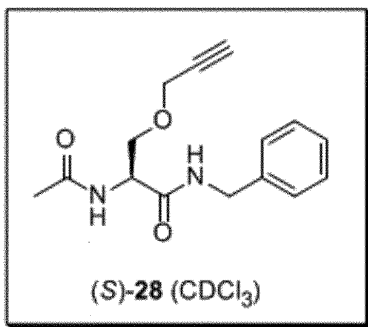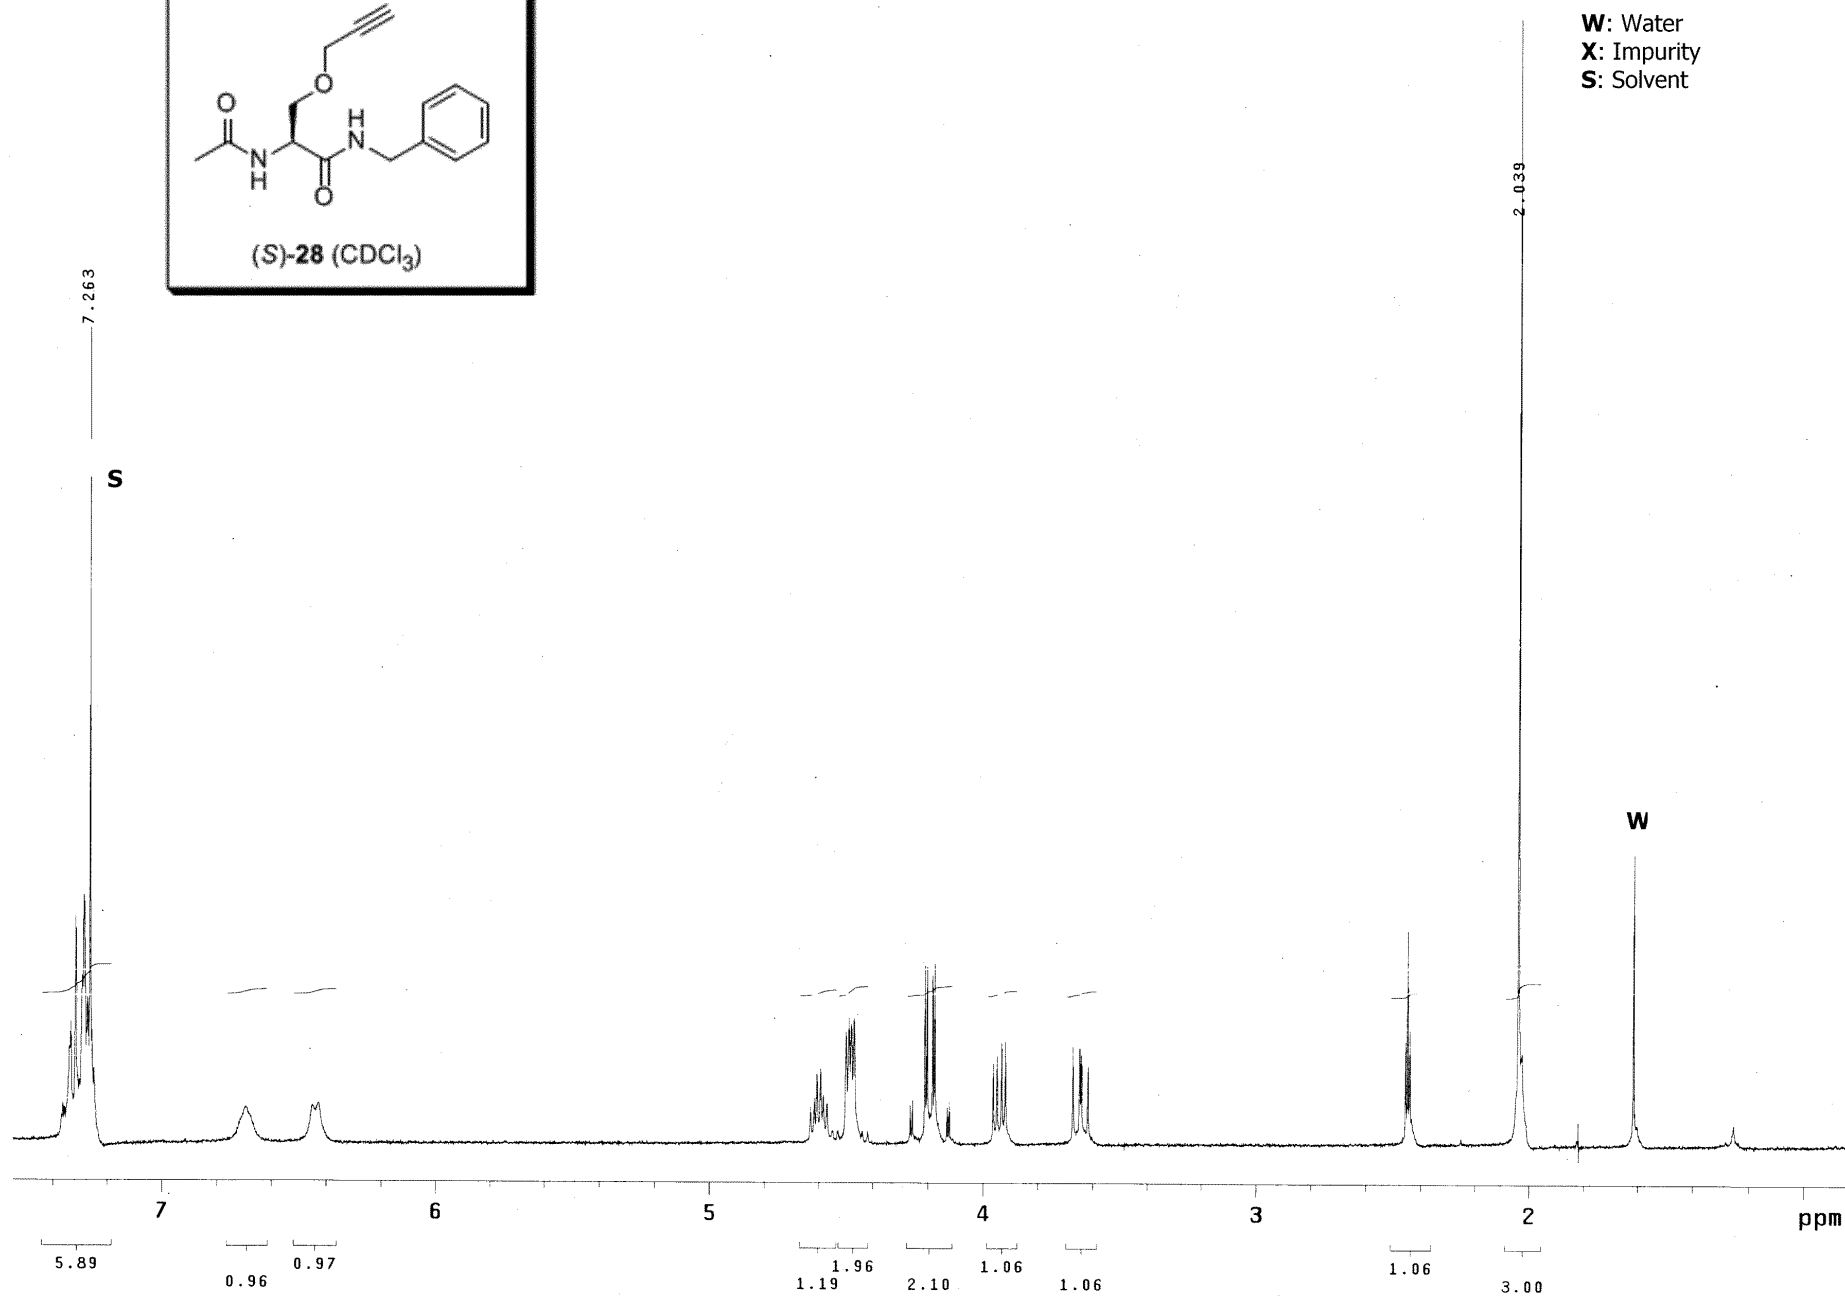

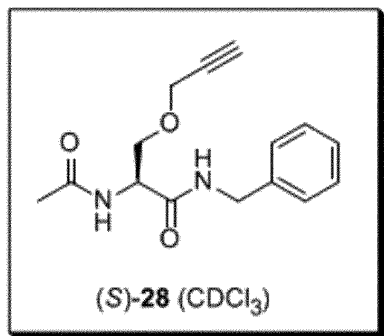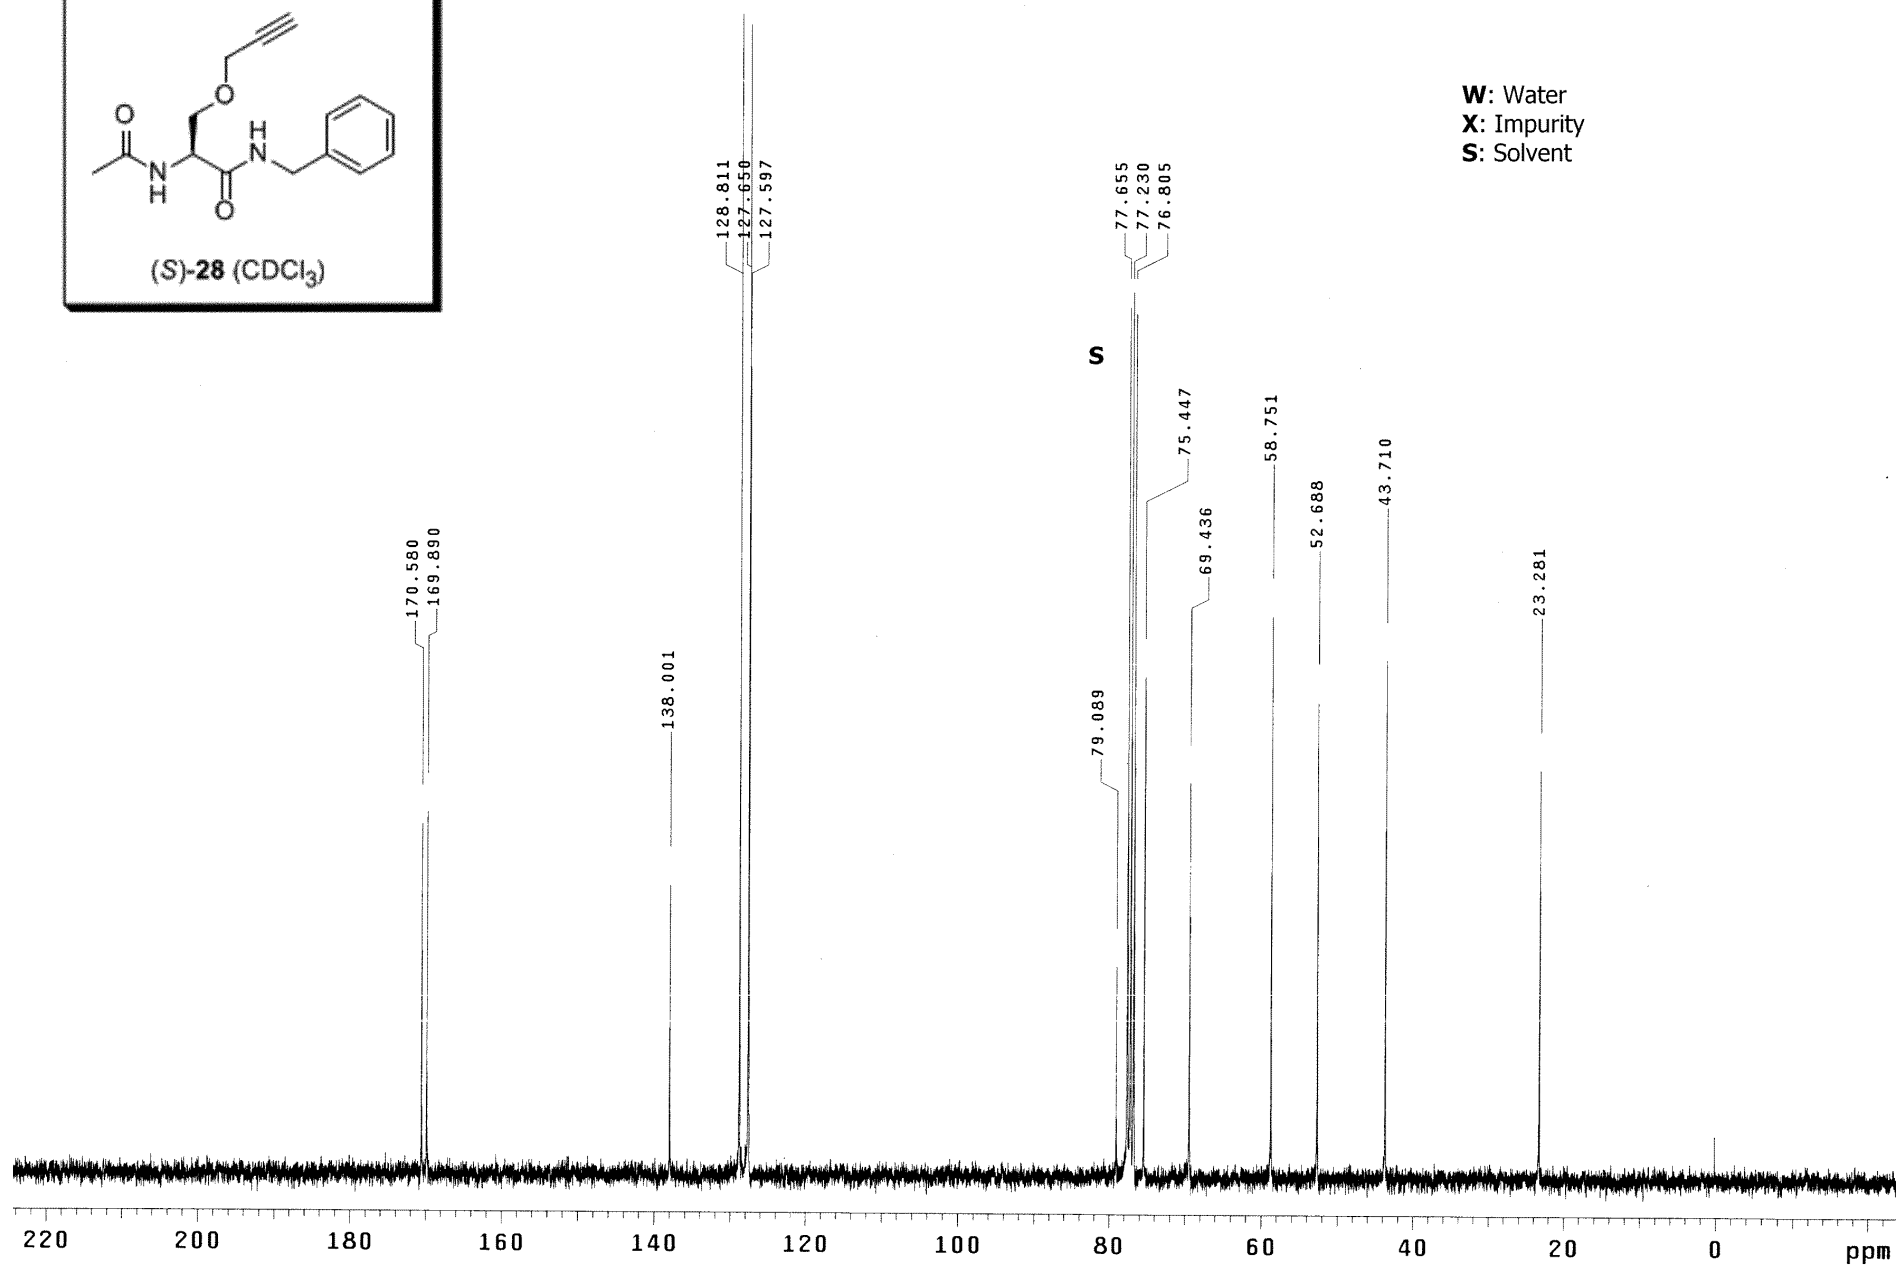

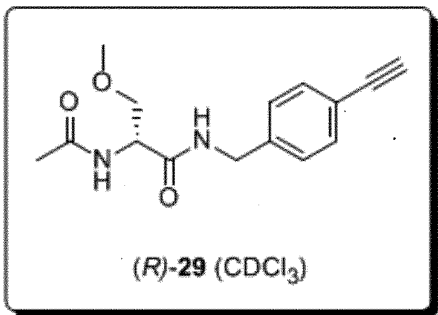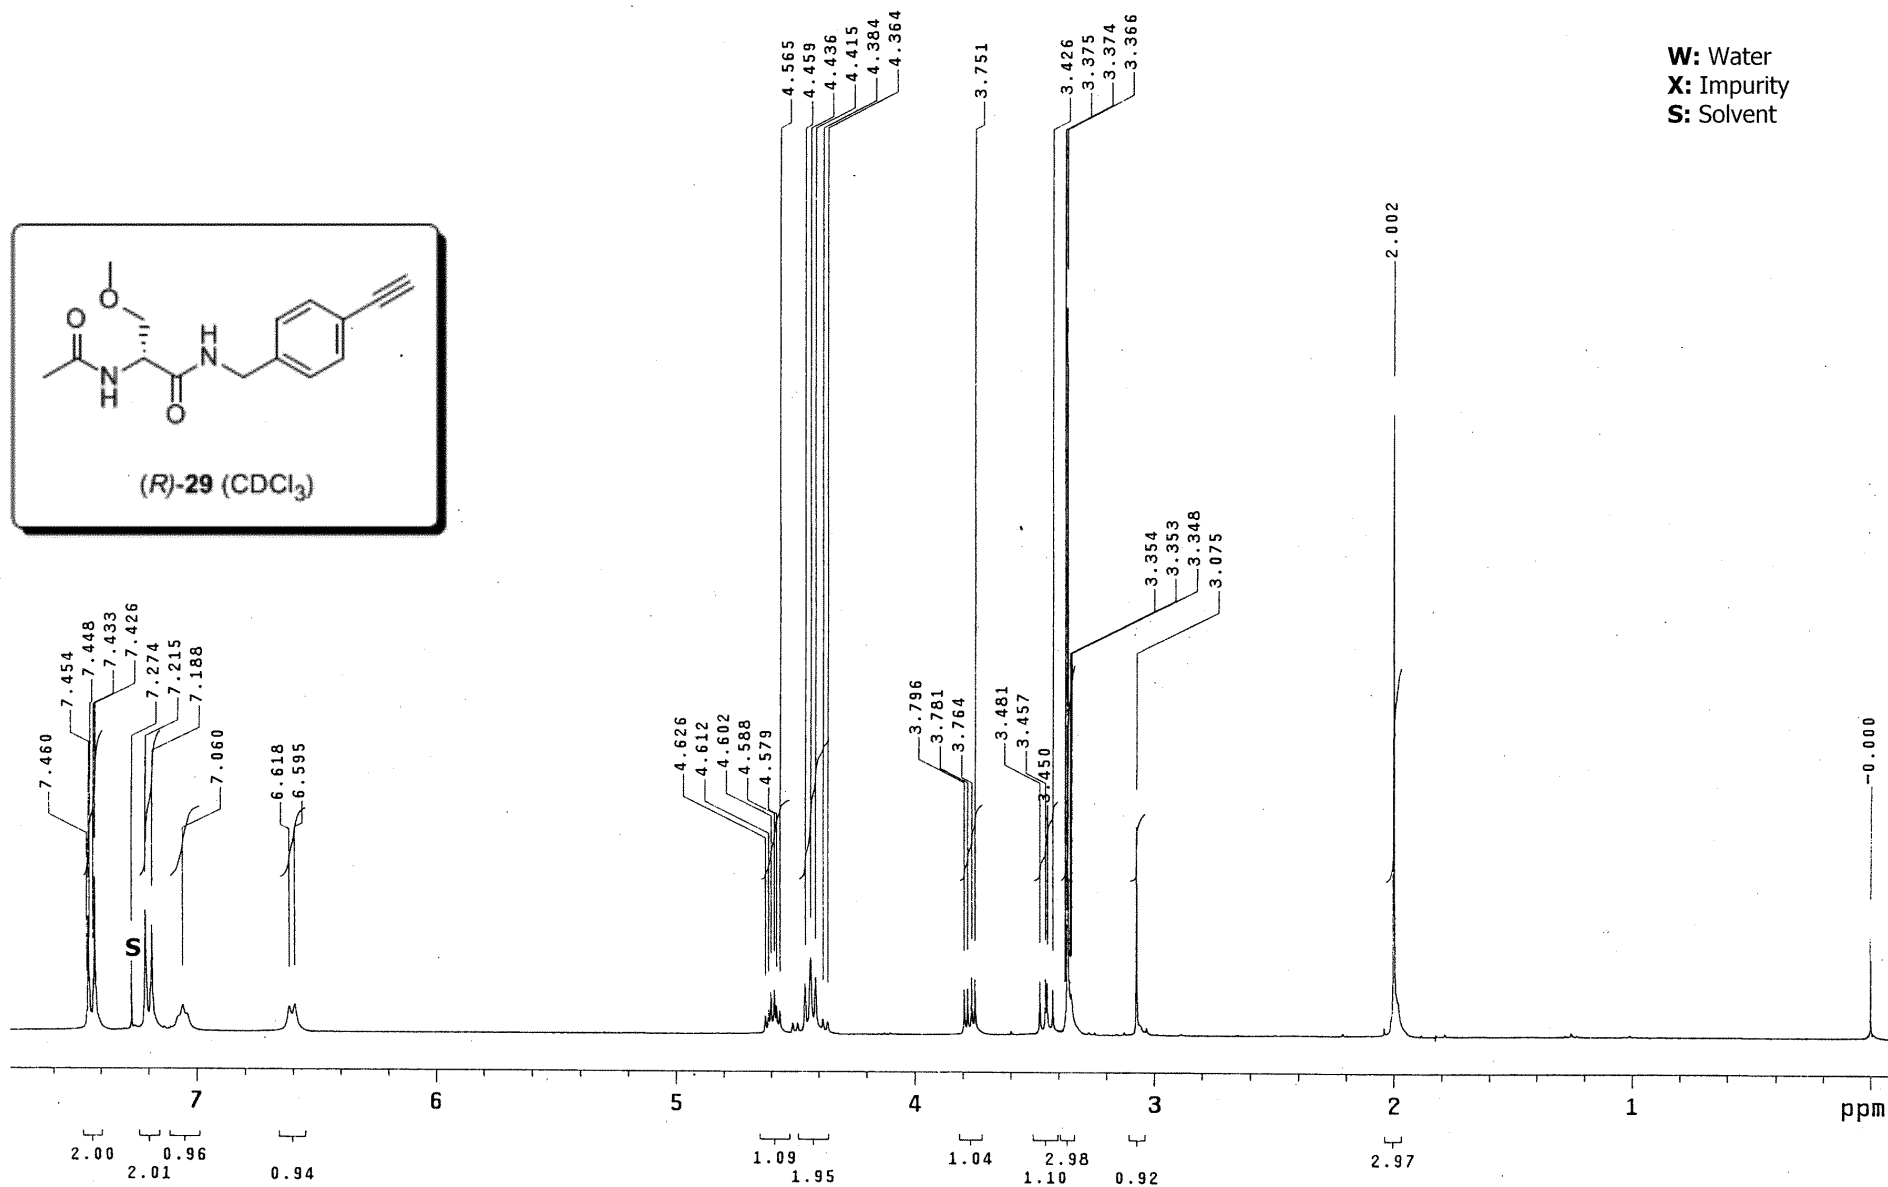

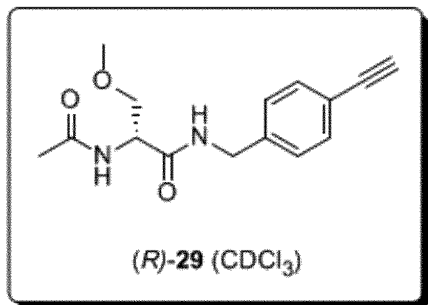

W: Water  
X: Impurity  
S: Solvent

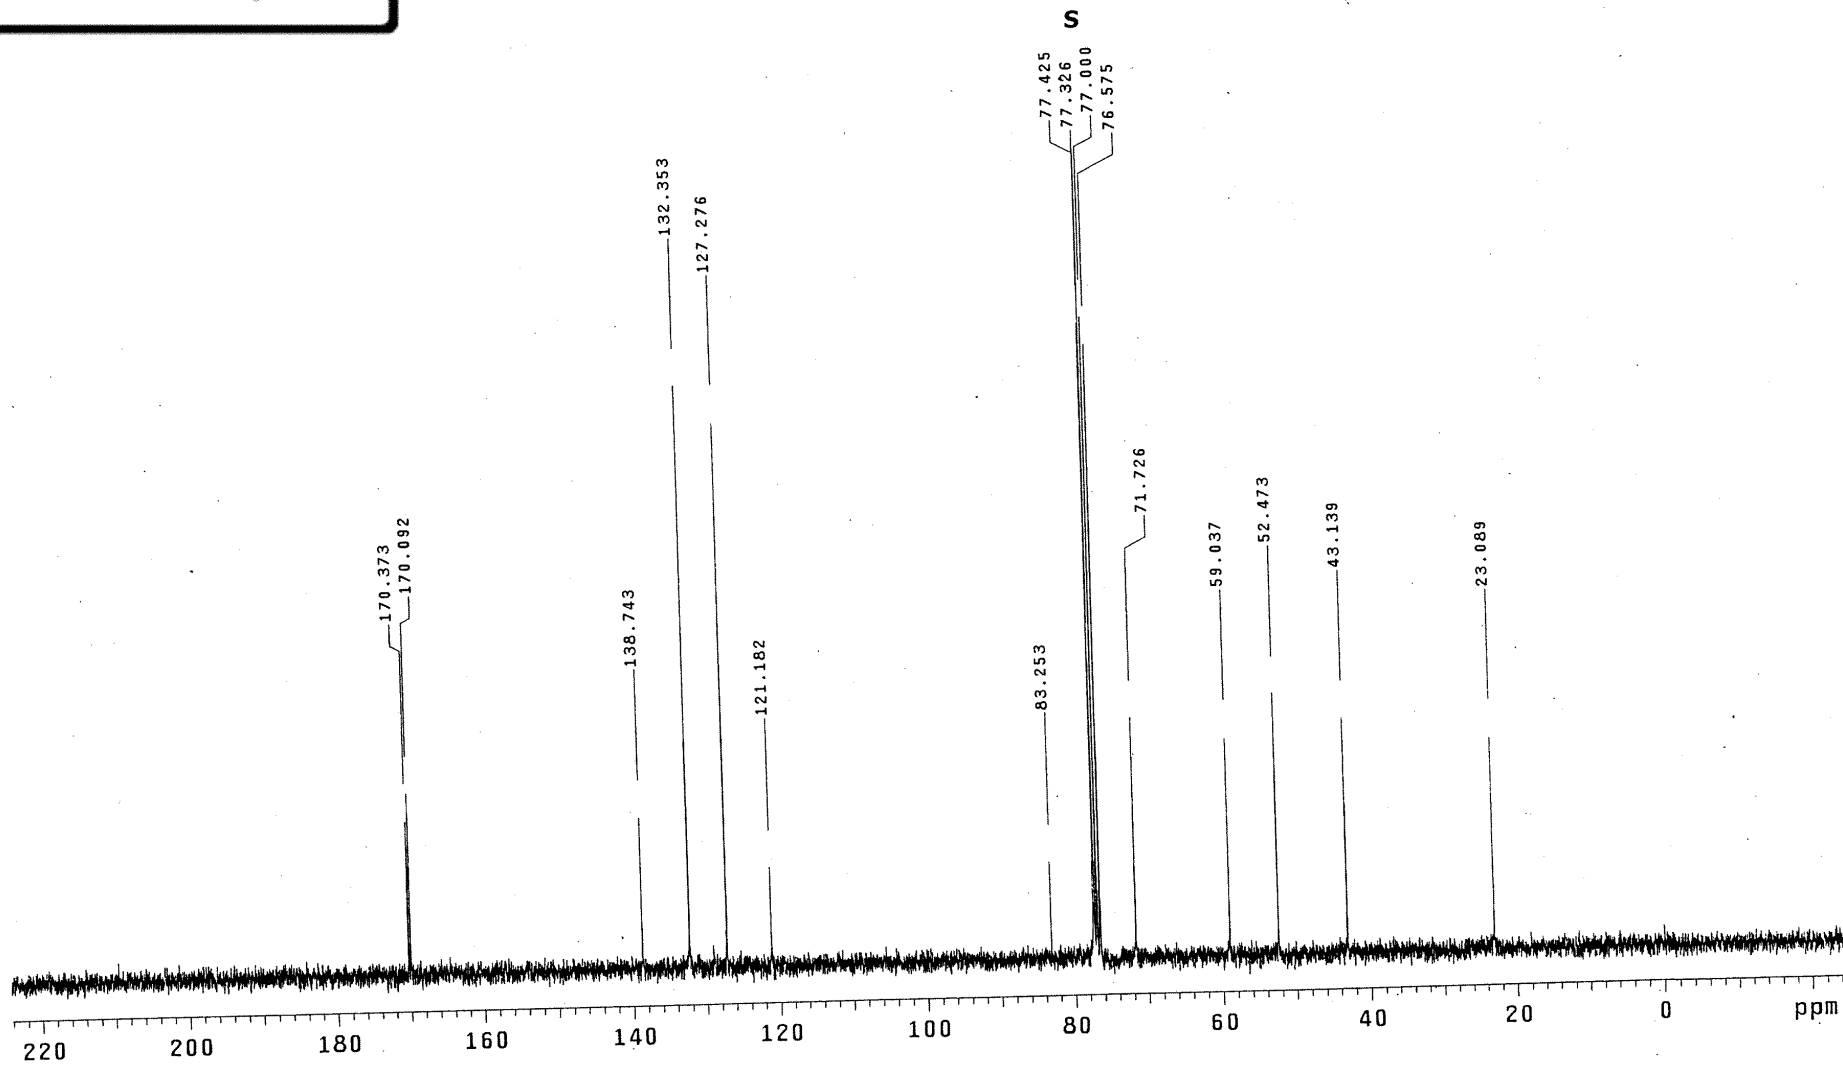

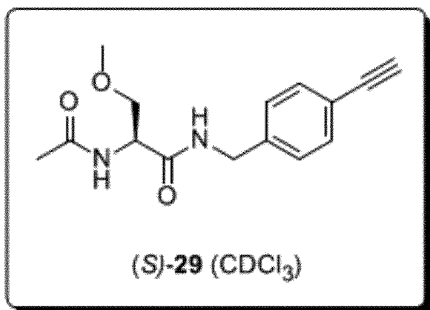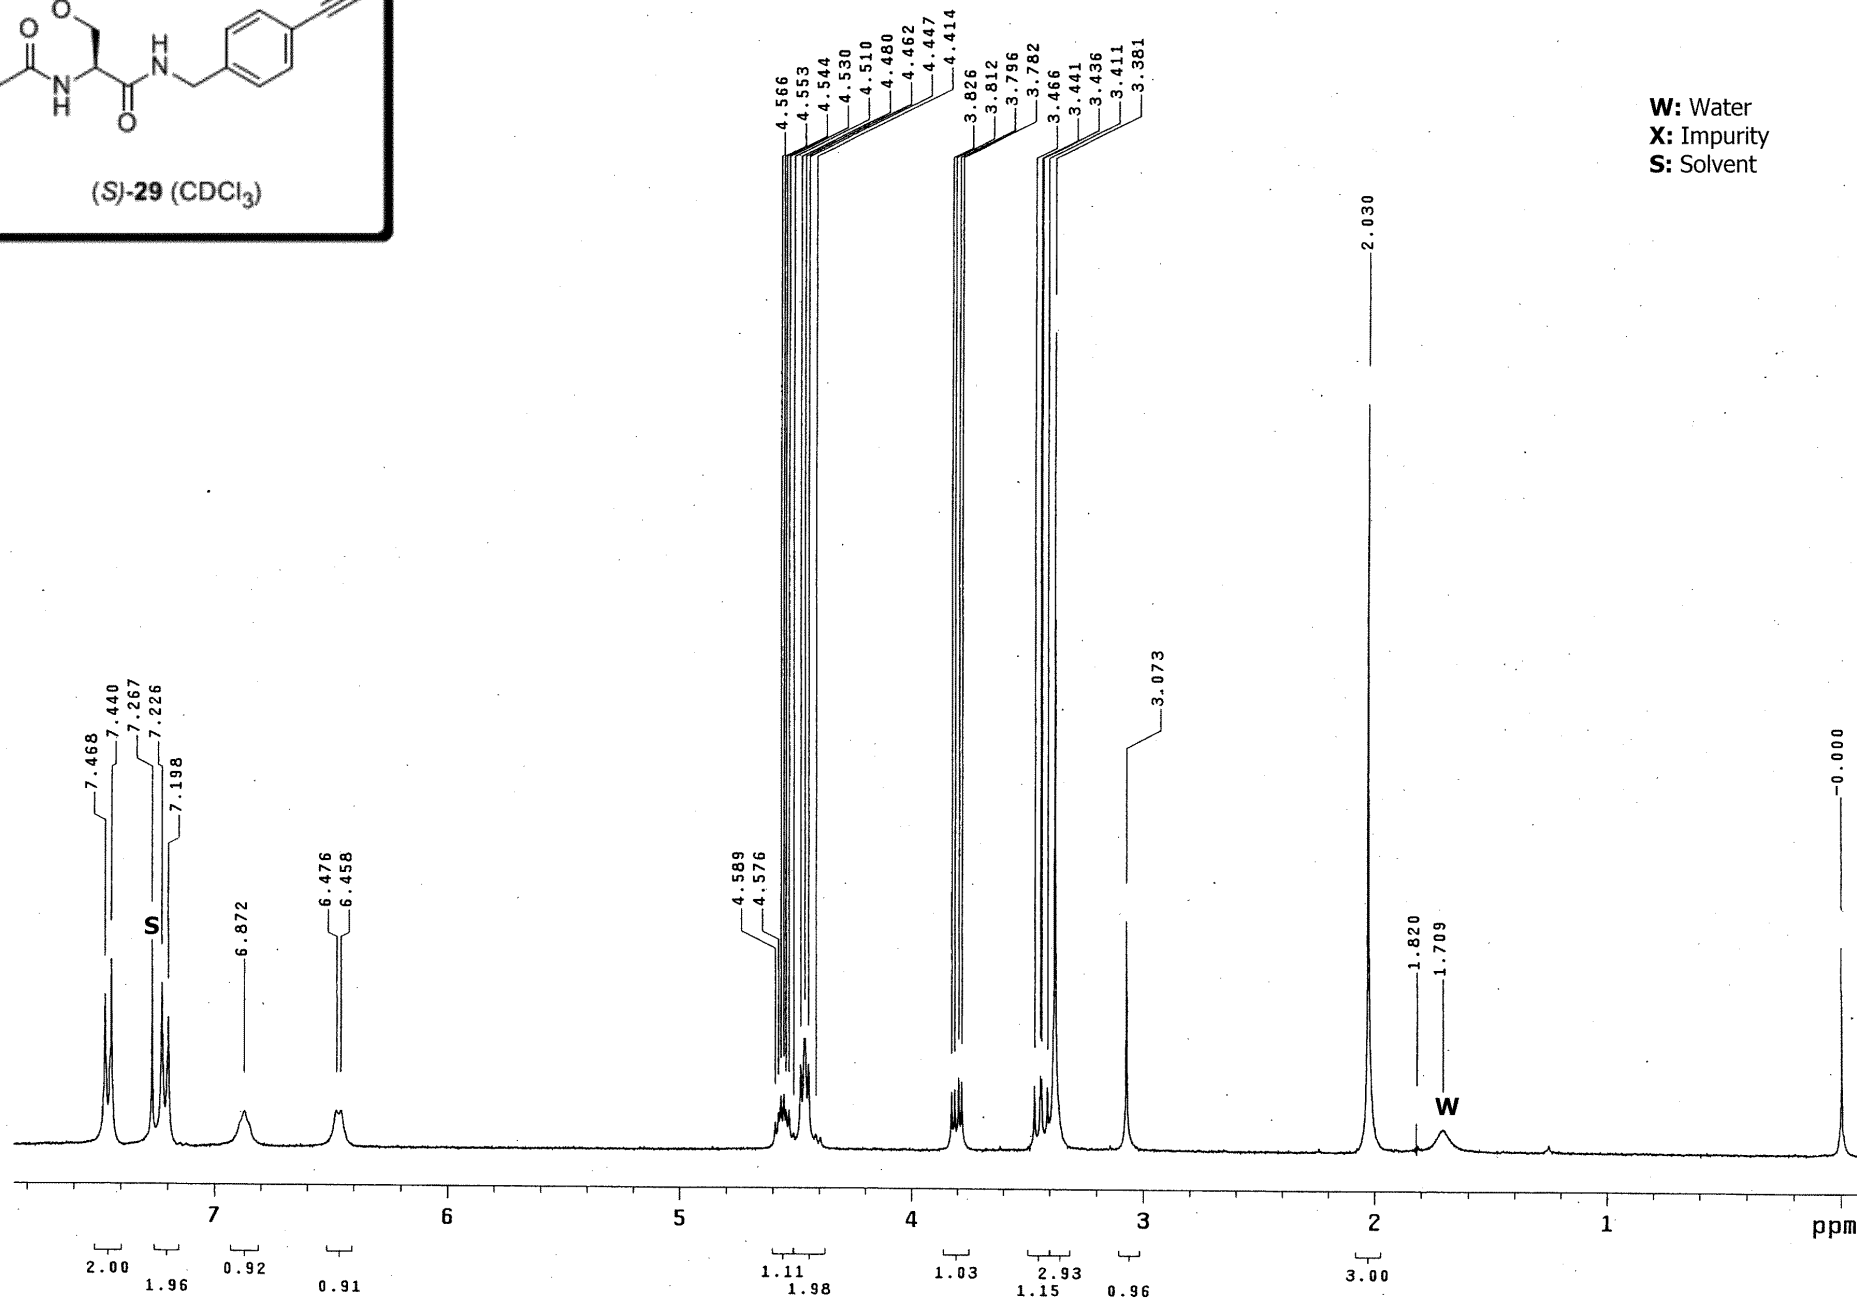

S76



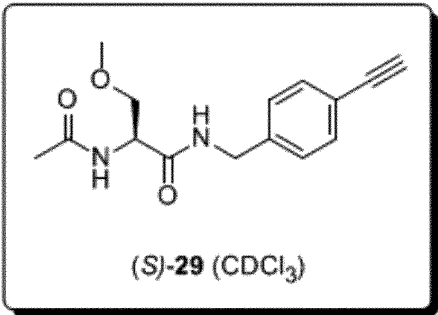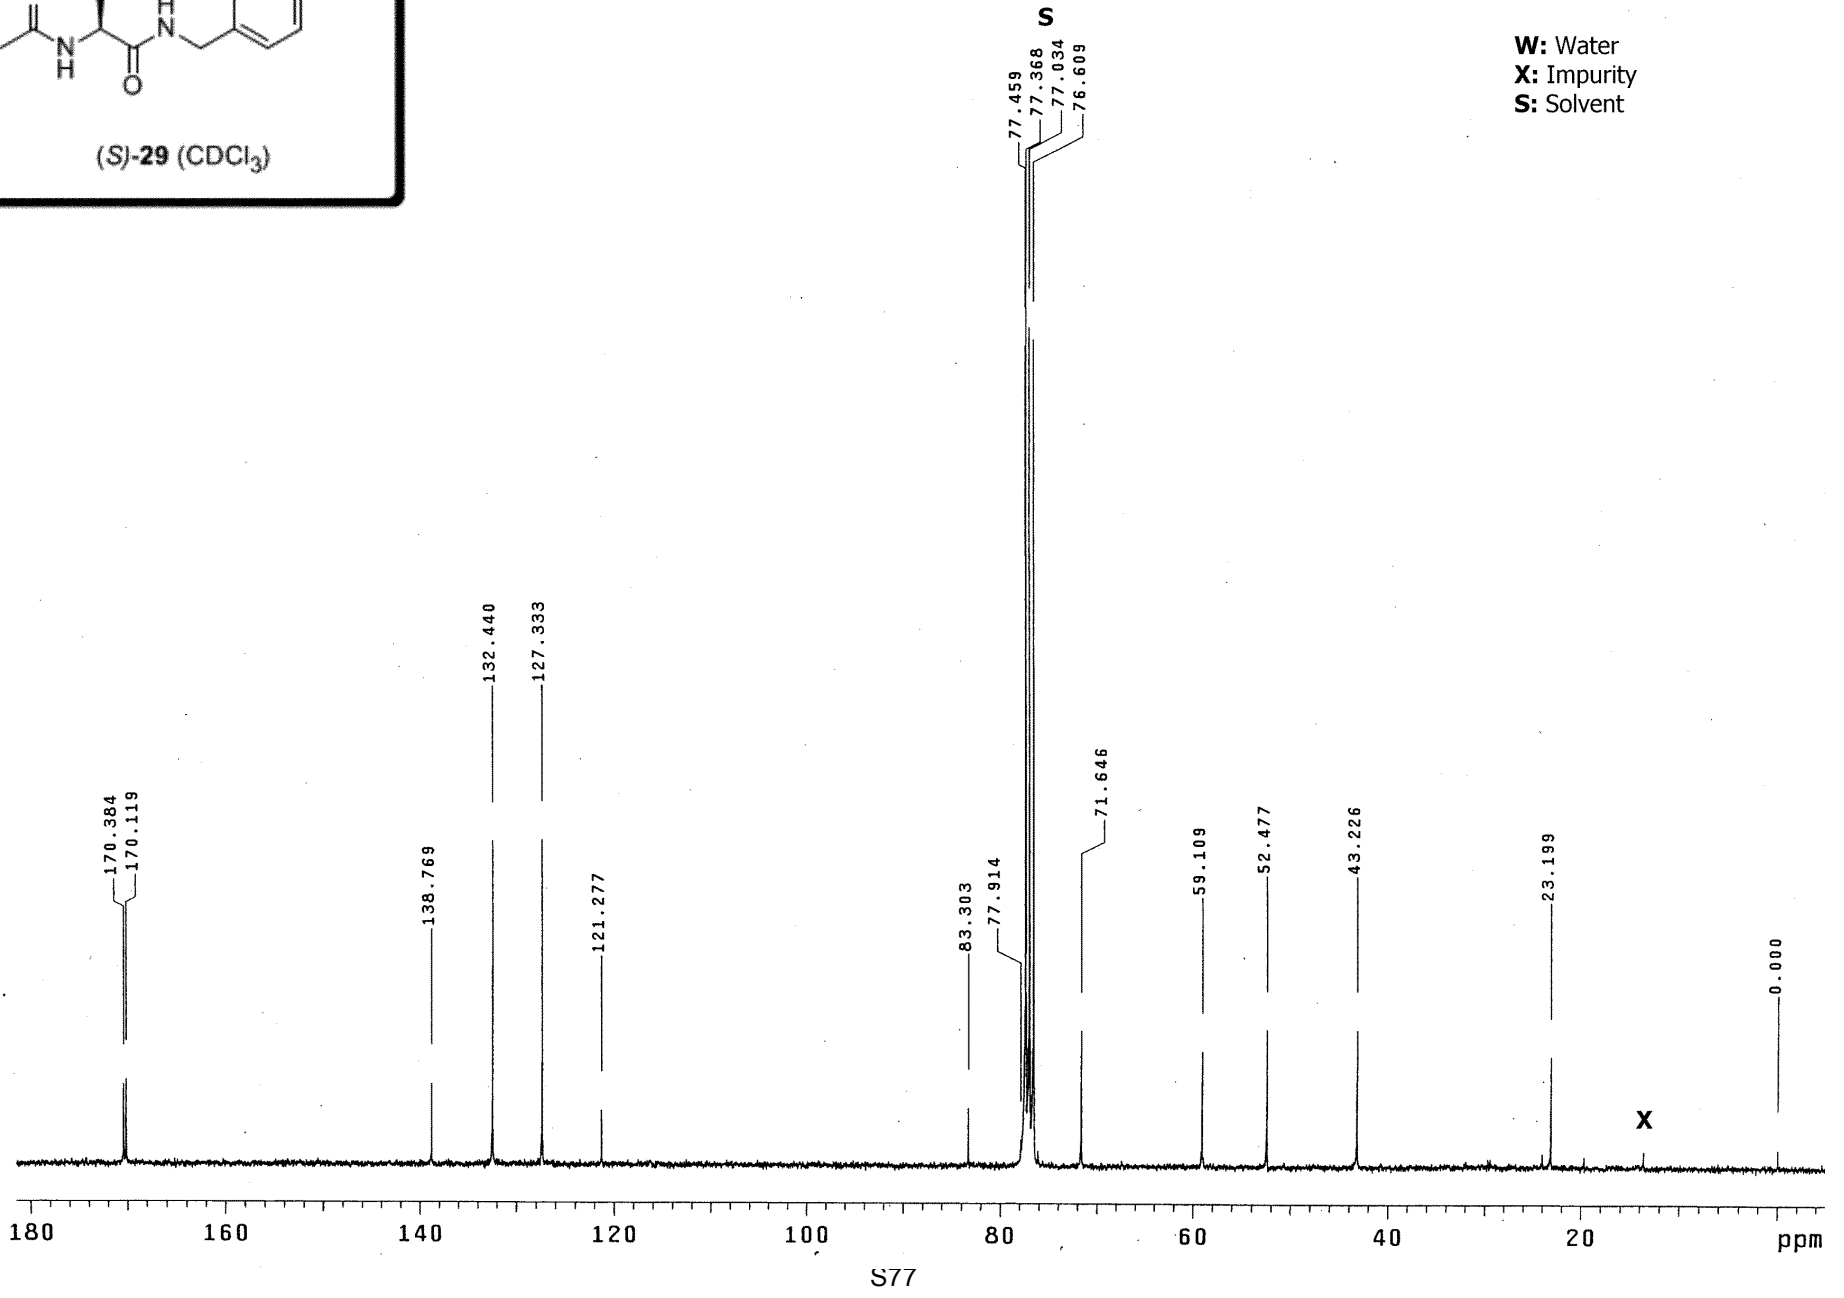

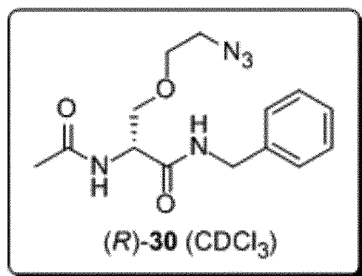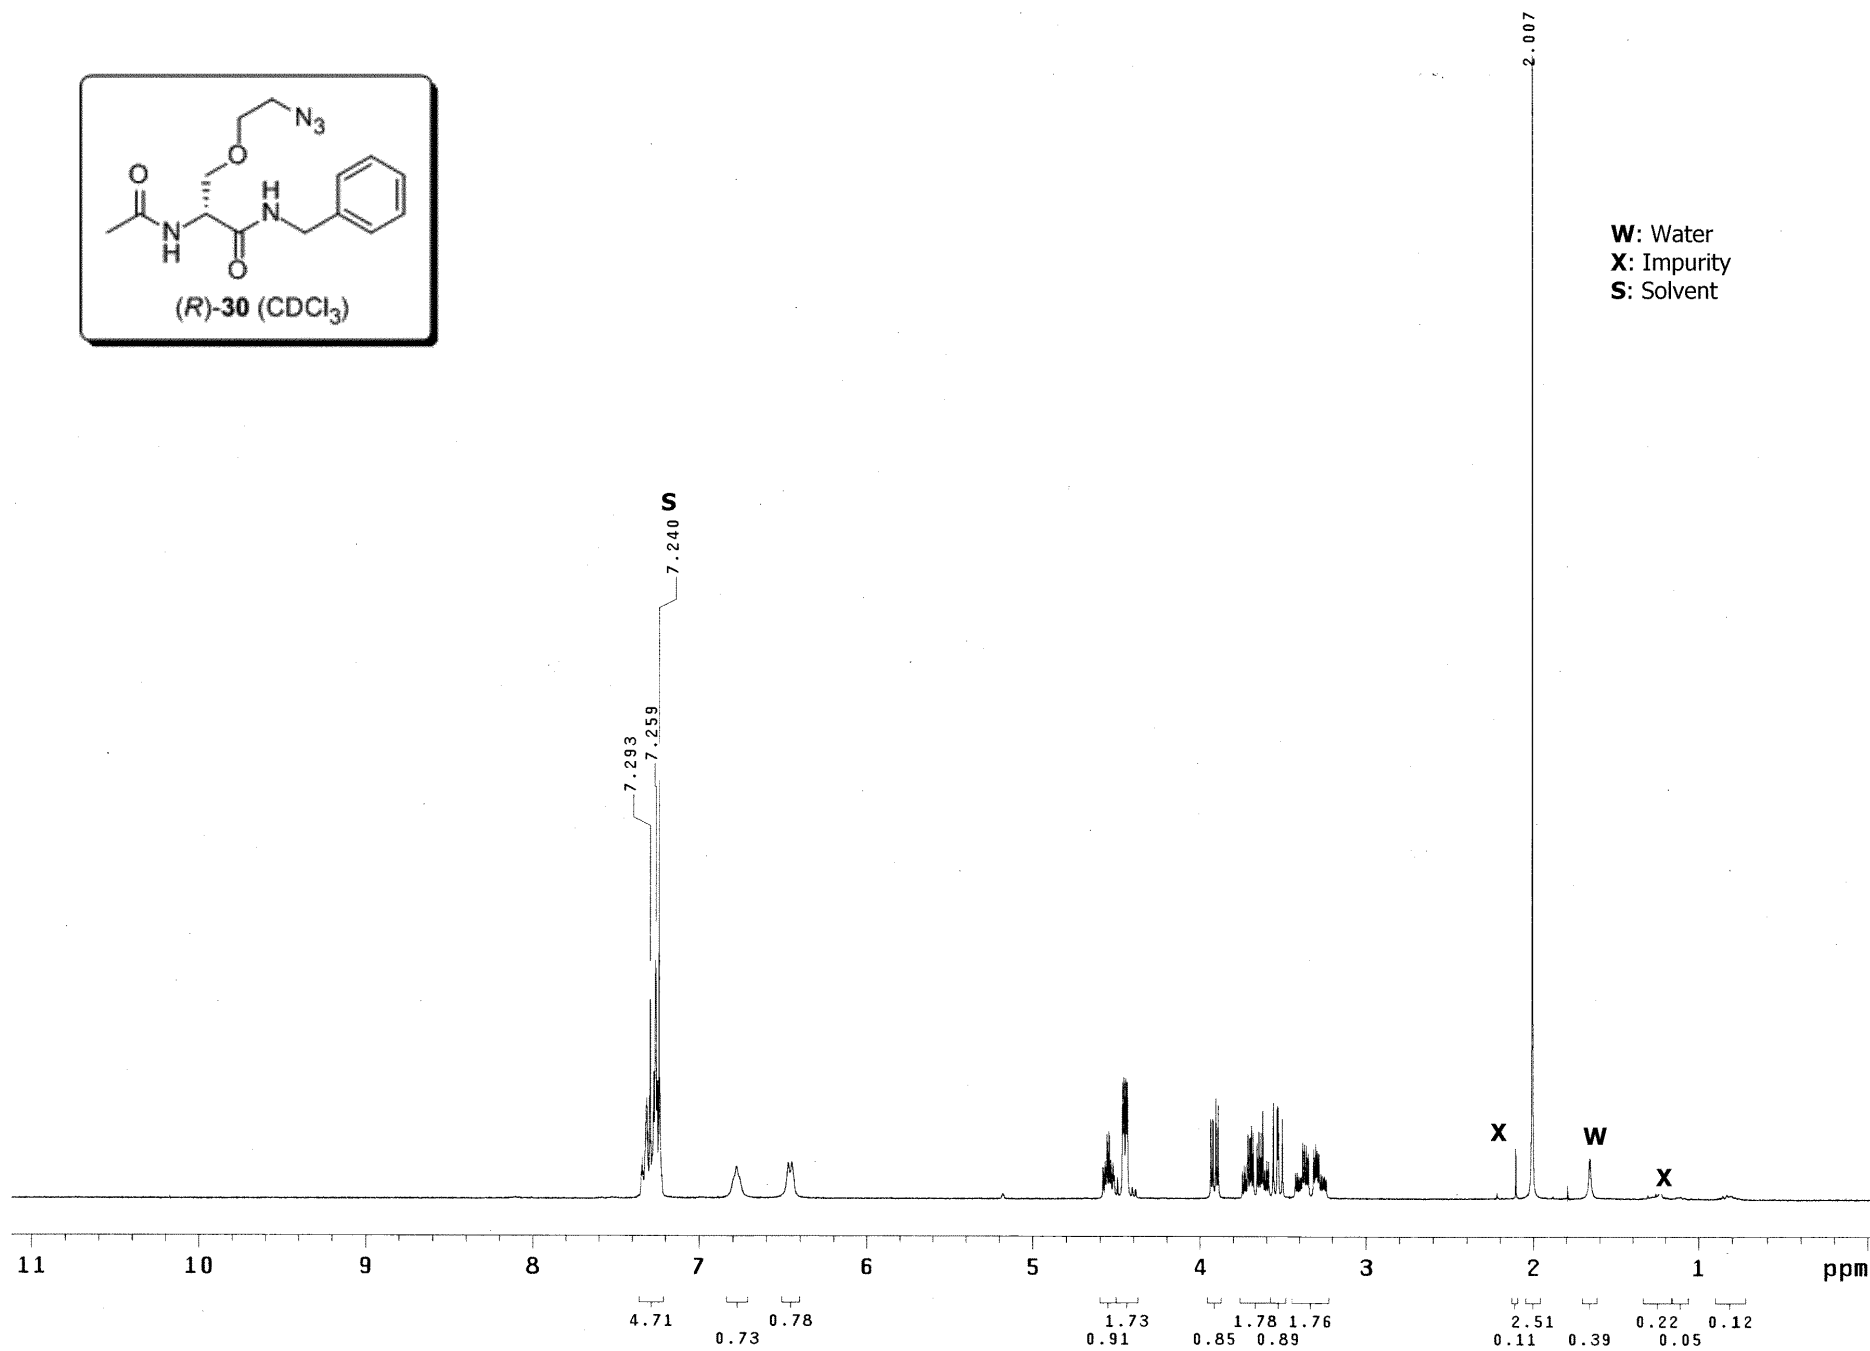

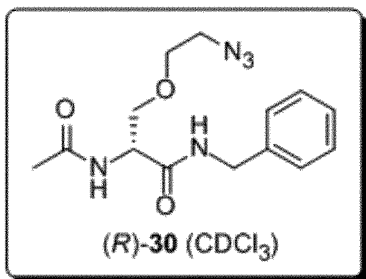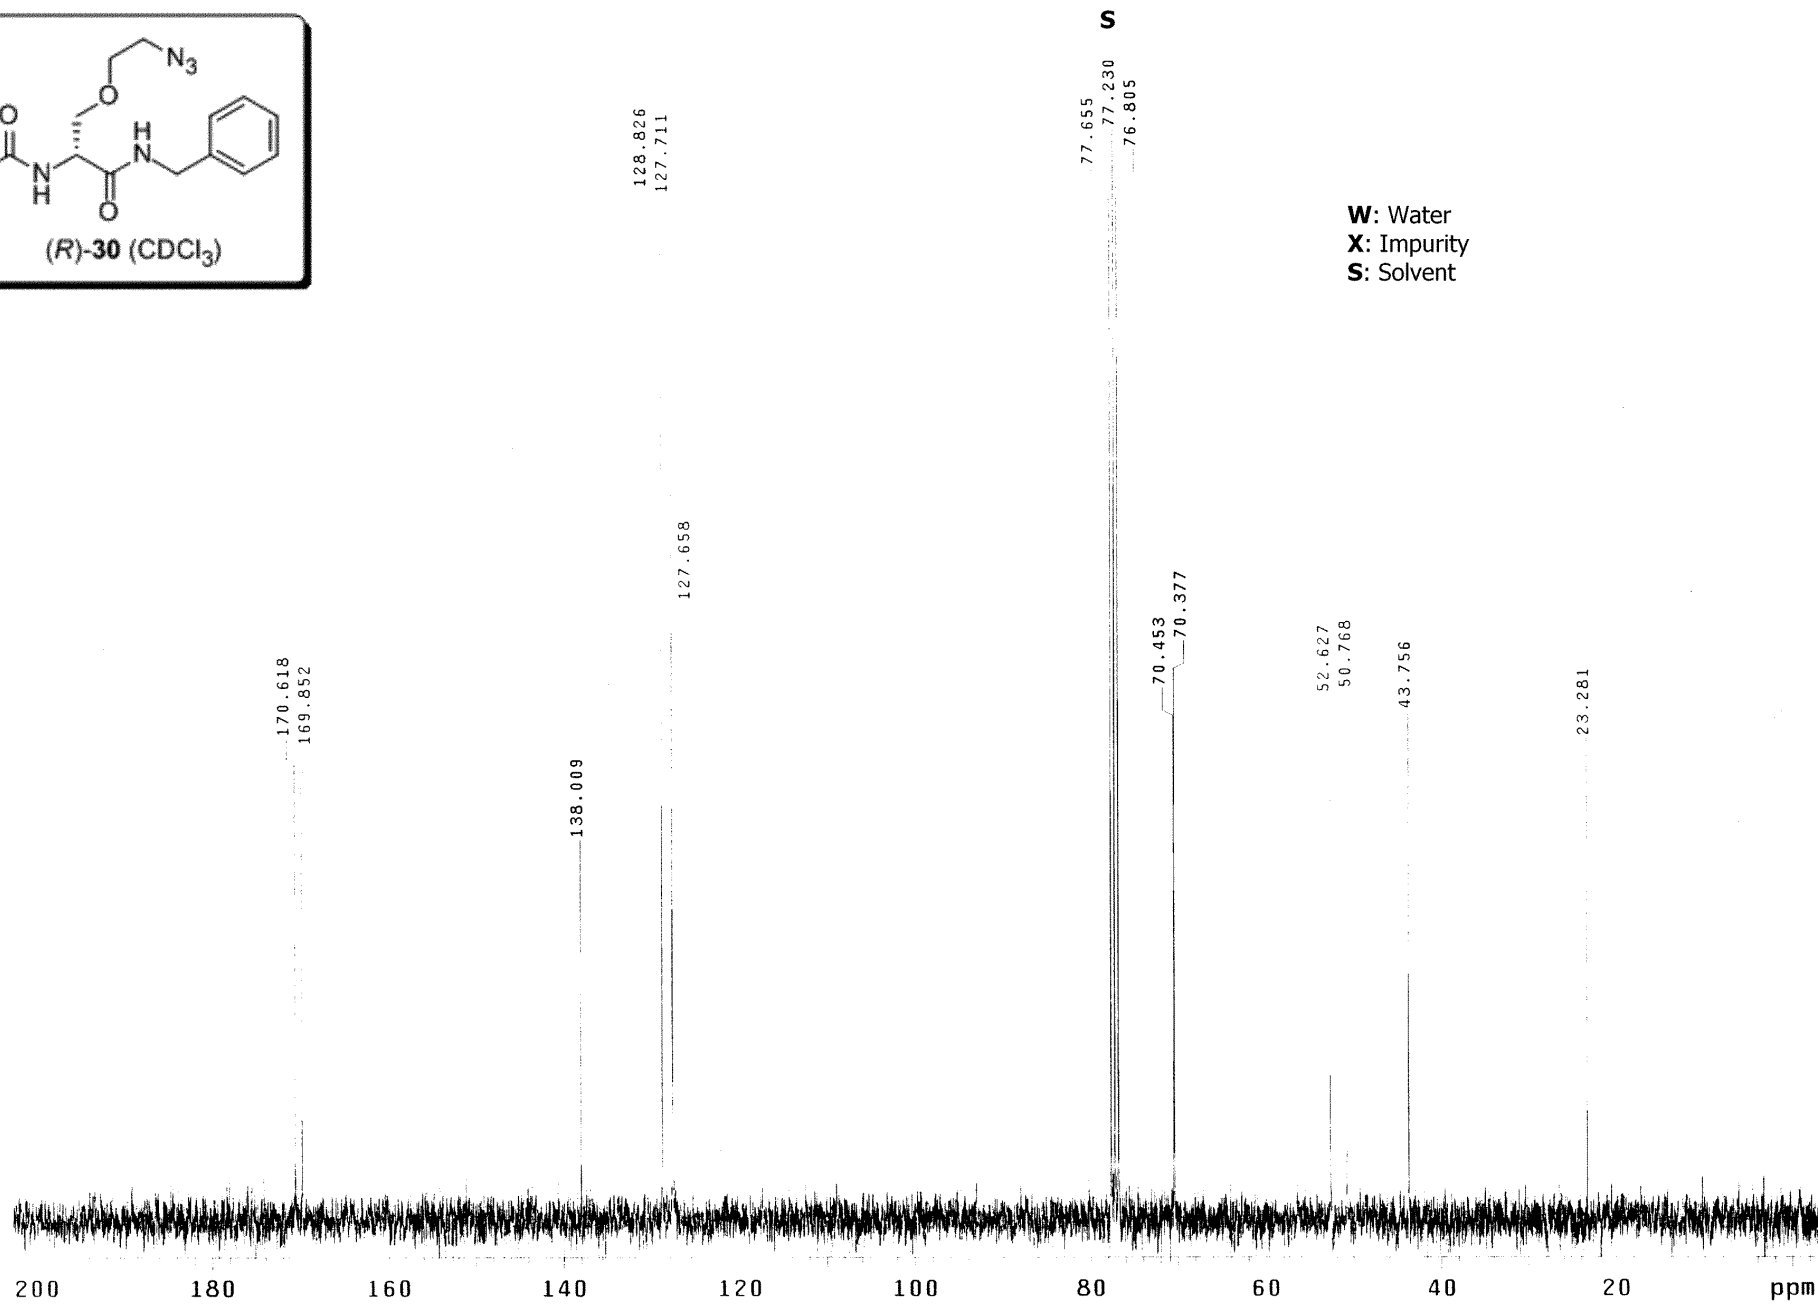

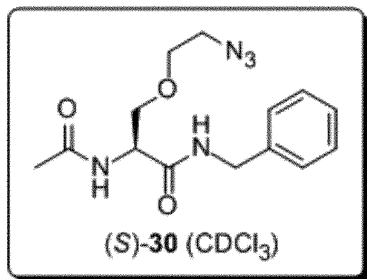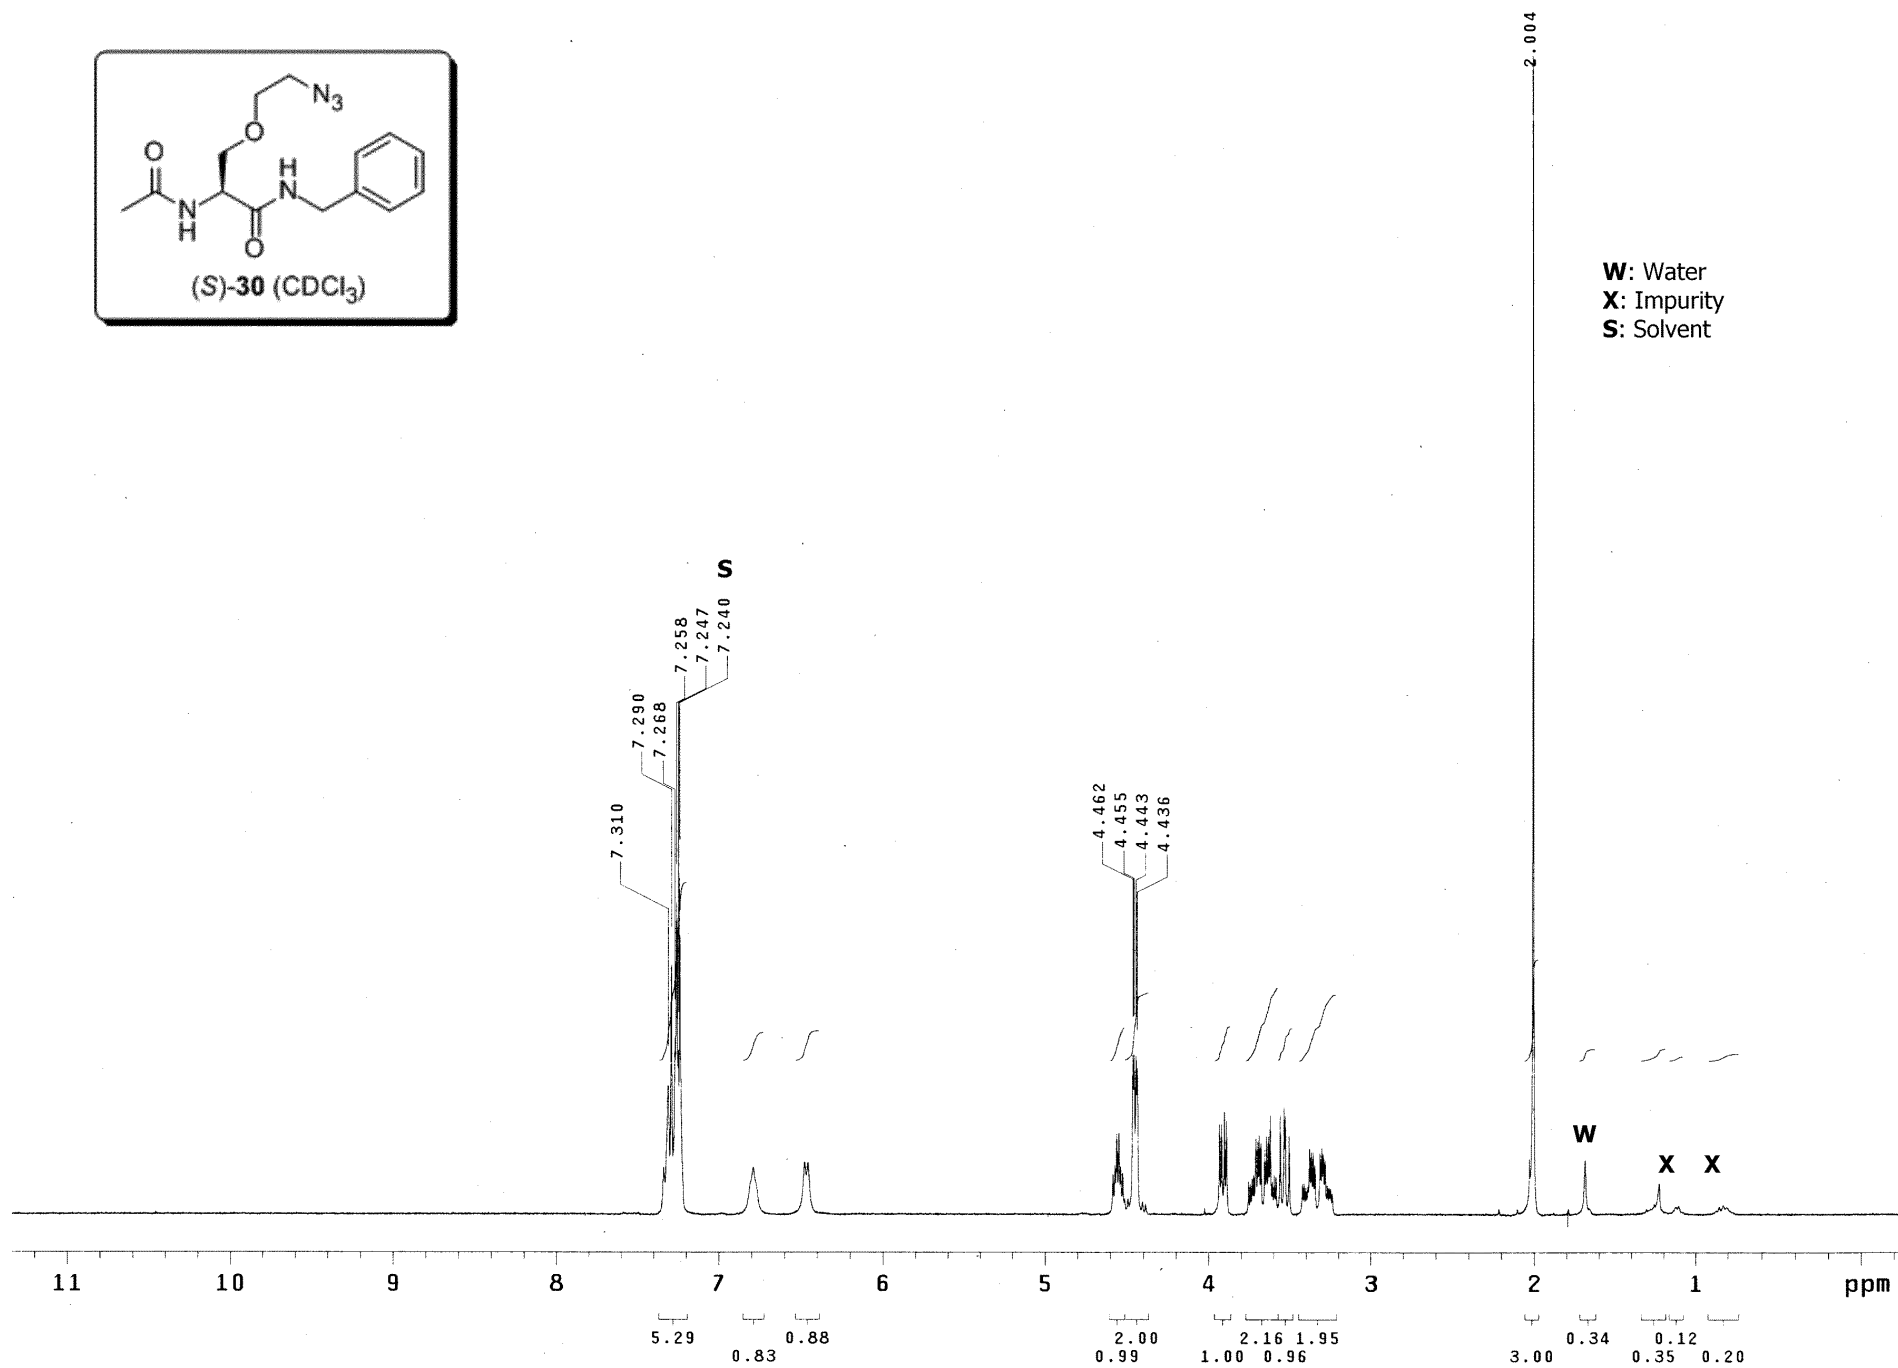

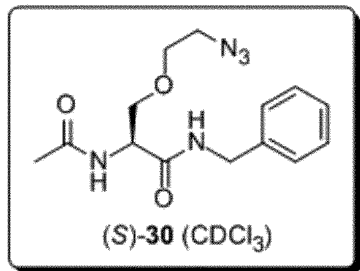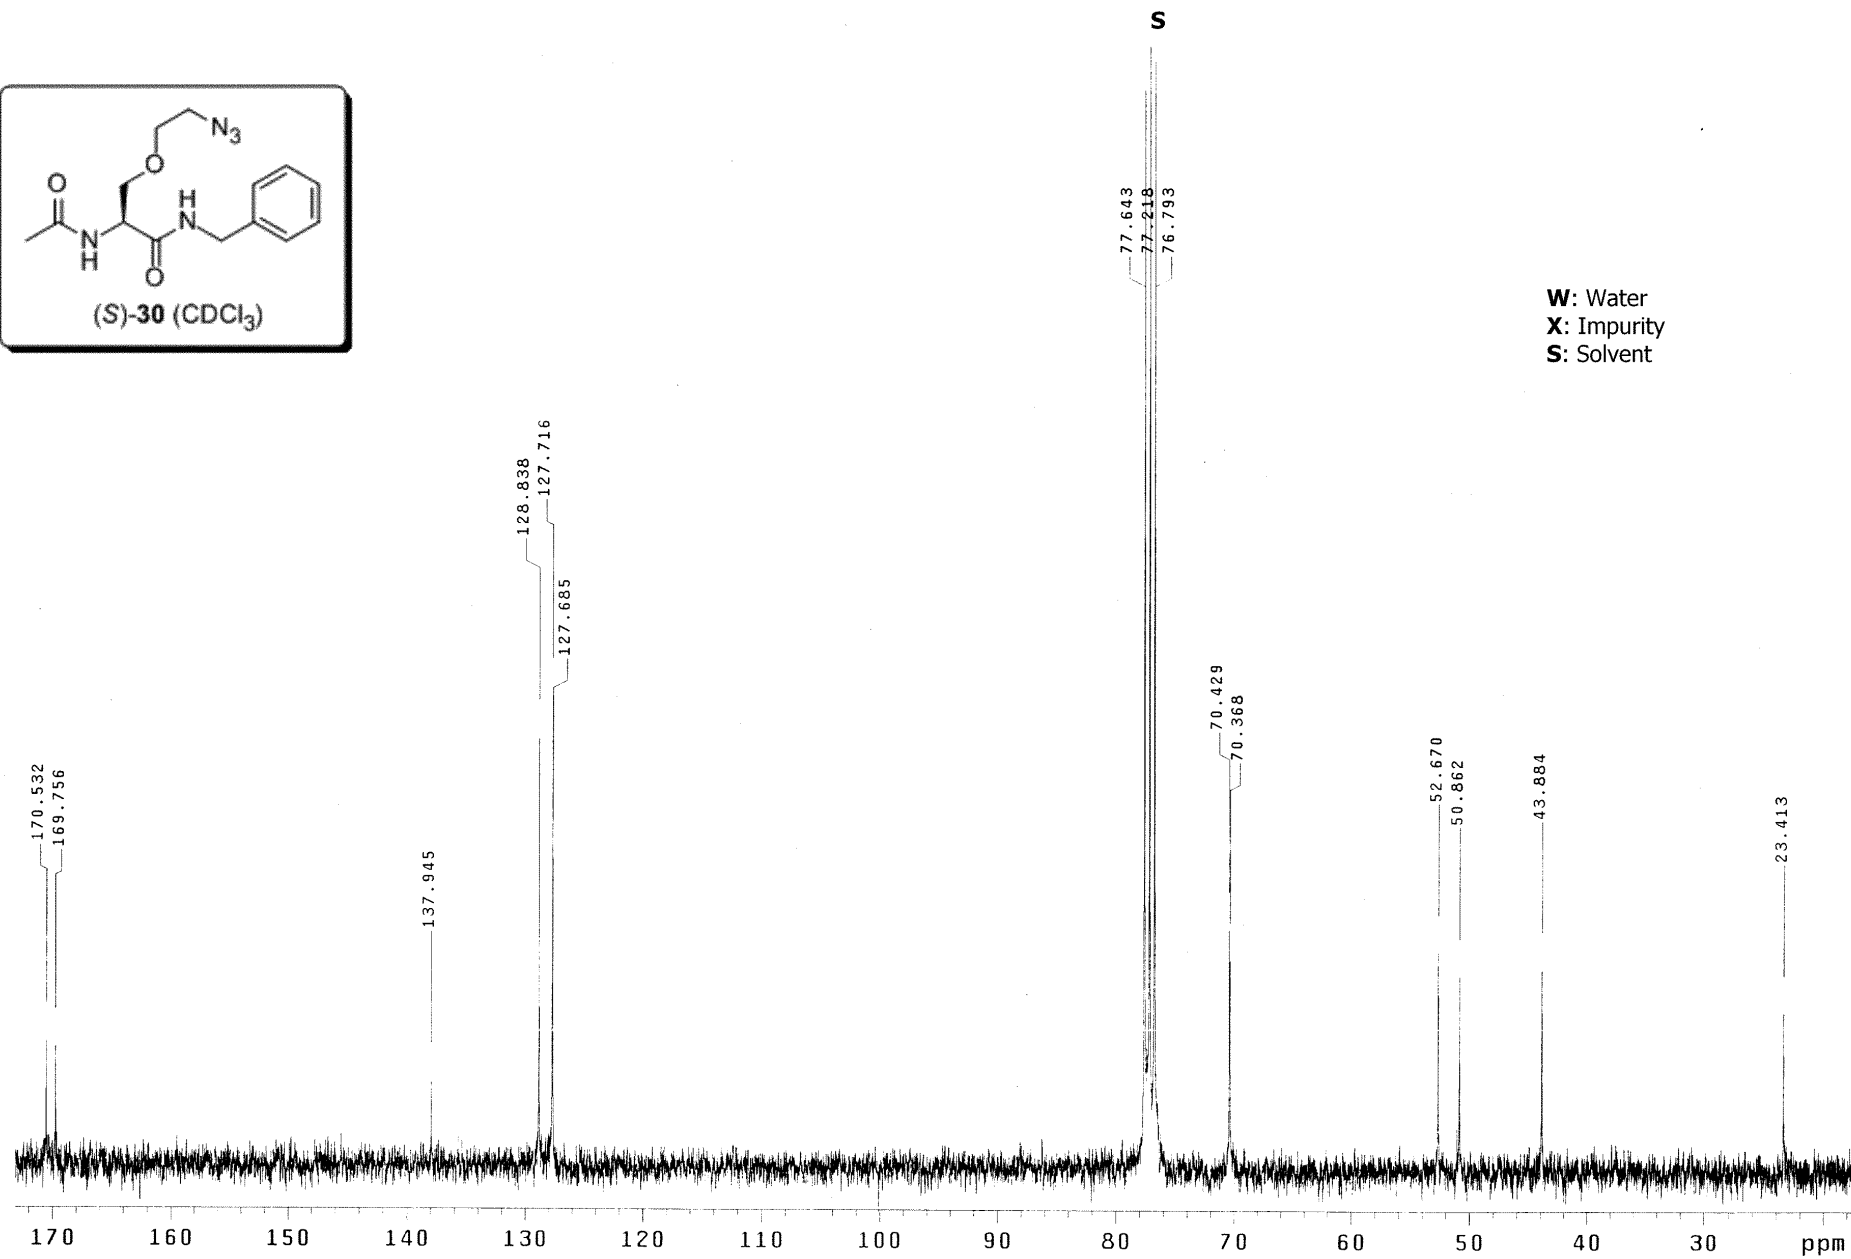

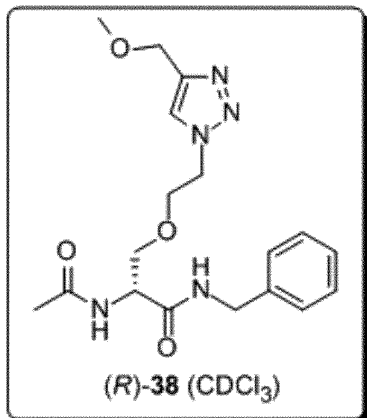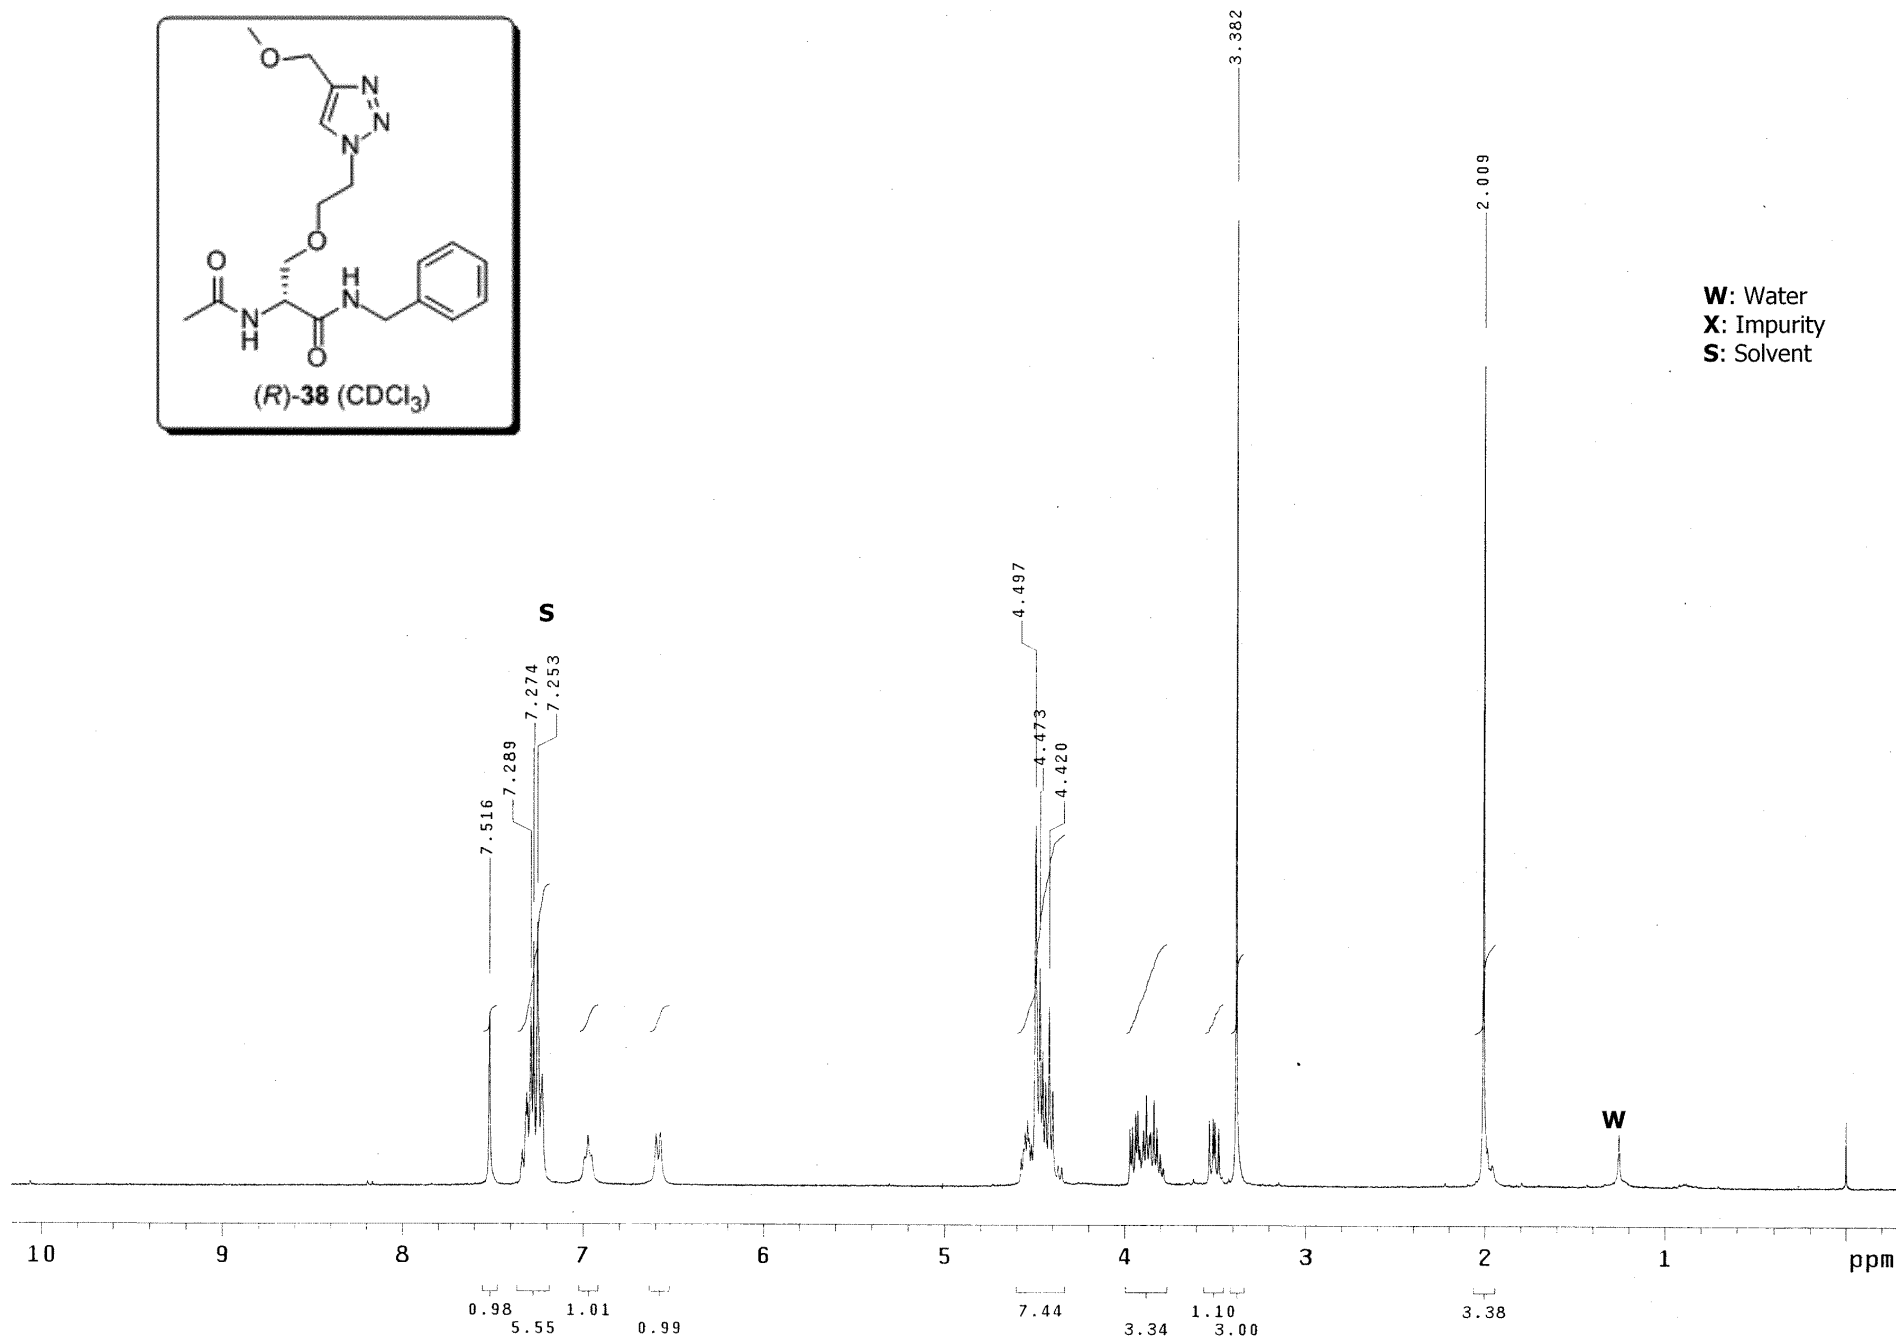

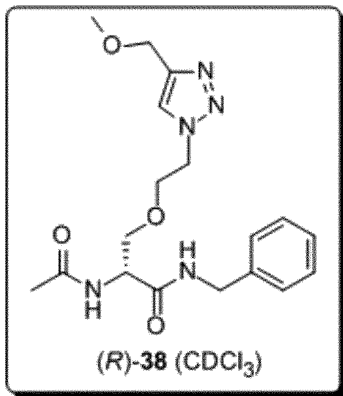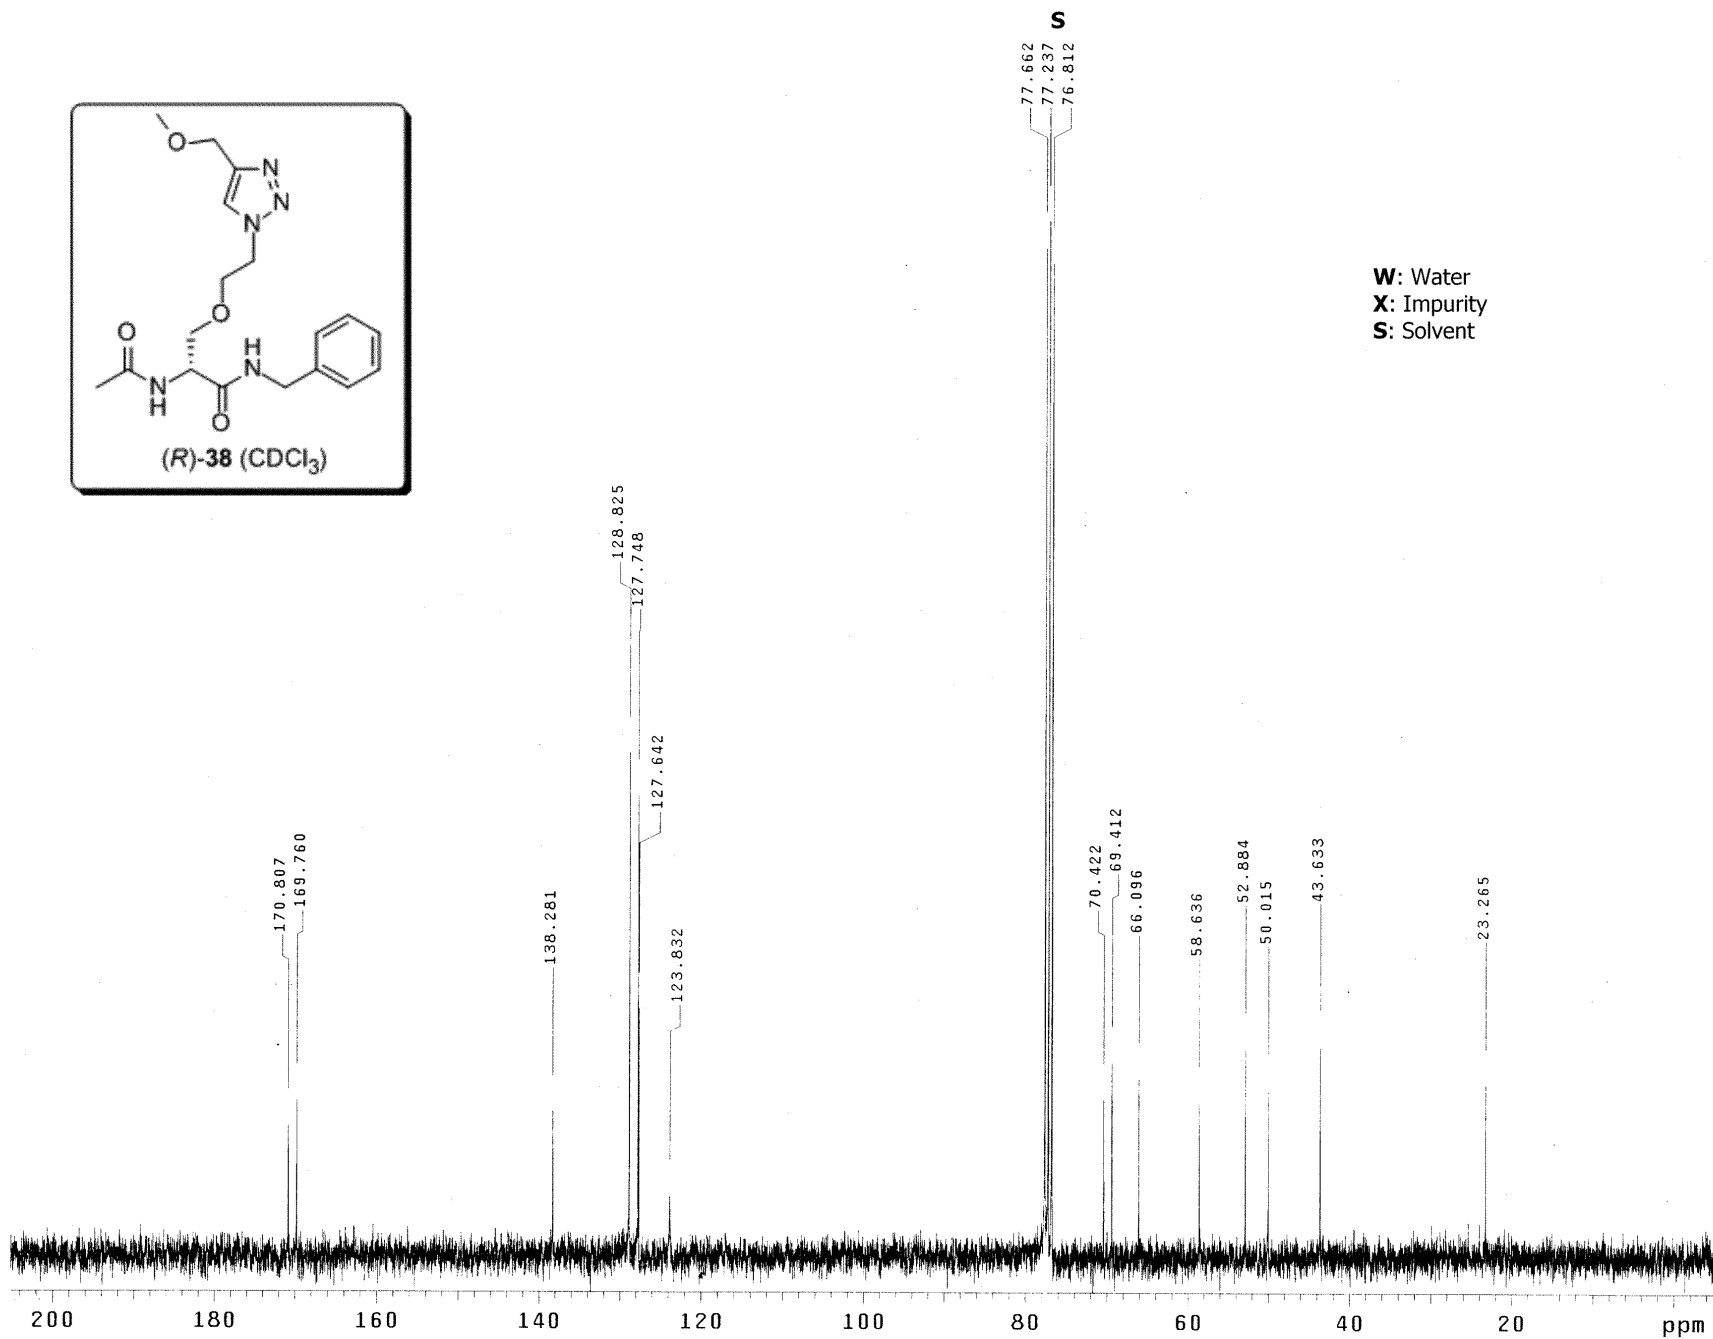

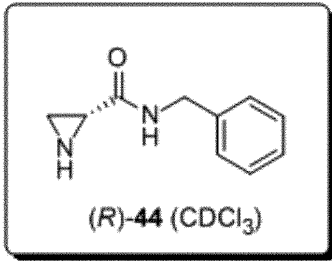

W: Water  
 X: Impurity  
 S: Solvent

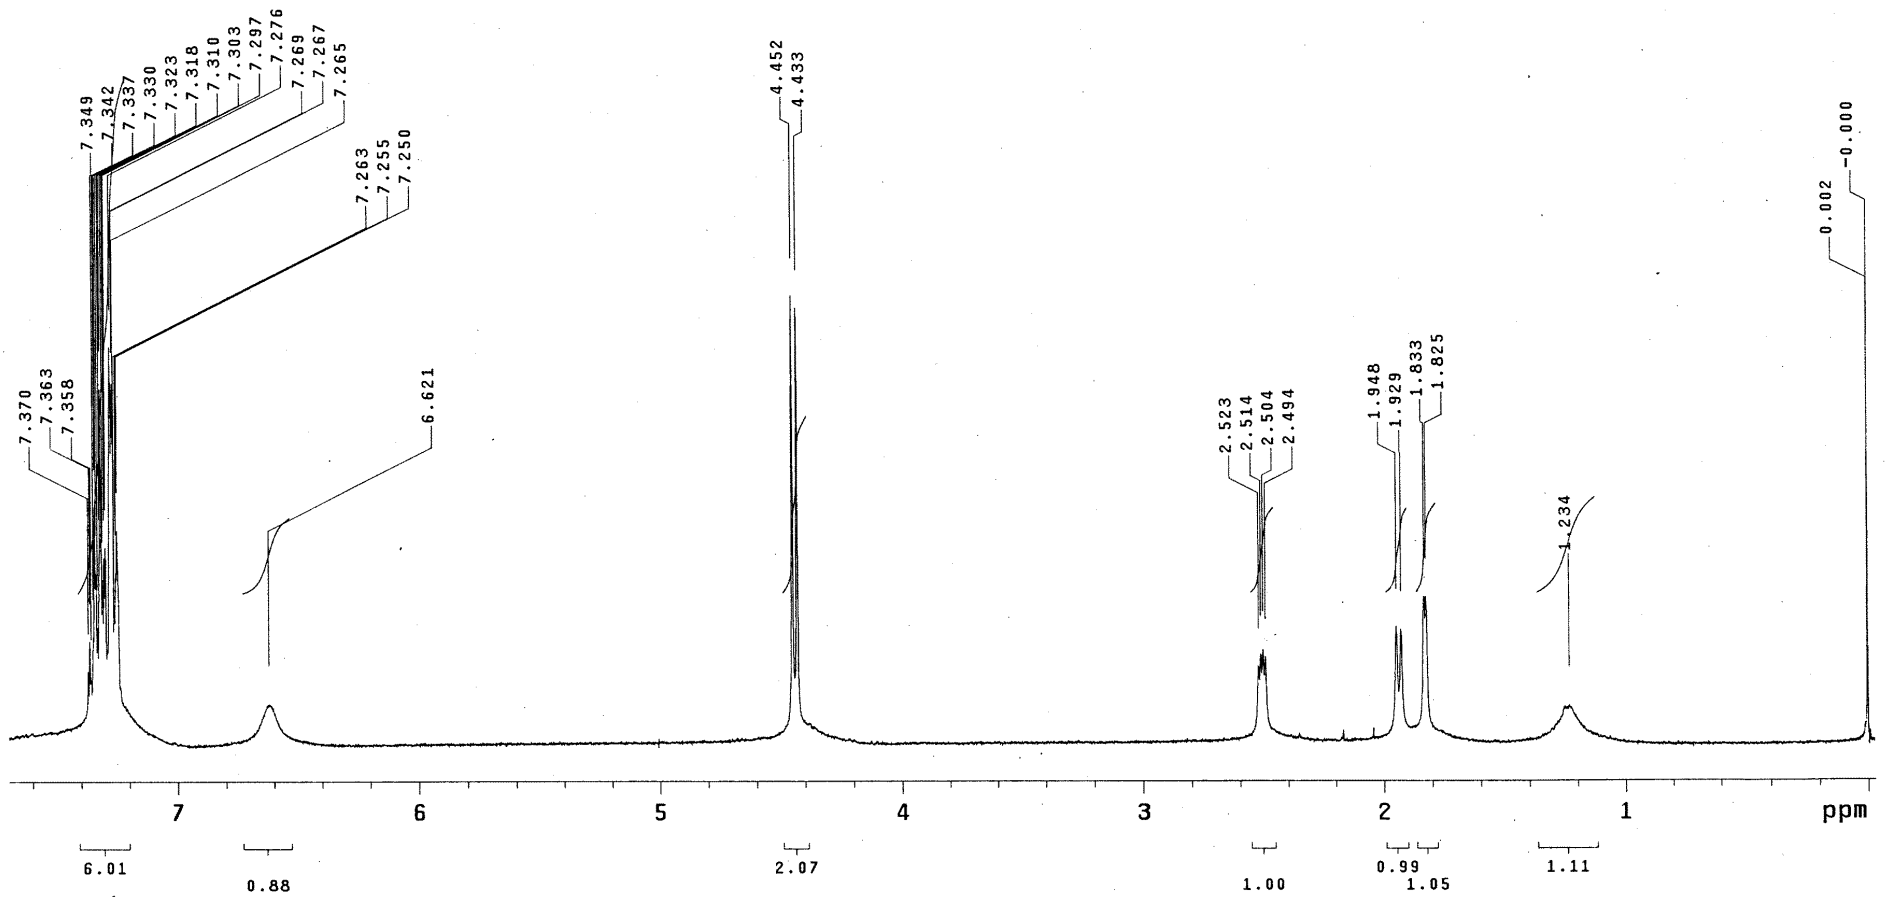



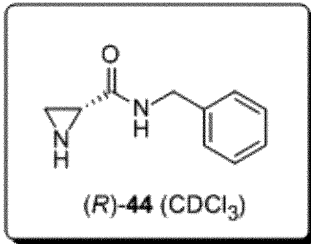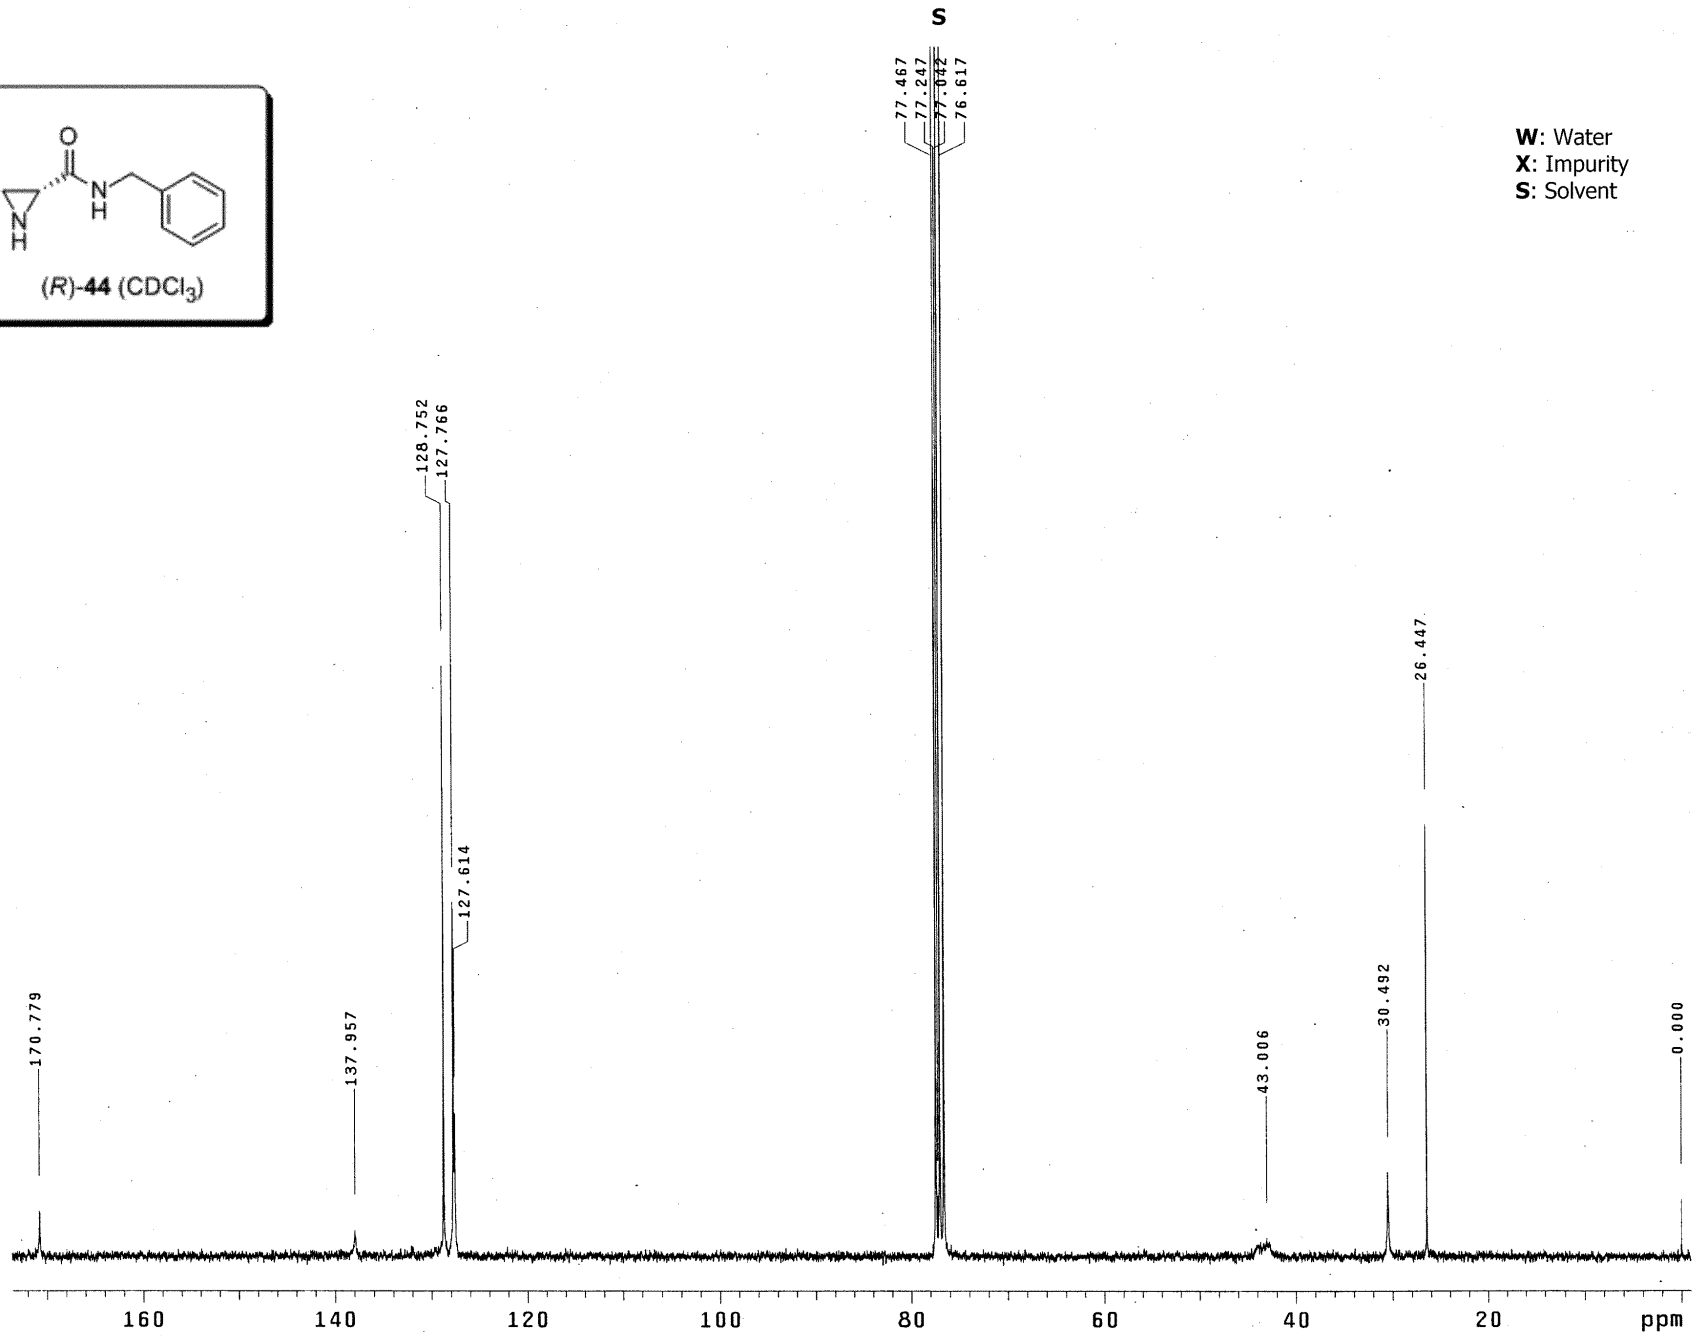

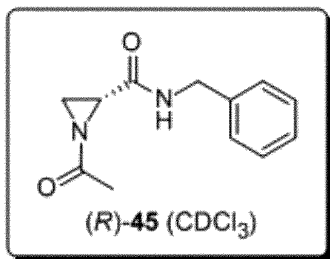

W: Water  
 X: Impurity  
 S: Solvent

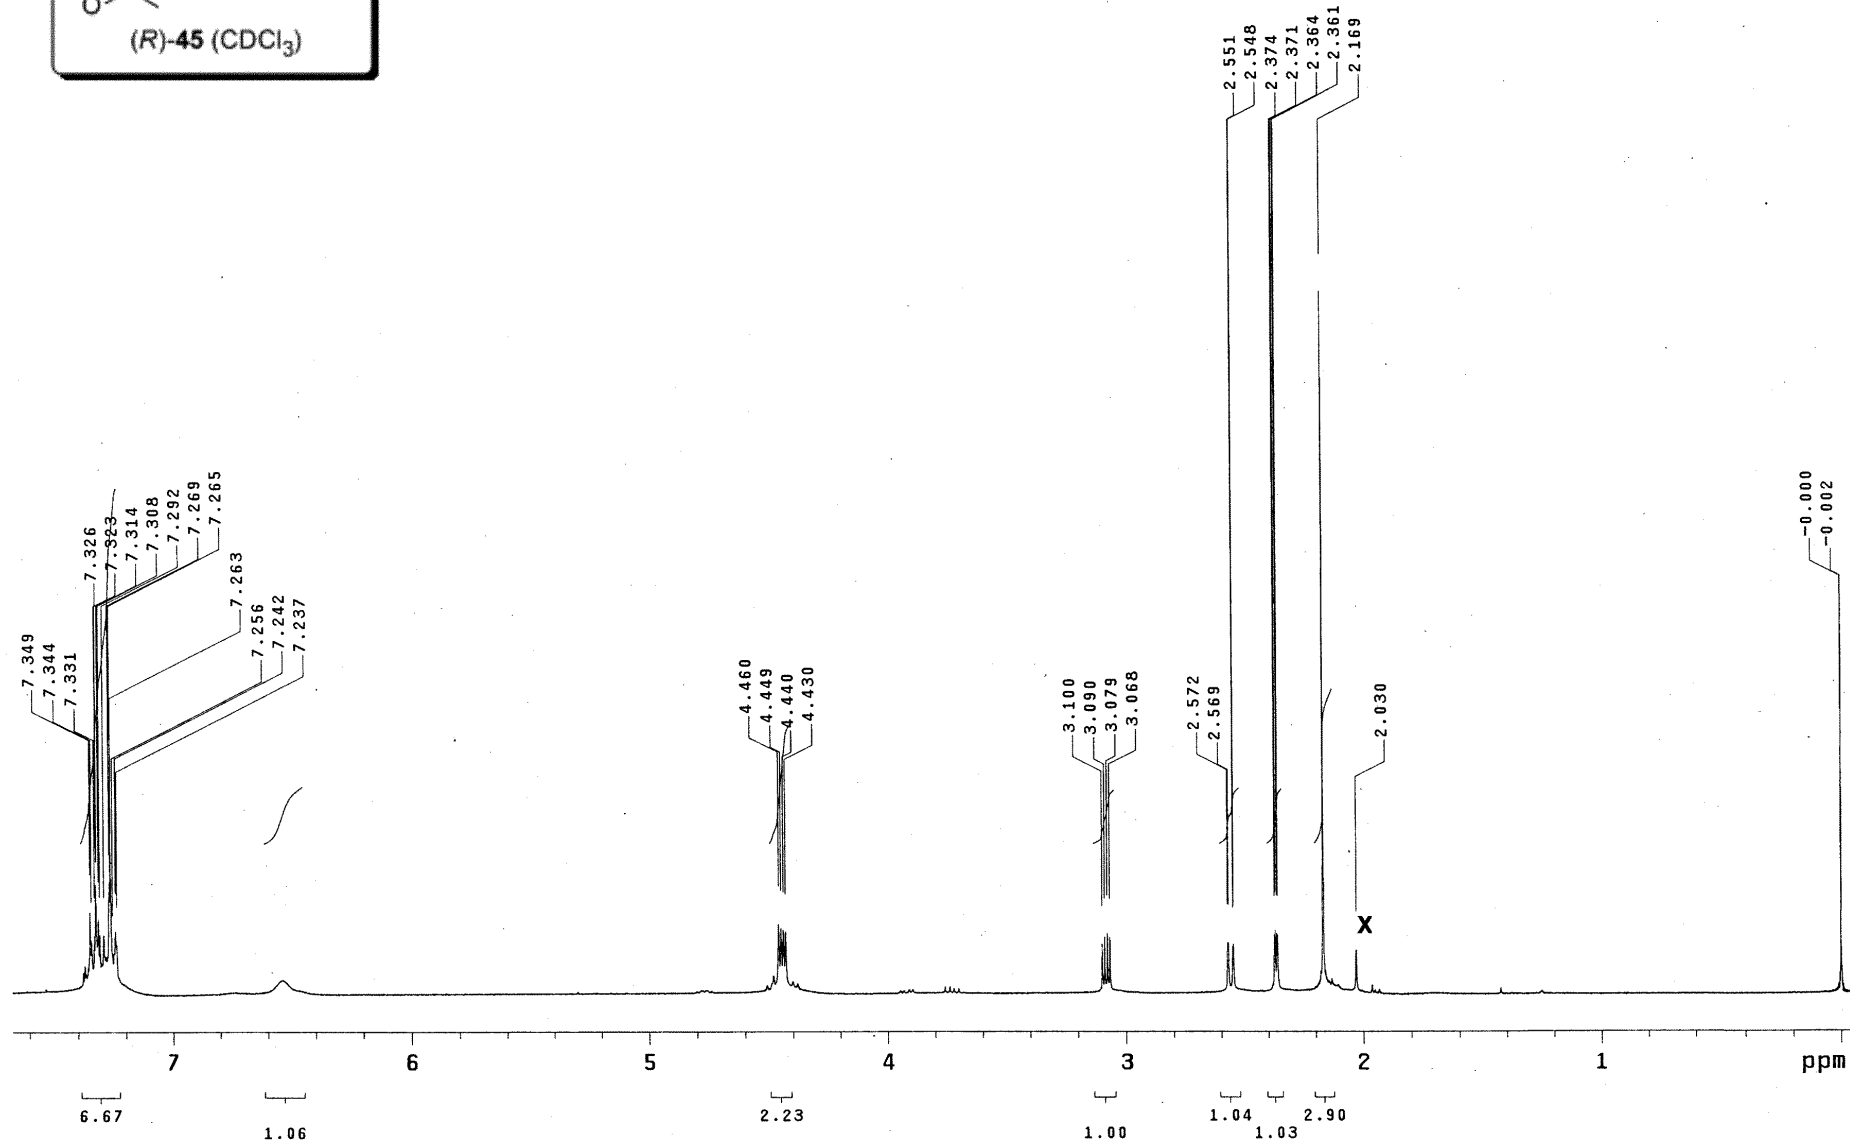

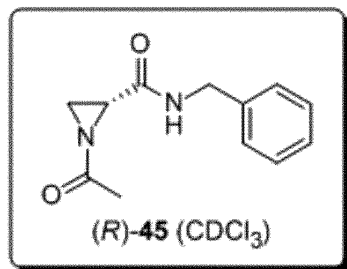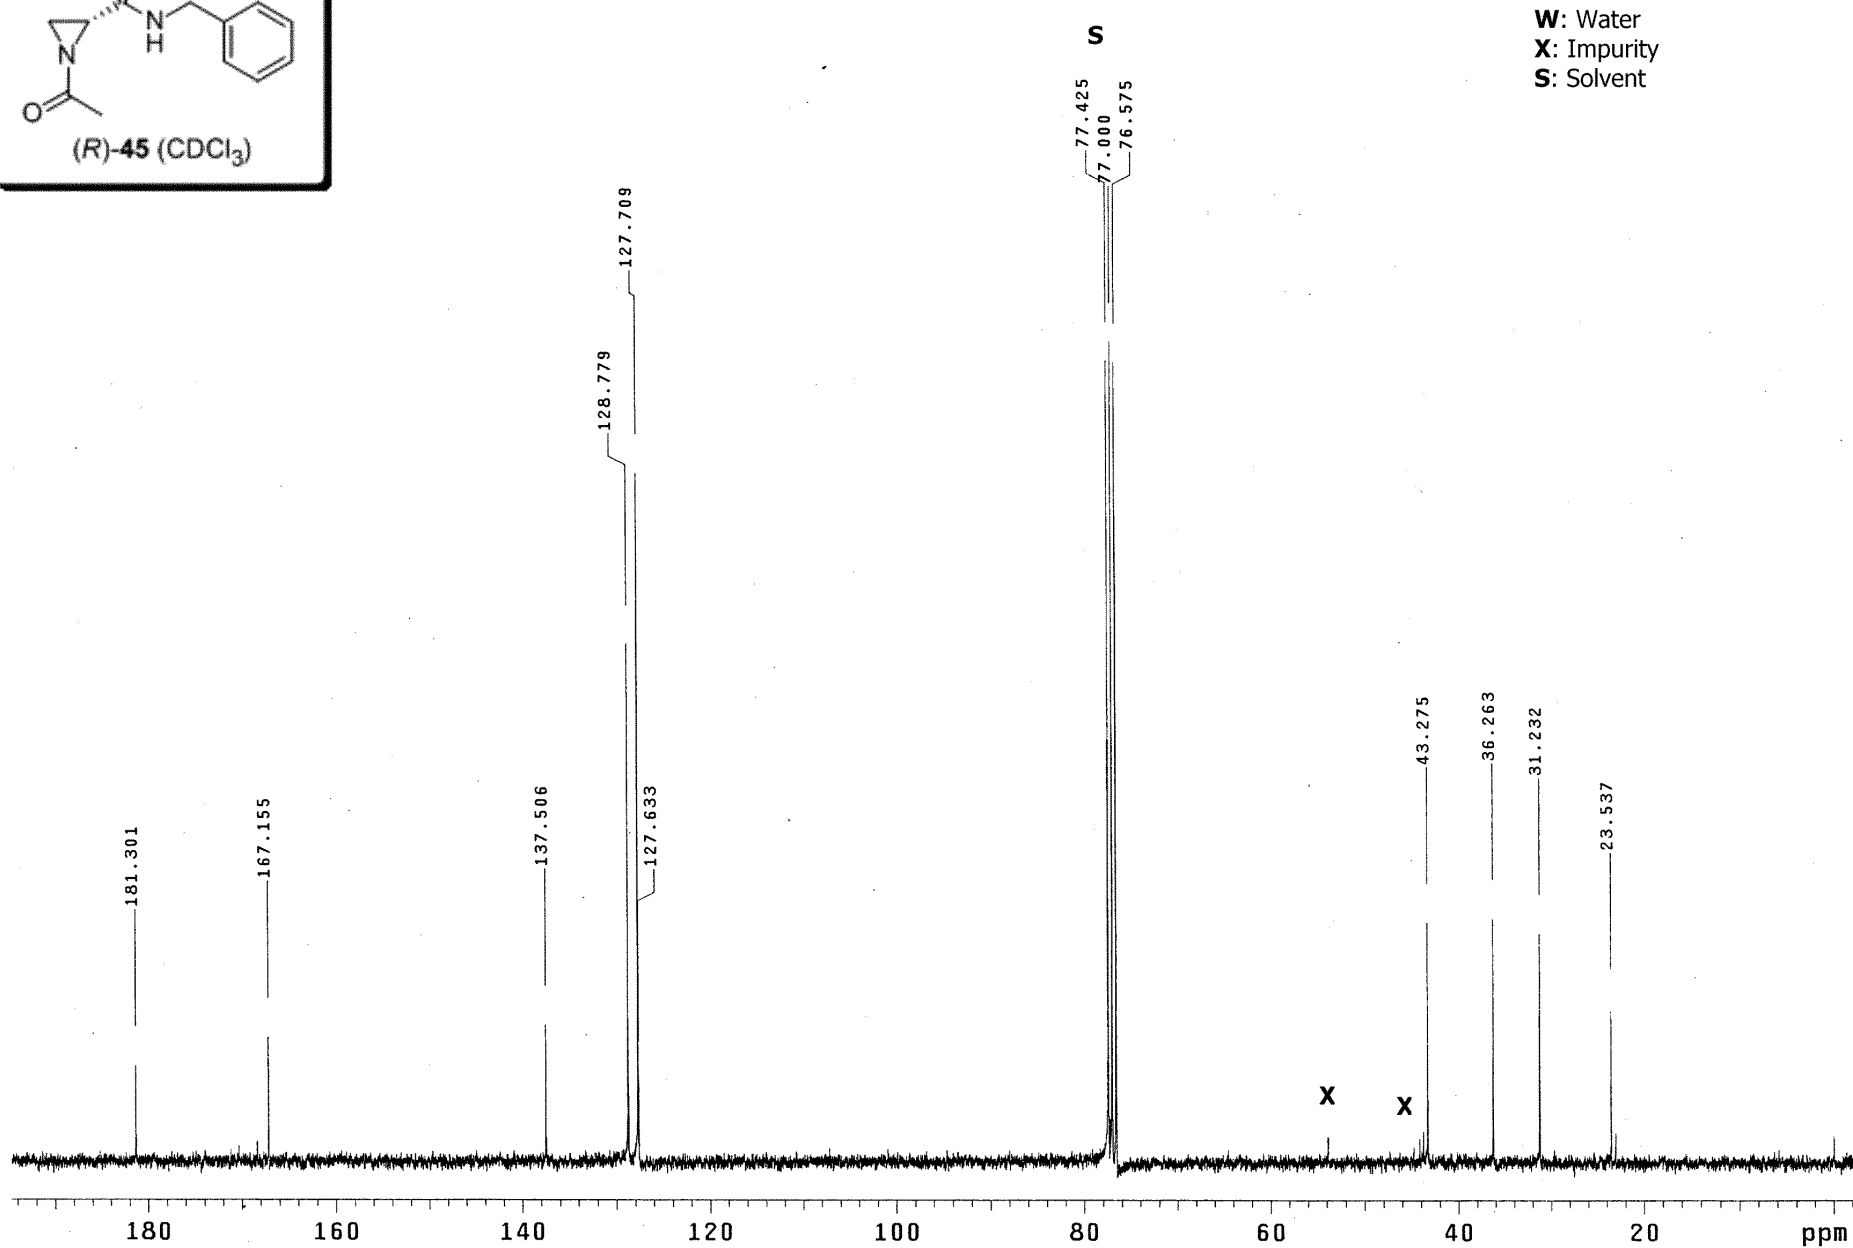

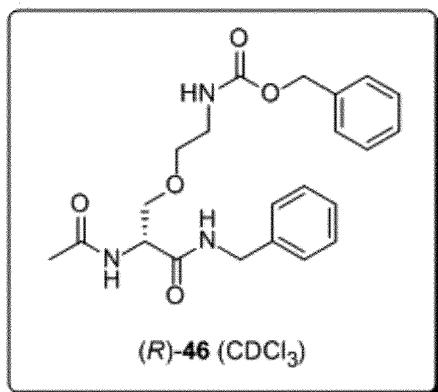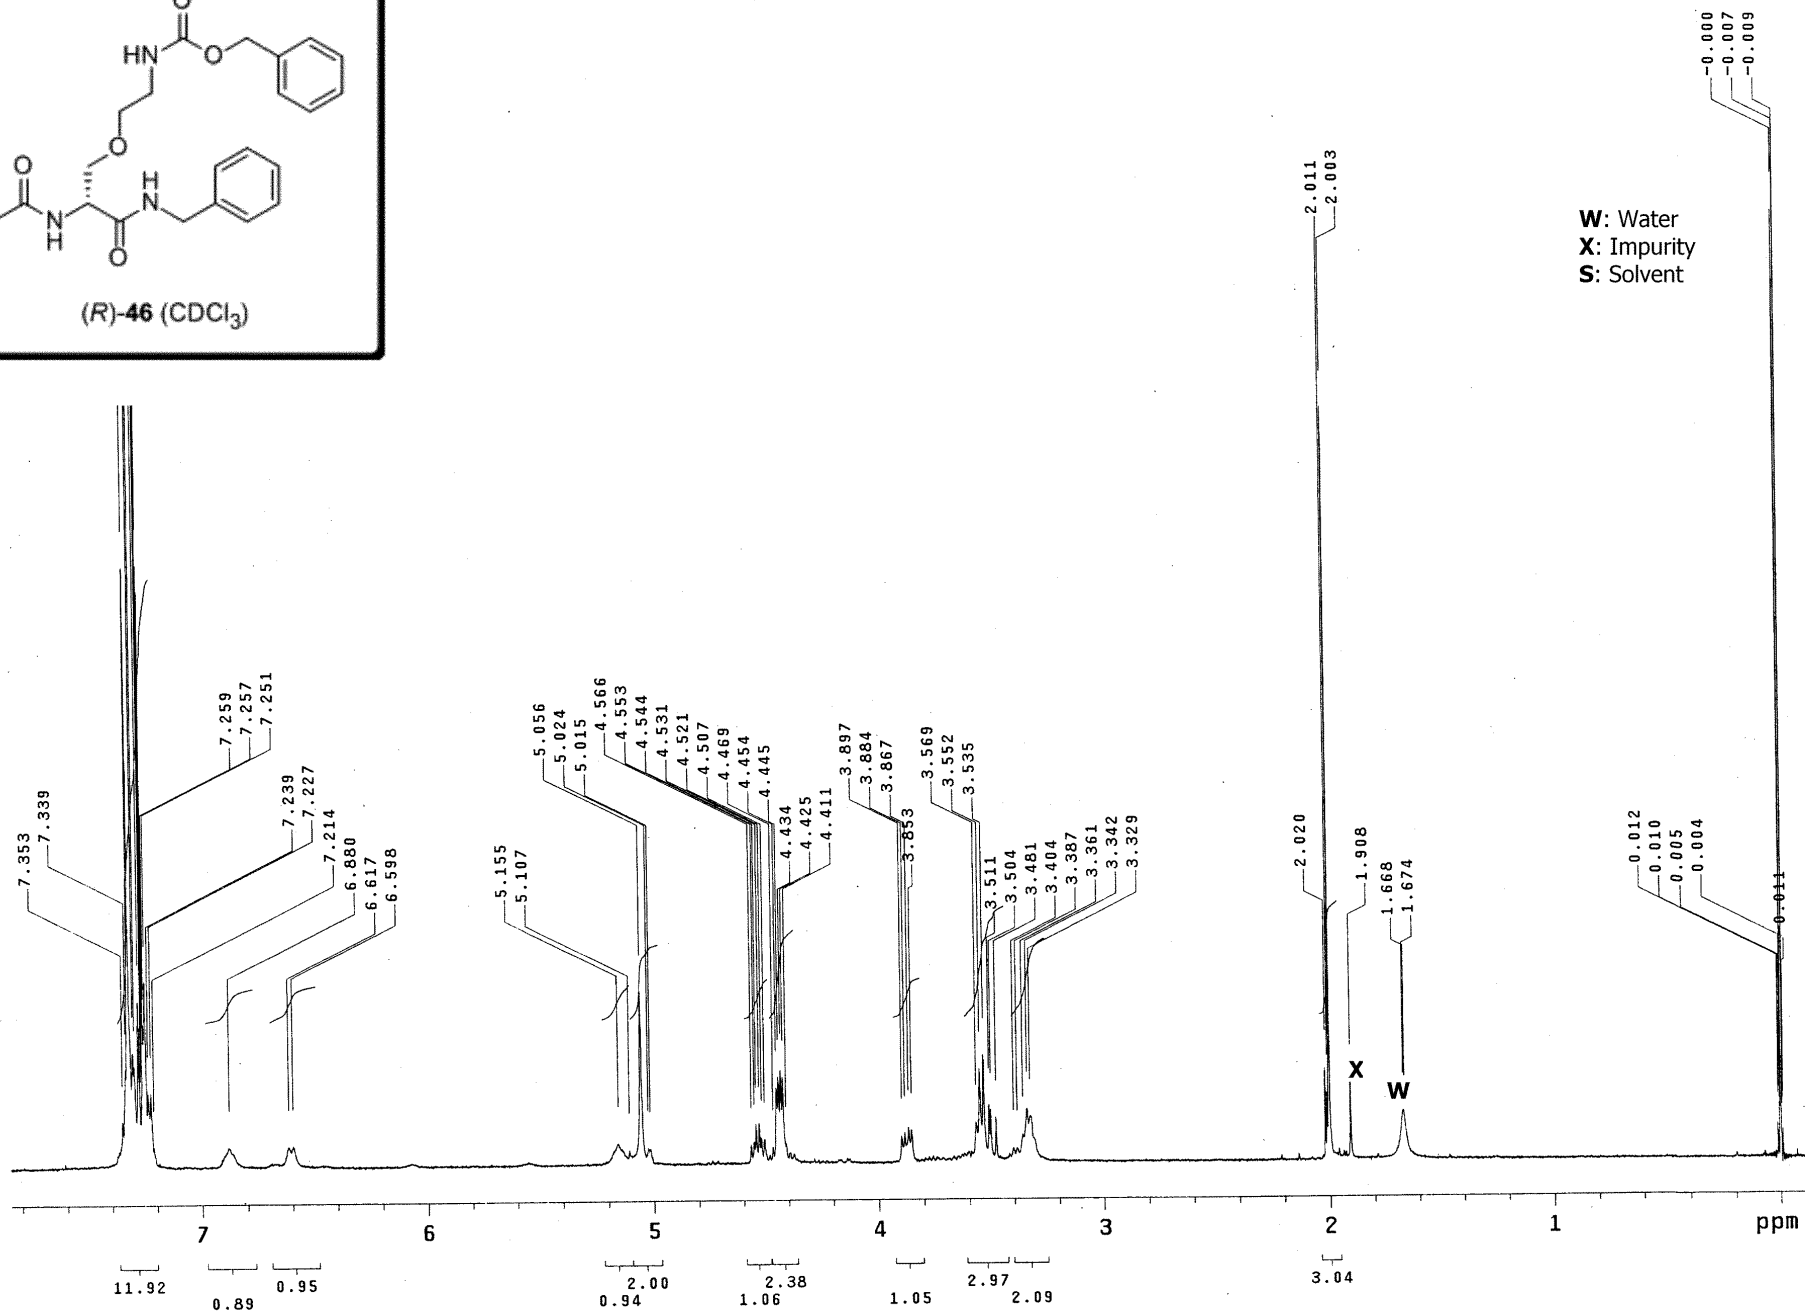

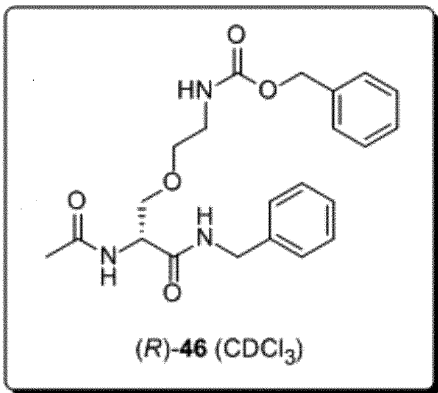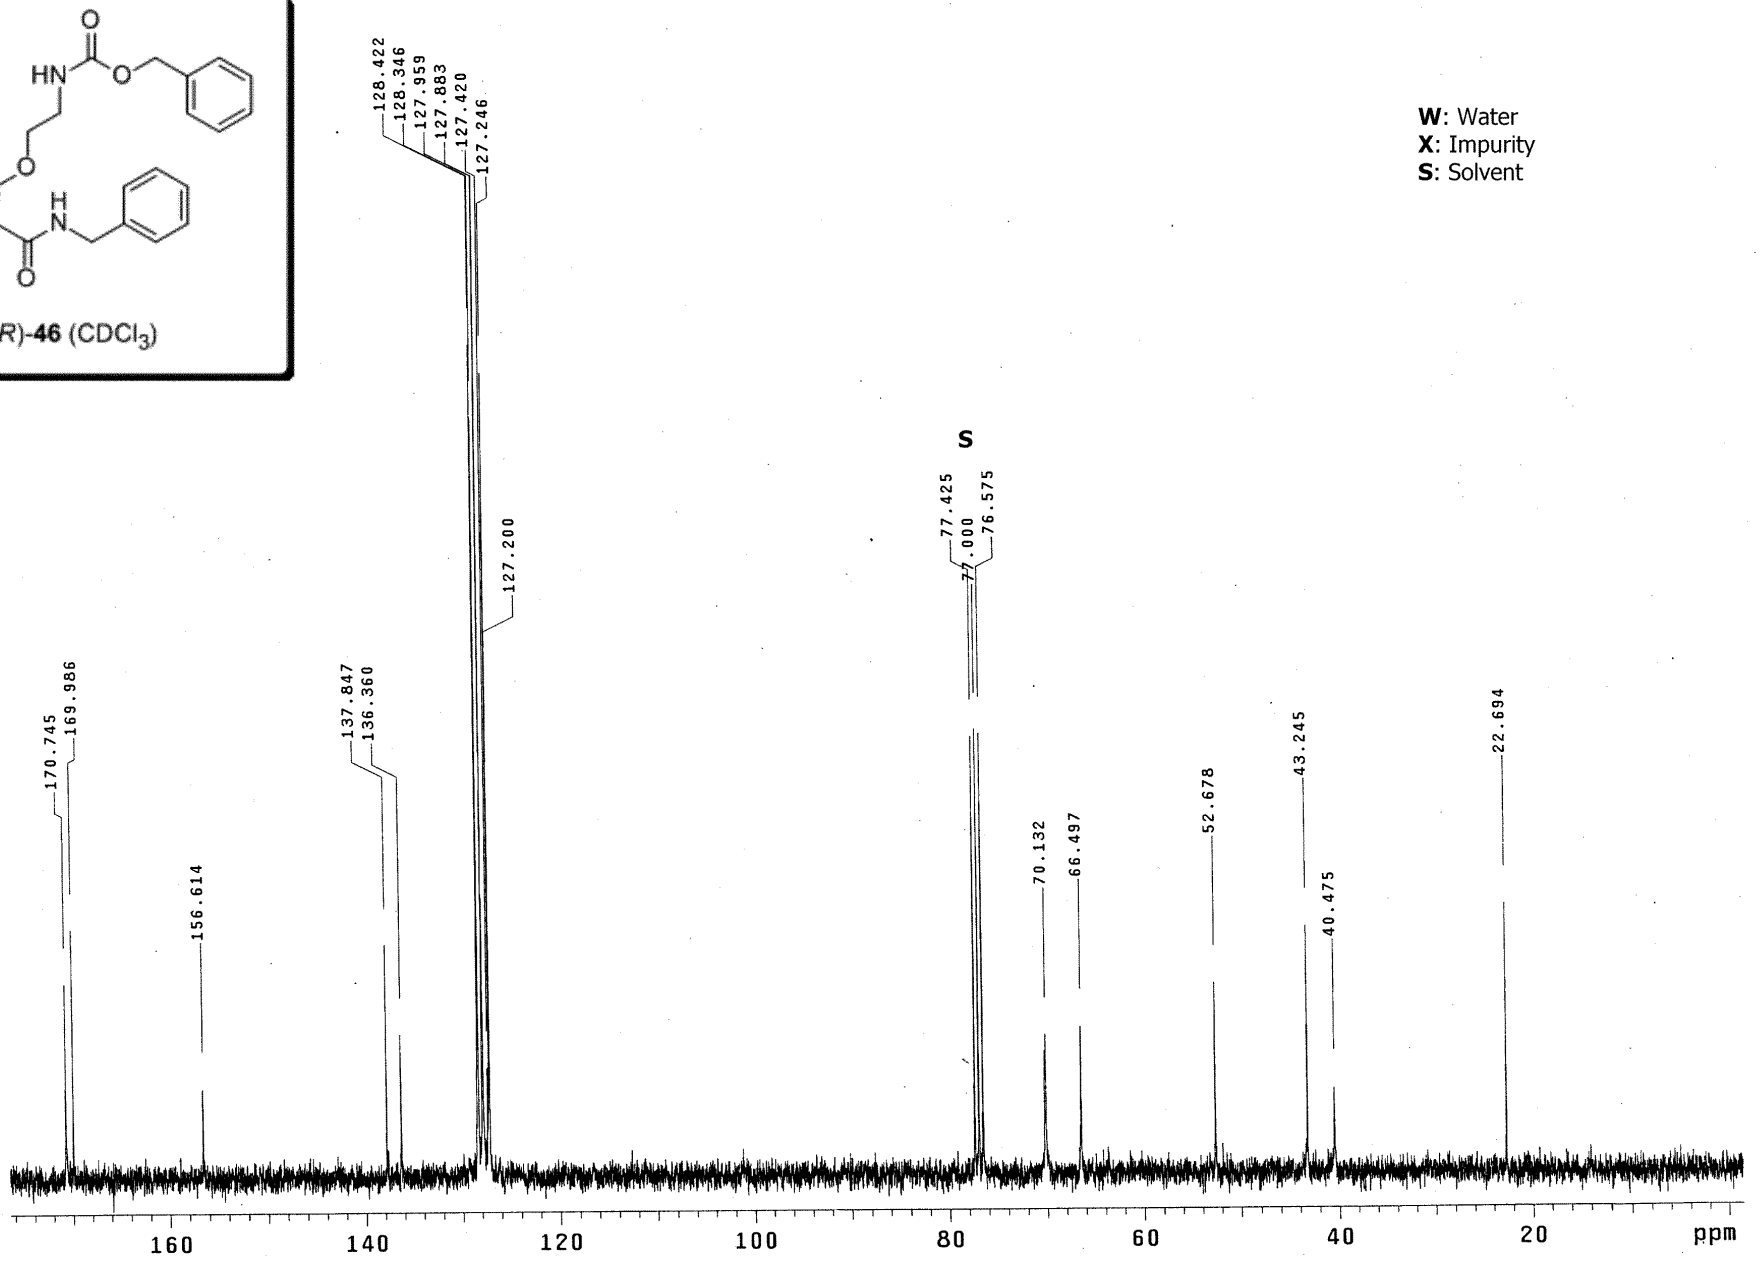

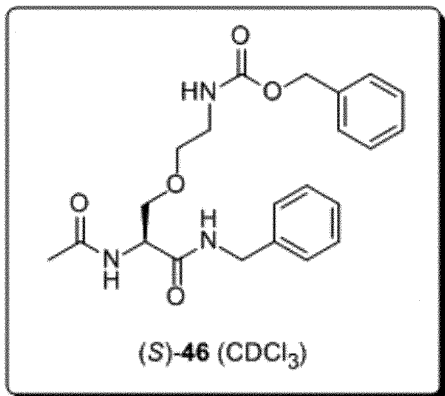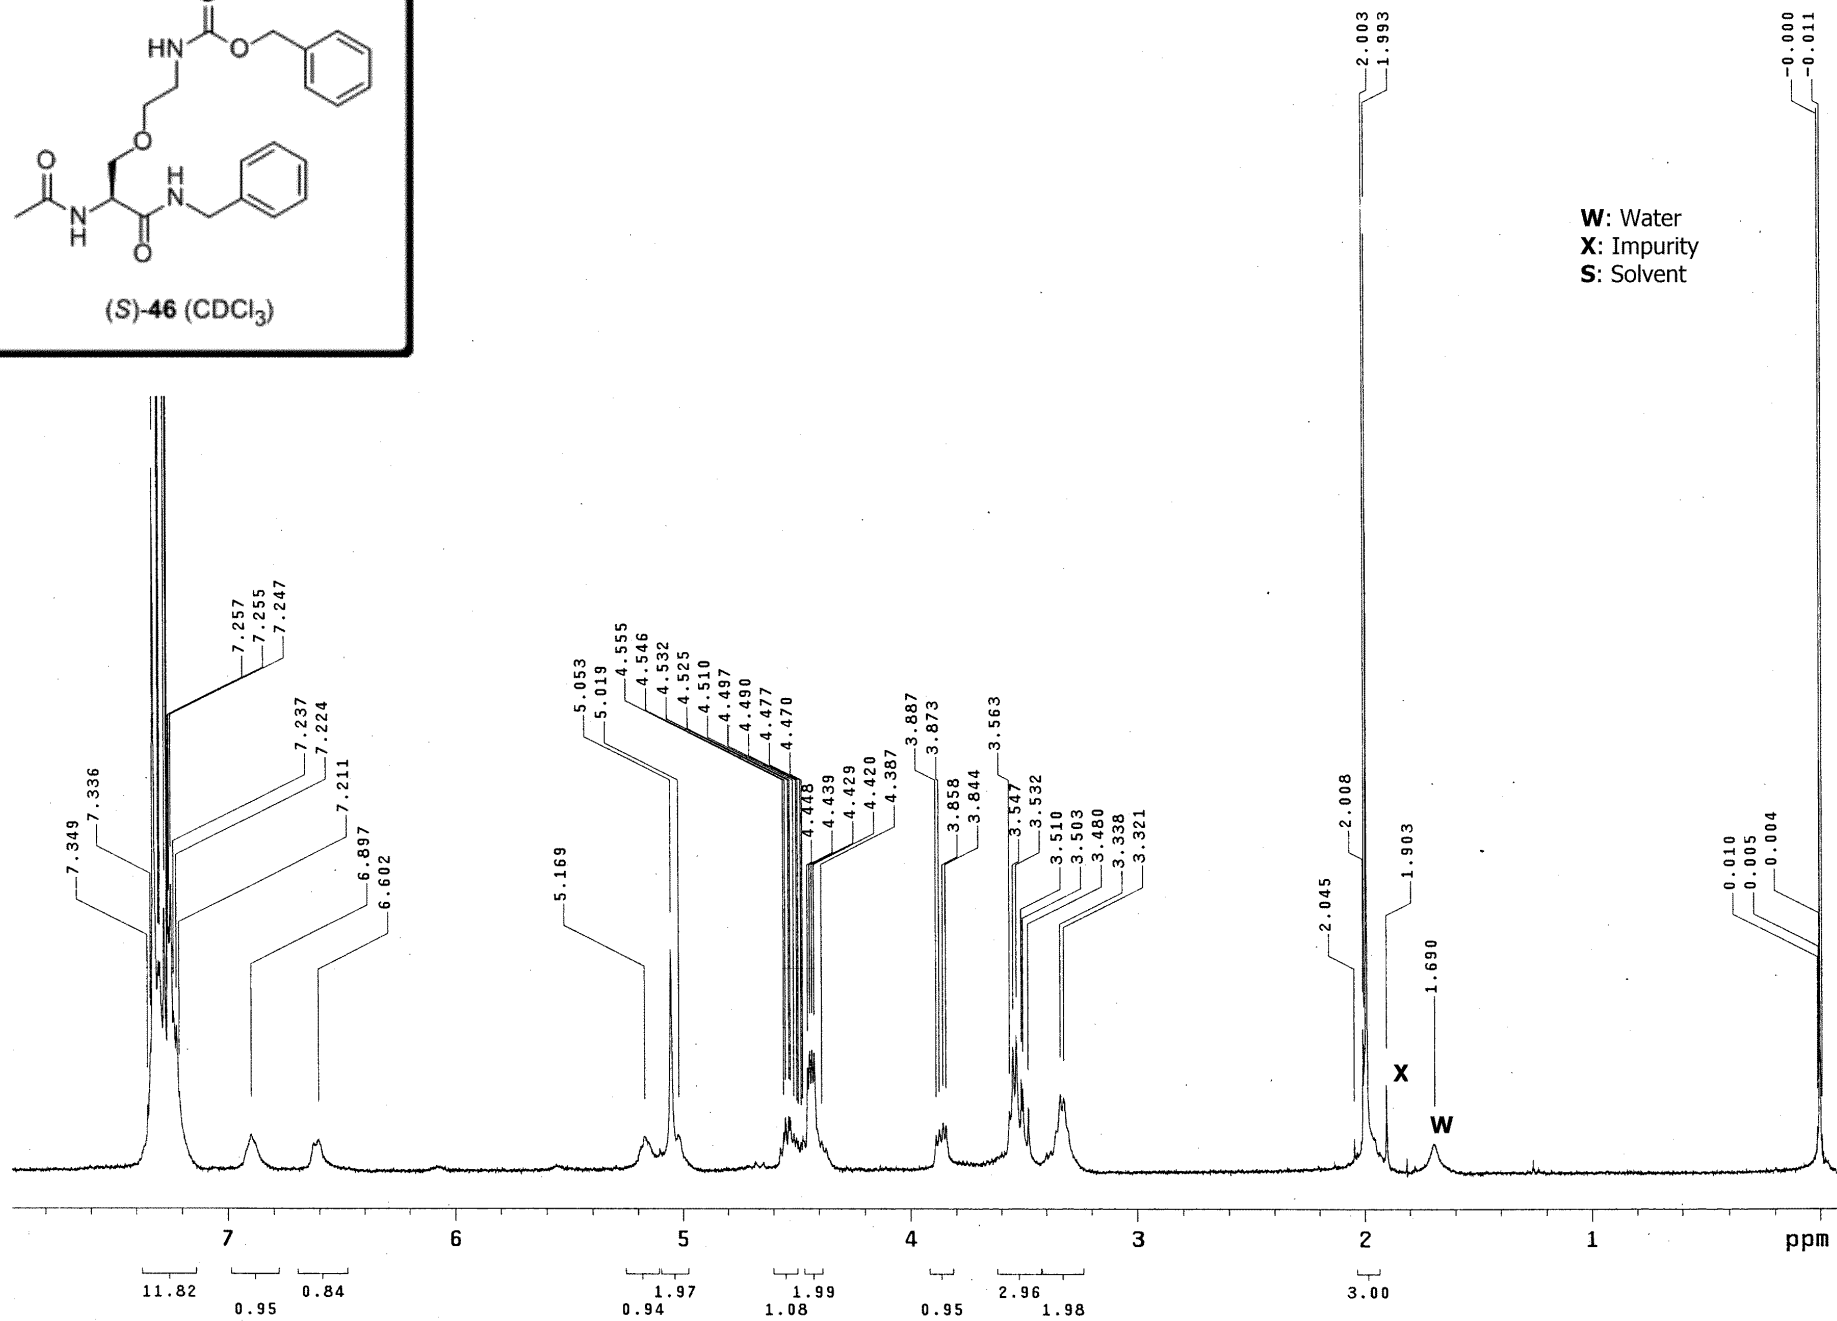

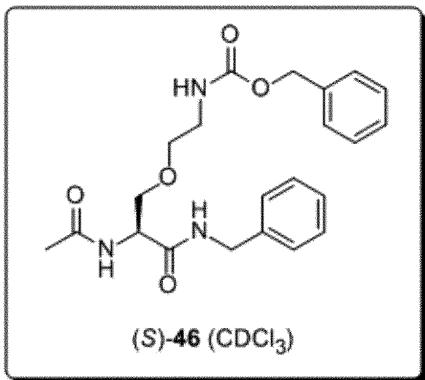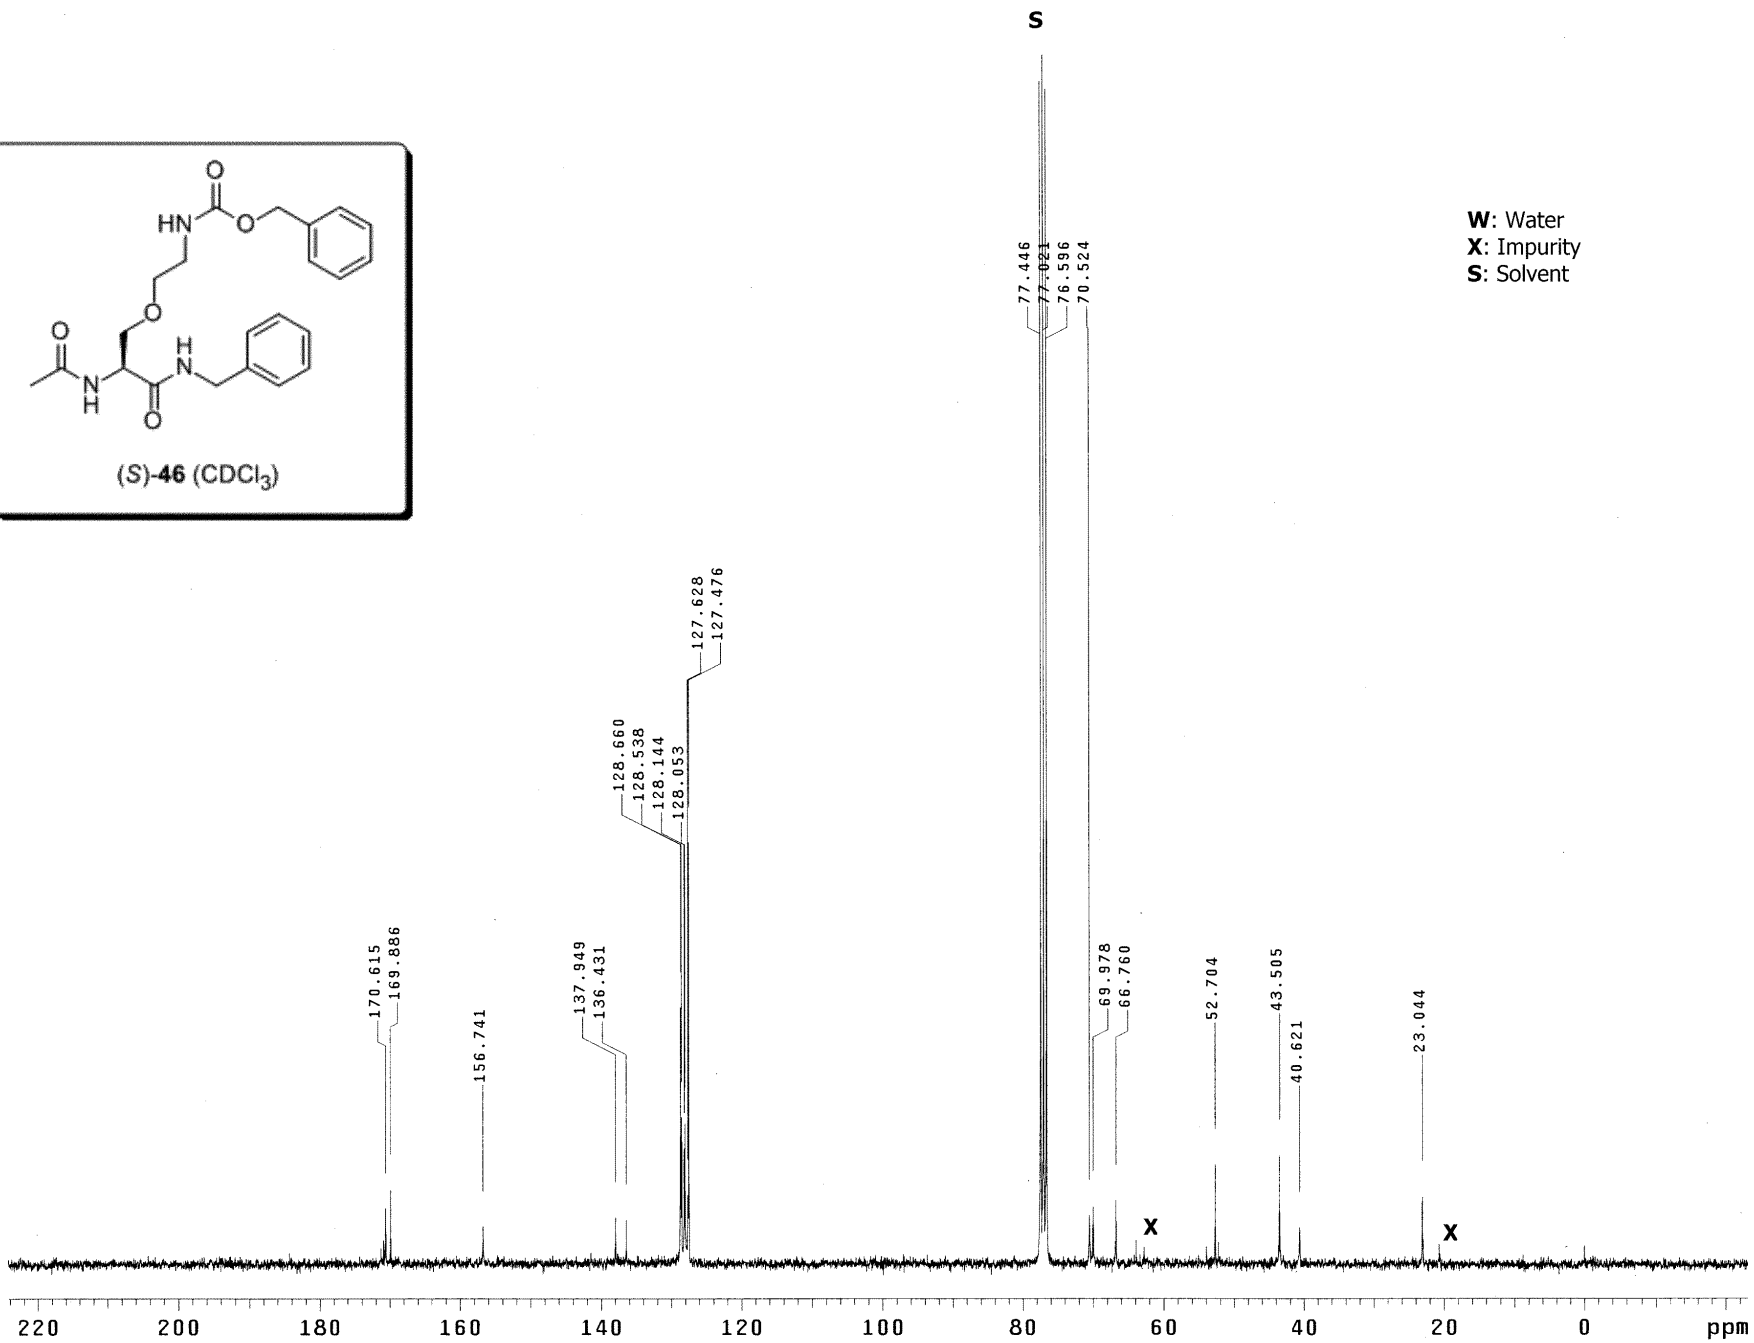

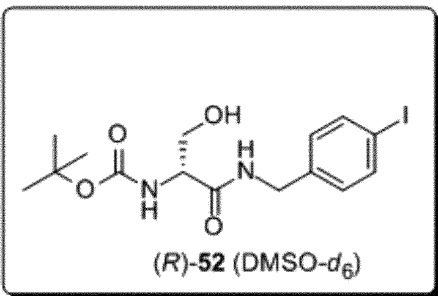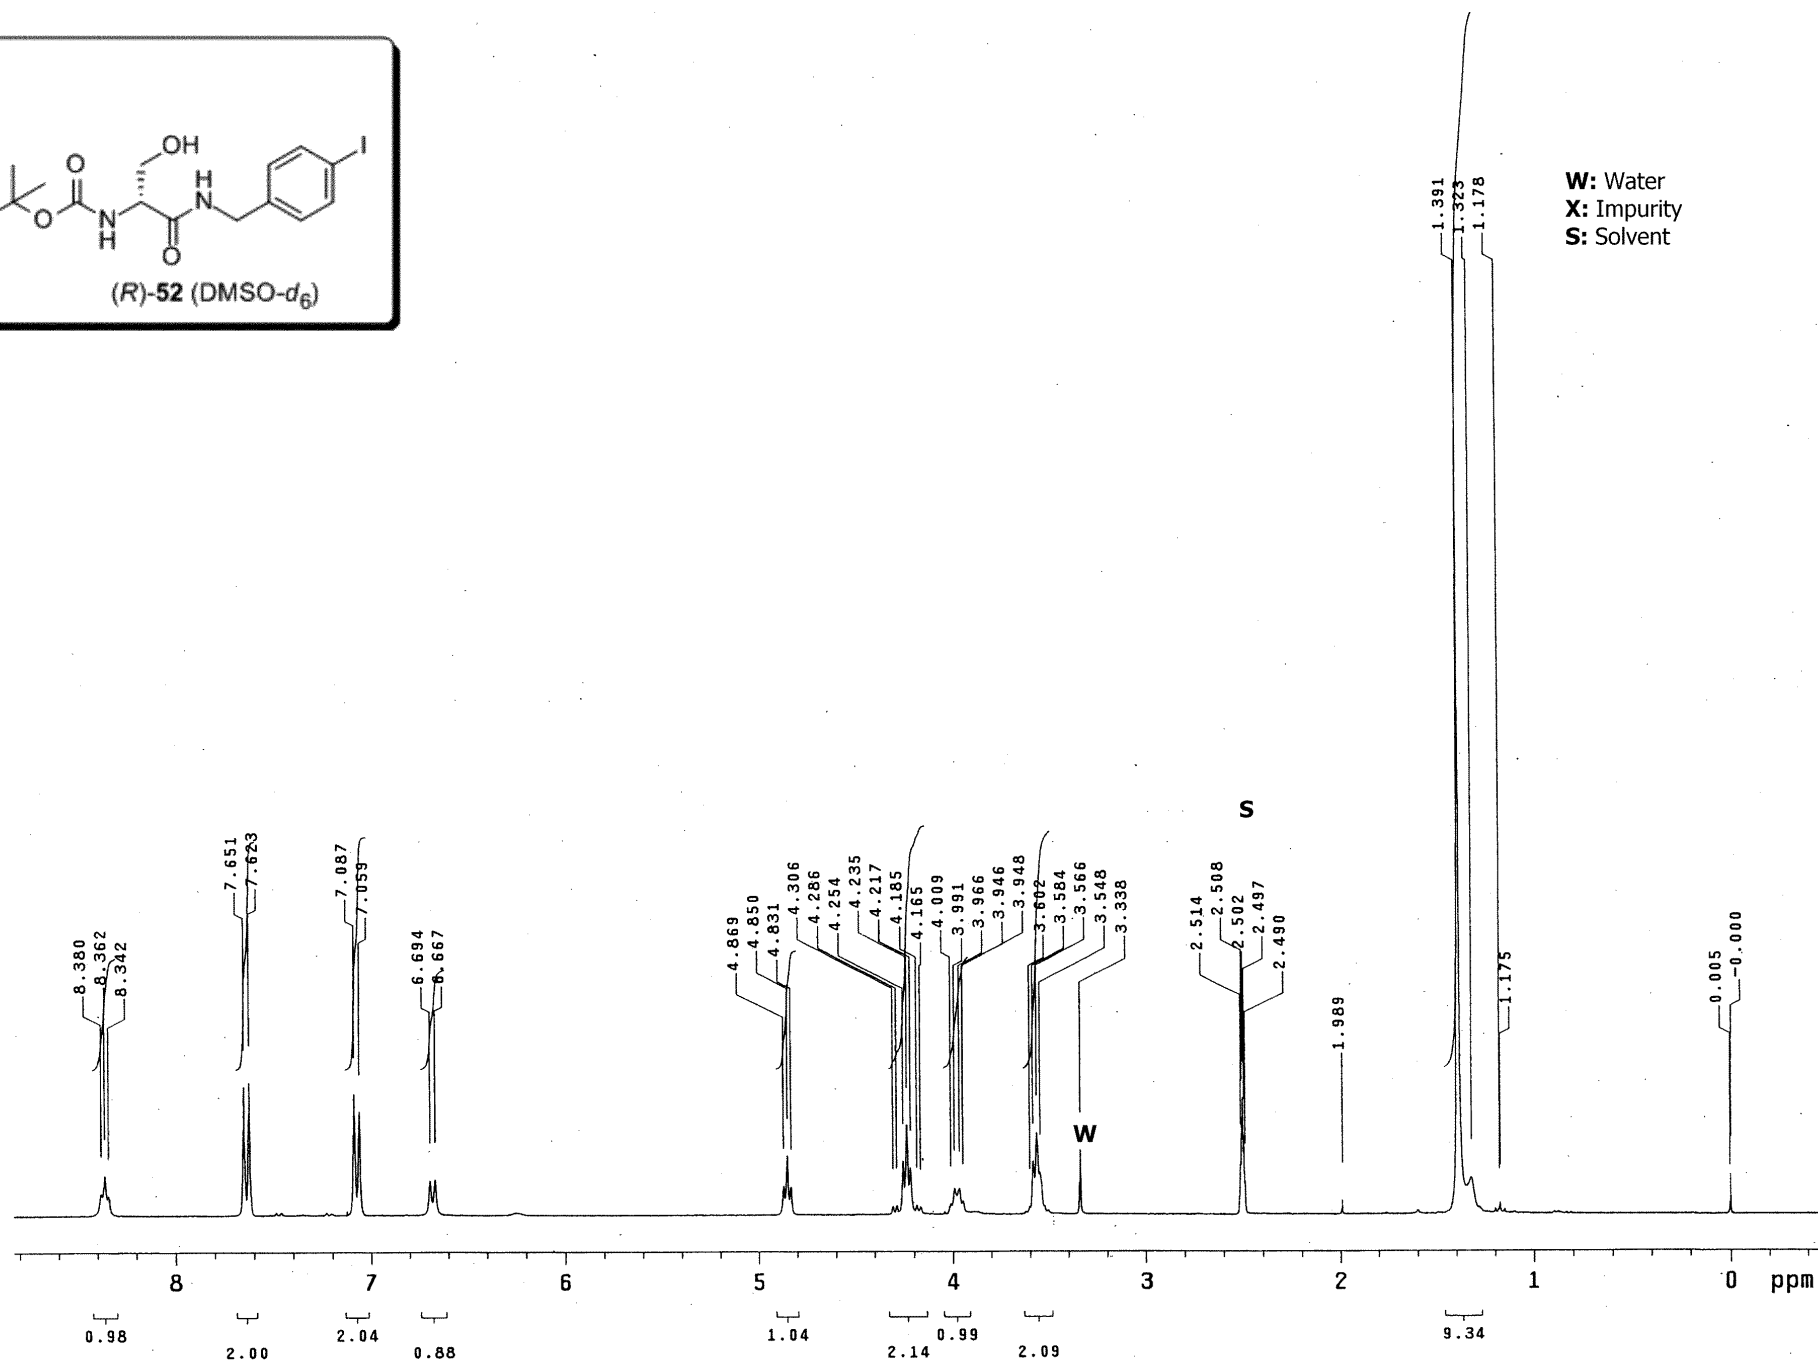



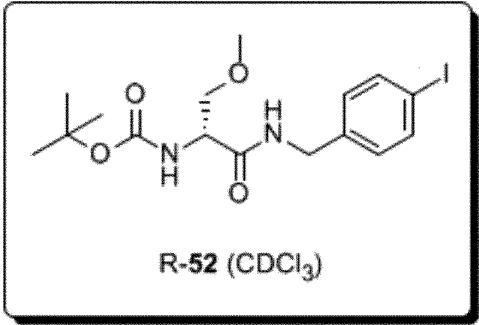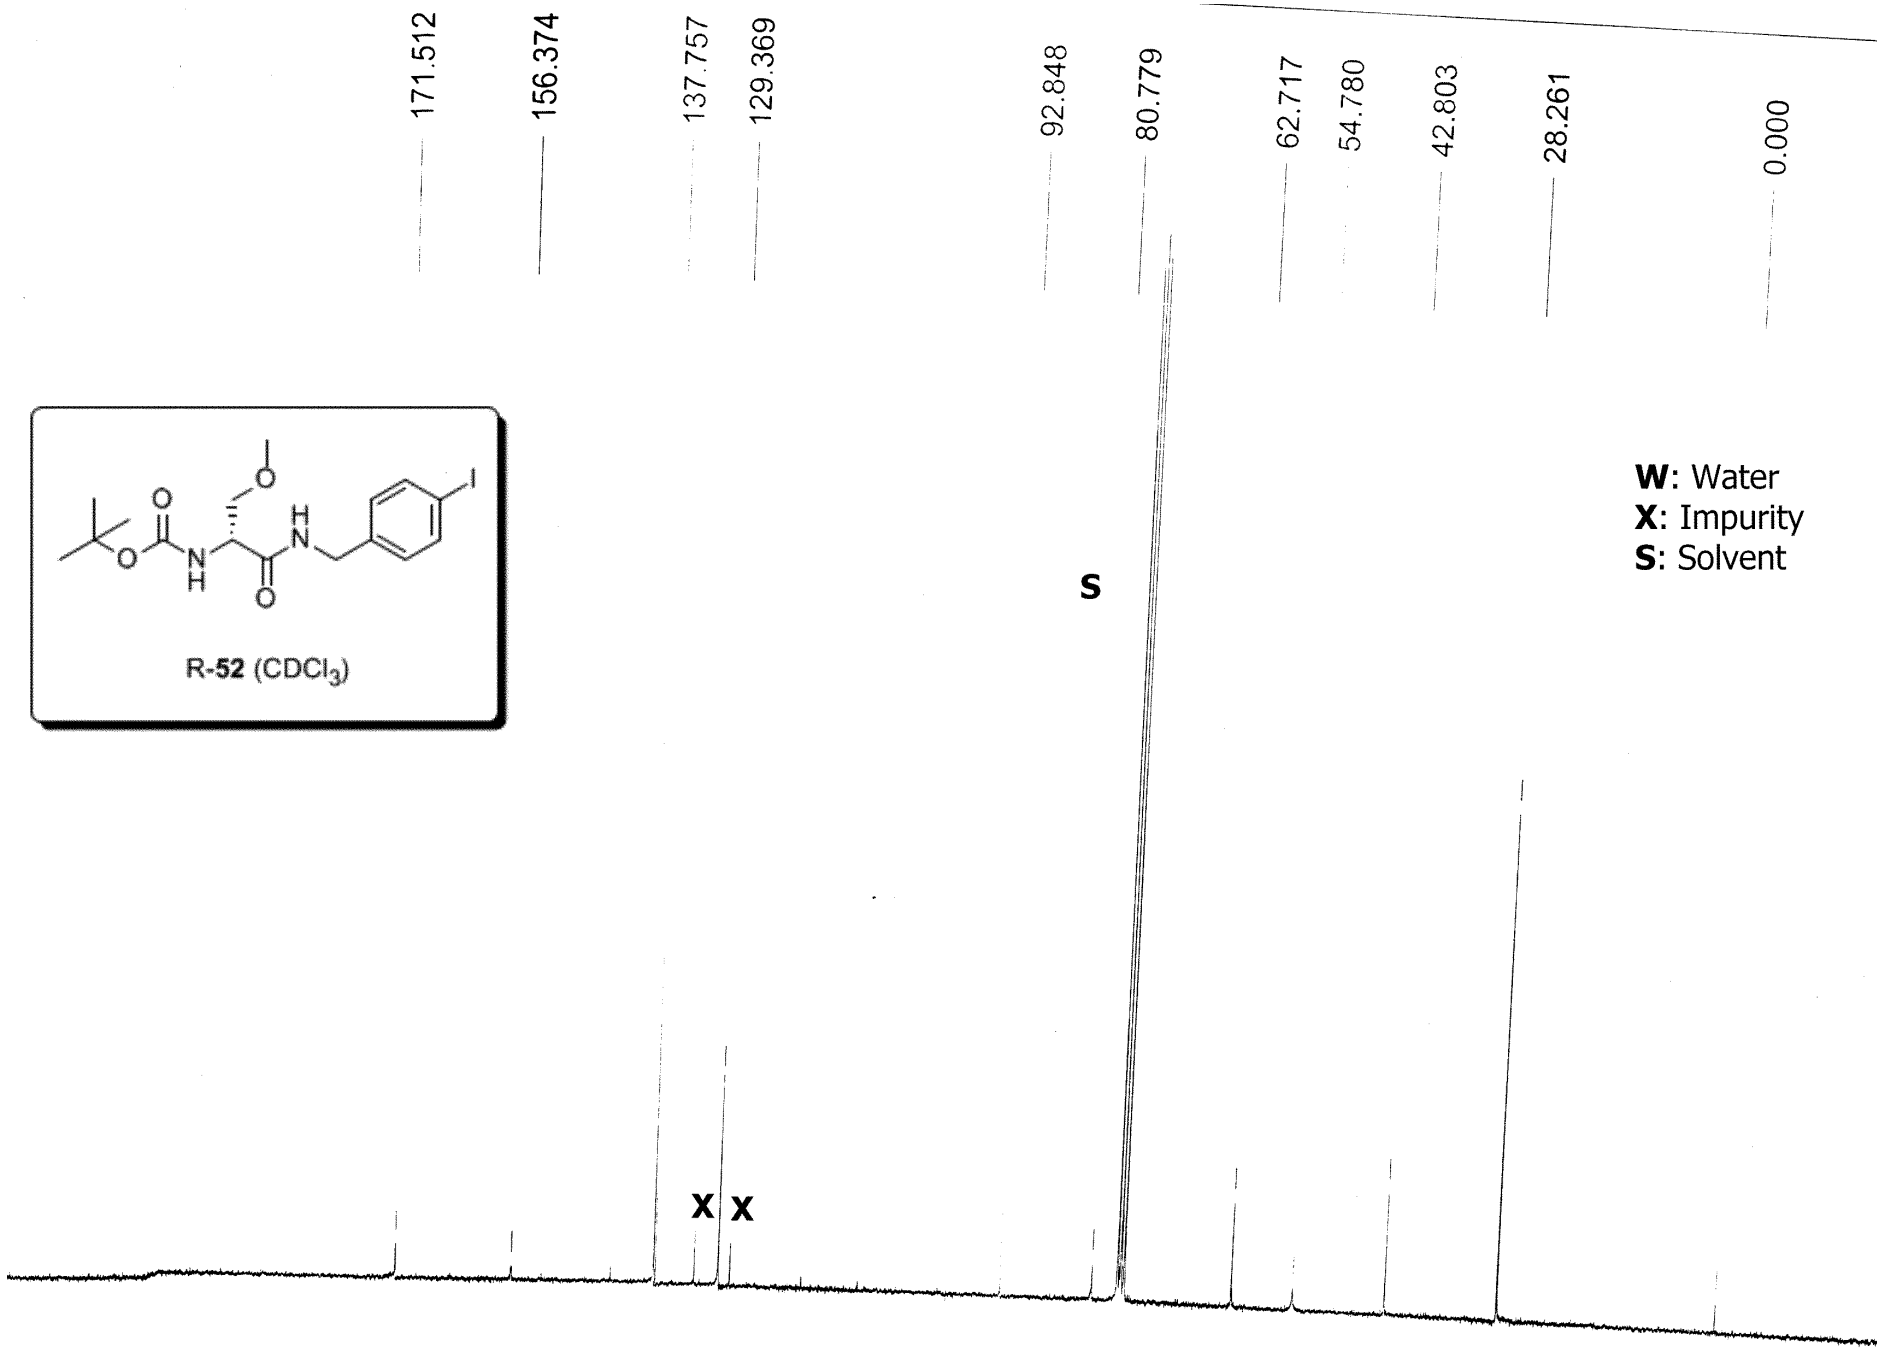

**W:** Water  
**X:** Impurity  
**S:** Solvent

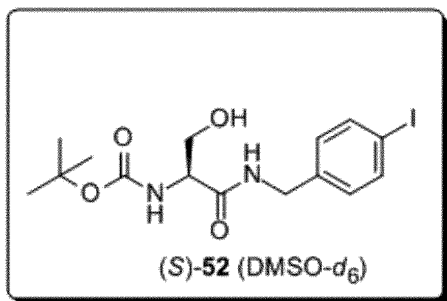

W: Water  
 X: Impurity  
 S: Solvent

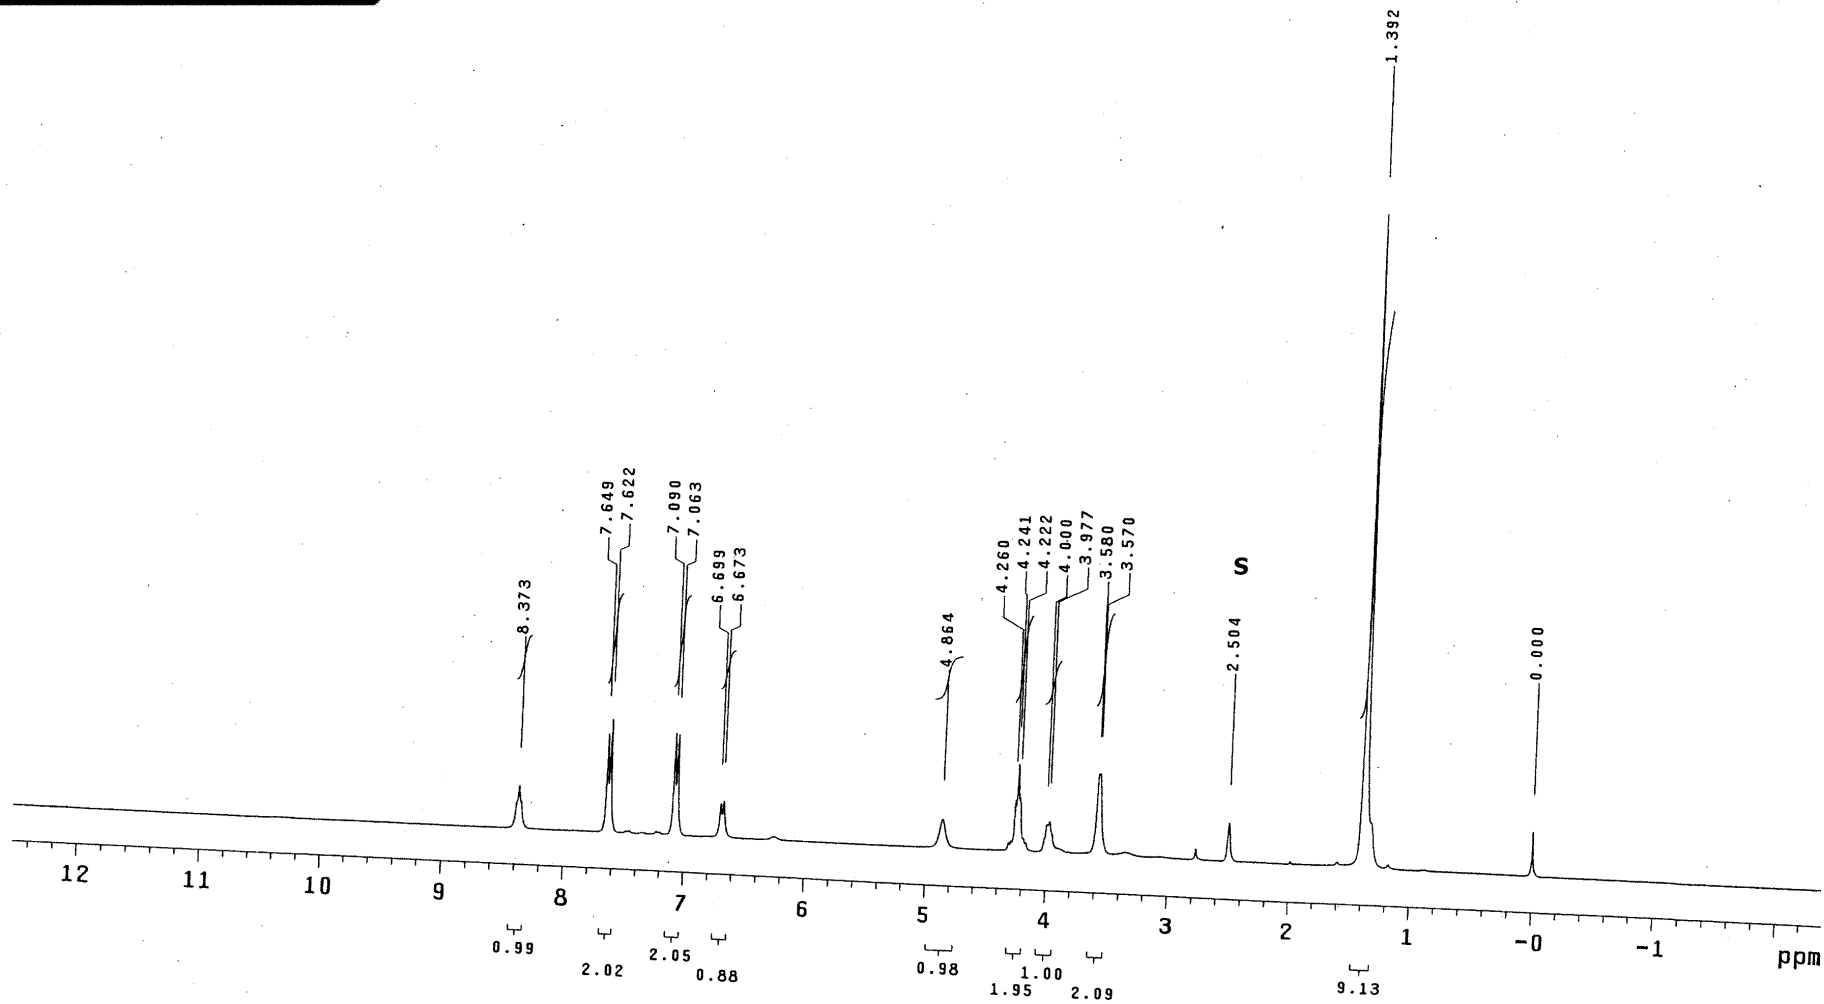

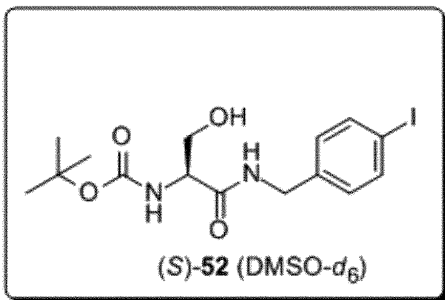

W: Water  
X: Impurity  
S: Solvent

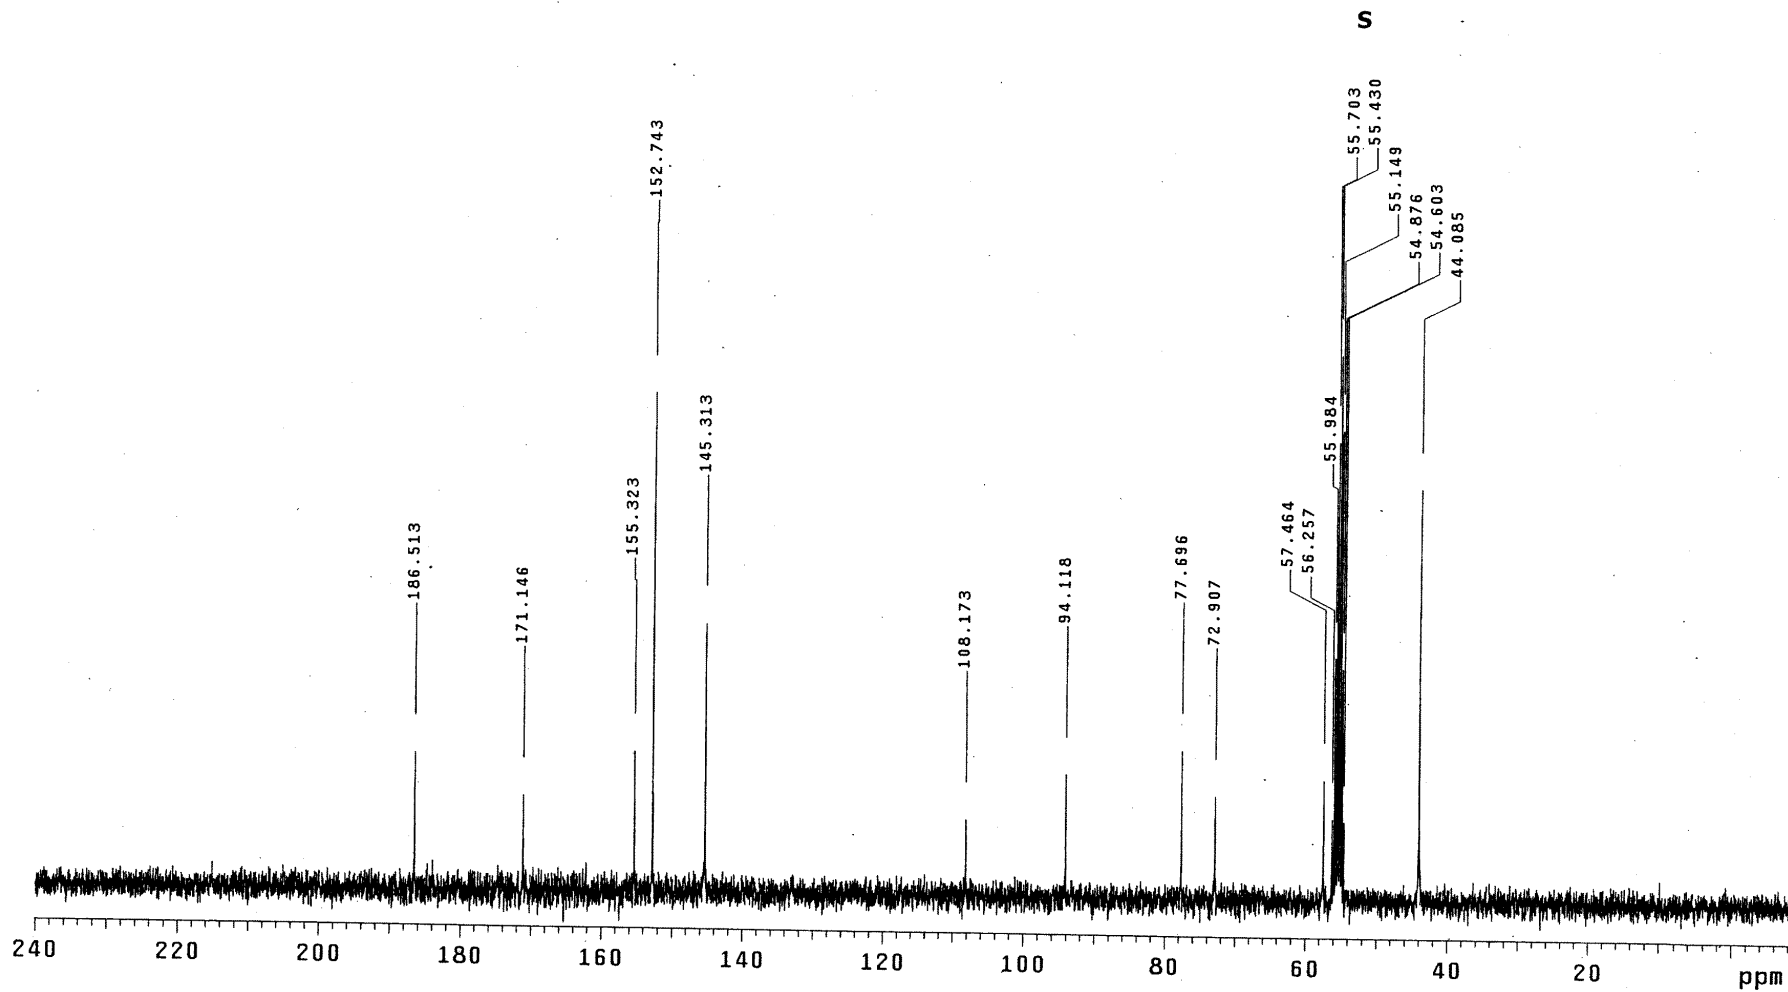

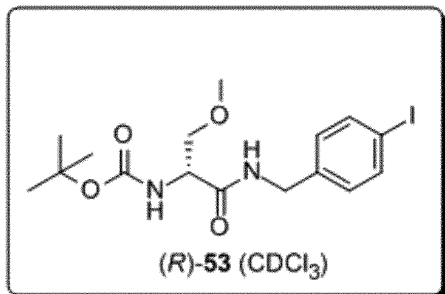

W: Water  
 X: Impurity  
 S: Solvent

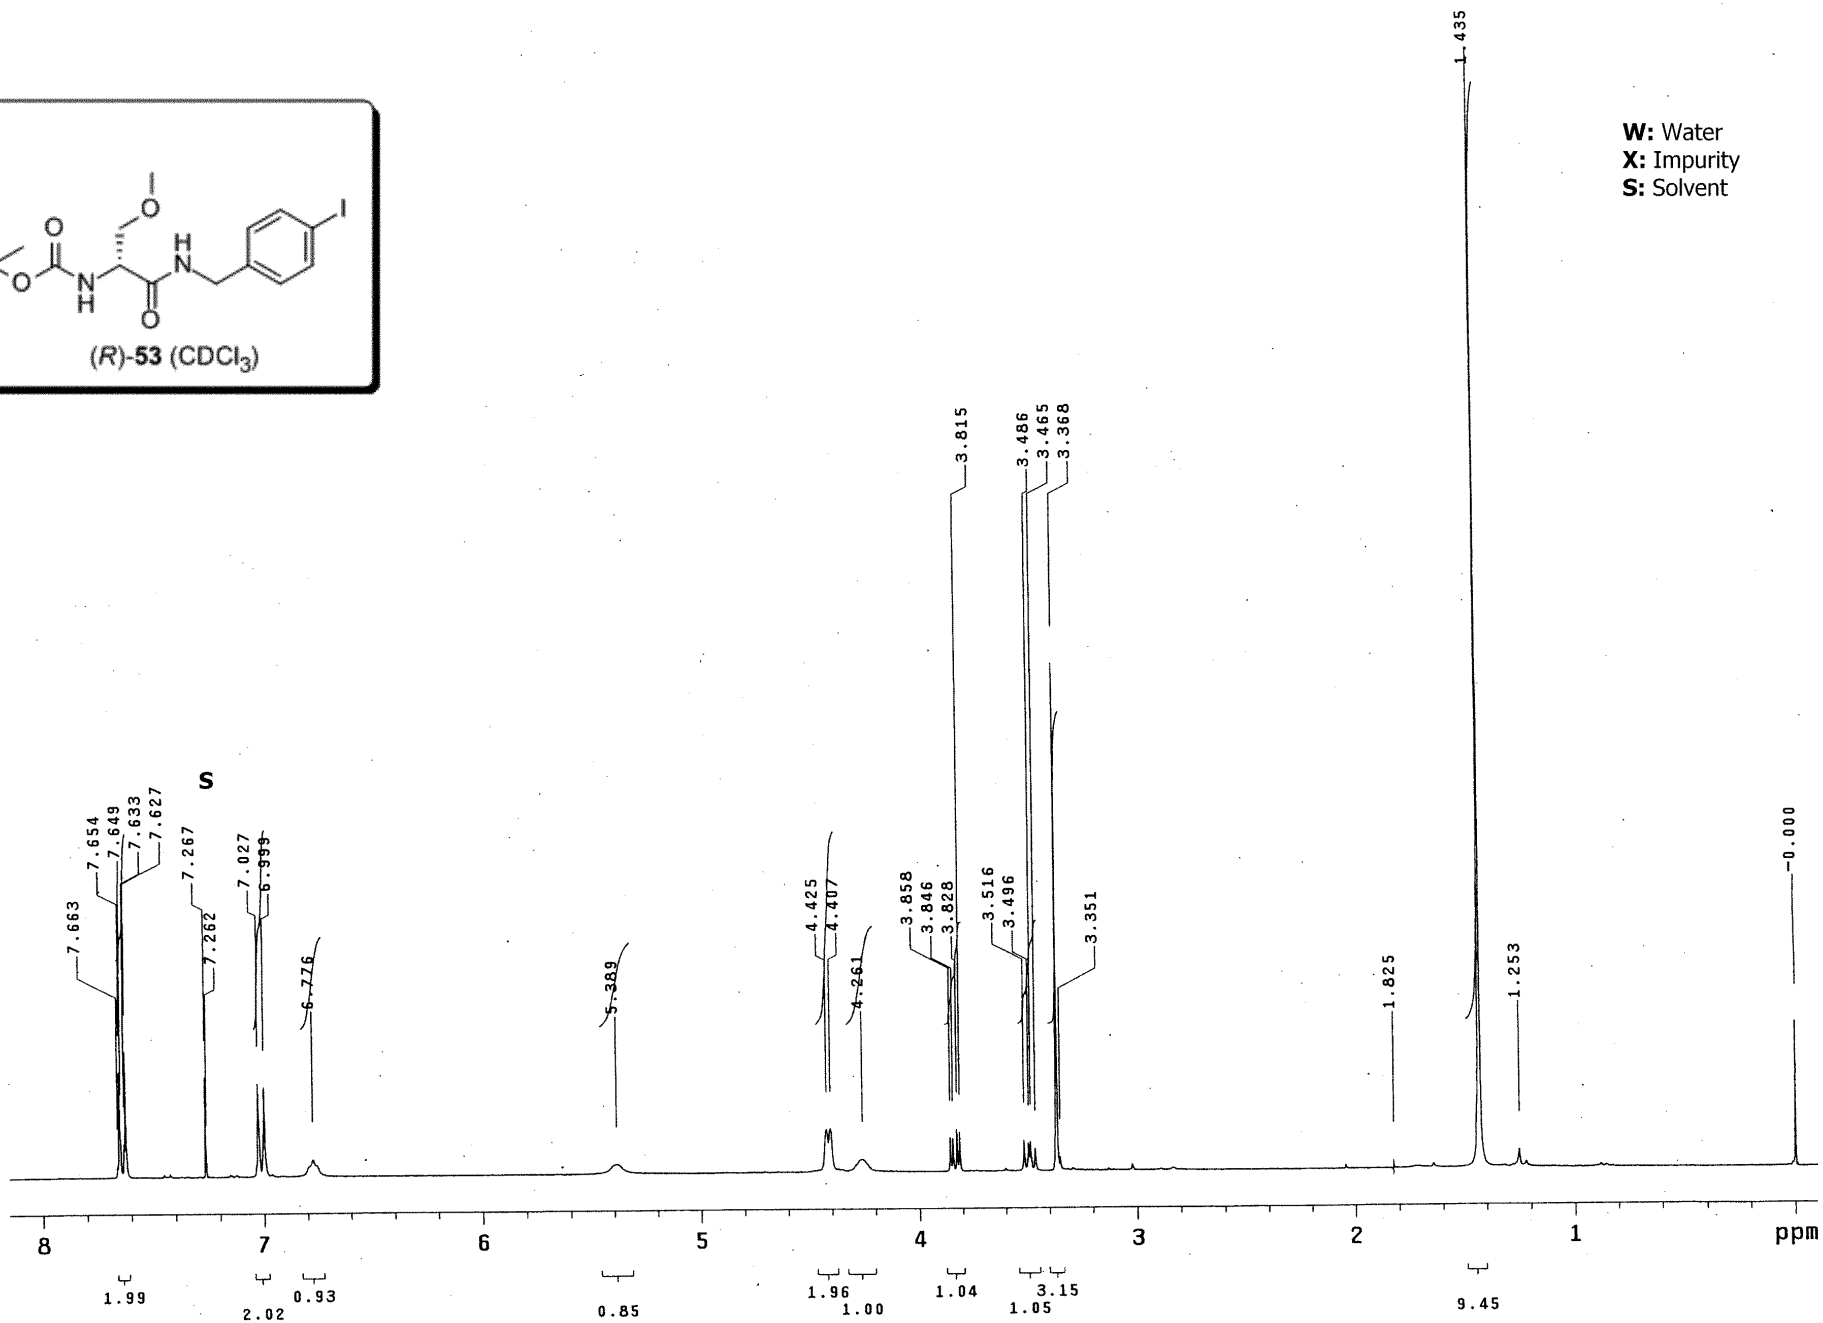

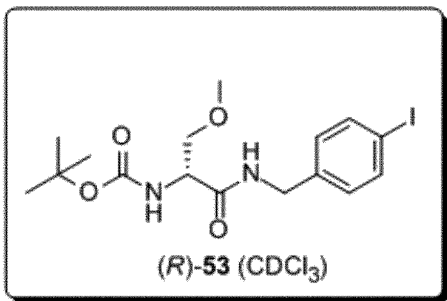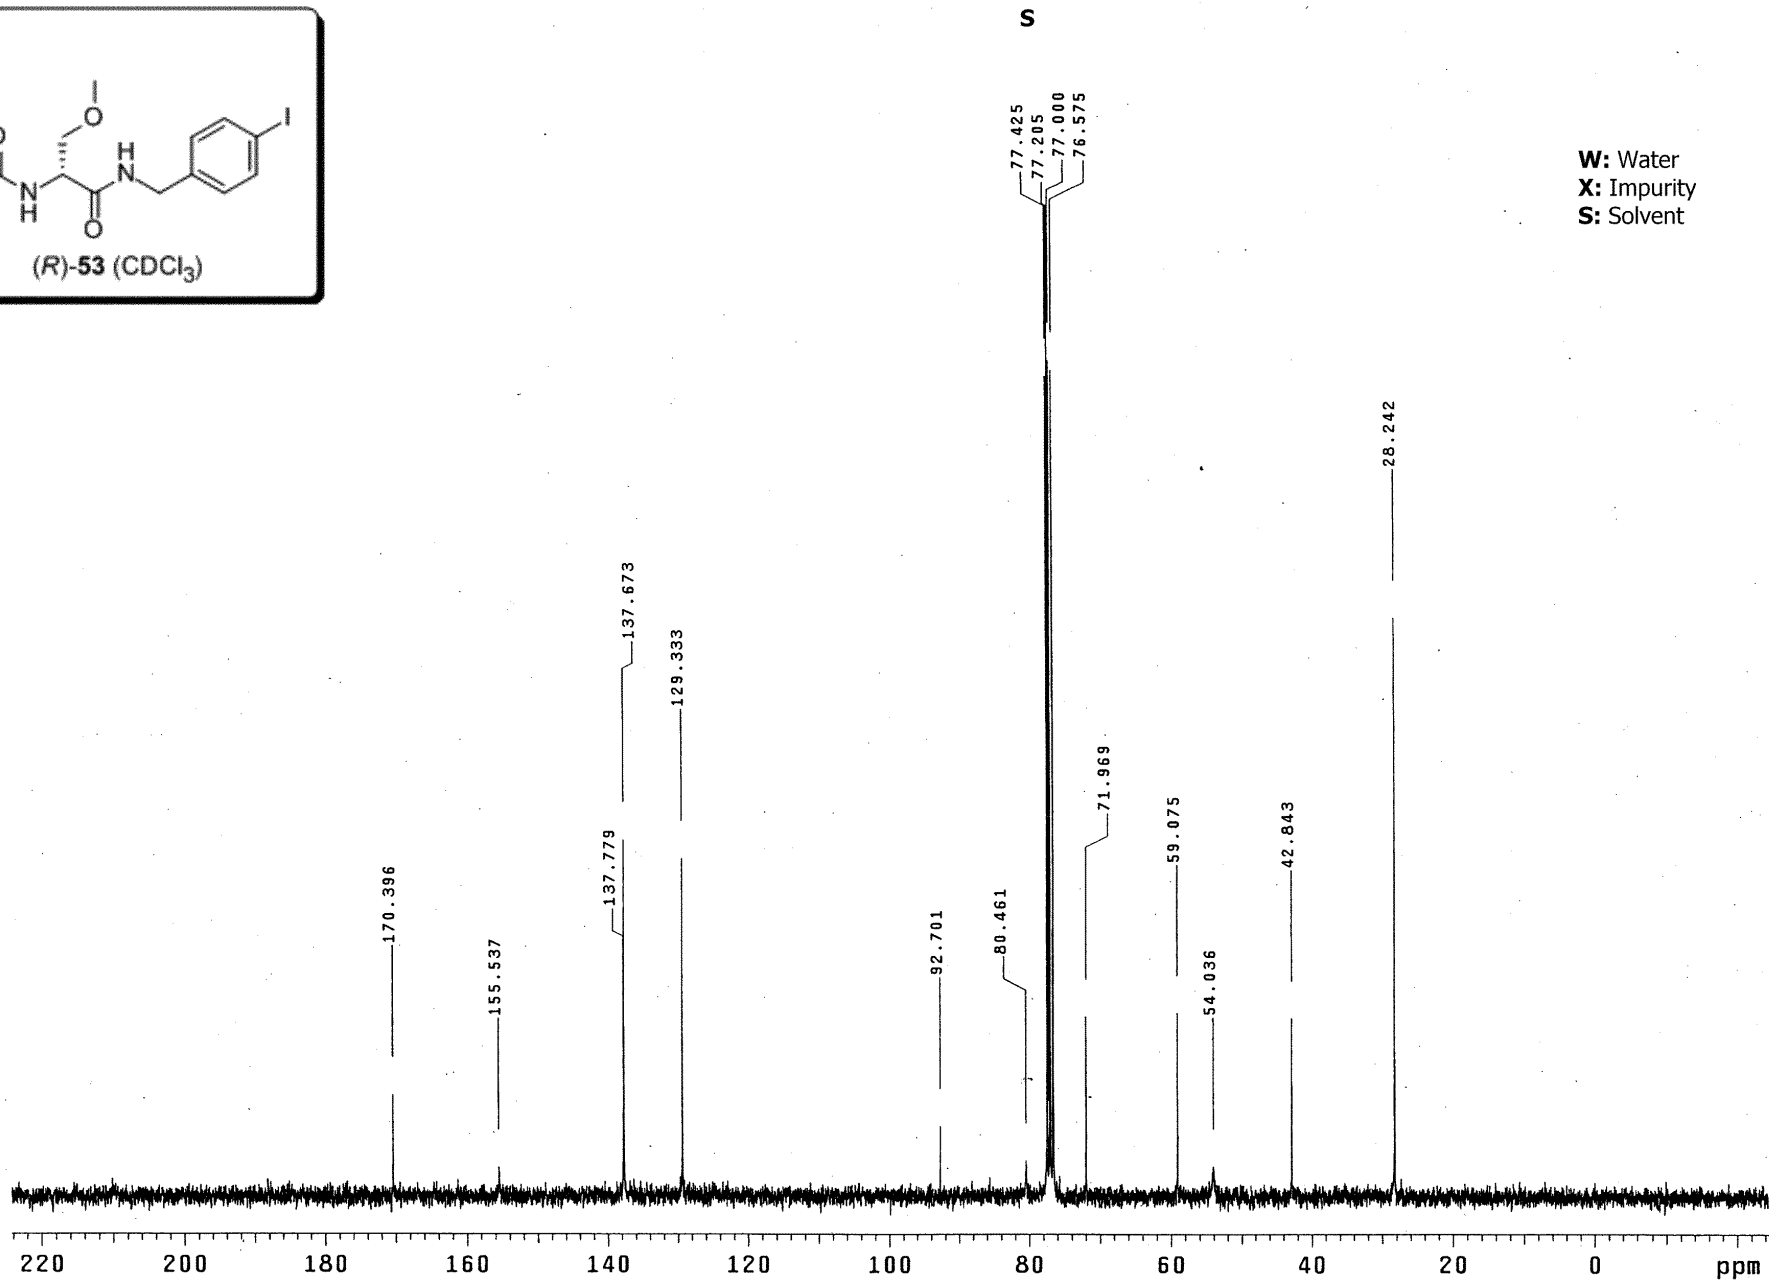

W: Water  
X: Impurity  
S: Solvent

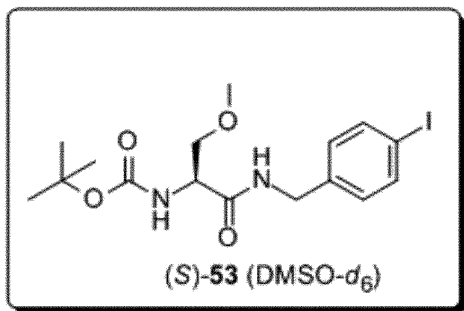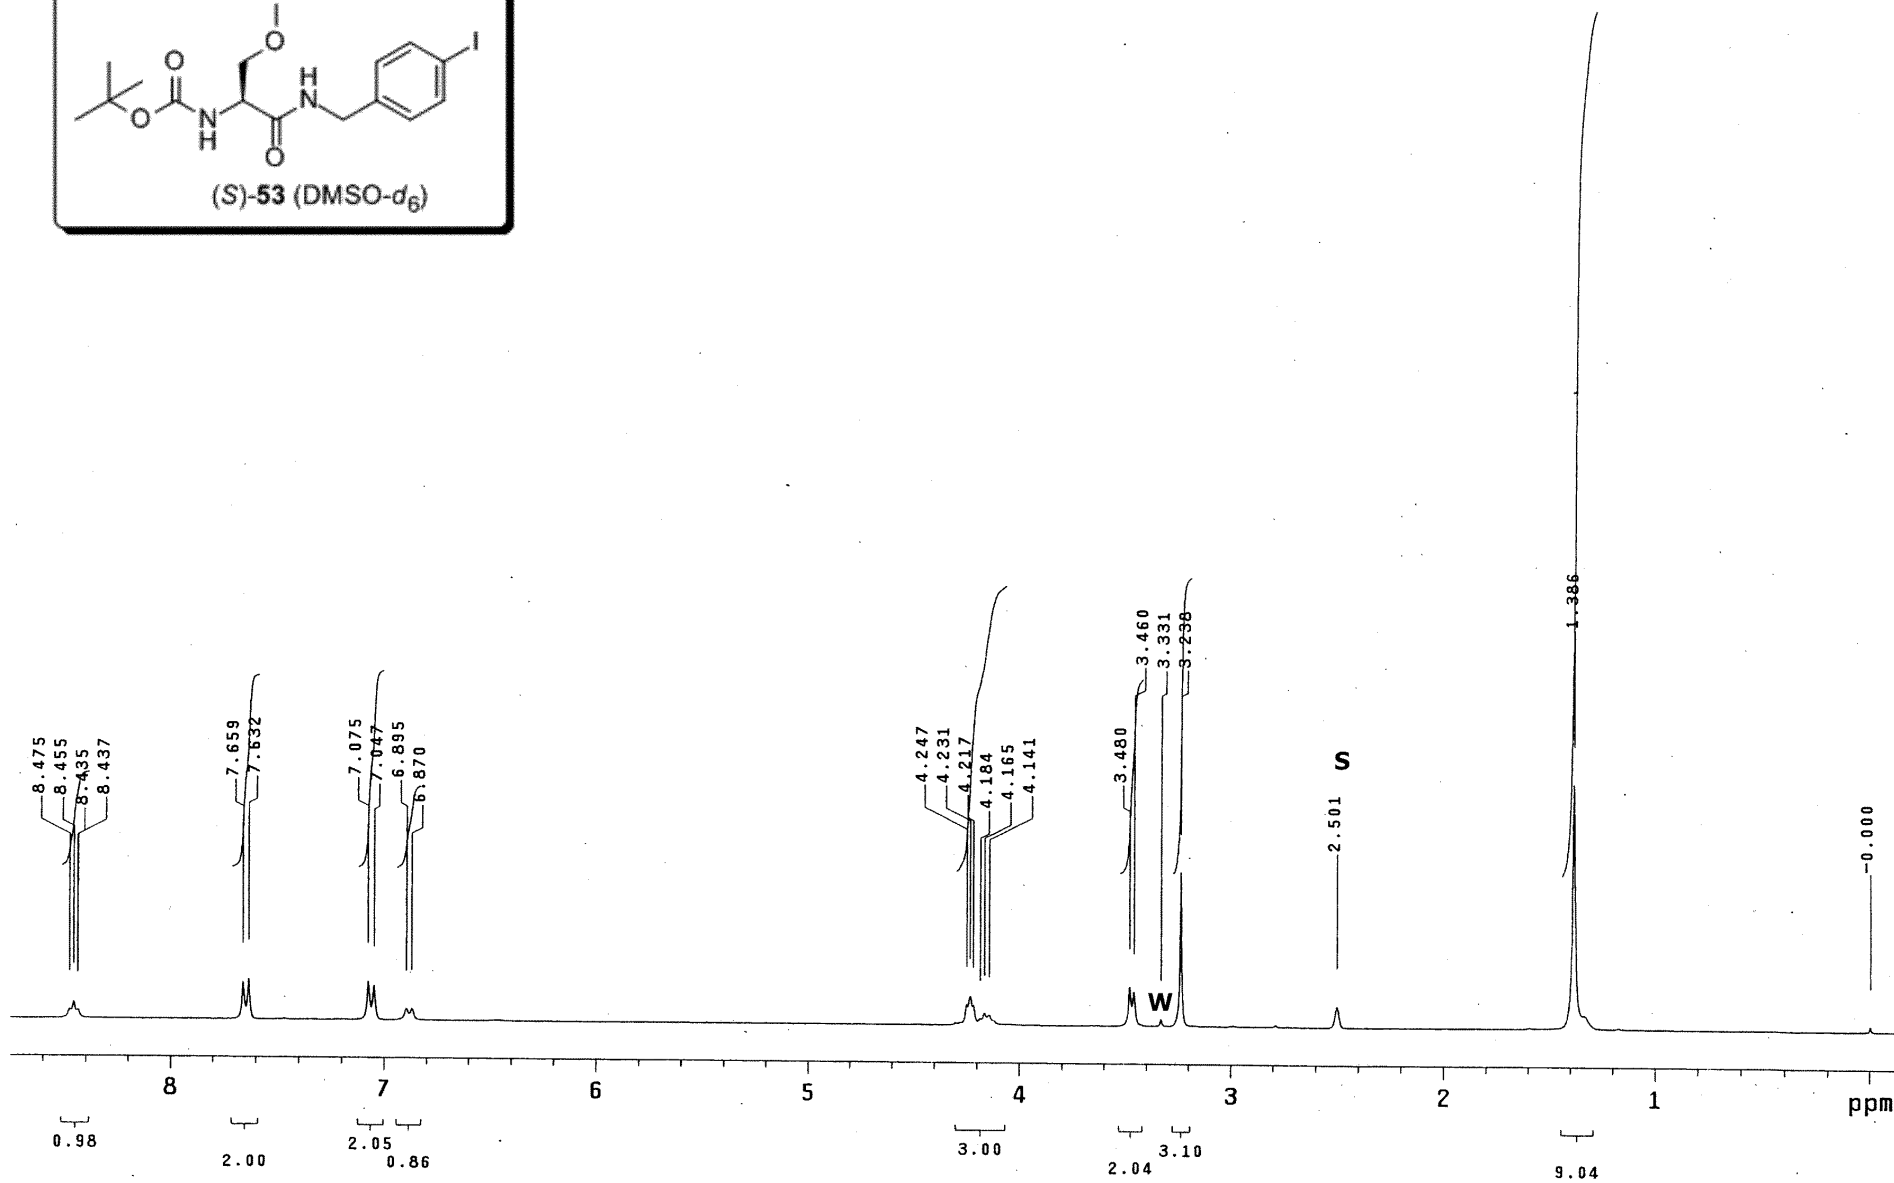

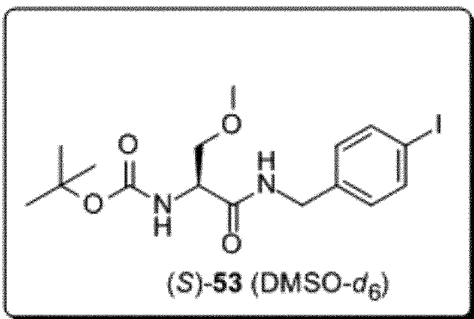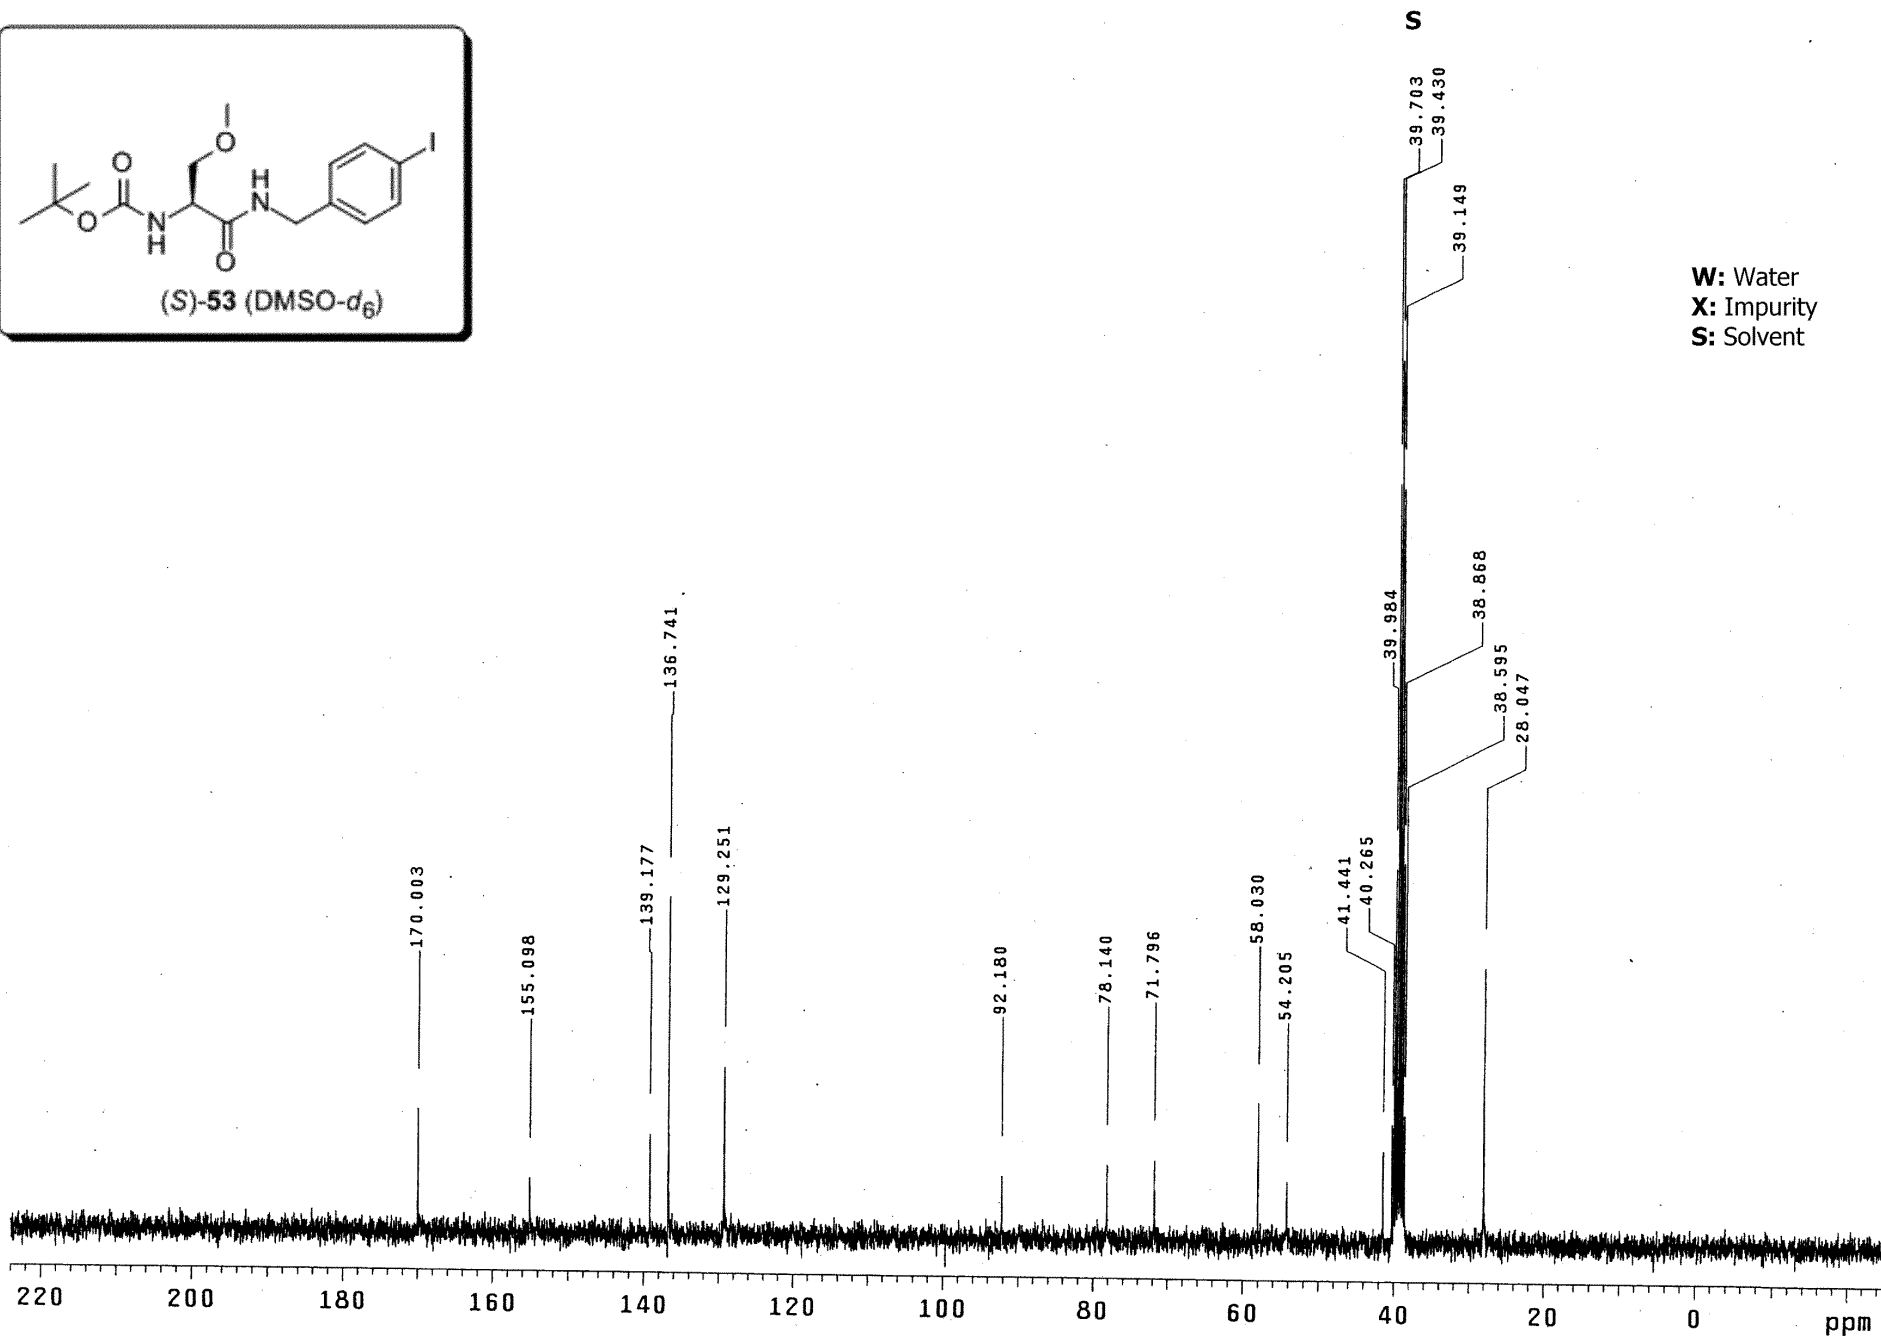

W: Water  
X: Impurity  
S: Solvent

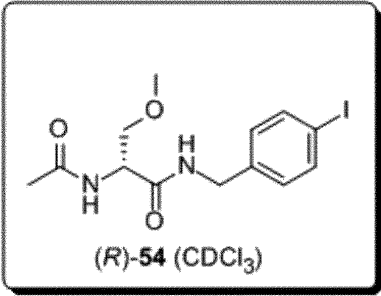

W: Water  
 X: Impurity  
 S: Solvent

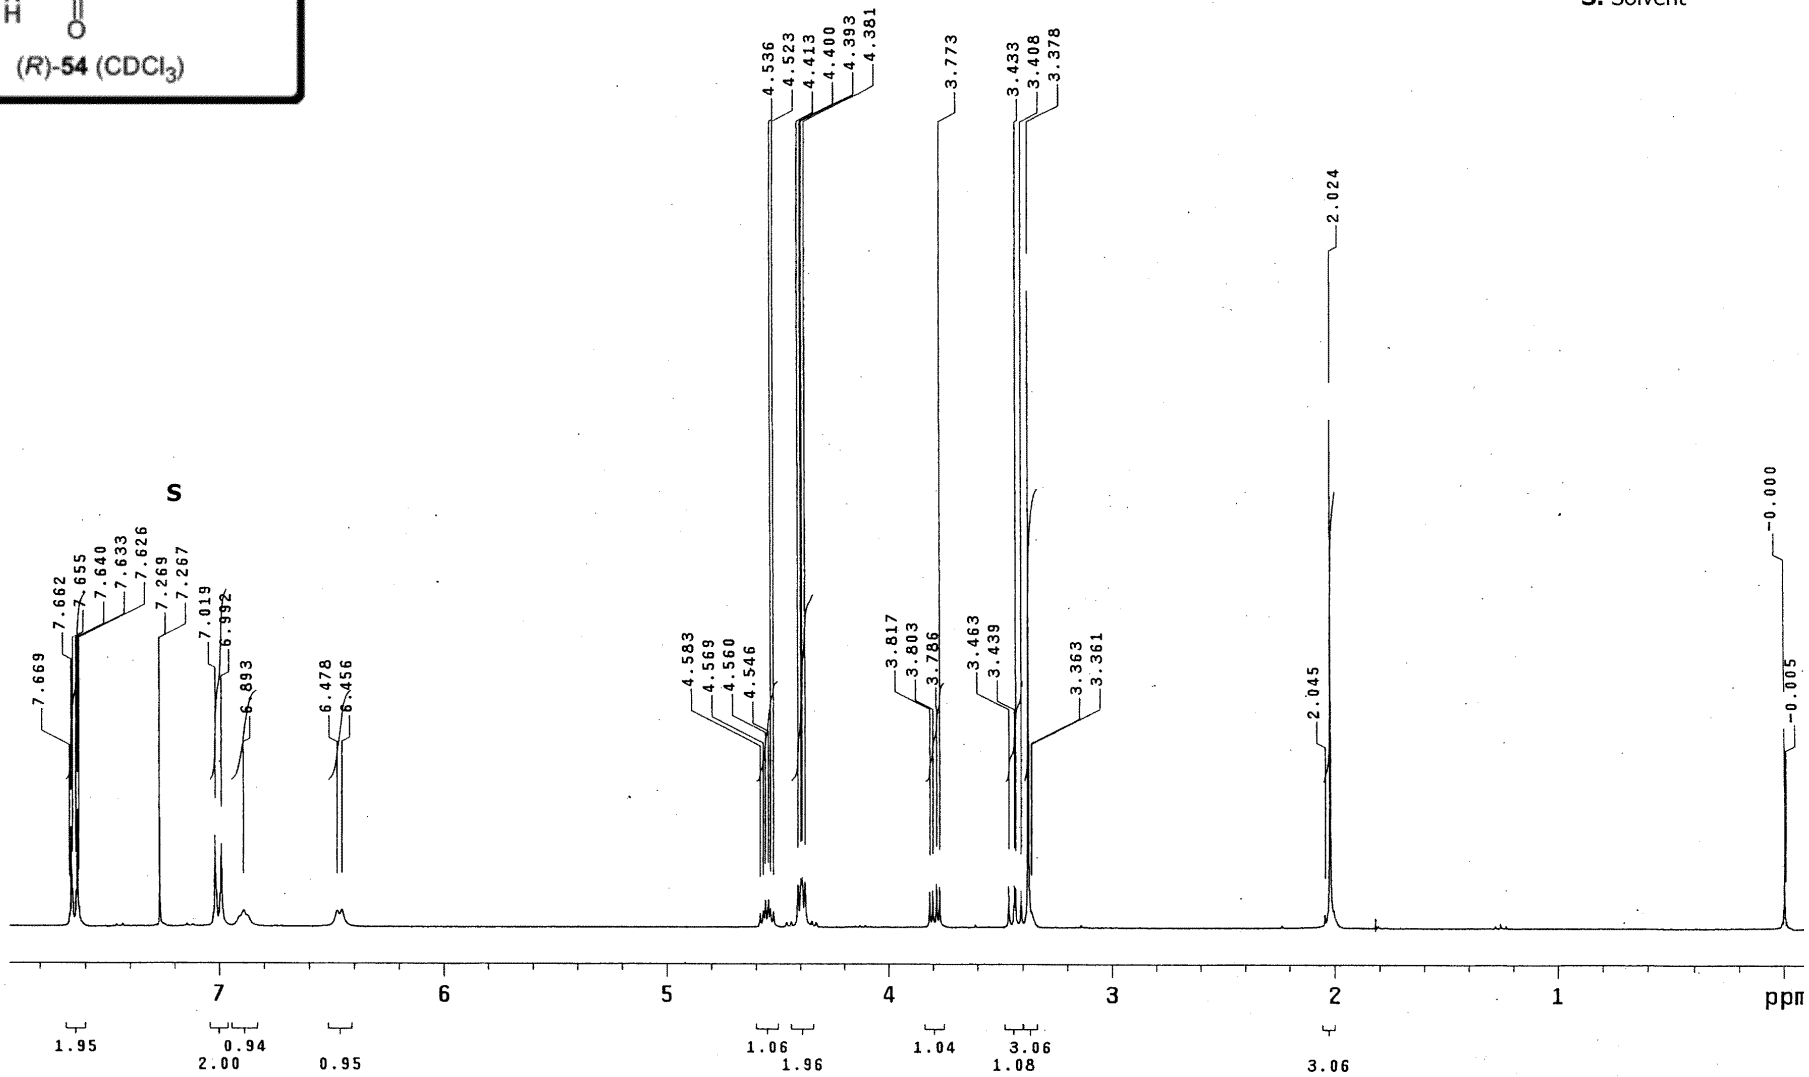



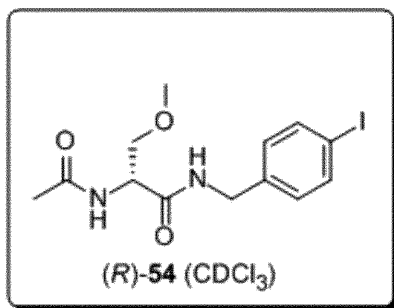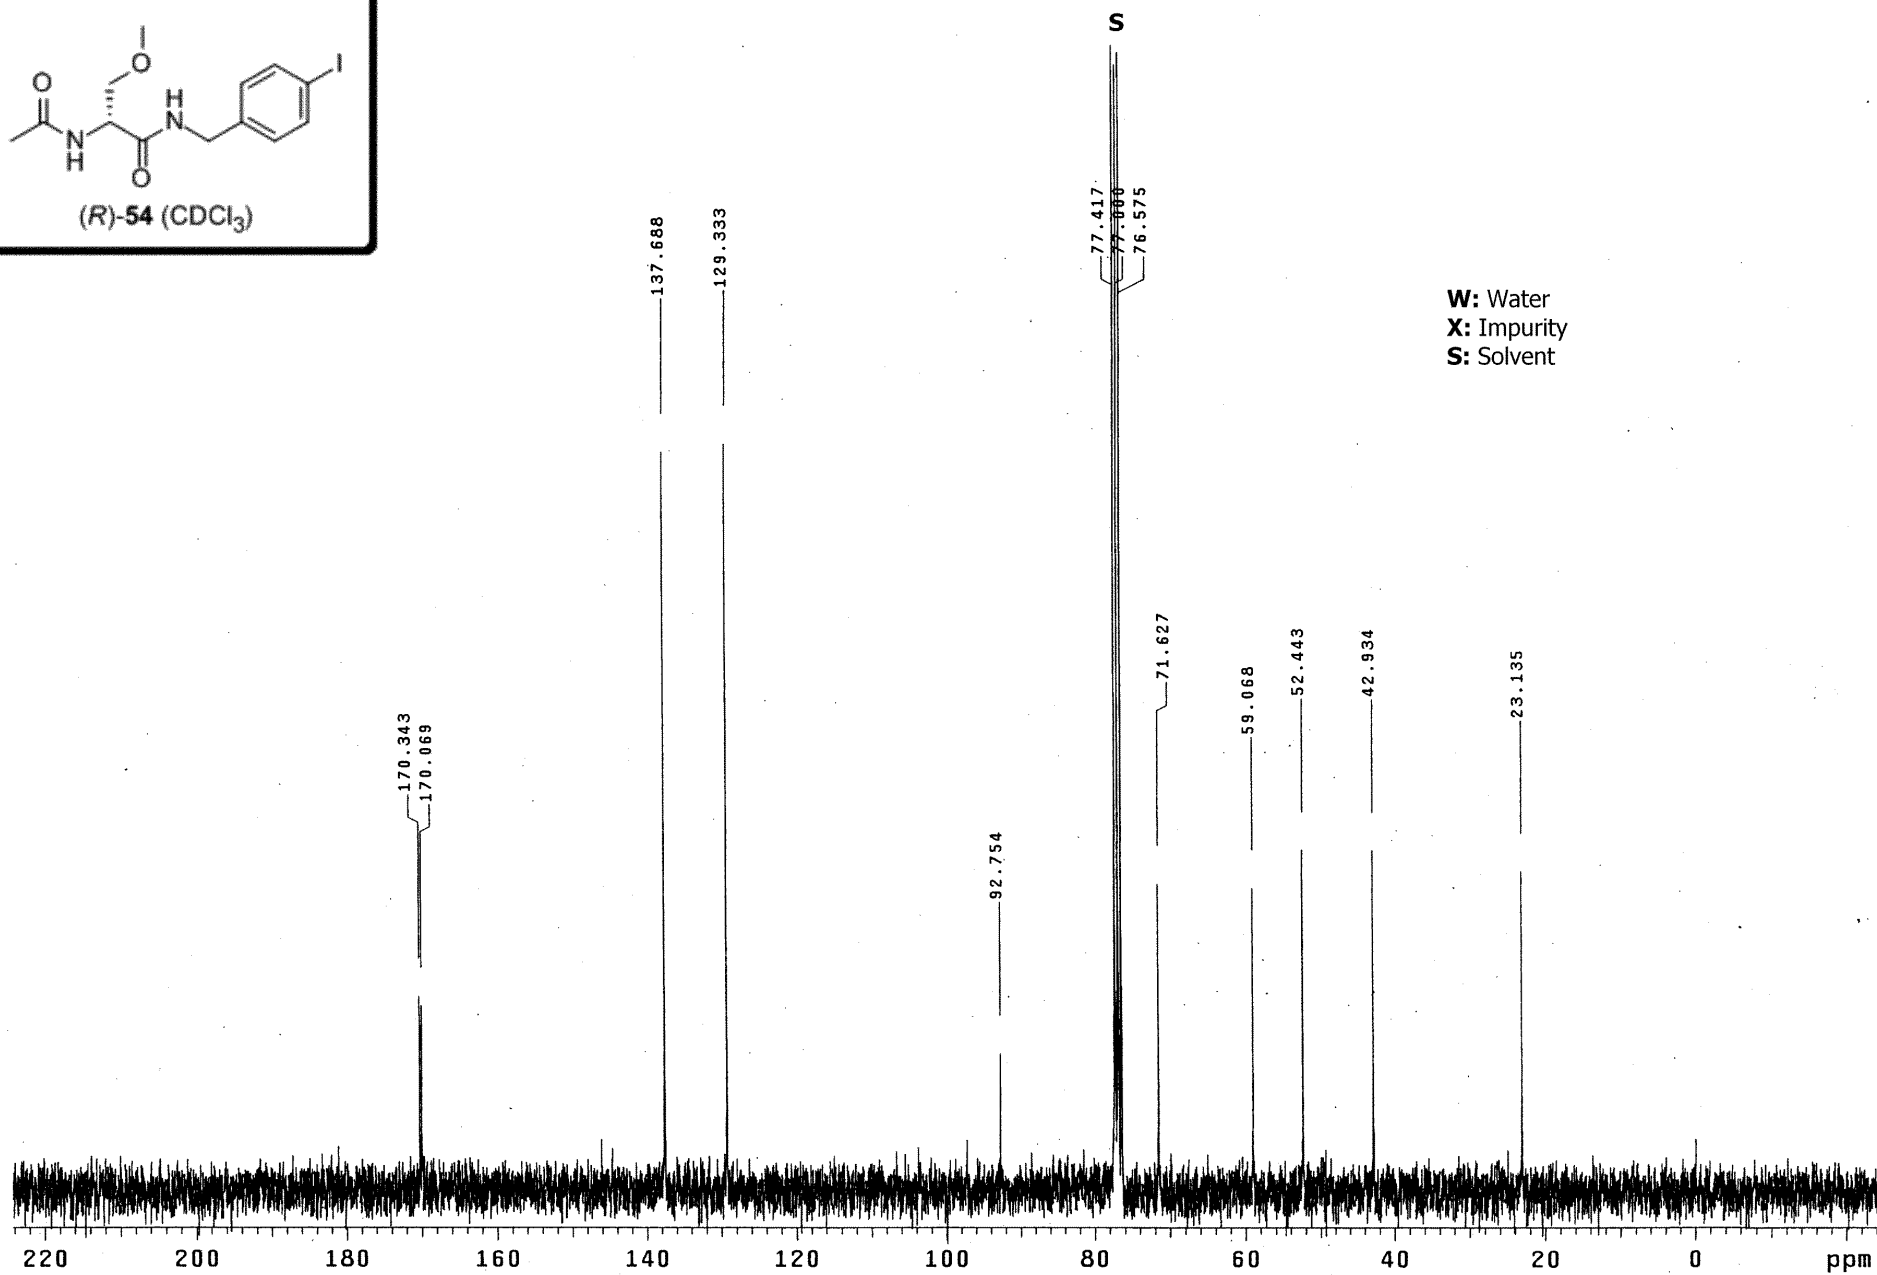

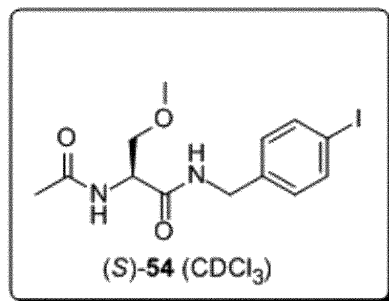

W: Water  
 X: Impurity  
 S: Solvent

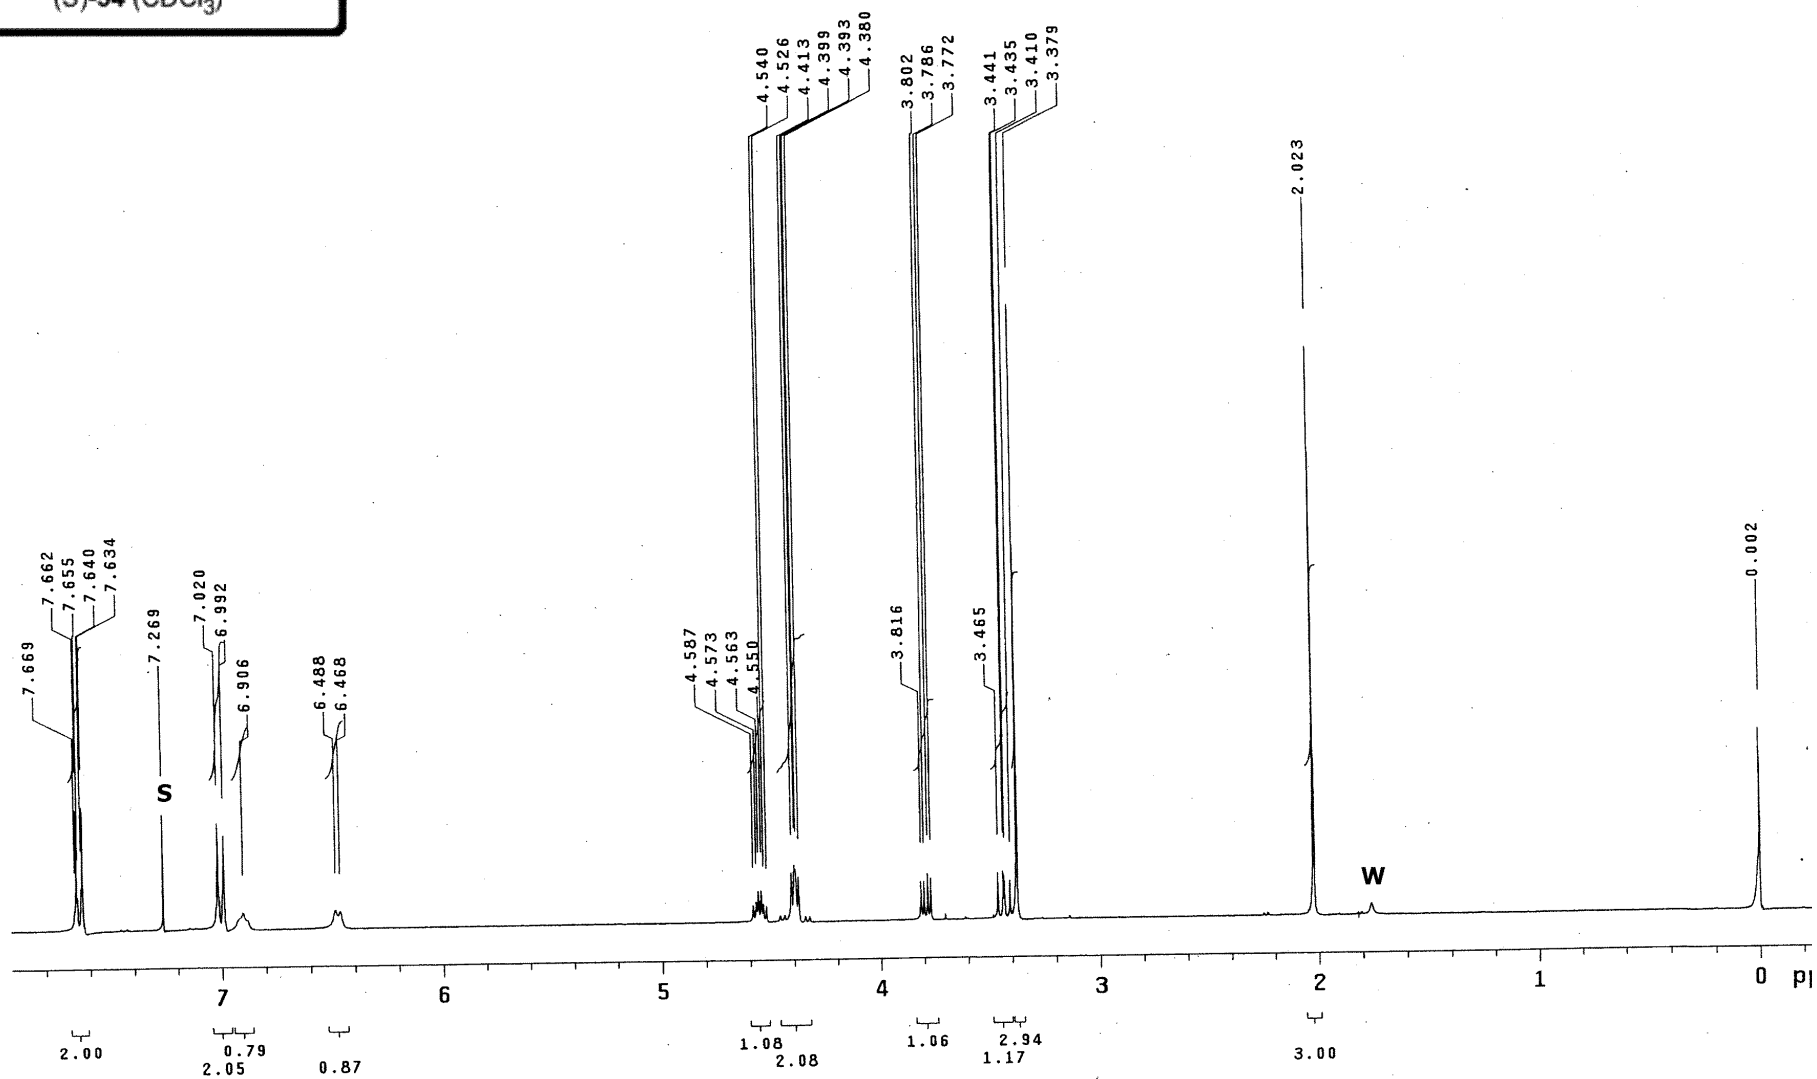

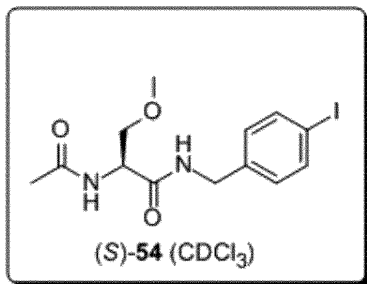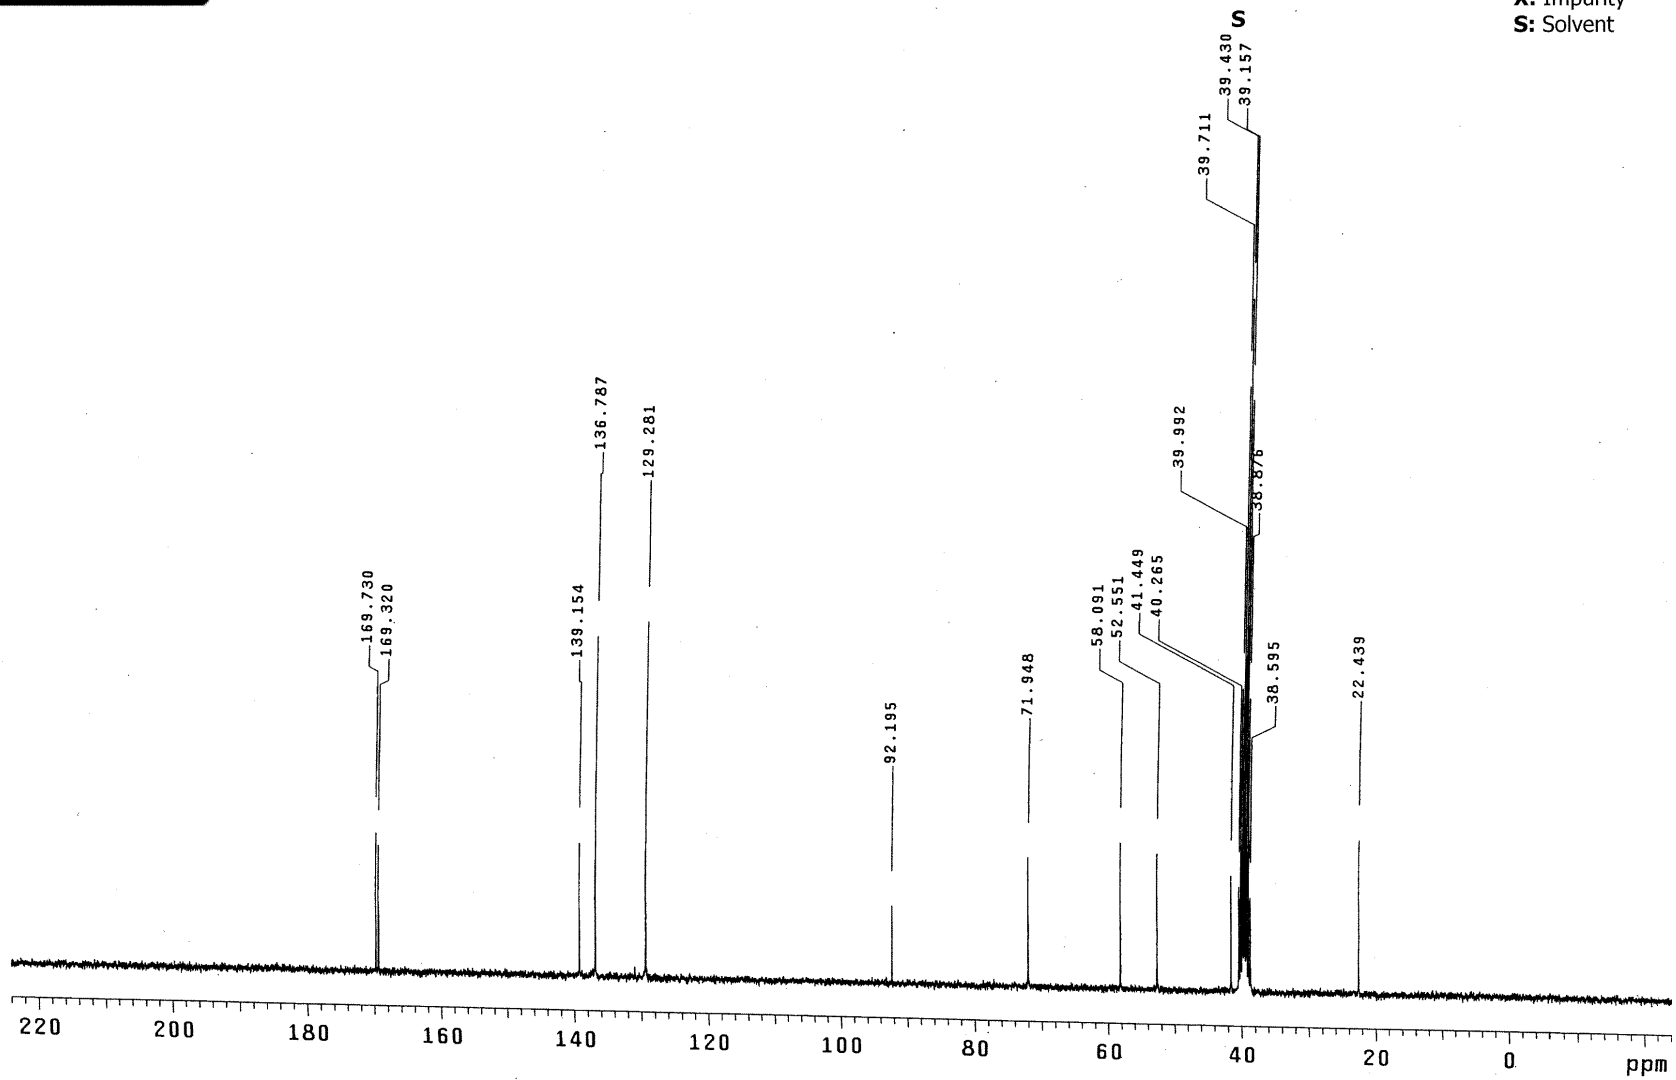

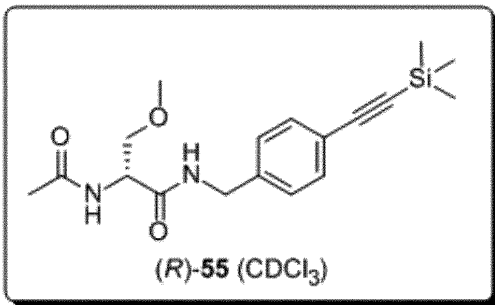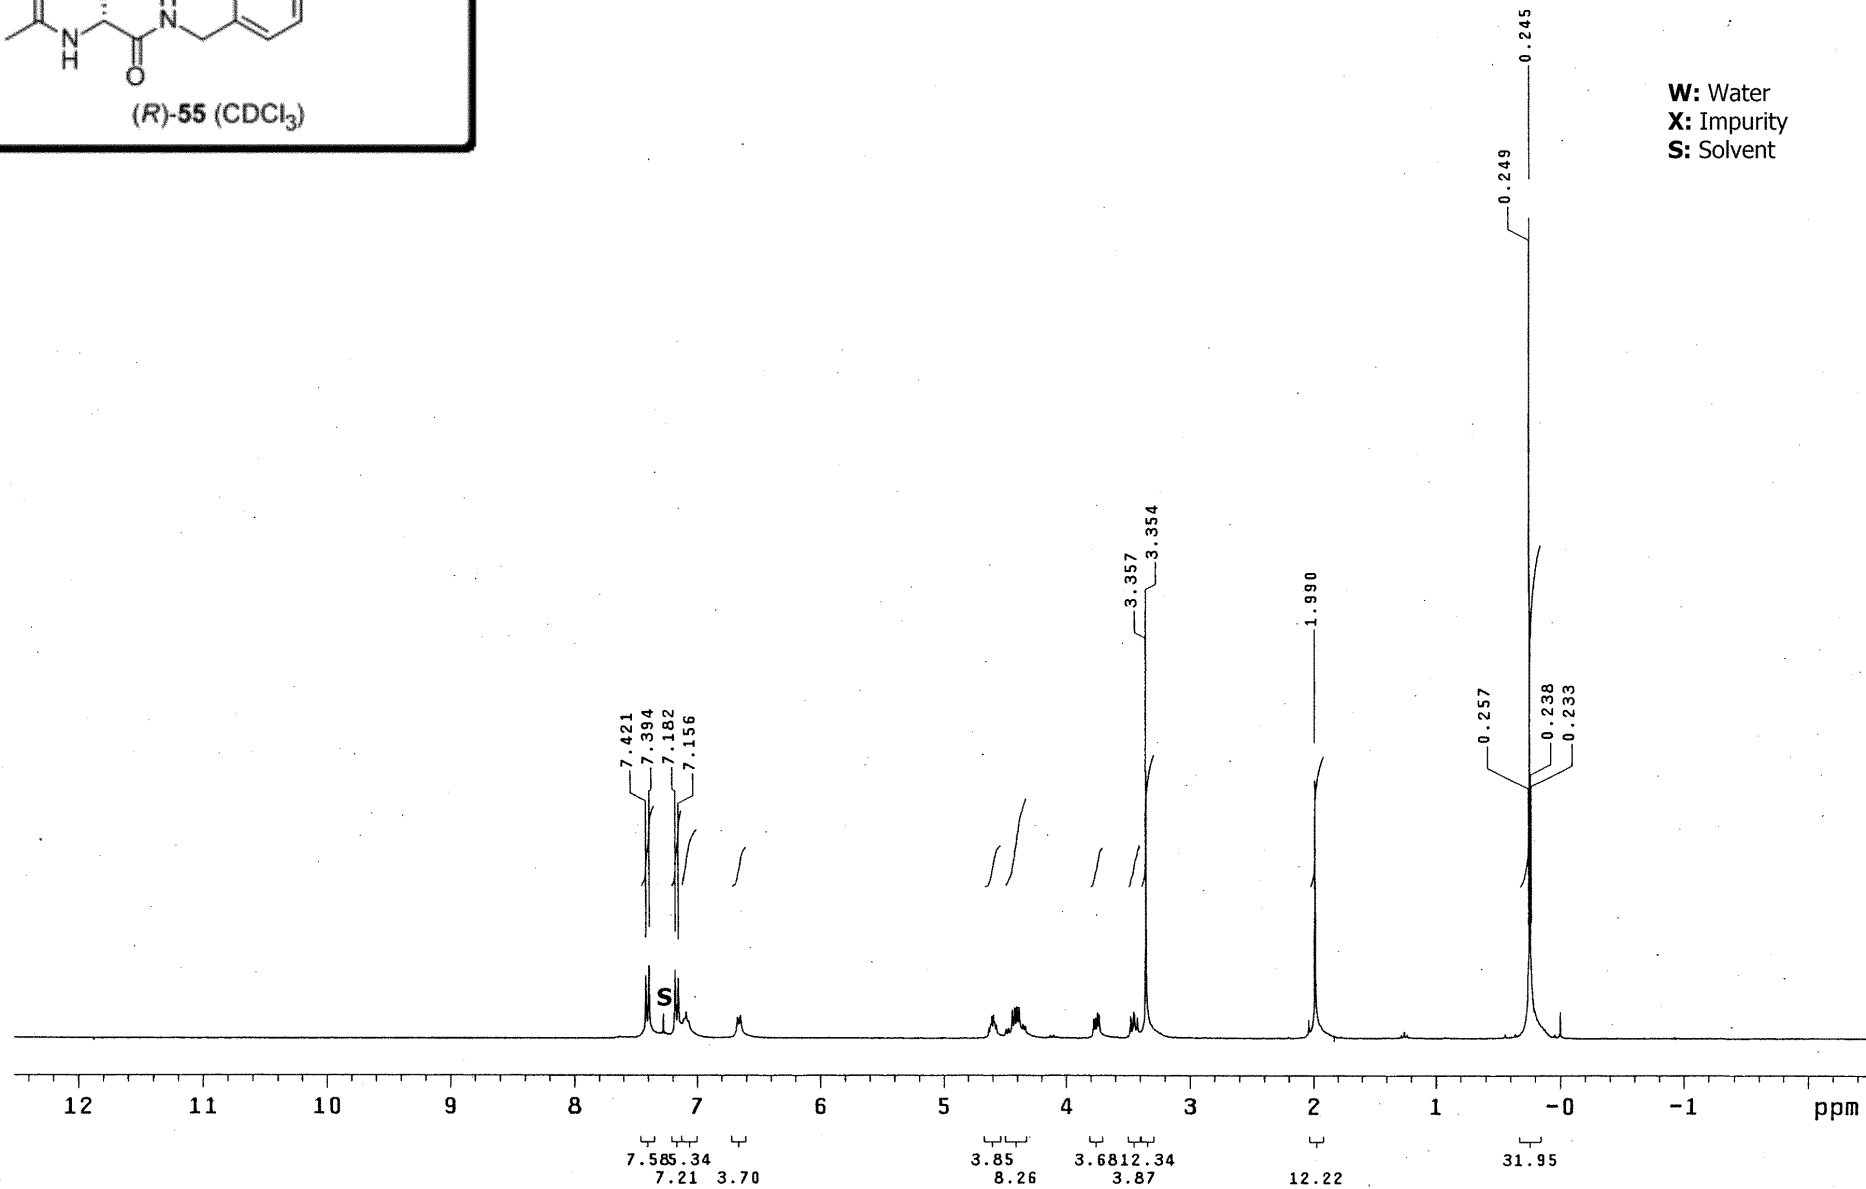

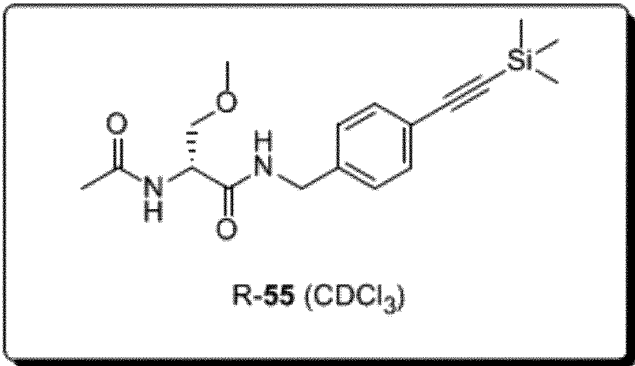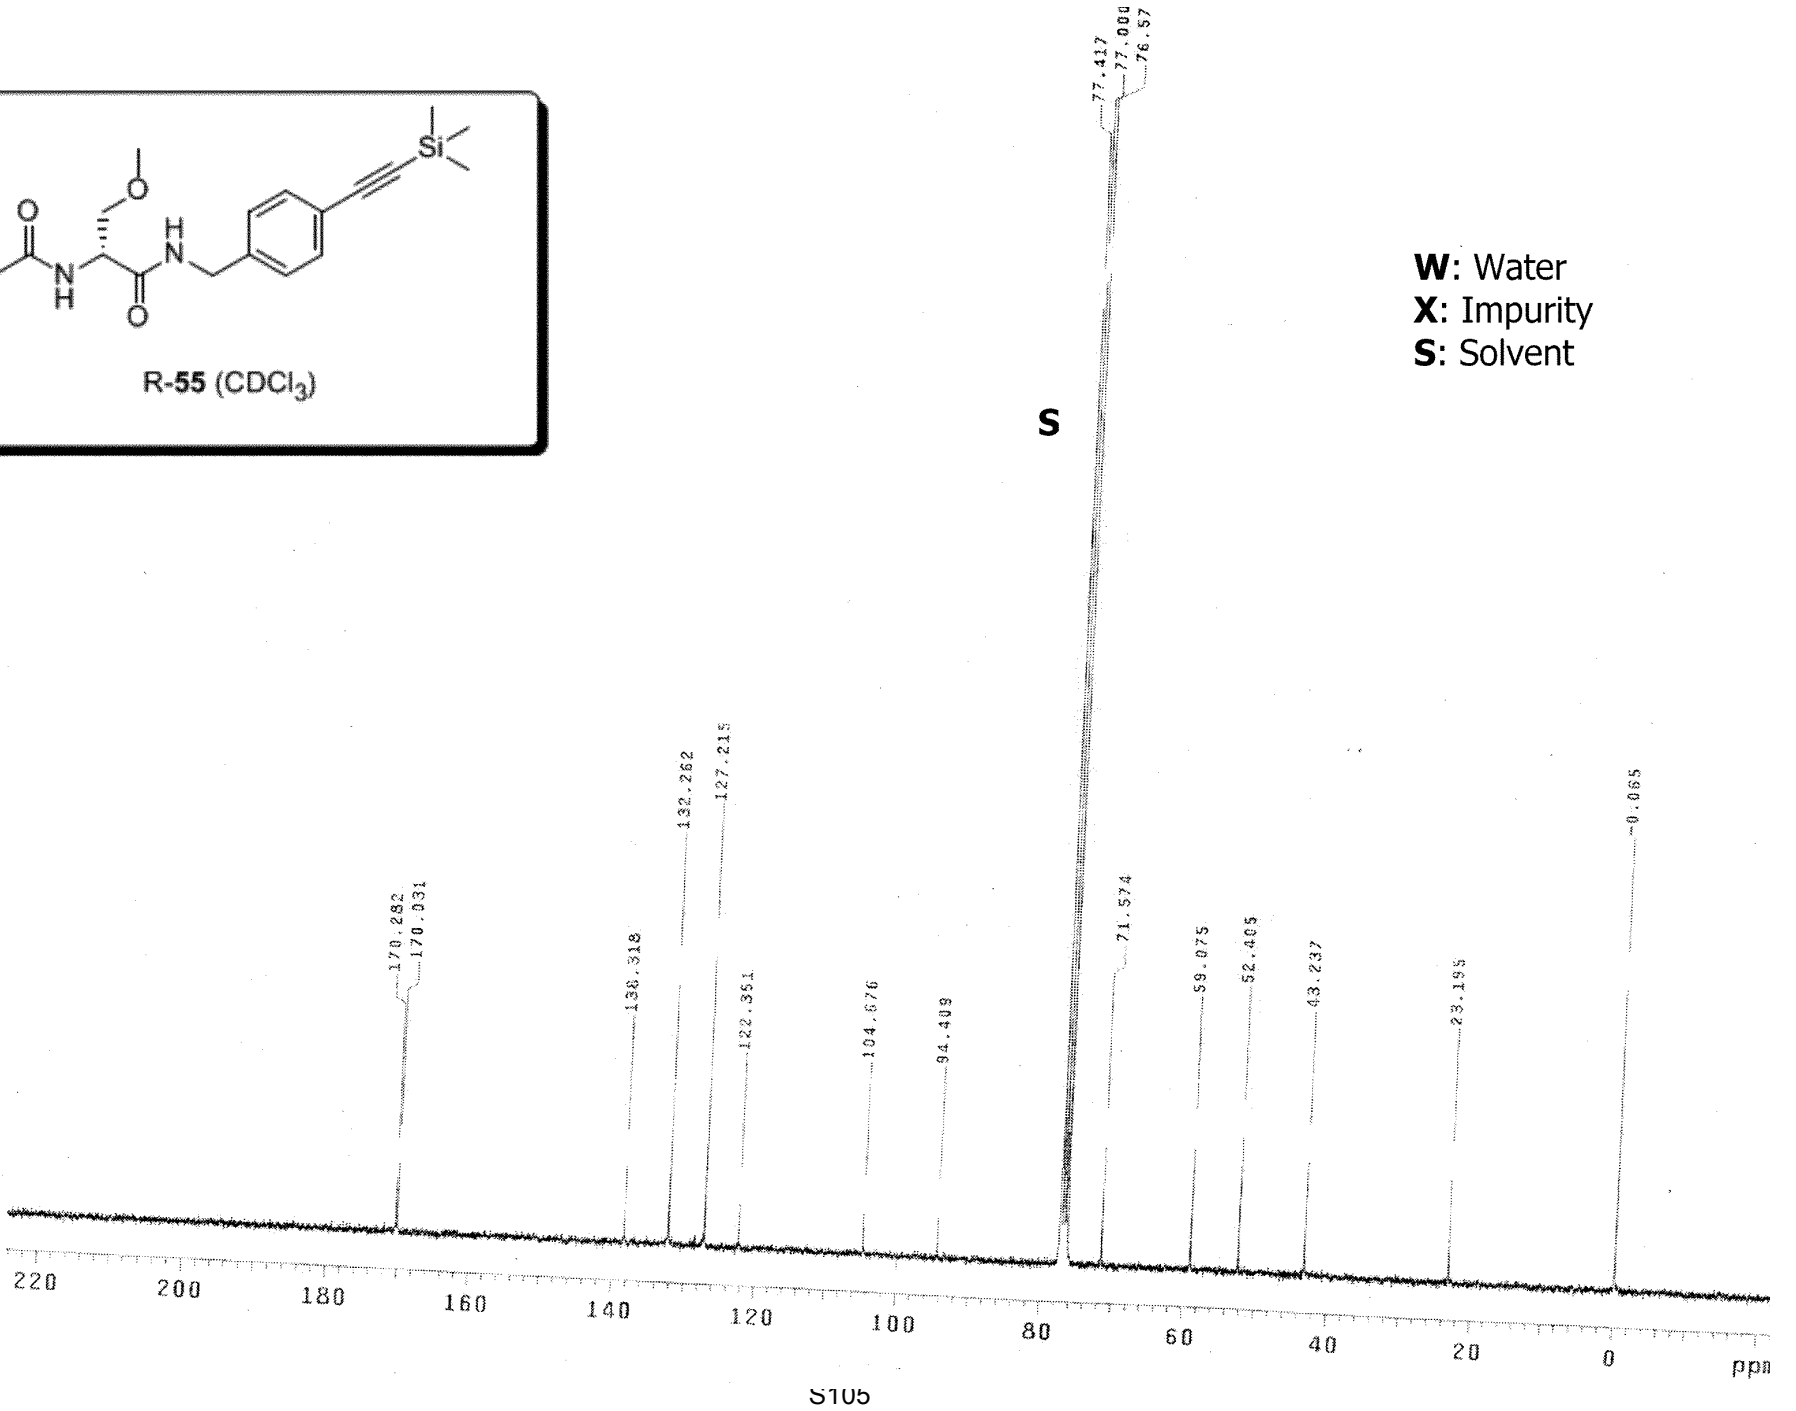

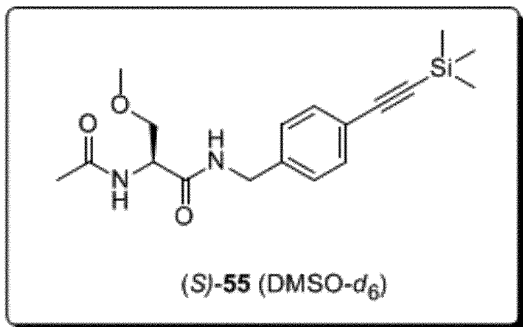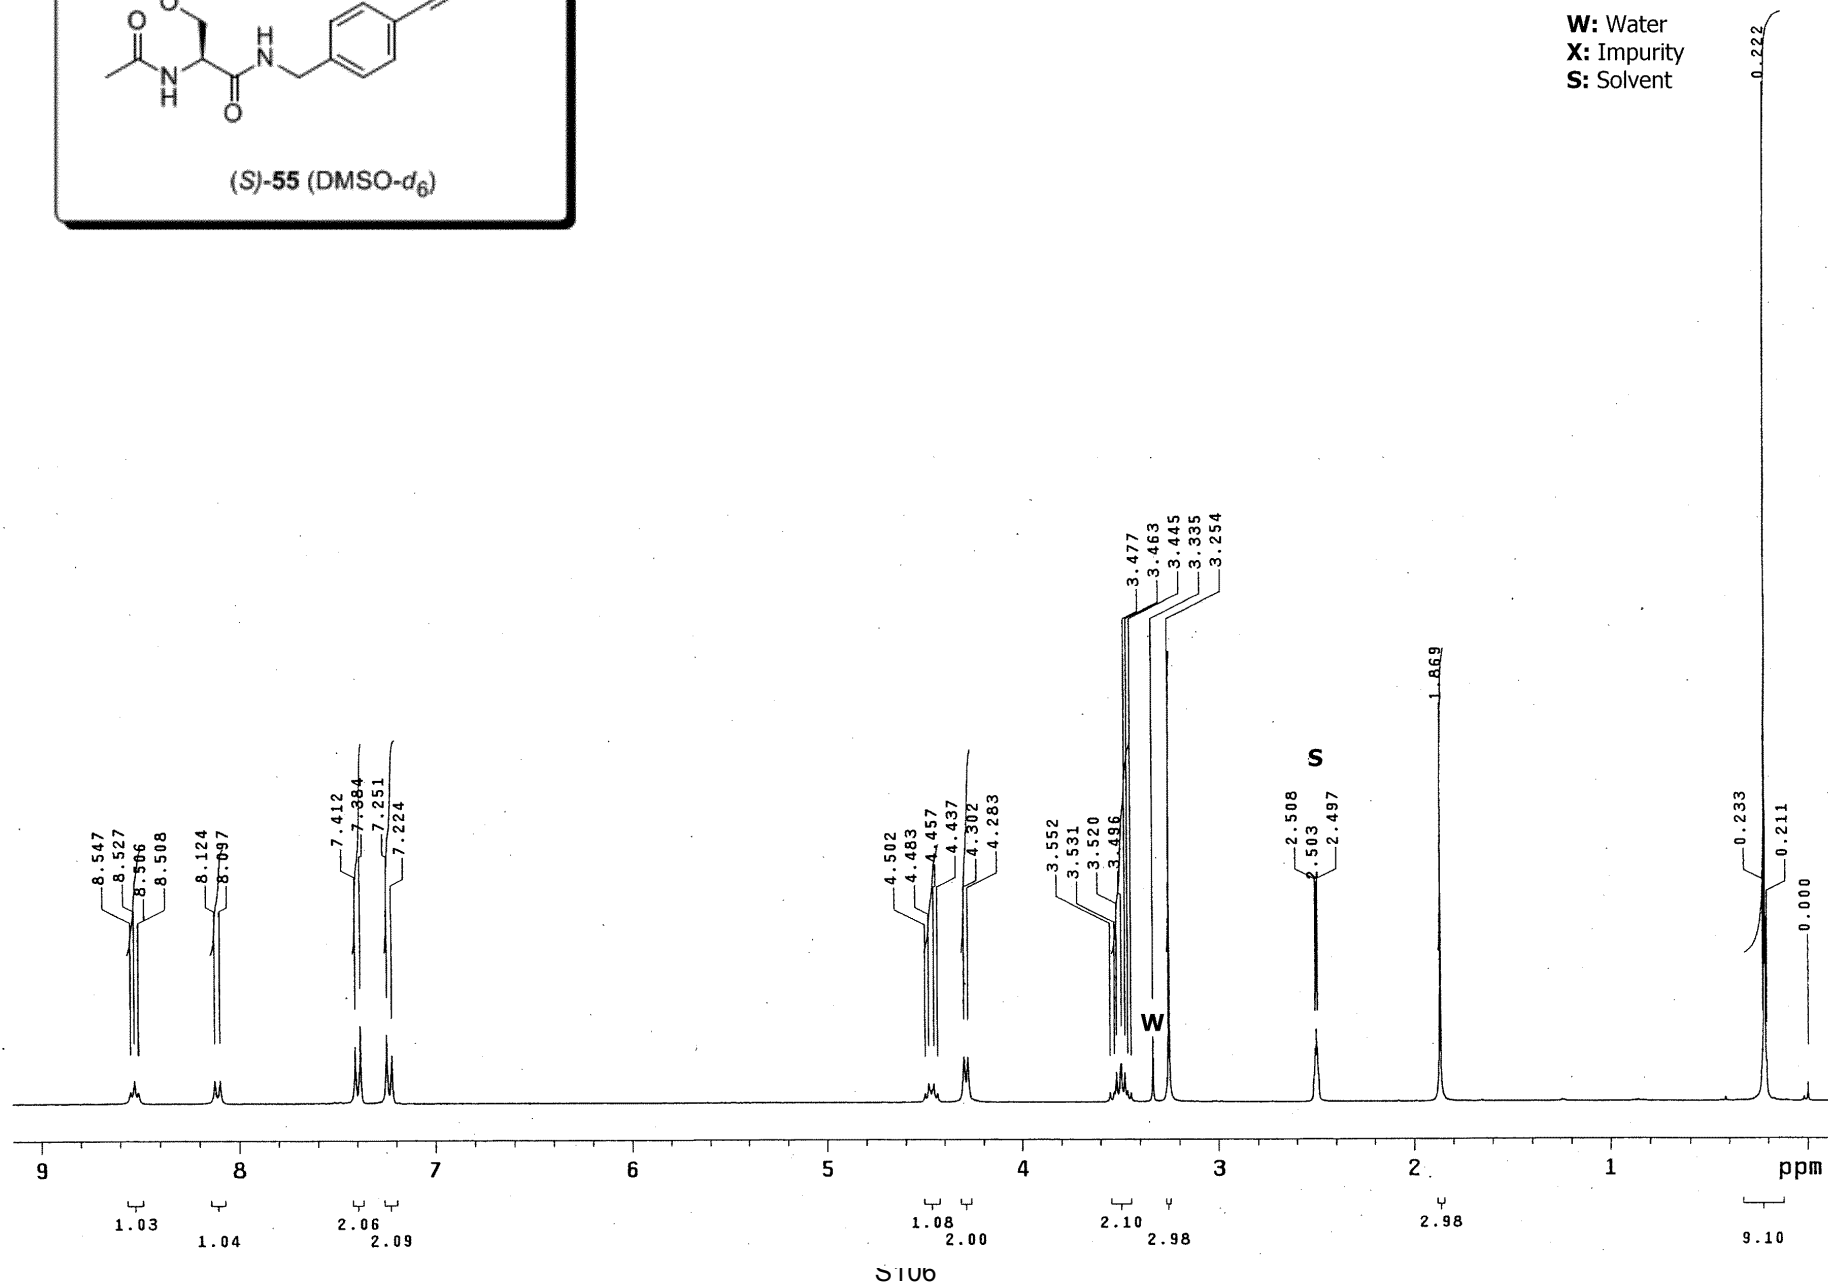

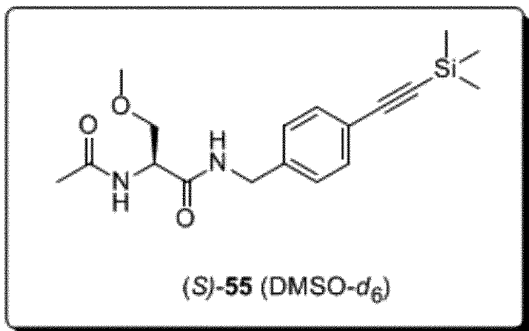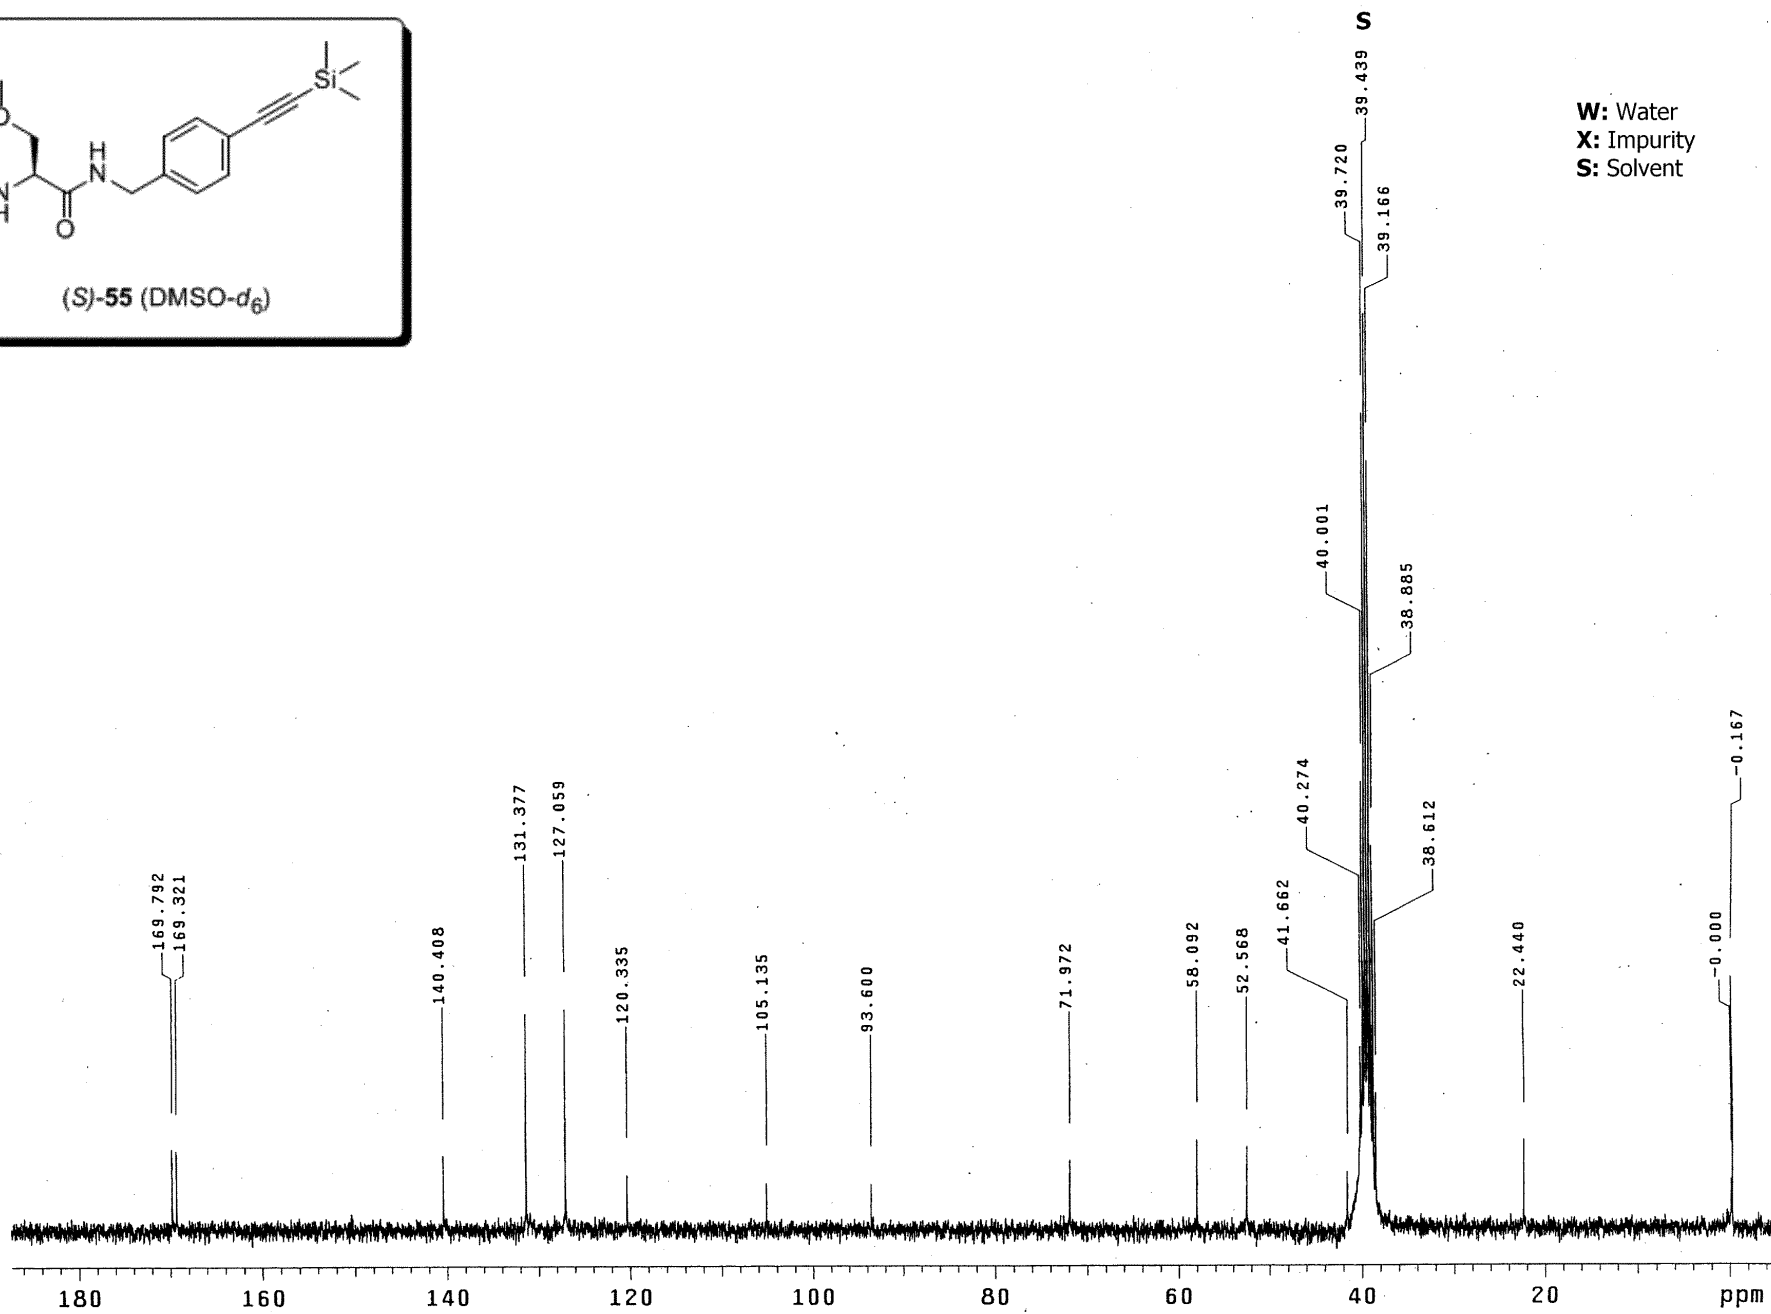

Supplement: NIHMS150620-supplement-1_si_001.pdf [file NIHMS150620-supplement-1_si_001.pdf]
